# Supplementary material
Source: PubMed Central journal article supplement (PMC7492397)
Supplement: NIHMS1573257-supplement-1.pdf [file NIHMS1573257-supplement-1.pdf]

## Supplementary information for

### Prenatal food insecurity post Hurricane Maria is associated with decreased *Veillonella*

#### In the infant gut

Leyao Wang<sup>1, \*</sup>, David de Ángel Solá<sup>2</sup>, Midnela Acevedo Flores<sup>3</sup>, Andrew Schriefer<sup>4</sup>, Leran Wang<sup>5</sup>, Kamil Gerónimo López<sup>3</sup>, Alison Chang<sup>5</sup>, Barbara Warner<sup>6</sup>, Liang Shan<sup>5</sup>, Lori R. Holtz<sup>6</sup>, Nicolás Rosario Matos<sup>3</sup>

1. Department of Medicine, Division of Pulmonary and Critical Care Medicine, Washington University in St. Louis School of Medicine, St. Louis, MO.

2. Departments of Internal Medicine and Pediatrics, Yale School of Medicine, New Haven, CT.

3. San Juan City Hospital Research Unit, Department of Pediatrics and Obstetrics and Gynecology, San Juan Hospital, San Juan, PR.

4. Department of Genetics, Washington University in St. Louis School of Medicine, St. Louis, MO.

5. Department of Medicine, Washington University in St. Louis School of Medicine, St. Louis, MO.

6. Department of Pediatrics, Washington University in St. Louis School of Medicine, St. Louis, MO.

\*, Corresponding author.

#### Corresponding author:

Leyao Wang PhD MPH,

Washington University in St. Louis School of Medicine

425 South Euclid Avenue, Campus Box: 8052

Phone: 314-362-8892

Email address: [Leyao.wang@wustl.edu](mailto:Leyao.wang@wustl.edu)

Figure S1.

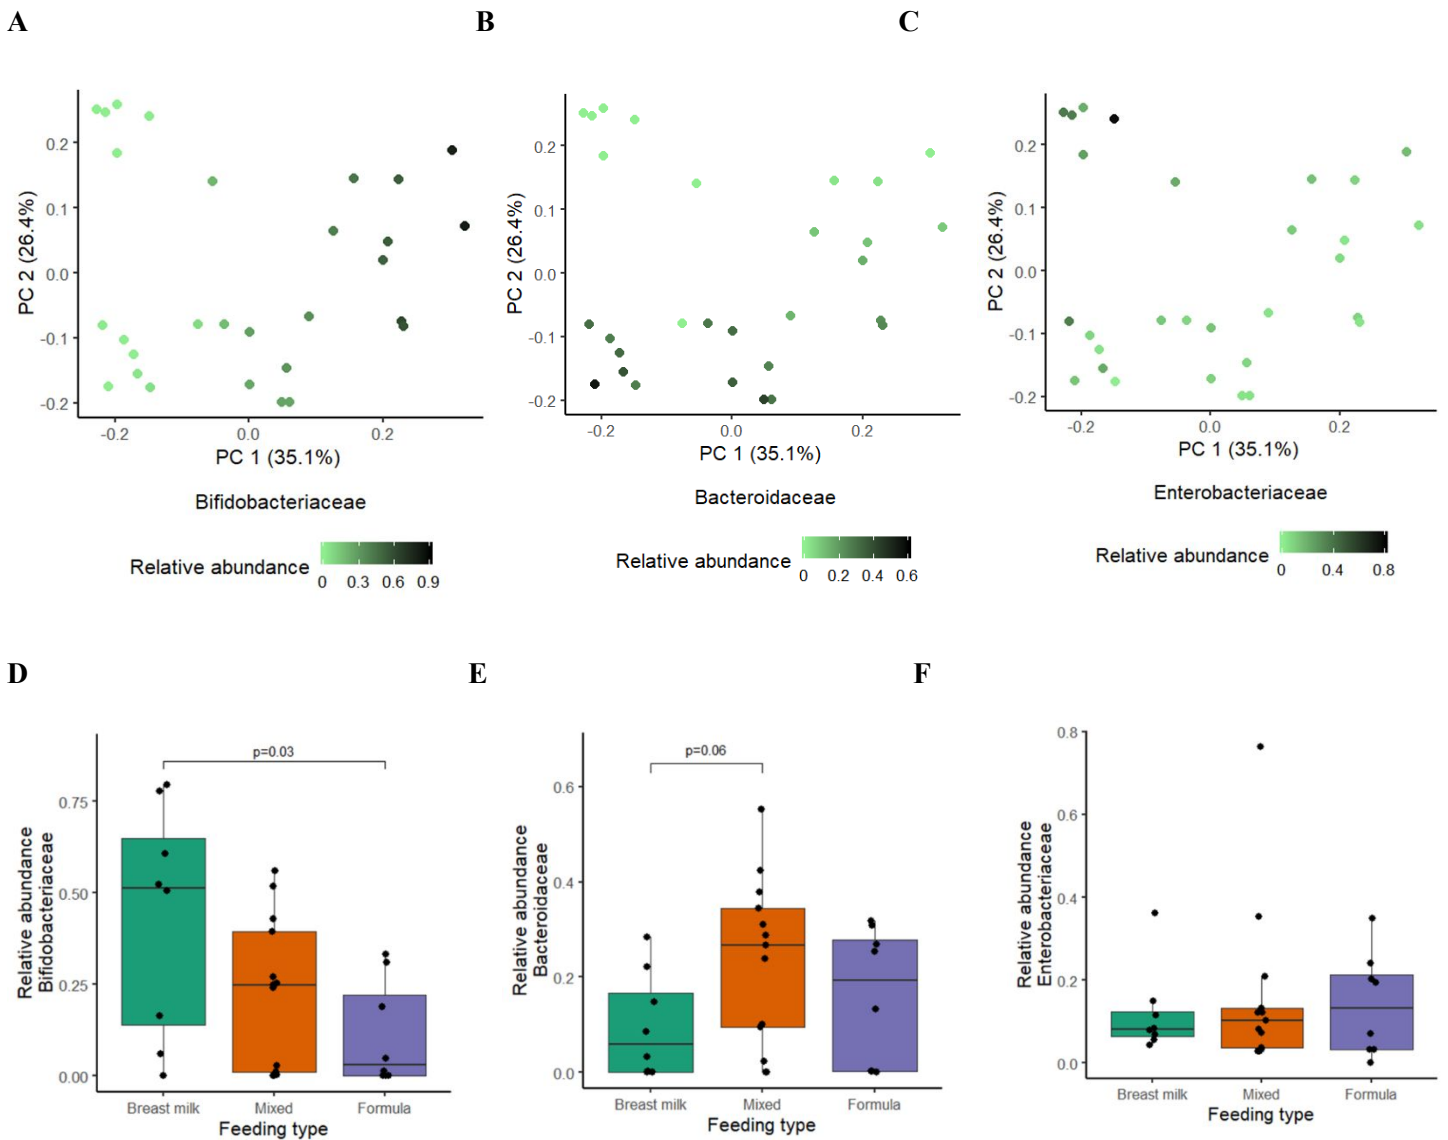

Figure S1. **The three major bacterial families in the gut microbiome.** Principal Coordinate Analysis (PCoA) plot of weighted UniFrac distance shaded from low (green) to high (black) relative abundance of *Bifidobacteriaceae* (A), *Bacteroidaceae* (B), *Enterobacteriaceae* (C), highlighting three distinct clusters. Relative abundance of *Bifidobacteriaceae* (D), *Bacteroidaceae* (E), and *Enterobacteriaceae* (F) separated by feeding types. Pair-wise statistical significance was determined using Wilcoxon rank sum test.

Figure S2.

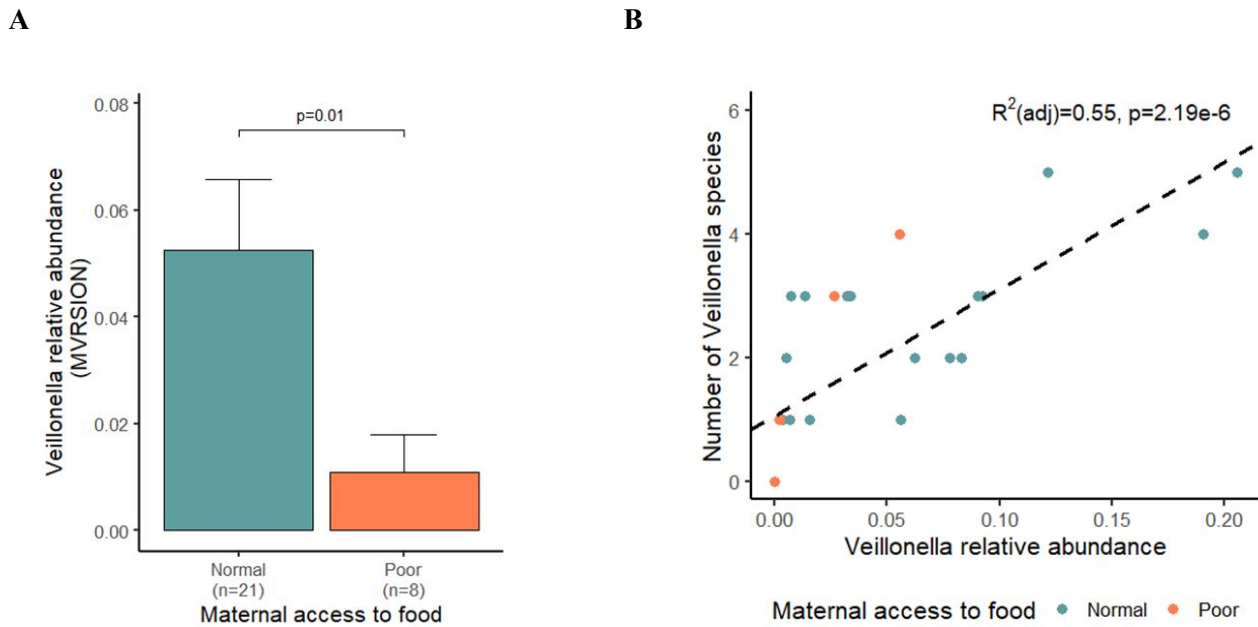

Figure S2. **The relative abundance and number of species in *Veillonella* spp. identified by MVRSION.** **A.** the relative abundance of *Veillonella* spp. by prenatal maternal food security status. Statistical significance was determined using Wilcoxon rank sum test. Values are means  $\pm$  standard error. **B.** correlation of the relative abundance of *Veillonella* spp. and number of *Veillonella* species. Statistical significance was determined using linear regression model. The dashed black line represents the best fit line in the model.

Figure S3.

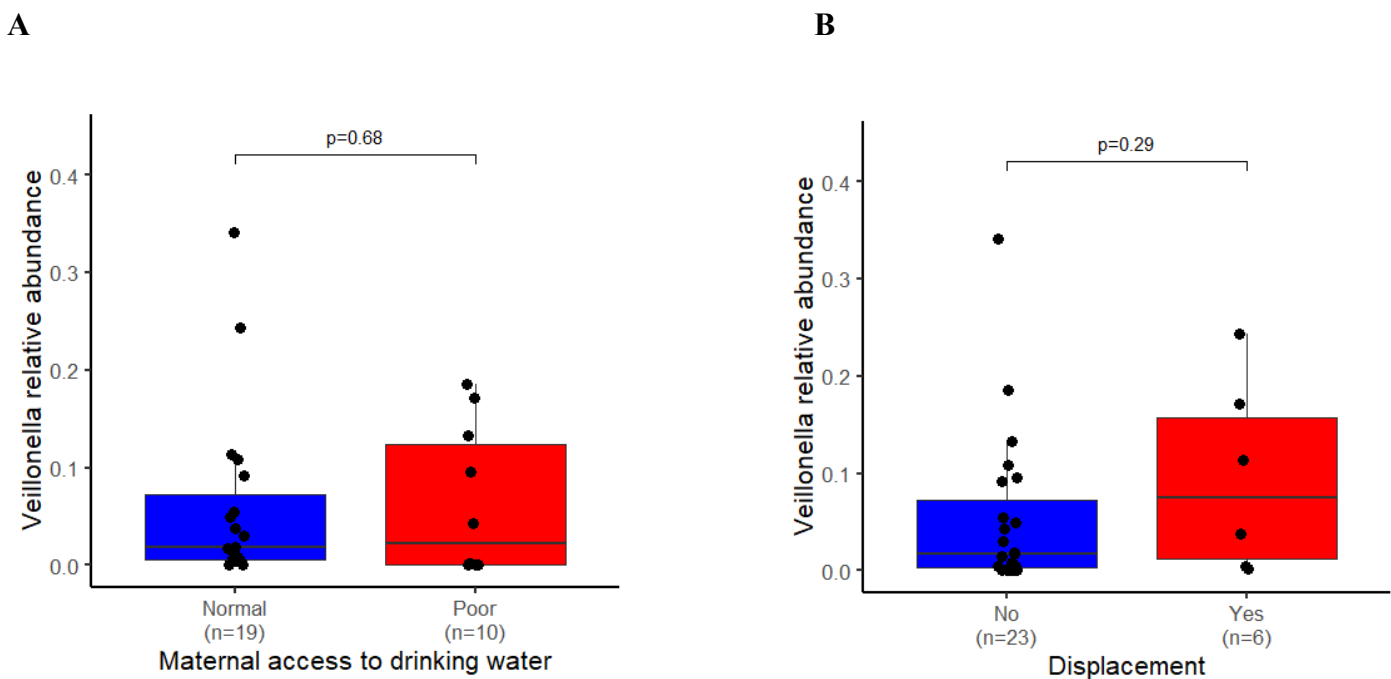

Figure S3. **The relative abundance of *Veillonella* spp. over other hurricane stressors.** **A.** the relative abundance of *Veillonella* spp. by drinking water security. **B.** the relative abundance of *Veillonella* spp. by displacement. Statistical significance was determined using Wilcoxon rank sum test.

**Table S1. The feature importance of most prevalent bacteria genera in predicting prenatal maternal food insecurity in the random-forest model.**

| Random-Forest rank | Feature Name (Phyla; Genus)                     | Importance Score |
|--------------------|-------------------------------------------------|------------------|
| 1                  | Firmicutes; Veillonella                         | 0.127            |
| 2                  | Proteobacteria; Erwinia                         | 0.070            |
| 3                  | Firmicutes; Streptococcus                       | 0.058            |
| 4                  | Firmicutes; Staphylococcus                      | 0.052            |
| 5                  | Proteobacteria; Enterobacteriaceae_unclassified | 0.050            |
| 6                  | Firmicutes; Eubacterium                         | 0.049            |
| 7                  | Firmicutes; Oscillospira                        | 0.045            |
| 8                  | Firmicutes; Lachnospiraceae_unclassified        | 0.035            |
| 9                  | Firmicutes; Lactococcus                         | 0.032            |
| 10                 | Firmicutes; Clostridium                         | 0.030            |
| 11                 | Firmicutes; Clostridiaceae_unclassified         | 0.026            |
| 12                 | Firmicutes; Dorea                               | 0.026            |
| 13                 | Bacteroidetes; Bacteroides                      | 0.025            |
| 14                 | Firmicutes; Granulicatella                      | 0.025            |
| 15                 | Proteobacteria; Citrobacter                     | 0.024            |
| 16                 | Actinobacteria; Rothia                          | 0.023            |
| 17                 | Firmicutes; Megasphaera                         | 0.022            |
| 18                 | Actinobacteria; Eggerthella                     | 0.021            |
| 19                 | Firmicutes; Blautia                             | 0.020            |
| 20                 | Proteobacteria; Proteus                         | 0.019            |
| 21                 | Actinobacteria; Corynebacterium                 | 0.017            |
| 22                 | Actinobacteria; Bifidobacterium                 | 0.017            |
| 23                 | Firmicutes; Peptostreptococcaceae_unclassified  | 0.017            |
| 24                 | Actinobacteria; Actinomyces                     | 0.017            |
| 25                 | Firmicutes; Ruminococcaceae_unclassified        | 0.017            |
| 26                 | Firmicutes; Enterococcus                        | 0.016            |
| 27                 | Firmicutes; Erysipelotrichaceae_unclassified    | 0.016            |
| 28                 | Firmicutes; Lactobacillus                       | 0.014            |
| 29                 | Proteobacteria; Klebsiella                      | 0.013            |
| 30                 | Firmicutes; Ruminococcus                        | 0.012            |
| 31                 | Firmicutes; Coprococcus                         | 0.012            |
| 32                 | Bacteroidetes; Parabacteroides                  | 0.012            |
| 33                 | Firmicutes; Ruminococcus                        | 0.011            |
| 34                 | Verrucomicrobia; Akkermansia                    | 0.009            |
| 35                 | Proteobacteria; Haemophilus                     | 0.007            |
| 36                 | Actinobacteria; Collinsella                     | 0.006            |
| 37                 | Firmicutes; Alloicoccus                         | 0.004            |
| 38                 | Proteobacteria; Acinetobacter                   | 0.002            |

**Table S2. The top 10 differentially abundant genera by maternal food security status identified in DESeq2.**

| <b>Genus</b>                     | <b>Log<sub>2</sub> fold change</b> | <b>p-value</b>        | <b>Adjusted p-value<sup>a</sup></b> |
|----------------------------------|------------------------------------|-----------------------|-------------------------------------|
| Veillonella                      | -4.17                              | $2.37 \times 10^{-4}$ | 0.026                               |
| Streptococcus                    | -3.08                              | $2.81 \times 10^{-3}$ | 0.156                               |
| Akkermansia                      | -7.18                              | $5.36 \times 10^{-3}$ | 0.198                               |
| Sutterella                       | -8.28                              | $1.22 \times 10^{-2}$ | 0.297                               |
| Coprococcus                      | -5.13                              | $1.34 \times 10^{-2}$ | 0.297                               |
| Erysipelotrichaceae_unclassified | -5.44                              | $1.69 \times 10^{-2}$ | 0.312                               |
| Clostridium                      | -3.32                              | $3.17 \times 10^{-2}$ | 0.503                               |
| Clostridiaceae_unclassified      | -2.73                              | $4.13 \times 10^{-2}$ | 0.572                               |
| Bilophila                        | -5.58                              | $5.20 \times 10^{-2}$ | 0.642                               |
| Megasphaera                      | -5.11                              | 0.10                  | 0.752                               |

a, P-value was Benjamini–Hochberg adjusted for 206 genera included in the analysis.

**1) During Hurricanes Irma or Maria, was the mother of the baby afraid of dying or being gravely hurt, or did she fear that the family would suffer significant injuries?**

- Yes
- No
- Unsure

**2) Was any member of the nuclear family gravely hurt or did any family member die because of either Hurricane?**

- Yes
- No

**2A) If you answered yes, which family member (in relationship to the baby) was hurt or deceased? \_\_\_\_\_**

**3) Was there any health problem during the pregnancy because of the hurricanes?**

- Yes
- No

**3A) If so, what was the problem? \_\_\_\_\_**

**4) How many pre-natal care visits did the mother lose because of the hurricanes?**

- Visits were not interrupted
- Yes, visits were interrupted \_\_\_\_ [number] times

**5) Was the baby's family displaced from their home or have they needed temporary housing due to disastrous conditions brought about by Hurricanes Irma or Maria?**

- No, the family remained in their home despite the Hurricanes
- Yes, the family had to seek alternative housing.

**5A) If the family was displaced, how long did the family lack a home they could call their own?**

\_\_\_\_\_

**6) Approximately, how much time, if any, did you spend outside of Puerto Rico because of the hurricanes?**

Approximate dates were from \_\_\_\_\_ to \_\_\_\_\_

**7) Was the family without access to electric power, or with very limited access, for long periods of time as a consequence of the hurricanes?**

\_\_\_\_\_ No

\_\_\_\_\_ Yes

**7A) If access was limited, please specify how much time you were without power:**

- a) Less than one month
- b) 1-2 months
- c) 2-3 months
- d) 3-4 months
- e) 4-5 months
- f) 5-6 months
- g) 6 months of more

**8) Was the family exposed to the fumes of electric generators (home power plants) for long periods of time as a consequence of the hurricanes? Choose one:**

\_\_\_\_\_ No, we were not exposed for a long time.

\_\_\_\_\_ Yes, we were exposed to generator fumes for a long time.

**8A) If the answer was yes, please specify how much time you were exposed to generator fumes:**

- a) Less than one month
- b) 1-2 months
- c) 2-3 months
- d) 3-4 months
- e) 4-5 months
- f) 5-6 months
- g) 6 months of more

**9) Was the family exposed to floods or mold epidemics at home as a consequence of hurricanes Irma or Maria? Choose one:**

\_\_\_\_\_ No, there were no such problems

\_\_\_\_\_ Yes, we were exposed to floods and mold epidemics

**9A) If the answer was yes, please specify how much time you were exposed:**

- a) Less than one month
- b) 1-2 months
- c) 2-3 months
- d) 3-4 months
- e) 4-5 months
- f) 5-6 months
- g) 6 months of more

**10) Was the family exposed to debris around the home as a consequence of hurricanes Irma or Maria? Choose one:**

\_\_\_\_\_ No, there were no such problems

\_\_\_\_\_ Yes, we were exposed to debris for a long time

**10A) If the answer was yes, please specify how much time you were exposed:**

- a) Less than one month
- b) 1-2 months
- c) 2-3 months
- d) 3-4 months
- e) 4-5 months
- f) 5-6 months
- g) 6 months of more

**11) Was the nuclear family unable to Access drinking water, food or medications because of either Hurricane?**

\_\_\_\_\_ Yes, because of the Hurricanes, poor access to: \_\_\_\_\_

\_\_\_\_\_ Yes, but because of other causes (not because of the Hurricanes) poor access to:  
\_\_\_\_\_

\_\_\_\_\_ No

**11A) If so, for how long?**



- a) Less than 1 month
- b) 1-2 months
- c) 2-3 months
- d) 3-4 months
- e) 4-5 months
- f) 5-6 months
- g) more than 6 months
- h) not applicable

**12) Was the family income significantly changed because of Hurricanes Irma or Maria?**

\_\_\_\_\_ No, it was stable or only varied slightly

\_\_\_\_\_ Yes, because the family lost income, and this impacted our quality of life significantly

\_\_\_\_\_ Yes, because the income significantly improved.

**12A) If there was a change to income, how long before the income normalized?**

- a) Less than 1 month
- b) 1-2 months
- c) 2-3 months
- d) 3-4 months
- e) 4-5 months
- f) 5-6 months
- g) more than 6 months
- h) It has NOT normalized













|         |   |   |    |    |     |    |      |    |
|---------|---|---|----|----|-----|----|------|----|
| 562084  | 0 | 0 | 0  | 0  | 3   | 0  | 0    | 0  |
| 585227  | 0 | 4 | 0  | 0  | 0   | 0  | 0    | 0  |
| 187389  | 0 | 0 | 0  | 0  | 0   | 0  | 0    | 0  |
| 307113  | 0 | 0 | 1  | 0  | 0   | 0  | 0    | 0  |
| 4473975 | 0 | 0 | 0  | 0  | 0   | 0  | 1    | 0  |
| 541328  | 0 | 0 | 0  | 0  | 229 | 14 | 1731 | 0  |
| 355685  | 0 | 0 | 0  | 0  | 0   | 0  | 0    | 0  |
| 1105689 | 0 | 0 | 0  | 0  | 0   | 0  | 0    | 0  |
| 183604  | 0 | 0 | 0  | 0  | 0   | 0  | 0    | 0  |
| 326569  | 0 | 0 | 0  | 0  | 0   | 0  | 0    | 0  |
| 193302  | 0 | 0 | 1  | 0  | 0   | 0  | 0    | 0  |
| 567928  | 0 | 0 | 0  | 0  | 0   | 0  | 0    | 0  |
| 1078207 | 1 | 0 | 1  | 3  | 0   | 2  | 2    | 1  |
| 503387  | 0 | 0 | 0  | 0  | 0   | 0  | 0    | 0  |
| 361619  | 0 | 0 | 0  | 0  | 0   | 0  | 0    | 0  |
| 1034378 | 0 | 0 | 0  | 0  | 0   | 0  | 0    | 0  |
| 180556  | 0 | 0 | 0  | 0  | 0   | 0  | 0    | 0  |
| 589313  | 0 | 4 | 0  | 0  | 0   | 0  | 0    | 0  |
| 185390  | 0 | 0 | 0  | 0  | 0   | 0  | 0    | 0  |
| 239924  | 0 | 0 | 0  | 0  | 0   | 0  | 0    | 0  |
| 4410265 | 0 | 0 | 0  | 0  | 5   | 0  | 0    | 0  |
| 554163  | 0 | 0 | 0  | 0  | 0   | 0  | 0    | 0  |
| 818777  | 0 | 0 | 0  | 0  | 0   | 0  | 0    | 0  |
| 505626  | 3 | 0 | 0  | 0  | 0   | 0  | 0    | 0  |
| 968954  | 0 | 0 | 0  | 0  | 0   | 0  | 1    | 0  |
| 359689  | 0 | 0 | 0  | 0  | 0   | 0  | 0    | 0  |
| 1040713 | 0 | 0 | 0  | 0  | 0   | 0  | 1    | 0  |
| 359175  | 0 | 0 | 0  | 0  | 0   | 0  | 0    | 0  |
| 843459  | 0 | 0 | 0  | 0  | 0   | 0  | 0    | 0  |
| 563359  | 0 | 0 | 0  | 0  | 0   | 0  | 0    | 0  |
| 2658058 | 0 | 0 | 0  | 0  | 0   | 0  | 0    | 0  |
| 173103  | 0 | 0 | 0  | 0  | 0   | 0  | 0    | 0  |
| 196134  | 0 | 2 | 0  | 0  | 0   | 0  | 0    | 0  |
| 3449122 | 0 | 0 | 0  | 0  | 0   | 0  | 0    | 0  |
| 1088134 | 0 | 1 | 3  | 0  | 0   | 0  | 2    | 0  |
| 1085410 | 0 | 0 | 0  | 0  | 0   | 0  | 0    | 0  |
| 295485  | 0 | 0 | 0  | 0  | 0   | 0  | 0    | 0  |
| 1001007 | 0 | 0 | 0  | 0  | 0   | 0  | 0    | 0  |
| 813479  | 0 | 6 | 24 | 2  | 1   | 4  | 0    | 0  |
| 1033013 | 0 | 0 | 0  | 0  | 0   | 0  | 0    | 0  |
| 359779  | 0 | 0 | 0  | 0  | 0   | 0  | 0    | 0  |
| 2656868 | 0 | 1 | 0  | 0  | 1   | 0  | 2    | 0  |
| 235024  | 0 | 0 | 0  | 0  | 0   | 0  | 0    | 0  |
| 1809696 | 0 | 0 | 7  | 16 | 8   | 18 | 58   | 37 |
| 977188  | 0 | 0 | 0  | 0  | 0   | 0  | 0    | 0  |
| 581782  | 1 | 0 | 0  | 0  | 1   | 0  | 0    | 0  |
| 4294457 | 0 | 0 | 0  | 1  | 0   | 0  | 1    | 0  |
| 100027  | 0 | 1 | 0  | 0  | 0   | 0  | 0    | 0  |
| 328617  | 0 | 0 | 0  | 0  | 1   | 1  | 0    | 0  |
| 559527  | 2 | 0 | 6  | 10 | 7   | 0  | 0    | 0  |
| 513445  | 0 | 0 | 0  | 0  | 0   | 0  | 0    | 1  |
| 4326869 | 0 | 0 | 0  | 0  | 0   | 0  | 0    | 0  |
| 2423305 | 0 | 0 | 0  | 0  | 0   | 0  | 0    | 0  |
| 441155  | 0 | 0 | 0  | 0  | 0   | 0  | 0    | 0  |
| 1654474 | 0 | 1 | 2  | 0  | 0   | 1  | 0    | 0  |
| 186385  | 0 | 0 | 2  | 0  | 0   | 0  | 0    | 5  |



|         |     |   |    |    |   |   |   |     |
|---------|-----|---|----|----|---|---|---|-----|
| 345540  | 0   | 0 | 0  | 2  | 1 | 0 | 0 | 1   |
| 152859  | 0   | 0 | 0  | 0  | 0 | 0 | 0 | 0   |
| 332317  | 0   | 0 | 0  | 0  | 2 | 0 | 0 | 0   |
| 652696  | 2   | 0 | 7  | 6  | 5 | 1 | 0 | 0   |
| 3889756 | 0   | 0 | 0  | 0  | 0 | 0 | 0 | 0   |
| 559328  | 0   | 0 | 0  | 0  | 0 | 0 | 0 | 0   |
| 4346722 | 0   | 0 | 0  | 0  | 0 | 0 | 0 | 0   |
| 537775  | 0   | 0 | 0  | 0  | 0 | 0 | 0 | 0   |
| 343257  | 0   | 0 | 0  | 0  | 0 | 0 | 0 | 631 |
| 190309  | 0   | 0 | 0  | 0  | 1 | 1 | 0 | 0   |
| 4428042 | 0   | 0 | 0  | 0  | 0 | 0 | 1 | 0   |
| 636296  | 0   | 0 | 0  | 0  | 0 | 0 | 0 | 15  |
| 1013285 | 2   | 0 | 0  | 0  | 0 | 0 | 0 | 0   |
| 185812  | 0   | 0 | 0  | 0  | 0 | 0 | 0 | 0   |
| 3820075 | 0   | 0 | 0  | 0  | 0 | 0 | 0 | 0   |
| 865469  | 0   | 0 | 0  | 0  | 0 | 0 | 0 | 0   |
| 181467  | 0   | 0 | 0  | 0  | 0 | 0 | 0 | 0   |
| 324443  | 0   | 0 | 0  | 6  | 0 | 1 | 0 | 0   |
| 339948  | 0   | 0 | 1  | 0  | 0 | 0 | 0 | 0   |
| 820346  | 0   | 0 | 0  | 0  | 0 | 0 | 0 | 1   |
| 656774  | 0   | 0 | 0  | 0  | 0 | 0 | 0 | 0   |
| 1129971 | 0   | 0 | 0  | 0  | 0 | 0 | 0 | 0   |
| 137056  | 0   | 0 | 0  | 0  | 0 | 0 | 0 | 0   |
| 578058  | 0   | 0 | 0  | 0  | 0 | 0 | 0 | 0   |
| 292145  | 0   | 0 | 0  | 0  | 0 | 0 | 0 | 0   |
| 272150  | 0   | 0 | 0  | 0  | 0 | 0 | 0 | 0   |
| 3734841 | 0   | 0 | 0  | 0  | 0 | 0 | 0 | 0   |
| 1086274 | 0   | 0 | 0  | 0  | 0 | 0 | 0 | 0   |
| 108909  | 0   | 0 | 0  | 0  | 0 | 0 | 0 | 0   |
| 254649  | 0   | 0 | 0  | 0  | 0 | 0 | 0 | 0   |
| 254138  | 0   | 0 | 0  | 0  | 0 | 0 | 0 | 0   |
| 264967  | 0   | 0 | 0  | 0  | 9 | 0 | 0 | 0   |
| 194513  | 0   | 0 | 0  | 0  | 0 | 0 | 0 | 0   |
| 156357  | 0   | 0 | 35 | 0  | 0 | 0 | 0 | 0   |
| 993647  | 0   | 0 | 0  | 0  | 0 | 0 | 0 | 0   |
| 768553  | 855 | 6 | 0  | 0  | 0 | 0 | 0 | 0   |
| 198423  | 0   | 4 | 4  | 0  | 0 | 2 | 0 | 5   |
| 543491  | 0   | 0 | 0  | 0  | 0 | 0 | 0 | 0   |
| 567669  | 0   | 0 | 0  | 0  | 0 | 0 | 0 | 0   |
| 549232  | 0   | 0 | 0  | 0  | 0 | 0 | 0 | 0   |
| 4442390 | 0   | 0 | 0  | 0  | 0 | 0 | 1 | 0   |
| 1107027 | 0   | 0 | 0  | 0  | 5 | 0 | 0 | 0   |
| 103166  | 0   | 0 | 0  | 0  | 0 | 0 | 0 | 0   |
| 797229  | 1   | 6 | 9  | 3  | 4 | 6 | 3 | 0   |
| 342666  | 0   | 0 | 0  | 0  | 0 | 0 | 0 | 0   |
| 179865  | 0   | 0 | 0  | 0  | 0 | 0 | 0 | 0   |
| 194670  | 0   | 0 | 0  | 0  | 0 | 0 | 0 | 0   |
| 574021  | 0   | 0 | 0  | 0  | 1 | 0 | 0 | 0   |
| 179861  | 0   | 0 | 0  | 0  | 0 | 0 | 0 | 0   |
| 552376  | 1   | 1 | 0  | 0  | 1 | 0 | 0 | 0   |
| 517548  | 0   | 0 | 0  | 0  | 0 | 0 | 0 | 0   |
| 4377328 | 0   | 1 | 0  | 0  | 0 | 0 | 0 | 0   |
| 547181  | 0   | 0 | 0  | 0  | 0 | 0 | 0 | 0   |
| 585419  | 1   | 1 | 0  | 0  | 3 | 0 | 0 | 4   |
| 845273  | 0   | 3 | 0  | 0  | 0 | 0 | 0 | 0   |
| 132041  | 0   | 0 | 4  | 11 | 6 | 0 | 0 | 0   |

|         |   |     |   |   |      |   |    |    |
|---------|---|-----|---|---|------|---|----|----|
| 529652  | 0 | 0   | 0 | 0 | 0    | 0 | 0  | 3  |
| 185251  | 0 | 0   | 1 | 0 | 0    | 0 | 0  | 0  |
| 1108638 | 0 | 0   | 0 | 0 | 0    | 0 | 0  | 0  |
| 316132  | 0 | 0   | 0 | 0 | 2    | 0 | 0  | 0  |
| 942534  | 0 | 0   | 0 | 0 | 0    | 0 | 0  | 0  |
| 119010  | 0 | 0   | 0 | 1 | 0    | 0 | 1  | 0  |
| 3159130 | 0 | 0   | 0 | 0 | 0    | 0 | 0  | 0  |
| 812921  | 0 | 0   | 0 | 0 | 0    | 0 | 0  | 0  |
| 291561  | 0 | 2   | 0 | 0 | 0    | 0 | 0  | 0  |
| 365181  | 0 | 0   | 0 | 0 | 0    | 0 | 0  | 0  |
| 136127  | 0 | 0   | 0 | 0 | 0    | 0 | 0  | 0  |
| 941252  | 0 | 0   | 0 | 0 | 0    | 0 | 0  | 0  |
| 183169  | 0 | 0   | 1 | 0 | 0    | 0 | 0  | 0  |
| 2987636 | 0 | 1   | 0 | 0 | 0    | 1 | 2  | 0  |
| 171518  | 0 | 0   | 0 | 1 | 0    | 0 | 0  | 1  |
| 136946  | 0 | 0   | 1 | 0 | 1    | 0 | 2  | 0  |
| 3385021 | 0 | 0   | 0 | 0 | 0    | 0 | 0  | 0  |
| 989579  | 0 | 0   | 0 | 0 | 0    | 0 | 0  | 0  |
| 4290144 | 0 | 0   | 0 | 0 | 0    | 0 | 1  | 0  |
| 1113896 | 1 | 0   | 0 | 0 | 0    | 0 | 0  | 0  |
| 672587  | 0 | 0   | 0 | 0 | 0    | 0 | 0  | 0  |
| 588216  | 0 | 2   | 2 | 0 | 0    | 1 | 0  | 0  |
| 564961  | 0 | 0   | 0 | 0 | 0    | 0 | 0  | 0  |
| 192215  | 0 | 0   | 0 | 0 | 0    | 0 | 1  | 0  |
| 240810  | 0 | 1   | 0 | 0 | 0    | 0 | 0  | 0  |
| 1039477 | 0 | 0   | 0 | 0 | 0    | 0 | 0  | 0  |
| 145801  | 0 | 1   | 0 | 0 | 0    | 4 | 27 | 5  |
| 233981  | 0 | 0   | 0 | 0 | 0    | 0 | 0  | 0  |
| 358944  | 0 | 0   | 0 | 0 | 0    | 0 | 0  | 0  |
| 364824  | 0 | 0   | 0 | 0 | 0    | 0 | 0  | 0  |
| 524725  | 1 | 0   | 0 | 0 | 0    | 0 | 0  | 0  |
| 174818  | 0 | 0   | 0 | 0 | 0    | 0 | 0  | 0  |
| 198990  | 0 | 0   | 0 | 0 | 0    | 0 | 0  | 0  |
| 942927  | 0 | 0   | 0 | 0 | 0    | 0 | 0  | 0  |
| 897109  | 0 | 0   | 0 | 0 | 0    | 0 | 0  | 0  |
| 974249  | 0 | 0   | 0 | 0 | 0    | 0 | 0  | 0  |
| 2529285 | 0 | 1   | 2 | 0 | 0    | 0 | 5  | 0  |
| 260410  | 0 | 2   | 0 | 0 | 0    | 0 | 2  | 0  |
| 4470612 | 0 | 0   | 0 | 0 | 0    | 0 | 0  | 0  |
| 197072  | 0 | 0   | 0 | 2 | 0    | 4 | 0  | 0  |
| 583974  | 0 | 199 | 0 | 0 | 0    | 5 | 0  | 0  |
| 1116384 | 0 | 0   | 0 | 0 | 0    | 0 | 0  | 0  |
| 4299448 | 2 | 0   | 0 | 0 | 0    | 0 | 0  | 0  |
| 1091685 | 5 | 0   | 0 | 0 | 0    | 0 | 0  | 0  |
| 4394095 | 0 | 0   | 0 | 0 | 0    | 0 | 0  | 0  |
| 903426  | 0 | 0   | 0 | 0 | 0    | 0 | 0  | 0  |
| 820313  | 0 | 0   | 0 | 0 | 0    | 0 | 0  | 0  |
| 3544569 | 0 | 0   | 0 | 0 | 0    | 0 | 0  | 0  |
| 349065  | 0 | 0   | 0 | 0 | 0    | 0 | 0  | 28 |
| 554338  | 0 | 0   | 0 | 0 | 0    | 0 | 0  | 0  |
| 345575  | 0 | 0   | 0 | 0 | 0    | 0 | 0  | 0  |
| 173744  | 0 | 0   | 0 | 0 | 1888 | 0 | 0  | 0  |
| 128382  | 0 | 0   | 0 | 0 | 0    | 0 | 0  | 0  |
| 1058950 | 0 | 0   | 0 | 0 | 0    | 0 | 0  | 0  |
| 587269  | 0 | 281 | 0 | 0 | 0    | 0 | 0  | 5  |
| 342397  | 0 | 14  | 2 | 0 | 0    | 1 | 0  | 1  |



















|         |     |    |      |     |    |     |    |     |
|---------|-----|----|------|-----|----|-----|----|-----|
| 349024  | 0   | 0  | 1524 | 0   | 0  | 0   | 1  | 0   |
| 336632  | 0   | 94 | 0    | 179 | 0  | 0   | 0  | 74  |
| 348680  | 1   | 0  | 0    | 0   | 0  | 0   | 1  | 0   |
| 192625  | 0   | 0  | 0    | 0   | 0  | 0   | 0  | 0   |
| 185888  | 0   | 0  | 0    | 0   | 1  | 0   | 0  | 0   |
| 587530  | 0   | 33 | 0    | 0   | 0  | 2   | 0  | 0   |
| 499378  | 0   | 0  | 0    | 0   | 0  | 0   | 0  | 0   |
| 551822  | 0   | 73 | 0    | 0   | 0  | 1   | 0  | 0   |
| 1105343 | 0   | 0  | 0    | 0   | 0  | 0   | 0  | 0   |
| 4451251 | 115 | 0  | 0    | 0   | 0  | 0   | 0  | 0   |
| 1084865 | 4   | 1  | 8    | 0   | 10 | 0   | 11 | 0   |
| 102222  | 0   | 0  | 0    | 0   | 0  | 0   | 0  | 0   |
| 531436  | 0   | 0  | 0    | 0   | 0  | 0   | 0  | 0   |
| 346686  | 0   | 0  | 0    | 0   | 0  | 0   | 0  | 0   |
| 542096  | 0   | 0  | 0    | 0   | 0  | 0   | 0  | 0   |
| 255161  | 0   | 0  | 0    | 0   | 0  | 0   | 0  | 0   |
| 350865  | 0   | 0  | 0    | 0   | 0  | 0   | 0  | 0   |
| 920226  | 0   | 0  | 0    | 0   | 0  | 0   | 0  | 0   |
| 4337090 | 0   | 0  | 0    | 0   | 0  | 0   | 0  | 0   |
| 3272632 | 0   | 0  | 0    | 0   | 0  | 3   | 3  | 4   |
| 3172379 | 0   | 0  | 0    | 0   | 0  | 0   | 0  | 2   |
| 882921  | 0   | 0  | 0    | 0   | 0  | 0   | 0  | 0   |
| 564431  | 0   | 0  | 0    | 0   | 0  | 0   | 2  | 0   |
| 368099  | 0   | 0  | 0    | 405 | 1  | 713 | 0  | 761 |
| 540940  | 0   | 0  | 0    | 0   | 0  | 0   | 0  | 0   |
| 509416  | 0   | 0  | 0    | 0   | 0  | 0   | 0  | 0   |
| 368097  | 0   | 0  | 0    | 0   | 0  | 0   | 0  | 0   |
| 1017249 | 0   | 0  | 0    | 0   | 2  | 0   | 0  | 0   |
| 175485  | 0   | 0  | 0    | 0   | 1  | 0   | 1  | 0   |
| 584579  | 0   | 0  | 0    | 0   | 0  | 0   | 0  | 0   |
| 187782  | 0   | 0  | 0    | 0   | 0  | 0   | 0  | 0   |
| 4322712 | 0   | 0  | 0    | 0   | 0  | 0   | 1  | 0   |
| 4435664 | 0   | 0  | 0    | 0   | 0  | 0   | 0  | 0   |
| 837283  | 0   | 0  | 0    | 0   | 0  | 0   | 0  | 0   |
| 197708  | 0   | 0  | 0    | 0   | 0  | 0   | 0  | 0   |
| 163477  | 0   | 0  | 0    | 0   | 0  | 0   | 0  | 0   |
| 910272  | 0   | 0  | 0    | 0   | 0  | 0   | 0  | 0   |
| 572860  | 0   | 0  | 0    | 0   | 0  | 0   | 0  | 0   |
| 588197  | 26  | 0  | 0    | 0   | 0  | 0   | 2  | 0   |
| 1000269 | 0   | 0  | 0    | 0   | 0  | 0   | 0  | 0   |
| 584375  | 0   | 0  | 1    | 4   | 4  | 1   | 0  | 0   |
| 4416113 | 0   | 0  | 0    | 0   | 0  | 0   | 0  | 0   |
| 109591  | 0   | 0  | 0    | 0   | 0  | 0   | 1  | 0   |
| 183480  | 0   | 0  | 0    | 0   | 0  | 0   | 0  | 0   |
| 815573  | 0   | 0  | 0    | 0   | 0  | 0   | 0  | 0   |
| 3252211 | 0   | 0  | 0    | 0   | 0  | 0   | 0  | 0   |
| 191273  | 0   | 0  | 0    | 0   | 0  | 0   | 0  | 0   |
| 4352233 | 0   | 0  | 0    | 0   | 0  | 0   | 0  | 0   |
| 984924  | 0   | 0  | 0    | 0   | 0  | 0   | 0  | 0   |
| 1106324 | 0   | 0  | 0    | 0   | 0  | 0   | 0  | 0   |
| 434651  | 0   | 0  | 0    | 0   | 0  | 0   | 0  | 0   |
| 4316928 | 9   | 0  | 0    | 0   | 0  | 1   | 1  | 0   |
| 343569  | 0   | 0  | 0    | 0   | 0  | 0   | 0  | 0   |
| 184209  | 0   | 0  | 0    | 1   | 0  | 0   | 0  | 1   |
| 851323  | 0   | 0  | 24   | 0   | 41 | 0   | 0  | 0   |
| 556126  | 0   | 0  | 0    | 1   | 0  | 0   | 0  | 0   |





|         |    |     |    |     |     |      |     |     |
|---------|----|-----|----|-----|-----|------|-----|-----|
| 392887  | 0  | 0   | 0  | 0   | 0   | 0    | 0   | 0   |
| 223097  | 0  | 0   | 0  | 0   | 0   | 0    | 0   | 0   |
| 952003  | 0  | 0   | 0  | 0   | 0   | 0    | 0   | 0   |
| 1101669 | 0  | 0   | 0  | 0   | 0   | 0    | 0   | 0   |
| 259772  | 0  | 940 | 0  | 0   | 0   | 54   | 1   | 15  |
| 828483  | 1  | 0   | 0  | 0   | 0   | 0    | 0   | 0   |
| 195769  | 0  | 0   | 71 | 0   | 0   | 0    | 0   | 0   |
| 3680006 | 0  | 0   | 0  | 0   | 0   | 0    | 0   | 0   |
| 561607  | 0  | 39  | 0  | 0   | 0   | 0    | 0   | 0   |
| 2104368 | 0  | 0   | 0  | 2   | 0   | 0    | 0   | 0   |
| 503174  | 0  | 0   | 0  | 0   | 0   | 0    | 0   | 0   |
| 553611  | 15 | 1   | 25 | 541 | 402 | 1302 | 0   | 0   |
| 262095  | 0  | 74  | 0  | 0   | 0   | 13   | 375 | 65  |
| 4315660 | 0  | 0   | 0  | 0   | 0   | 0    | 0   | 0   |
| 348027  | 0  | 0   | 0  | 0   | 0   | 1    | 0   | 0   |
| 241415  | 0  | 0   | 0  | 0   | 0   | 0    | 0   | 0   |
| 297182  | 0  | 0   | 0  | 0   | 0   | 0    | 0   | 0   |
| 366068  | 0  | 0   | 0  | 0   | 0   | 0    | 0   | 0   |
| 4346374 | 0  | 0   | 0  | 0   | 0   | 0    | 0   | 0   |
| 581021  | 0  | 0   | 0  | 0   | 0   | 0    | 0   | 0   |
| 336559  | 0  | 0   | 0  | 0   | 0   | 0    | 0   | 0   |
| 1005533 | 0  | 0   | 0  | 0   | 0   | 0    | 0   | 0   |
| 1065974 | 0  | 0   | 0  | 0   | 0   | 1    | 0   | 0   |
| 1078587 | 0  | 0   | 6  | 0   | 0   | 0    | 0   | 0   |
| 193480  | 0  | 0   | 0  | 0   | 0   | 0    | 0   | 0   |
| 2549971 | 0  | 0   | 0  | 0   | 0   | 0    | 0   | 0   |
| 362765  | 0  | 0   | 0  | 0   | 0   | 0    | 0   | 0   |
| 1024093 | 10 | 0   | 0  | 0   | 0   | 0    | 0   | 0   |
| 432284  | 0  | 0   | 0  | 0   | 0   | 0    | 0   | 0   |
| 1062224 | 0  | 0   | 0  | 0   | 0   | 0    | 0   | 0   |
| 509047  | 0  | 0   | 0  | 0   | 0   | 0    | 0   | 0   |
| 572750  | 0  | 4   | 4  | 0   | 1   | 1    | 6   | 0   |
| 4347159 | 2  | 0   | 21 | 12  | 13  | 3    | 0   | 0   |
| 294618  | 4  | 0   | 0  | 0   | 0   | 2    | 0   | 1   |
| 256232  | 0  | 0   | 0  | 0   | 0   | 0    | 0   | 0   |
| 553981  | 0  | 0   | 0  | 0   | 0   | 0    | 0   | 0   |
| 633252  | 0  | 0   | 0  | 0   | 0   | 0    | 0   | 0   |
| 2208658 | 0  | 0   | 0  | 0   | 0   | 0    | 0   | 0   |
| 3384047 | 0  | 0   | 0  | 0   | 0   | 0    | 0   | 0   |
| 4481613 | 0  | 0   | 0  | 0   | 0   | 0    | 0   | 0   |
| 4391230 | 0  | 0   | 0  | 0   | 0   | 0    | 0   | 0   |
| 362568  | 0  | 0   | 1  | 0   | 0   | 0    | 0   | 0   |
| 1066410 | 0  | 0   | 0  | 0   | 0   | 0    | 0   | 0   |
| 1097593 | 0  | 0   | 0  | 0   | 0   | 0    | 0   | 0   |
| 346085  | 0  | 0   | 0  | 0   | 0   | 0    | 0   | 0   |
| 167950  | 0  | 0   | 0  | 0   | 0   | 0    | 0   | 0   |
| 4446317 | 0  | 0   | 0  | 0   | 0   | 0    | 0   | 0   |
| 679245  | 0  | 0   | 18 | 1   | 38  | 0    | 31  | 50  |
| 495070  | 7  | 0   | 0  | 0   | 0   | 0    | 0   | 0   |
| 325768  | 0  | 77  | 0  | 0   | 0   | 0    | 0   | 0   |
| 4318935 | 0  | 0   | 1  | 1   | 2   | 0    | 2   | 1   |
| 335701  | 0  | 0   | 0  | 0   | 0   | 0    | 0   | 1   |
| 4329571 | 0  | 0   | 0  | 0   | 0   | 0    | 0   | 0   |
| 195177  | 0  | 0   | 0  | 0   | 0   | 0    | 0   | 0   |
| 194360  | 0  | 0   | 0  | 0   | 0   | 0    | 0   | 255 |
| 1904497 | 0  | 5   | 0  | 0   | 0   | 0    | 0   | 0   |



|         |   |     |   |    |     |      |   |   |
|---------|---|-----|---|----|-----|------|---|---|
| 393051  | 0 | 0   | 0 | 0  | 0   | 0    | 0 | 0 |
| 849156  | 0 | 0   | 0 | 0  | 0   | 0    | 0 | 0 |
| 611914  | 0 | 0   | 0 | 0  | 0   | 0    | 0 | 0 |
| 4360055 | 0 | 0   | 0 | 0  | 0   | 0    | 1 | 0 |
| 566976  | 0 | 2   | 0 | 0  | 0   | 0    | 1 | 0 |
| 782953  | 1 | 1   | 3 | 0  | 0   | 1    | 0 | 0 |
| 196047  | 0 | 0   | 0 | 0  | 0   | 2    | 0 | 0 |
| 255928  | 0 | 0   | 0 | 0  | 0   | 0    | 0 | 0 |
| 589010  | 0 | 0   | 0 | 0  | 0   | 0    | 0 | 0 |
| 172586  | 0 | 0   | 0 | 0  | 1   | 0    | 0 | 0 |
| 593043  | 0 | 0   | 0 | 4  | 0   | 1111 | 0 | 8 |
| 189445  | 0 | 1   | 0 | 0  | 0   | 0    | 0 | 0 |
| 181336  | 0 | 0   | 0 | 0  | 0   | 0    | 0 | 0 |
| 686223  | 0 | 0   | 0 | 0  | 0   | 0    | 0 | 0 |
| 610462  | 0 | 0   | 0 | 0  | 0   | 0    | 0 | 0 |
| 328458  | 0 | 0   | 1 | 0  | 0   | 0    | 0 | 0 |
| 191251  | 0 | 0   | 0 | 0  | 0   | 0    | 0 | 0 |
| 566243  | 0 | 0   | 0 | 0  | 0   | 0    | 0 | 0 |
| 514523  | 0 | 0   | 0 | 0  | 0   | 0    | 0 | 0 |
| 1033413 | 0 | 0   | 0 | 0  | 0   | 0    | 0 | 0 |
| 4424598 | 0 | 0   | 0 | 0  | 0   | 0    | 0 | 0 |
| 994219  | 0 | 0   | 0 | 0  | 0   | 0    | 0 | 0 |
| 368849  | 0 | 0   | 0 | 0  | 0   | 0    | 1 | 0 |
| 2415144 | 0 | 0   | 0 | 3  | 0   | 1    | 1 | 1 |
| 3847840 | 0 | 0   | 0 | 0  | 0   | 0    | 0 | 0 |
| 571081  | 0 | 0   | 0 | 0  | 0   | 0    | 0 | 0 |
| 315429  | 0 | 0   | 0 | 0  | 0   | 0    | 0 | 0 |
| 128223  | 0 | 0   | 0 | 0  | 0   | 0    | 0 | 0 |
| 314095  | 0 | 0   | 0 | 0  | 0   | 0    | 0 | 0 |
| 192619  | 0 | 1   | 0 | 0  | 0   | 0    | 0 | 0 |
| 535196  | 0 | 0   | 0 | 0  | 0   | 0    | 0 | 0 |
| 369486  | 0 | 0   | 0 | 0  | 0   | 0    | 0 | 0 |
| 586387  | 0 | 0   | 0 | 0  | 0   | 0    | 0 | 0 |
| 196990  | 0 | 3   | 1 | 0  | 0   | 1    | 0 | 1 |
| 518389  | 0 | 0   | 0 | 0  | 0   | 0    | 0 | 0 |
| 193744  | 0 | 0   | 0 | 0  | 0   | 0    | 0 | 0 |
| 367456  | 0 | 0   | 2 | 0  | 0   | 0    | 0 | 0 |
| 537664  | 0 | 0   | 0 | 0  | 0   | 0    | 0 | 0 |
| 537661  | 0 | 0   | 0 | 0  | 0   | 0    | 0 | 0 |
| 311961  | 0 | 0   | 0 | 0  | 0   | 0    | 0 | 0 |
| 1143645 | 0 | 0   | 0 | 0  | 0   | 0    | 0 | 0 |
| 4306836 | 0 | 0   | 0 | 0  | 0   | 0    | 0 | 0 |
| 4359220 | 0 | 0   | 0 | 0  | 0   | 0    | 0 | 0 |
| 301253  | 0 | 0   | 0 | 0  | 0   | 0    | 5 | 0 |
| 572476  | 0 | 0   | 0 | 0  | 0   | 0    | 0 | 0 |
| 668514  | 0 | 1   | 1 | 0  | 1   | 0    | 2 | 3 |
| 1090306 | 0 | 0   | 0 | 0  | 0   | 0    | 0 | 0 |
| 4060124 | 0 | 0   | 0 | 1  | 0   | 1    | 3 | 1 |
| 363731  | 0 | 4   | 0 | 11 | 0   | 0    | 0 | 3 |
| 196731  | 0 | 0   | 0 | 0  | 0   | 0    | 0 | 0 |
| 4366391 | 0 | 3   | 0 | 0  | 0   | 0    | 0 | 0 |
| 138389  | 1 | 0   | 0 | 0  | 0   | 1    | 1 | 0 |
| 348304  | 0 | 0   | 0 | 0  | 0   | 0    | 1 | 0 |
| 570350  | 0 | 0   | 0 | 0  | 0   | 0    | 0 | 0 |
| 949304  | 0 | 0   | 0 | 0  | 0   | 0    | 0 | 0 |
| 535375  | 0 | 192 | 8 | 0  | 664 | 0    | 1 | 0 |

















|           |   |   |   |   |   |   |   |   |
|-----------|---|---|---|---|---|---|---|---|
| New.Clean | 0 | 0 | 0 | 0 | 0 | 0 | 0 | 0 |
| New.Clean | 0 | 0 | 0 | 0 | 0 | 0 | 0 | 3 |
| New.Clean | 0 | 0 | 0 | 1 | 1 | 0 | 0 | 0 |
| New.Clean | 0 | 0 | 0 | 0 | 0 | 0 | 0 | 0 |
| New.Clean | 0 | 0 | 0 | 0 | 0 | 0 | 0 | 0 |
| New.Clean | 0 | 0 | 0 | 0 | 0 | 0 | 0 | 0 |
| New.Clean | 0 | 0 | 2 | 1 | 0 | 1 | 0 | 0 |
| New.Clean | 0 | 0 | 0 | 0 | 0 | 0 | 0 | 0 |
| New.Clean | 0 | 0 | 0 | 0 | 0 | 0 | 0 | 0 |
| New.Clean | 0 | 0 | 0 | 0 | 2 | 0 | 0 | 0 |
| New.Clean | 0 | 0 | 0 | 0 | 0 | 0 | 0 | 0 |
| New.Clean | 0 | 0 | 0 | 0 | 0 | 0 | 0 | 0 |
| New.Clean | 0 | 0 | 0 | 0 | 0 | 0 | 0 | 0 |
| New.Clean | 0 | 0 | 0 | 0 | 0 | 0 | 0 | 0 |
| New.Clean | 0 | 0 | 0 | 0 | 0 | 0 | 0 | 0 |
| New.Clean | 0 | 0 | 0 | 0 | 0 | 0 | 0 | 0 |
| New.Clean | 0 | 0 | 0 | 0 | 1 | 0 | 0 | 0 |
| New.Clean | 0 | 0 | 0 | 0 | 0 | 0 | 0 | 0 |
| New.Clean | 0 | 0 | 0 | 0 | 0 | 2 | 0 | 0 |
| New.Clean | 0 | 0 | 0 | 0 | 0 | 0 | 0 | 0 |
| New.Clean | 0 | 0 | 0 | 0 | 0 | 0 | 0 | 0 |
| New.Clean | 0 | 0 | 0 | 0 | 0 | 0 | 1 | 0 |
| New.Clean | 0 | 0 | 0 | 0 | 0 | 0 | 0 | 0 |
| New.Clean | 0 | 0 | 0 | 0 | 0 | 0 | 0 | 0 |
| New.Clean | 0 | 0 | 0 | 0 | 0 | 0 | 0 | 0 |
| New.Clean | 0 | 0 | 2 | 0 | 0 | 0 | 0 | 0 |
| New.Clean | 0 | 0 | 0 | 0 | 0 | 0 | 0 | 0 |
| New.Clean | 0 | 0 | 0 | 0 | 0 | 0 | 0 | 0 |
| New.Clean | 0 | 0 | 0 | 0 | 0 | 0 | 0 | 0 |
| New.Clean | 0 | 0 | 0 | 0 | 0 | 0 | 0 | 0 |
| New.Clean | 0 | 0 | 0 | 0 | 0 | 0 | 0 | 0 |
| New.Clean | 0 | 0 | 0 | 0 | 0 | 0 | 0 | 0 |
| New.Clean | 0 | 0 | 0 | 0 | 0 | 0 | 0 | 0 |
| New.Clean | 0 | 0 | 0 | 0 | 0 | 0 | 1 | 0 |
| New.Clean | 0 | 0 | 0 | 0 | 0 | 0 | 0 | 0 |
| New.Clean | 0 | 0 | 0 | 0 | 0 | 0 | 0 | 0 |
| New.Clean | 0 | 0 | 0 | 0 | 0 | 0 | 0 | 0 |
| New.Clean | 0 | 0 | 0 | 0 | 0 | 0 | 0 | 0 |
| New.Clean | 0 | 0 | 0 | 0 | 0 | 0 | 0 | 0 |
| New.Clean | 0 | 0 | 0 | 0 | 0 | 0 | 0 | 0 |
| New.Clean | 0 | 0 | 0 | 0 | 0 | 0 | 0 | 0 |
| New.Clean | 0 | 0 | 0 | 0 | 0 | 0 | 0 | 0 |
| New.Clean | 0 | 0 | 0 | 0 | 0 | 0 | 0 | 0 |
| New.Clean | 0 | 0 | 0 | 0 | 0 | 0 | 0 | 0 |
| New.Clean | 0 | 0 | 0 | 0 | 0 | 0 | 0 | 0 |
| New.Clean | 0 | 0 | 0 | 0 | 0 | 0 | 0 | 0 |
| New.Clean | 0 | 0 | 0 | 0 | 0 | 0 | 0 | 0 |
| New.Clean | 0 | 0 | 0 | 0 | 0 | 0 | 0 | 0 |
| New.Clean | 0 | 0 | 0 | 0 | 0 | 0 | 0 | 0 |
| New.Clean | 2 | 0 | 0 | 0 | 0 | 0 | 0 | 0 |
| New.Clean | 0 | 0 | 0 | 0 | 0 | 0 | 0 | 0 |
| New.Clean | 0 | 0 | 0 | 0 | 0 | 0 | 0 | 0 |





















|           |   |   |   |   |   |   |   |   |
|-----------|---|---|---|---|---|---|---|---|
| New.Clean | 0 | 0 | 0 | 0 | 0 | 0 | 0 | 0 |
| New.Clean | 0 | 0 | 0 | 0 | 0 | 0 | 0 | 0 |
| New.Clean | 0 | 0 | 0 | 0 | 0 | 0 | 0 | 0 |
| New.Clean | 0 | 0 | 0 | 0 | 0 | 0 | 0 | 0 |
| New.Clean | 0 | 0 | 0 | 0 | 0 | 0 | 0 | 0 |
| New.Clean | 0 | 0 | 1 | 0 | 0 | 1 | 0 | 0 |
| New.Clean | 0 | 0 | 0 | 0 | 0 | 0 | 0 | 0 |
| New.Clean | 0 | 0 | 0 | 0 | 0 | 0 | 0 | 0 |
| New.Clean | 0 | 0 | 0 | 0 | 0 | 0 | 0 | 0 |
| New.Clean | 0 | 0 | 0 | 0 | 0 | 0 | 0 | 0 |
| New.Clean | 0 | 0 | 0 | 0 | 0 | 0 | 0 | 0 |
| New.Clean | 0 | 0 | 0 | 0 | 0 | 0 | 0 | 0 |
| New.Clean | 0 | 0 | 0 | 0 | 0 | 0 | 0 | 0 |
| New.Clean | 0 | 0 | 0 | 0 | 0 | 0 | 0 | 0 |
| New.Clean | 0 | 0 | 0 | 0 | 0 | 0 | 0 | 0 |
| New.Clean | 0 | 0 | 0 | 0 | 0 | 0 | 0 | 0 |
| New.Clean | 0 | 0 | 0 | 0 | 2 | 0 | 0 | 0 |
| New.Clean | 0 | 0 | 0 | 0 | 0 | 0 | 0 | 0 |
| New.Clean | 0 | 0 | 0 | 0 | 0 | 0 | 0 | 0 |
| New.Clean | 0 | 0 | 1 | 0 | 0 | 0 | 0 | 0 |
| New.Clean | 0 | 0 | 0 | 0 | 0 | 0 | 0 | 0 |
| New.Clean | 0 | 0 | 0 | 0 | 0 | 0 | 0 | 0 |
| New.Clean | 0 | 0 | 0 | 0 | 0 | 0 | 0 | 0 |
| New.Clean | 0 | 0 | 0 | 0 | 0 | 0 | 0 | 0 |
| New.Clean | 0 | 0 | 0 | 0 | 0 | 0 | 0 | 0 |
| New.Clean | 0 | 0 | 0 | 0 | 0 | 0 | 0 | 0 |
| New.Clean | 0 | 0 | 0 | 0 | 0 | 0 | 0 | 0 |
| New.Clean | 0 | 0 | 0 | 0 | 0 | 0 | 0 | 0 |
| New.Clean | 0 | 0 | 0 | 0 | 1 | 0 | 0 | 0 |
| New.Clean | 0 | 0 | 0 | 0 | 0 | 0 | 0 | 0 |
| New.Clean | 0 | 0 | 0 | 0 | 0 | 0 | 0 | 0 |
| New.Clean | 0 | 0 | 0 | 0 | 0 | 0 | 0 | 0 |
| New.Clean | 0 | 0 | 0 | 0 | 0 | 1 | 0 | 0 |
| New.Clean | 0 | 1 | 0 | 0 | 0 | 0 | 0 | 1 |
| New.Clean | 0 | 0 | 0 | 0 | 0 | 0 | 0 | 0 |
| New.Clean | 0 | 0 | 0 | 0 | 0 | 0 | 0 | 0 |
| New.Clean | 0 | 0 | 0 | 0 | 0 | 1 | 0 | 0 |
| New.Clean | 0 | 0 | 0 | 0 | 0 | 0 | 0 | 0 |
| New.Clean | 0 | 3 | 0 | 0 | 0 | 0 | 0 | 0 |
| New.Clean | 0 | 0 | 0 | 0 | 0 | 0 | 0 | 0 |
| New.Clean | 0 | 0 | 0 | 0 | 0 | 0 | 0 | 0 |
| New.Clean | 0 | 0 | 0 | 0 | 0 | 0 | 0 | 3 |
| New.Clean | 0 | 0 | 0 | 0 | 0 | 0 | 0 | 0 |
| New.Clean | 0 | 0 | 0 | 0 | 0 | 2 | 0 | 0 |
| New.Clean | 0 | 0 | 0 | 0 | 0 | 0 | 0 | 0 |
| New.Clean | 0 | 0 | 0 | 0 | 0 | 0 | 0 | 1 |
| New.Clean | 0 | 0 | 0 | 0 | 0 | 0 | 0 | 0 |
| New.Clean | 0 | 0 | 0 | 0 | 0 | 0 | 0 | 0 |
| New.Clean | 0 | 0 | 0 | 0 | 0 | 0 | 0 | 0 |
| New.Clean | 0 | 0 | 0 | 0 | 0 | 0 | 0 | 0 |
| New.Clean | 0 | 0 | 0 | 0 | 0 | 0 | 0 | 0 |
| New.Clean | 2 | 0 | 0 | 0 | 0 | 0 | 0 | 0 |
| New.Clean | 0 | 0 | 0 | 0 | 0 | 0 | 0 | 0 |
| New.Clean | 0 | 0 | 0 | 0 | 0 | 0 | 0 | 0 |
| New.Clean | 0 | 0 | 0 | 0 | 0 | 0 | 0 | 0 |
| New.Clean | 1 | 1 | 0 | 0 | 0 | 1 | 0 | 0 |
| New.Clean | 0 | 0 | 5 | 0 | 0 | 0 | 0 | 0 |

|           |   |   |   |   |   |   |   |   |
|-----------|---|---|---|---|---|---|---|---|
| New.Clean | 0 | 0 | 0 | 0 | 0 | 0 | 0 | 0 |
| New.Clean | 0 | 0 | 0 | 0 | 0 | 0 | 0 | 0 |
| New.Clean | 0 | 0 | 0 | 0 | 0 | 0 | 0 | 0 |
| New.Clean | 0 | 0 | 0 | 0 | 0 | 0 | 1 | 0 |
| New.Clean | 0 | 0 | 0 | 0 | 0 | 0 | 0 | 0 |
| New.Clean | 0 | 0 | 0 | 0 | 0 | 0 | 0 | 0 |
| New.Clean | 0 | 0 | 0 | 0 | 0 | 0 | 1 | 0 |
| New.Clean | 0 | 0 | 0 | 0 | 1 | 0 | 0 | 1 |
| New.Clean | 0 | 0 | 0 | 0 | 0 | 0 | 0 | 0 |
| New.Clean | 0 | 0 | 0 | 0 | 0 | 0 | 0 | 0 |
| New.Clean | 0 | 0 | 0 | 0 | 0 | 0 | 0 | 0 |
| New.Clean | 0 | 0 | 0 | 0 | 0 | 0 | 0 | 0 |
| New.Clean | 0 | 1 | 0 | 0 | 0 | 0 | 7 | 1 |
| New.Clean | 0 | 0 | 0 | 0 | 0 | 0 | 0 | 0 |
| New.Clean | 0 | 1 | 0 | 0 | 0 | 0 | 0 | 0 |
| New.Clean | 0 | 0 | 0 | 0 | 0 | 0 | 0 | 0 |
| New.Clean | 0 | 0 | 0 | 0 | 0 | 2 | 0 | 4 |
| New.Clean | 0 | 0 | 0 | 0 | 0 | 0 | 0 | 0 |
| New.Clean | 0 | 0 | 0 | 0 | 0 | 0 | 0 | 0 |
| New.Clean | 0 | 0 | 0 | 0 | 0 | 0 | 1 | 0 |
| New.Clean | 0 | 0 | 0 | 0 | 0 | 0 | 0 | 0 |
| New.Clean | 0 | 0 | 0 | 0 | 0 | 0 | 0 | 0 |
| New.Clean | 0 | 0 | 0 | 0 | 0 | 0 | 0 | 0 |
| New.Clean | 0 | 0 | 0 | 0 | 0 | 0 | 0 | 0 |
| New.Clean | 0 | 0 | 0 | 0 | 0 | 0 | 0 | 0 |
| New.Clean | 0 | 0 | 0 | 0 | 0 | 0 | 0 | 0 |
| New.Clean | 0 | 0 | 0 | 0 | 0 | 0 | 0 | 0 |
| New.Clean | 0 | 0 | 0 | 0 | 0 | 0 | 0 | 0 |
| New.Clean | 0 | 0 | 0 | 0 | 0 | 0 | 0 | 0 |
| New.Clean | 0 | 0 | 0 | 0 | 1 | 0 | 0 | 0 |
| New.Clean | 0 | 6 | 0 | 0 | 0 | 1 | 0 | 0 |
| New.Clean | 0 | 0 | 0 | 0 | 0 | 0 | 0 | 0 |
| New.Clean | 0 | 0 | 0 | 0 | 0 | 0 | 0 | 0 |
| New.Clean | 0 | 0 | 0 | 0 | 0 | 0 | 0 | 0 |
| New.Clean | 0 | 0 | 0 | 0 | 0 | 0 | 0 | 0 |
| New.Clean | 0 | 0 | 0 | 0 | 0 | 0 | 0 | 0 |
| New.Clean | 0 | 0 | 0 | 0 | 0 | 0 | 0 | 0 |
| New.Clean | 0 | 1 | 0 | 0 | 0 | 0 | 0 | 0 |
| New.Clean | 0 | 0 | 1 | 0 | 0 | 3 | 0 | 0 |
| New.Clean | 0 | 0 | 0 | 0 | 0 | 0 | 0 | 0 |
| New.Clean | 0 | 0 | 0 | 0 | 0 | 1 | 0 | 0 |
| New.Clean | 2 | 0 | 0 | 0 | 0 | 0 | 0 | 0 |
| New.Clean | 0 | 0 | 4 | 0 | 0 | 0 | 0 | 0 |
| New.Clean | 0 | 0 | 0 | 0 | 0 | 0 | 0 | 0 |
| New.Clean | 0 | 0 | 0 | 0 | 0 | 0 | 0 | 0 |
| New.Clean | 0 | 0 | 0 | 0 | 0 | 0 | 0 | 0 |
| New.Clean | 0 | 0 | 0 | 0 | 0 | 0 | 0 | 0 |
| New.Clean | 0 | 0 | 0 | 0 | 0 | 0 | 0 | 0 |
| New.Clean | 0 | 0 | 0 | 0 | 0 | 0 | 0 | 0 |
| New.Clean | 0 | 0 | 0 | 0 | 0 | 0 | 0 | 0 |
| New.Clean | 0 | 0 | 0 | 0 | 0 | 0 | 0 | 0 |
| New.Clean | 0 | 0 | 0 | 0 | 0 | 0 | 0 | 0 |
| New.Clean | 0 | 0 | 0 | 0 | 0 | 0 | 0 | 0 |
| New.Clean | 0 | 0 | 0 | 0 | 0 | 0 | 0 | 0 |
| New.Clean | 0 | 0 | 0 | 0 | 0 | 0 | 0 | 0 |
| New.Clean | 0 | 0 | 0 | 0 | 0 | 0 | 0 | 0 |
| New.Clean | 0 | 0 | 0 | 0 | 3 | 0 | 0 | 0 |
| New.Clean | 0 | 0 | 0 | 0 | 0 | 0 | 0 | 2 |
| New.Clean | 0 | 0 | 0 | 0 | 0 | 0 | 0 | 0 |









|           |   |   |   |   |   |   |    |   |
|-----------|---|---|---|---|---|---|----|---|
| New.Clean | 0 | 0 | 0 | 0 | 0 | 0 | 0  | 0 |
| New.Clean | 0 | 0 | 0 | 0 | 0 | 0 | 0  | 0 |
| New.Clean | 0 | 0 | 0 | 0 | 0 | 0 | 0  | 0 |
| New.Clean | 0 | 0 | 0 | 0 | 0 | 0 | 0  | 0 |
| New.Clean | 0 | 0 | 0 | 0 | 0 | 0 | 0  | 0 |
| New.Clean | 0 | 0 | 0 | 0 | 0 | 0 | 0  | 0 |
| New.Clean | 0 | 0 | 0 | 0 | 0 | 0 | 0  | 0 |
| New.Clean | 0 | 1 | 0 | 0 | 0 | 0 | 0  | 0 |
| New.Clean | 0 | 0 | 0 | 0 | 0 | 0 | 0  | 0 |
| New.Clean | 0 | 0 | 0 | 0 | 0 | 0 | 0  | 0 |
| New.Clean | 0 | 0 | 0 | 0 | 0 | 3 | 0  | 0 |
| New.Clean | 0 | 0 | 0 | 0 | 0 | 0 | 0  | 0 |
| New.Clean | 0 | 5 | 0 | 0 | 0 | 0 | 0  | 0 |
| New.Clean | 0 | 6 | 0 | 0 | 0 | 0 | 0  | 0 |
| New.Clean | 0 | 0 | 0 | 0 | 0 | 0 | 0  | 0 |
| New.Clean | 0 | 0 | 0 | 0 | 0 | 0 | 0  | 0 |
| New.Clean | 0 | 0 | 1 | 0 | 0 | 0 | 0  | 0 |
| New.Clean | 0 | 0 | 0 | 0 | 0 | 0 | 0  | 0 |
| New.Clean | 0 | 0 | 0 | 0 | 0 | 0 | 0  | 0 |
| New.Clean | 0 | 0 | 0 | 0 | 0 | 0 | 0  | 0 |
| New.Clean | 0 | 0 | 0 | 0 | 0 | 0 | 0  | 0 |
| New.Clean | 0 | 0 | 0 | 0 | 0 | 0 | 0  | 0 |
| New.Clean | 0 | 0 | 0 | 0 | 0 | 0 | 1  | 0 |
| New.Clean | 0 | 0 | 0 | 0 | 0 | 0 | 0  | 0 |
| New.Clean | 0 | 0 | 0 | 0 | 0 | 0 | 0  | 0 |
| New.Clean | 0 | 0 | 0 | 0 | 0 | 0 | 0  | 0 |
| New.Clean | 0 | 0 | 0 | 0 | 0 | 0 | 0  | 0 |
| New.Clean | 0 | 0 | 0 | 0 | 0 | 0 | 0  | 0 |
| New.Clean | 0 | 2 | 0 | 0 | 0 | 1 | 0  | 0 |
| New.Clean | 0 | 0 | 0 | 0 | 0 | 0 | 0  | 0 |
| New.Clean | 0 | 0 | 0 | 2 | 0 | 0 | 0  | 0 |
| New.Clean | 0 | 0 | 2 | 0 | 1 | 0 | 2  | 0 |
| New.Clean | 0 | 0 | 0 | 0 | 0 | 0 | 0  | 0 |
| New.Clean | 0 | 1 | 0 | 0 | 0 | 0 | 0  | 0 |
| New.Clean | 0 | 0 | 0 | 0 | 0 | 0 | 1  | 0 |
| New.Clean | 0 | 0 | 0 | 0 | 0 | 0 | 0  | 0 |
| New.Clean | 0 | 0 | 0 | 0 | 0 | 0 | 0  | 0 |
| New.Clean | 0 | 0 | 0 | 0 | 0 | 0 | 0  | 0 |
| New.Clean | 0 | 0 | 0 | 0 | 0 | 0 | 0  | 0 |
| New.Clean | 0 | 0 | 0 | 0 | 2 | 0 | 0  | 0 |
| New.Clean | 0 | 3 | 0 | 0 | 0 | 1 | 0  | 0 |
| New.Clean | 0 | 0 | 1 | 0 | 1 | 0 | 0  | 0 |
| New.Clean | 0 | 0 | 0 | 0 | 0 | 0 | 0  | 0 |
| New.Clean | 0 | 0 | 0 | 0 | 0 | 1 | 0  | 1 |
| New.Clean | 0 | 0 | 0 | 0 | 0 | 0 | 0  | 0 |
| New.Clean | 0 | 0 | 0 | 0 | 0 | 0 | 0  | 0 |
| New.Clean | 0 | 0 | 0 | 0 | 0 | 2 | 0  | 0 |
| New.Clean | 0 | 0 | 2 | 0 | 0 | 0 | 0  | 0 |
| New.Clean | 0 | 0 | 0 | 0 | 0 | 0 | 0  | 0 |
| New.Clean | 0 | 1 | 0 | 0 | 0 | 0 | 0  | 0 |
| New.Clean | 0 | 0 | 0 | 0 | 0 | 0 | 0  | 0 |
| New.Clean | 0 | 0 | 0 | 0 | 0 | 0 | 0  | 0 |
| New.Clean | 0 | 0 | 0 | 0 | 1 | 0 | 13 | 0 |
| New.Clean | 0 | 1 | 0 | 0 | 0 | 0 | 0  | 0 |
| New.Clean | 9 | 0 | 0 | 0 | 0 | 0 | 0  | 0 |
| New.Clean | 0 | 5 | 0 | 0 | 0 | 0 | 0  | 0 |

|           |   |   |    |   |   |   |   |   |
|-----------|---|---|----|---|---|---|---|---|
| New.Clean | 0 | 0 | 0  | 0 | 0 | 0 | 0 | 0 |
| New.Clean | 0 | 0 | 0  | 0 | 0 | 0 | 0 | 0 |
| New.Clean | 0 | 0 | 0  | 0 | 0 | 0 | 0 | 0 |
| New.Clean | 0 | 0 | 0  | 0 | 0 | 0 | 0 | 0 |
| New.Clean | 0 | 0 | 0  | 0 | 0 | 0 | 0 | 0 |
| New.Clean | 0 | 0 | 0  | 0 | 0 | 0 | 0 | 0 |
| New.Clean | 0 | 0 | 0  | 0 | 0 | 0 | 0 | 0 |
| New.Clean | 0 | 0 | 0  | 0 | 0 | 0 | 0 | 0 |
| New.Clean | 0 | 0 | 2  | 0 | 0 | 0 | 0 | 0 |
| New.Clean | 0 | 0 | 0  | 0 | 0 | 0 | 0 | 0 |
| New.Clean | 0 | 0 | 0  | 1 | 0 | 0 | 0 | 0 |
| New.Clean | 0 | 0 | 0  | 0 | 0 | 0 | 0 | 0 |
| New.Clean | 0 | 0 | 1  | 0 | 1 | 0 | 0 | 0 |
| New.Clean | 0 | 0 | 0  | 0 | 0 | 0 | 0 | 0 |
| New.Clean | 0 | 0 | 0  | 0 | 0 | 0 | 0 | 0 |
| New.Clean | 0 | 0 | 0  | 0 | 0 | 0 | 2 | 0 |
| New.Clean | 0 | 0 | 0  | 0 | 0 | 0 | 0 | 0 |
| New.Clean | 0 | 0 | 0  | 0 | 0 | 0 | 0 | 0 |
| New.Clean | 0 | 0 | 0  | 0 | 0 | 0 | 0 | 0 |
| New.Clean | 0 | 0 | 0  | 0 | 0 | 0 | 0 | 0 |
| New.Clean | 0 | 2 | 0  | 0 | 0 | 0 | 0 | 0 |
| New.Clean | 0 | 0 | 0  | 0 | 0 | 0 | 0 | 0 |
| New.Clean | 0 | 0 | 1  | 0 | 0 | 0 | 0 | 0 |
| New.Clean | 0 | 0 | 0  | 0 | 0 | 0 | 0 | 0 |
| New.Clean | 0 | 0 | 0  | 0 | 0 | 0 | 0 | 0 |
| New.Clean | 0 | 0 | 0  | 0 | 0 | 0 | 0 | 2 |
| New.Clean | 0 | 0 | 0  | 0 | 0 | 0 | 0 | 0 |
| New.Clean | 0 | 0 | 0  | 0 | 0 | 0 | 0 | 0 |
| New.Clean | 0 | 0 | 0  | 0 | 0 | 0 | 0 | 0 |
| New.Clean | 0 | 0 | 0  | 0 | 0 | 0 | 0 | 0 |
| New.Clean | 0 | 0 | 0  | 0 | 0 | 0 | 0 | 0 |
| New.Clean | 0 | 0 | 0  | 0 | 0 | 0 | 0 | 0 |
| New.Clean | 0 | 0 | 0  | 0 | 0 | 0 | 0 | 0 |
| New.Clean | 0 | 0 | 0  | 0 | 0 | 0 | 0 | 0 |
| New.Clean | 0 | 0 | 0  | 0 | 0 | 0 | 0 | 0 |
| New.Clean | 0 | 0 | 12 | 0 | 0 | 0 | 0 | 0 |
| New.Clean | 0 | 0 | 0  | 0 | 0 | 0 | 0 | 0 |
| New.Clean | 0 | 0 | 0  | 0 | 0 | 0 | 0 | 0 |
| New.Clean | 0 | 0 | 0  | 0 | 0 | 1 | 0 | 0 |
| New.Clean | 0 | 0 | 0  | 0 | 0 | 0 | 0 | 0 |
| New.Clean | 0 | 0 | 0  | 0 | 1 | 0 | 0 | 0 |
| New.Clean | 0 | 0 | 0  | 0 | 0 | 0 | 0 | 0 |
| New.Clean | 0 | 0 | 10 | 0 | 0 | 0 | 0 | 0 |
| New.Clean | 0 | 0 | 0  | 0 | 0 | 0 | 0 | 0 |
| New.Clean | 0 | 0 | 0  | 1 | 0 | 0 | 0 | 0 |
| New.Clean | 0 | 0 | 0  | 0 | 0 | 0 | 0 | 0 |
| New.Clean | 0 | 0 | 0  | 0 | 0 | 0 | 0 | 0 |
| New.Clean | 0 | 0 | 4  | 0 | 0 | 0 | 0 | 0 |
| New.Clean | 0 | 0 | 0  | 0 | 0 | 1 | 1 | 0 |
| New.Clean | 2 | 0 | 0  | 0 | 0 | 0 | 0 | 0 |
| New.Clean | 0 | 0 | 0  | 0 | 0 | 0 | 0 | 0 |
| New.Clean | 0 | 0 | 0  | 0 | 0 | 0 | 0 | 0 |
| New.Clean | 0 | 1 | 0  | 0 | 0 | 0 | 0 | 0 |
| New.Clean | 0 | 0 | 0  | 0 | 0 | 0 | 0 | 0 |
| New.Clean | 0 | 0 | 0  | 0 | 0 | 0 | 0 | 0 |
| New.Clean | 0 | 0 | 0  | 0 | 0 | 0 | 0 | 0 |
| New.Clean | 0 | 0 | 0  | 0 | 0 | 1 | 0 | 0 |
| New.Clean | 0 | 0 | 0  | 0 | 0 | 0 | 1 | 0 |
| New.Clean | 0 | 0 | 0  | 0 | 0 | 0 | 0 | 0 |











|           |   |   |    |   |    |   |   |   |
|-----------|---|---|----|---|----|---|---|---|
| New.Clean | 0 | 0 | 0  | 0 | 0  | 0 | 0 | 8 |
| New.Clean | 0 | 0 | 3  | 0 | 0  | 0 | 0 | 0 |
| New.Clean | 0 | 0 | 3  | 0 | 0  | 0 | 0 | 0 |
| New.Clean | 0 | 0 | 0  | 0 | 0  | 0 | 0 | 0 |
| New.Clean | 0 | 1 | 0  | 0 | 0  | 0 | 0 | 0 |
| New.Clean | 0 | 0 | 0  | 0 | 0  | 0 | 0 | 0 |
| New.Clean | 0 | 0 | 0  | 0 | 0  | 0 | 0 | 0 |
| New.Clean | 0 | 0 | 0  | 0 | 0  | 0 | 0 | 0 |
| New.Clean | 0 | 0 | 0  | 0 | 0  | 0 | 0 | 0 |
| New.Clean | 0 | 0 | 0  | 0 | 0  | 0 | 0 | 0 |
| New.Clean | 0 | 2 | 0  | 0 | 0  | 0 | 0 | 0 |
| New.Clean | 0 | 0 | 0  | 0 | 0  | 0 | 0 | 0 |
| New.Clean | 0 | 0 | 0  | 0 | 0  | 0 | 0 | 0 |
| New.Clean | 0 | 1 | 0  | 0 | 0  | 0 | 0 | 0 |
| New.Clean | 0 | 0 | 0  | 0 | 0  | 0 | 0 | 0 |
| New.Clean | 0 | 0 | 0  | 0 | 0  | 0 | 0 | 0 |
| New.Clean | 0 | 0 | 0  | 0 | 2  | 1 | 0 | 0 |
| New.Clean | 0 | 0 | 0  | 0 | 0  | 0 | 0 | 0 |
| New.Clean | 0 | 0 | 0  | 0 | 0  | 0 | 0 | 0 |
| New.Clean | 0 | 0 | 0  | 0 | 0  | 0 | 0 | 0 |
| New.Clean | 0 | 0 | 0  | 0 | 0  | 0 | 0 | 0 |
| New.Clean | 0 | 0 | 0  | 0 | 0  | 0 | 0 | 0 |
| New.Clean | 0 | 0 | 0  | 0 | 0  | 0 | 0 | 0 |
| New.Clean | 0 | 0 | 1  | 0 | 0  | 0 | 0 | 0 |
| New.Clean | 0 | 0 | 0  | 0 | 0  | 0 | 0 | 0 |
| New.Clean | 0 | 0 | 0  | 0 | 0  | 0 | 0 | 0 |
| New.Clean | 0 | 3 | 0  | 0 | 0  | 0 | 0 | 0 |
| New.Clean | 0 | 0 | 0  | 0 | 0  | 0 | 0 | 0 |
| New.Clean | 0 | 0 | 0  | 0 | 0  | 0 | 0 | 0 |
| New.Clean | 0 | 0 | 0  | 0 | 0  | 0 | 0 | 0 |
| New.Clean | 0 | 0 | 0  | 0 | 0  | 0 | 0 | 0 |
| New.Clean | 0 | 0 | 0  | 0 | 0  | 1 | 0 | 0 |
| New.Clean | 0 | 0 | 0  | 0 | 0  | 0 | 0 | 0 |
| New.Clean | 0 | 0 | 0  | 0 | 0  | 0 | 0 | 0 |
| New.Clean | 0 | 0 | 0  | 0 | 0  | 0 | 0 | 0 |
| New.Clean | 0 | 0 | 0  | 0 | 0  | 0 | 0 | 0 |
| New.Clean | 0 | 0 | 0  | 0 | 15 | 0 | 0 | 0 |
| New.Clean | 0 | 0 | 0  | 0 | 0  | 0 | 0 | 0 |
| New.Clean | 0 | 0 | 0  | 0 | 0  | 0 | 0 | 0 |
| New.Clean | 0 | 0 | 0  | 0 | 0  | 0 | 0 | 0 |
| New.Clean | 0 | 0 | 0  | 0 | 0  | 0 | 0 | 0 |
| New.Clean | 0 | 0 | 0  | 1 | 0  | 0 | 0 | 0 |
| New.Clean | 0 | 0 | 0  | 0 | 0  | 0 | 0 | 0 |
| New.Clean | 0 | 0 | 0  | 0 | 0  | 0 | 0 | 0 |
| New.Clean | 0 | 0 | 0  | 0 | 0  | 0 | 0 | 0 |
| New.Clean | 0 | 0 | 0  | 0 | 0  | 0 | 0 | 0 |
| New.Clean | 0 | 0 | 0  | 0 | 0  | 0 | 0 | 0 |
| New.Clean | 1 | 5 | 31 | 0 | 0  | 0 | 0 | 0 |
| New.Clean | 0 | 0 | 0  | 0 | 0  | 0 | 0 | 0 |
| New.Clean | 0 | 8 | 0  | 0 | 0  | 0 | 0 | 0 |
| New.Clean | 0 | 0 | 0  | 0 | 0  | 0 | 0 | 0 |
| New.Clean | 0 | 0 | 0  | 0 | 0  | 0 | 0 | 0 |
| New.Clean | 0 | 0 | 0  | 0 | 0  | 0 | 0 | 0 |
| New.Clean | 0 | 0 | 1  | 0 | 0  | 0 | 0 | 0 |
| New.Clean | 0 | 0 | 1  | 0 | 0  | 0 | 0 | 0 |
| New.Clean | 0 | 0 | 0  | 0 | 0  | 0 | 0 | 0 |

|           |   |   |   |   |   |   |   |   |
|-----------|---|---|---|---|---|---|---|---|
| New.Clean | 0 | 0 | 0 | 0 | 0 | 0 | 0 | 0 |
| New.Clean | 0 | 0 | 0 | 0 | 0 | 0 | 0 | 0 |
| New.Clean | 0 | 0 | 0 | 0 | 0 | 1 | 0 | 0 |
| New.Clean | 0 | 0 | 0 | 0 | 0 | 0 | 0 | 0 |
| New.Clean | 0 | 0 | 1 | 0 | 0 | 0 | 0 | 3 |
| New.Clean | 0 | 0 | 0 | 0 | 0 | 0 | 0 | 0 |
| New.Clean | 0 | 0 | 0 | 0 | 0 | 0 | 0 | 0 |
| New.Clean | 0 | 0 | 0 | 0 | 0 | 0 | 0 | 0 |
| New.Clean | 0 | 0 | 0 | 0 | 0 | 0 | 0 | 0 |
| New.Clean | 0 | 0 | 0 | 0 | 0 | 0 | 0 | 0 |
| New.Clean | 0 | 0 | 0 | 0 | 0 | 0 | 0 | 0 |
| New.Clean | 0 | 0 | 0 | 0 | 0 | 0 | 0 | 0 |
| New.Clean | 0 | 0 | 0 | 0 | 0 | 0 | 0 | 0 |
| New.Clean | 0 | 0 | 0 | 0 | 0 | 0 | 0 | 0 |
| New.Clean | 0 | 0 | 0 | 0 | 0 | 0 | 0 | 0 |
| New.Clean | 1 | 0 | 0 | 0 | 0 | 0 | 0 | 0 |
| New.Clean | 0 | 0 | 0 | 0 | 0 | 1 | 0 | 0 |
| New.Clean | 0 | 0 | 0 | 0 | 0 | 0 | 0 | 0 |
| New.Clean | 0 | 0 | 0 | 0 | 0 | 0 | 0 | 0 |
| New.Clean | 0 | 0 | 0 | 0 | 0 | 0 | 0 | 0 |
| New.Clean | 0 | 0 | 0 | 0 | 0 | 0 | 3 | 0 |
| New.Clean | 1 | 0 | 0 | 1 | 0 | 0 | 0 | 0 |
| New.Clean | 2 | 0 | 0 | 0 | 0 | 0 | 0 | 0 |
| New.Clean | 0 | 0 | 0 | 0 | 0 | 0 | 0 | 1 |
| New.Clean | 0 | 0 | 0 | 2 | 0 | 0 | 0 | 0 |
| New.Clean | 0 | 0 | 0 | 0 | 0 | 0 | 0 | 0 |
| New.Clean | 0 | 0 | 0 | 0 | 0 | 0 | 0 | 0 |
| New.Clean | 0 | 0 | 0 | 0 | 0 | 0 | 0 | 0 |
| New.Clean | 0 | 0 | 0 | 0 | 0 | 0 | 0 | 0 |
| New.Clean | 0 | 0 | 0 | 0 | 0 | 0 | 0 | 0 |
| New.Clean | 0 | 0 | 0 | 0 | 0 | 0 | 0 | 0 |
| New.Clean | 0 | 0 | 0 | 0 | 0 | 0 | 0 | 0 |
| New.Clean | 0 | 0 | 0 | 0 | 0 | 0 | 0 | 2 |
| New.Clean | 0 | 0 | 0 | 0 | 0 | 0 | 0 | 0 |
| New.Clean | 0 | 0 | 0 | 0 | 0 | 0 | 0 | 0 |
| New.Clean | 0 | 0 | 0 | 0 | 0 | 0 | 0 | 0 |
| New.Clean | 1 | 0 | 4 | 0 | 0 | 0 | 0 | 0 |
| New.Clean | 0 | 0 | 0 | 0 | 0 | 0 | 0 | 1 |
| New.Clean | 0 | 0 | 0 | 0 | 1 | 0 | 0 | 0 |
| New.Clean | 0 | 0 | 0 | 0 | 0 | 0 | 0 | 0 |
| New.Clean | 0 | 0 | 0 | 0 | 0 | 0 | 0 | 0 |
| New.Clean | 0 | 0 | 0 | 0 | 0 | 0 | 0 | 0 |
| New.Clean | 0 | 0 | 0 | 0 | 1 | 0 | 1 | 0 |
| New.Clean | 0 | 0 | 0 | 0 | 2 | 0 | 0 | 0 |
| New.Clean | 0 | 0 | 0 | 0 | 0 | 0 | 0 | 0 |
| New.Clean | 0 | 0 | 0 | 0 | 0 | 0 | 0 | 0 |
| New.Clean | 0 | 0 | 0 | 0 | 0 | 0 | 0 | 0 |
| New.Clean | 0 | 0 | 0 | 0 | 0 | 0 | 0 | 0 |
| New.Clean | 0 | 0 | 0 | 0 | 0 | 0 | 0 | 0 |
| New.Clean | 0 | 0 | 0 | 0 | 0 | 0 | 0 | 0 |
| New.Clean | 0 | 0 | 0 | 0 | 0 | 0 | 0 | 0 |
| New.Clean | 0 | 0 | 0 | 0 | 0 | 0 | 0 | 0 |
| New.Clean | 0 | 0 | 0 | 0 | 0 | 0 | 0 | 0 |
| New.Clean | 0 | 0 | 0 | 0 | 0 | 0 | 0 | 0 |
| New.Clean | 0 | 0 | 0 | 0 | 0 | 0 | 0 | 0 |
| New.Clean | 0 | 4 | 0 | 0 | 0 | 0 | 0 | 0 |
| New.Clean | 0 | 0 | 0 | 0 | 0 | 0 | 0 | 0 |
| New.Clean | 0 | 0 | 0 | 0 | 0 | 0 | 0 | 0 |
| New.Clean | 0 | 0 | 0 | 0 | 0 | 0 | 0 | 0 |









|           |   |    |   |   |   |   |   |   |
|-----------|---|----|---|---|---|---|---|---|
| New.Clean | 0 | 1  | 0 | 0 | 0 | 0 | 0 | 0 |
| New.Clean | 0 | 0  | 0 | 0 | 0 | 0 | 0 | 0 |
| New.Clean | 0 | 2  | 0 | 0 | 0 | 0 | 0 | 0 |
| New.Clean | 0 | 0  | 0 | 0 | 0 | 0 | 0 | 0 |
| New.Clean | 0 | 0  | 0 | 0 | 0 | 0 | 0 | 0 |
| New.Clean | 0 | 0  | 0 | 0 | 0 | 0 | 4 | 3 |
| New.Clean | 0 | 0  | 0 | 0 | 0 | 0 | 1 | 0 |
| New.Clean | 0 | 0  | 0 | 0 | 0 | 0 | 0 | 0 |
| New.Clean | 0 | 0  | 0 | 0 | 0 | 0 | 0 | 0 |
| New.Clean | 0 | 0  | 0 | 0 | 0 | 0 | 0 | 0 |
| New.Clean | 0 | 0  | 0 | 0 | 0 | 0 | 0 | 0 |
| New.Clean | 0 | 0  | 0 | 0 | 0 | 0 | 0 | 0 |
| New.Clean | 0 | 0  | 0 | 0 | 0 | 0 | 0 | 0 |
| New.Clean | 0 | 0  | 0 | 0 | 0 | 0 | 2 | 0 |
| New.Clean | 0 | 0  | 0 | 0 | 0 | 0 | 0 | 0 |
| New.Clean | 0 | 0  | 0 | 0 | 0 | 0 | 0 | 0 |
| New.Clean | 0 | 0  | 0 | 0 | 1 | 0 | 2 | 1 |
| New.Clean | 0 | 0  | 0 | 0 | 0 | 0 | 0 | 0 |
| New.Clean | 0 | 0  | 0 | 0 | 0 | 0 | 0 | 0 |
| New.Clean | 0 | 0  | 0 | 0 | 0 | 0 | 0 | 0 |
| New.Clean | 0 | 0  | 0 | 0 | 0 | 0 | 0 | 0 |
| New.Clean | 0 | 0  | 0 | 0 | 0 | 0 | 0 | 0 |
| New.Clean | 0 | 0  | 0 | 0 | 0 | 3 | 0 | 0 |
| New.Clean | 0 | 0  | 0 | 0 | 0 | 0 | 0 | 1 |
| New.Clean | 1 | 0  | 0 | 0 | 0 | 0 | 2 | 0 |
| New.Clean | 0 | 0  | 0 | 0 | 0 | 0 | 0 | 0 |
| New.Clean | 0 | 0  | 0 | 0 | 0 | 0 | 0 | 0 |
| New.Clean | 0 | 0  | 0 | 0 | 0 | 0 | 0 | 0 |
| New.Clean | 0 | 0  | 0 | 0 | 0 | 0 | 0 | 0 |
| New.Clean | 0 | 6  | 0 | 0 | 0 | 0 | 0 | 0 |
| New.Clean | 0 | 0  | 0 | 0 | 0 | 0 | 0 | 0 |
| New.Clean | 0 | 0  | 0 | 0 | 0 | 0 | 0 | 0 |
| New.Clean | 0 | 0  | 0 | 0 | 0 | 0 | 0 | 0 |
| New.Clean | 0 | 0  | 0 | 0 | 0 | 0 | 0 | 0 |
| New.Clean | 0 | 0  | 0 | 0 | 0 | 0 | 0 | 0 |
| New.Clean | 0 | 0  | 0 | 0 | 0 | 0 | 0 | 0 |
| New.Clean | 0 | 0  | 0 | 0 | 0 | 0 | 0 | 0 |
| New.Clean | 0 | 0  | 0 | 0 | 0 | 0 | 0 | 0 |
| New.Clean | 0 | 0  | 0 | 0 | 0 | 0 | 0 | 0 |
| New.Clean | 0 | 0  | 0 | 0 | 0 | 0 | 0 | 0 |
| New.Clean | 0 | 0  | 0 | 0 | 0 | 1 | 1 | 0 |
| New.Clean | 0 | 23 | 0 | 0 | 0 | 0 | 0 | 0 |
| New.Clean | 0 | 1  | 0 | 0 | 0 | 0 | 0 | 0 |
| New.Clean | 0 | 0  | 0 | 0 | 0 | 0 | 0 | 0 |
| New.Clean | 0 | 0  | 0 | 0 | 0 | 0 | 0 | 0 |
| New.Clean | 0 | 0  | 0 | 0 | 0 | 0 | 0 | 0 |
| New.Clean | 0 | 0  | 0 | 0 | 0 | 0 | 0 | 0 |
| New.Clean | 0 | 0  | 0 | 0 | 0 | 0 | 0 | 0 |
| New.Clean | 0 | 0  | 0 | 0 | 0 | 0 | 0 | 0 |
| New.Clean | 0 | 0  | 0 | 0 | 0 | 0 | 0 | 0 |
| New.Clean | 0 | 0  | 0 | 0 | 0 | 0 | 0 | 0 |
| New.Clean | 0 | 0  | 0 | 0 | 0 | 0 | 0 | 0 |
| New.Clean | 0 | 0  | 0 | 0 | 0 | 0 | 0 | 0 |
| New.Clean | 0 | 0  | 0 | 0 | 0 | 0 | 0 | 0 |
| New.Clean | 0 | 0  | 0 | 0 | 0 | 0 | 0 | 0 |
| New.Clean | 0 | 0  | 0 | 0 | 0 | 0 | 0 | 0 |
| New.Clean | 0 | 0  | 0 | 0 | 0 | 0 | 0 | 0 |
| New.Clean | 0 | 0  | 0 | 0 | 0 | 2 | 0 | 0 |
| New.Clean | 0 | 0  | 0 | 0 | 0 | 0 | 0 | 0 |
| New.Clean | 0 | 0  | 0 | 0 | 0 | 0 | 0 | 0 |
| New.Clean | 0 | 0  | 0 | 0 | 0 | 0 | 2 | 0 |









|           |   |   |    |   |   |   |   |    |
|-----------|---|---|----|---|---|---|---|----|
| New.Clean | 0 | 0 | 0  | 0 | 0 | 0 | 0 | 0  |
| New.Clean | 0 | 0 | 1  | 0 | 0 | 0 | 0 | 0  |
| New.Clean | 0 | 0 | 0  | 0 | 0 | 0 | 0 | 0  |
| New.Clean | 0 | 0 | 0  | 0 | 1 | 0 | 0 | 0  |
| New.Clean | 0 | 0 | 0  | 0 | 0 | 0 | 0 | 0  |
| New.Clean | 0 | 0 | 0  | 0 | 0 | 0 | 0 | 0  |
| New.Clean | 0 | 0 | 0  | 0 | 0 | 0 | 0 | 0  |
| New.Clean | 0 | 0 | 0  | 0 | 0 | 0 | 0 | 0  |
| New.Clean | 0 | 0 | 0  | 0 | 0 | 0 | 0 | 0  |
| New.Clean | 0 | 0 | 0  | 0 | 0 | 0 | 0 | 0  |
| New.Clean | 0 | 0 | 0  | 0 | 0 | 0 | 0 | 4  |
| New.Clean | 0 | 0 | 0  | 0 | 0 | 0 | 0 | 0  |
| New.Clean | 0 | 0 | 0  | 0 | 0 | 4 | 0 | 0  |
| New.Clean | 0 | 0 | 0  | 0 | 0 | 0 | 0 | 0  |
| New.Clean | 0 | 0 | 15 | 4 | 4 | 0 | 6 | 1  |
| New.Clean | 0 | 0 | 0  | 0 | 0 | 0 | 0 | 0  |
| New.Clean | 0 | 0 | 0  | 0 | 0 | 0 | 0 | 0  |
| New.Clean | 0 | 0 | 0  | 0 | 0 | 0 | 0 | 0  |
| New.Clean | 0 | 0 | 0  | 0 | 0 | 0 | 0 | 0  |
| New.Clean | 0 | 0 | 0  | 1 | 0 | 0 | 0 | 0  |
| New.Clean | 0 | 0 | 0  | 0 | 0 | 0 | 0 | 0  |
| New.Clean | 0 | 0 | 0  | 0 | 0 | 0 | 0 | 44 |
| New.Clean | 0 | 0 | 0  | 0 | 0 | 0 | 0 | 0  |
| New.Clean | 0 | 0 | 0  | 0 | 0 | 0 | 0 | 0  |
| New.Clean | 0 | 0 | 0  | 0 | 0 | 0 | 0 | 0  |
| New.Clean | 0 | 0 | 0  | 0 | 0 | 0 | 0 | 0  |
| New.Clean | 0 | 0 | 0  | 0 | 0 | 0 | 0 | 0  |
| New.Clean | 0 | 0 | 0  | 0 | 0 | 0 | 0 | 0  |
| New.Clean | 0 | 3 | 0  | 0 | 0 | 0 | 0 | 0  |
| New.Clean | 0 | 0 | 0  | 0 | 0 | 0 | 0 | 0  |
| New.Clean | 0 | 0 | 0  | 0 | 0 | 0 | 0 | 0  |
| New.Clean | 0 | 0 | 0  | 0 | 0 | 0 | 0 | 0  |
| New.Clean | 0 | 0 | 0  | 0 | 0 | 0 | 0 | 0  |
| New.Clean | 0 | 1 | 0  | 0 | 0 | 0 | 0 | 0  |
| New.Clean | 0 | 0 | 0  | 0 | 0 | 0 | 0 | 0  |
| New.Clean | 0 | 0 | 0  | 2 | 0 | 0 | 0 | 0  |
| New.Clean | 0 | 0 | 1  | 0 | 0 | 0 | 0 | 0  |
| New.Clean | 0 | 0 | 0  | 0 | 0 | 0 | 0 | 0  |
| New.Clean | 0 | 0 | 0  | 0 | 0 | 0 | 0 | 0  |
| New.Clean | 0 | 0 | 0  | 0 | 0 | 0 | 0 | 0  |
| New.Clean | 0 | 0 | 0  | 0 | 0 | 0 | 0 | 0  |
| New.Clean | 0 | 1 | 0  | 0 | 0 | 0 | 0 | 0  |
| New.Clean | 0 | 0 | 0  | 0 | 0 | 0 | 0 | 0  |
| New.Clean | 0 | 0 | 0  | 0 | 0 | 0 | 0 | 0  |
| New.Clean | 0 | 0 | 0  | 0 | 0 | 0 | 0 | 0  |
| New.Clean | 0 | 0 | 0  | 0 | 0 | 0 | 0 | 0  |
| New.Clean | 0 | 0 | 0  | 0 | 0 | 0 | 0 | 0  |
| New.Clean | 0 | 0 | 0  | 0 | 0 | 0 | 0 | 0  |
| New.Clean | 0 | 0 | 0  | 0 | 0 | 0 | 0 | 0  |
| New.Clean | 0 | 0 | 0  | 0 | 0 | 0 | 0 | 0  |
| New.Clean | 0 | 0 | 0  | 0 | 0 | 0 | 0 | 0  |
| New.Clean | 0 | 1 | 0  | 0 | 0 | 0 | 0 | 0  |
| New.Clean | 0 | 0 | 0  | 0 | 0 | 0 | 0 | 0  |

|           |    |    |   |     |     |   |   |   |
|-----------|----|----|---|-----|-----|---|---|---|
| New.Clean | 0  | 0  | 0 | 0   | 0   | 0 | 0 | 0 |
| New.Clean | 0  | 0  | 0 | 0   | 0   | 0 | 0 | 0 |
| New.Clean | 0  | 0  | 0 | 0   | 0   | 0 | 0 | 0 |
| New.Clean | 0  | 0  | 3 | 0   | 0   | 0 | 0 | 0 |
| New.Clean | 0  | 0  | 0 | 0   | 0   | 0 | 0 | 0 |
| New.Clean | 0  | 0  | 0 | 0   | 0   | 0 | 0 | 0 |
| New.Clean | 0  | 0  | 0 | 0   | 0   | 0 | 0 | 0 |
| New.Clean | 0  | 0  | 0 | 0   | 0   | 0 | 0 | 0 |
| New.Clean | 0  | 37 | 0 | 0   | 0   | 0 | 0 | 0 |
| New.Clean | 0  | 0  | 1 | 0   | 0   | 0 | 0 | 0 |
| New.Clean | 0  | 0  | 0 | 0   | 0   | 0 | 0 | 0 |
| New.Clean | 0  | 0  | 0 | 0   | 0   | 0 | 0 | 0 |
| New.Clean | 0  | 0  | 1 | 0   | 1   | 0 | 0 | 0 |
| New.Clean | 0  | 0  | 0 | 0   | 0   | 0 | 0 | 0 |
| New.Clean | 0  | 0  | 0 | 0   | 0   | 0 | 0 | 0 |
| New.Clean | 0  | 0  | 0 | 0   | 0   | 0 | 0 | 0 |
| New.Clean | 0  | 0  | 0 | 0   | 0   | 0 | 0 | 0 |
| New.Clean | 0  | 0  | 0 | 0   | 0   | 0 | 0 | 0 |
| New.Clean | 0  | 0  | 0 | 0   | 0   | 0 | 0 | 0 |
| New.Clean | 0  | 0  | 0 | 0   | 0   | 0 | 0 | 0 |
| New.Clean | 0  | 0  | 0 | 0   | 0   | 0 | 0 | 0 |
| New.Clean | 0  | 0  | 0 | 0   | 0   | 0 | 0 | 0 |
| New.Clean | 0  | 0  | 0 | 0   | 0   | 1 | 1 | 0 |
| New.Clean | 0  | 0  | 0 | 1   | 0   | 0 | 0 | 0 |
| New.Clean | 0  | 0  | 0 | 0   | 0   | 0 | 0 | 0 |
| New.Clean | 0  | 2  | 0 | 0   | 0   | 0 | 0 | 0 |
| New.Clean | 0  | 0  | 0 | 0   | 0   | 0 | 0 | 0 |
| New.Clean | 0  | 0  | 0 | 0   | 0   | 0 | 0 | 0 |
| New.Clean | 0  | 0  | 0 | 0   | 0   | 0 | 0 | 0 |
| New.Clean | 0  | 0  | 0 | 0   | 0   | 0 | 0 | 0 |
| New.Clean | 0  | 0  | 0 | 0   | 0   | 0 | 0 | 0 |
| New.Clean | 0  | 0  | 0 | 0   | 0   | 0 | 0 | 0 |
| New.Clean | 0  | 0  | 0 | 0   | 0   | 1 | 0 | 4 |
| New.Clean | 0  | 0  | 0 | 0   | 0   | 0 | 0 | 0 |
| New.Clean | 0  | 0  | 0 | 0   | 0   | 0 | 0 | 0 |
| New.Clean | 0  | 0  | 0 | 0   | 0   | 0 | 0 | 0 |
| New.Clean | 0  | 0  | 0 | 0   | 0   | 0 | 0 | 0 |
| New.Clean | 0  | 0  | 0 | 0   | 0   | 0 | 0 | 0 |
| New.Clean | 0  | 0  | 0 | 0   | 0   | 0 | 0 | 0 |
| New.Clean | 0  | 0  | 0 | 0   | 0   | 0 | 0 | 0 |
| New.Clean | 0  | 0  | 0 | 0   | 0   | 0 | 0 | 0 |
| New.Clean | 0  | 0  | 0 | 0   | 0   | 0 | 0 | 1 |
| New.Clean | 0  | 0  | 0 | 0   | 0   | 0 | 0 | 1 |
| New.Clean | 0  | 0  | 0 | 0   | 0   | 0 | 0 | 0 |
| New.Clean | 0  | 0  | 0 | 0   | 0   | 0 | 0 | 0 |
| New.Clean | 0  | 0  | 0 | 0   | 0   | 0 | 0 | 0 |
| New.Clean | 0  | 0  | 0 | 0   | 0   | 0 | 0 | 0 |
| New.Clean | 0  | 0  | 0 | 0   | 0   | 0 | 0 | 0 |
| New.Clean | 0  | 0  | 0 | 0   | 0   | 0 | 0 | 0 |
| New.Clean | 0  | 0  | 0 | 0   | 0   | 0 | 0 | 0 |
| New.Clean | 0  | 0  | 0 | 0   | 0   | 0 | 0 | 0 |
| New.Clean | 0  | 0  | 3 | 0   | 0   | 0 | 0 | 0 |
| New.Clean | 0  | 0  | 0 | 0   | 0   | 0 | 0 | 0 |
| New.Clean | 0  | 0  | 0 | 0   | 0   | 0 | 0 | 0 |
| New.Clean | 0  | 0  | 0 | 0   | 0   | 0 | 0 | 0 |
| New.Clean | 16 | 0  | 0 | 187 | 459 | 0 | 0 | 0 |



|           |   |   |   |   |   |   |   |   |
|-----------|---|---|---|---|---|---|---|---|
| New.Clean | 0 | 0 | 0 | 0 | 0 | 0 | 0 | 0 |
| New.Clean | 0 | 0 | 0 | 0 | 1 | 0 | 0 | 0 |
| New.Clean | 0 | 0 | 0 | 0 | 0 | 0 | 0 | 0 |
| New.Clean | 0 | 0 | 0 | 0 | 0 | 0 | 0 | 0 |
| New.Clean | 0 | 0 | 0 | 0 | 0 | 0 | 0 | 0 |
| New.Clean | 0 | 0 | 0 | 0 | 0 | 0 | 0 | 0 |
| New.Clean | 0 | 0 | 0 | 0 | 0 | 0 | 5 | 0 |
| New.Clean | 0 | 0 | 0 | 0 | 0 | 3 | 0 | 0 |
| New.Clean | 0 | 0 | 0 | 0 | 0 | 0 | 0 | 0 |
| New.Clean | 0 | 0 | 0 | 0 | 0 | 0 | 0 | 0 |
| New.Clean | 0 | 0 | 0 | 2 | 0 | 0 | 0 | 0 |
| New.Clean | 0 | 0 | 0 | 0 | 0 | 0 | 0 | 0 |
| New.Clean | 0 | 0 | 0 | 0 | 0 | 0 | 0 | 0 |
| New.Clean | 0 | 1 | 0 | 0 | 0 | 0 | 0 | 0 |
| New.Clean | 0 | 0 | 0 | 0 | 0 | 0 | 0 | 0 |
| New.Clean | 0 | 0 | 0 | 0 | 0 | 0 | 0 | 0 |
| New.Clean | 0 | 0 | 0 | 0 | 0 | 0 | 0 | 0 |
| New.Clean | 0 | 0 | 0 | 0 | 0 | 0 | 0 | 0 |
| New.Clean | 0 | 0 | 0 | 0 | 0 | 0 | 0 | 0 |
| New.Clean | 0 | 0 | 0 | 0 | 0 | 0 | 0 | 0 |
| New.Clean | 0 | 0 | 0 | 0 | 0 | 0 | 0 | 0 |
| New.Clean | 0 | 0 | 0 | 0 | 0 | 0 | 0 | 0 |
| New.Clean | 0 | 0 | 0 | 0 | 0 | 0 | 0 | 0 |
| New.Clean | 0 | 0 | 0 | 0 | 0 | 0 | 0 | 0 |
| New.Clean | 0 | 0 | 0 | 0 | 0 | 0 | 0 | 0 |
| New.Clean | 0 | 0 | 0 | 0 | 0 | 0 | 0 | 0 |
| New.Clean | 0 | 0 | 0 | 0 | 0 | 0 | 0 | 0 |
| New.Clean | 0 | 0 | 0 | 0 | 0 | 0 | 0 | 0 |
| New.Clean | 0 | 0 | 0 | 0 | 0 | 0 | 0 | 0 |
| New.Clean | 0 | 0 | 0 | 0 | 0 | 0 | 0 | 0 |
| New.Clean | 0 | 0 | 0 | 0 | 0 | 0 | 0 | 0 |
| New.Clean | 0 | 0 | 0 | 0 | 0 | 0 | 0 | 0 |
| New.Clean | 0 | 0 | 0 | 0 | 0 | 0 | 0 | 0 |
| New.Clean | 0 | 0 | 0 | 0 | 0 | 0 | 0 | 0 |
| New.Clean | 0 | 0 | 0 | 0 | 0 | 0 | 1 | 0 |
| New.Clean | 0 | 0 | 0 | 0 | 0 | 0 | 0 | 0 |
| New.Clean | 0 | 0 | 0 | 0 | 0 | 0 | 0 | 0 |
| New.Clean | 0 | 0 | 0 | 0 | 0 | 0 | 0 | 0 |
| New.Clean | 0 | 0 | 0 | 0 | 0 | 0 | 0 | 0 |
| New.Clean | 0 | 0 | 0 | 0 | 0 | 0 | 0 | 0 |
| New.Clean | 0 | 0 | 0 | 0 | 0 | 0 | 0 | 0 |
| New.Clean | 0 | 0 | 0 | 0 | 1 | 0 | 0 | 0 |
| New.Clean | 0 | 0 | 0 | 0 | 0 | 0 | 0 | 0 |
| New.Clean | 0 | 0 | 0 | 1 | 0 | 1 | 0 | 4 |
| New.Clean | 0 | 0 | 0 | 0 | 0 | 0 | 0 | 0 |
| New.Clean | 0 | 0 | 0 | 0 | 0 | 1 | 0 | 0 |
| New.Clean | 0 | 0 | 0 | 0 | 0 | 0 | 0 | 0 |
| New.Clean | 0 | 0 | 0 | 0 | 0 | 0 | 0 | 0 |
| New.Clean | 0 | 0 | 0 | 0 | 0 | 0 | 0 | 0 |
| New.Clean | 0 | 0 | 0 | 0 | 0 | 1 | 0 | 2 |
| New.Clean | 0 | 0 | 0 | 0 | 0 | 0 | 0 | 0 |





|           |   |   |   |   |   |   |   |   |
|-----------|---|---|---|---|---|---|---|---|
| New.Clean | 0 | 0 | 0 | 0 | 0 | 0 | 0 | 0 |
| New.Clean | 0 | 1 | 0 | 0 | 0 | 0 | 0 | 0 |
| New.Clean | 0 | 0 | 0 | 0 | 0 | 0 | 0 | 0 |
| New.Clean | 0 | 0 | 0 | 0 | 0 | 0 | 0 | 0 |
| New.Clean | 0 | 0 | 0 | 0 | 0 | 0 | 0 | 0 |
| New.Clean | 0 | 1 | 0 | 0 | 0 | 0 | 0 | 0 |
| New.Clean | 0 | 0 | 1 | 0 | 0 | 0 | 0 | 0 |
| New.Clean | 0 | 0 | 0 | 0 | 0 | 0 | 0 | 0 |
| New.Clean | 0 | 0 | 0 | 0 | 0 | 0 | 0 | 0 |
| New.Clean | 0 | 0 | 0 | 0 | 0 | 0 | 0 | 0 |
| New.Clean | 0 | 0 | 0 | 0 | 0 | 0 | 0 | 0 |
| New.Clean | 0 | 0 | 0 | 0 | 0 | 0 | 0 | 0 |
| New.Clean | 0 | 0 | 0 | 4 | 0 | 0 | 0 | 0 |
| New.Clean | 0 | 0 | 0 | 0 | 0 | 0 | 0 | 0 |
| New.Clean | 0 | 0 | 2 | 0 | 0 | 0 | 0 | 0 |
| New.Clean | 0 | 1 | 0 | 0 | 0 | 1 | 0 | 0 |
| New.Clean | 0 | 0 | 0 | 0 | 0 | 0 | 0 | 0 |
| New.Clean | 0 | 0 | 0 | 0 | 0 | 0 | 0 | 0 |
| New.Clean | 0 | 0 | 0 | 0 | 1 | 0 | 0 | 0 |
| New.Clean | 0 | 0 | 0 | 0 | 0 | 0 | 0 | 0 |
| New.Clean | 0 | 0 | 1 | 0 | 0 | 0 | 0 | 1 |
| New.Clean | 0 | 0 | 0 | 0 | 0 | 0 | 0 | 0 |
| New.Clean | 0 | 0 | 0 | 0 | 0 | 0 | 0 | 0 |
| New.Clean | 0 | 0 | 0 | 0 | 0 | 0 | 0 | 0 |
| New.Clean | 0 | 0 | 0 | 0 | 0 | 0 | 0 | 0 |
| New.Clean | 0 | 0 | 0 | 0 | 0 | 0 | 0 | 0 |
| New.Clean | 0 | 0 | 0 | 0 | 0 | 1 | 0 | 0 |
| New.Clean | 0 | 0 | 0 | 0 | 0 | 0 | 0 | 0 |
| New.Clean | 0 | 0 | 0 | 0 | 0 | 0 | 0 | 0 |
| New.Clean | 0 | 0 | 0 | 0 | 0 | 0 | 0 | 0 |
| New.Clean | 0 | 0 | 0 | 0 | 0 | 1 | 0 | 1 |
| New.Clean | 0 | 0 | 0 | 0 | 0 | 0 | 0 | 0 |
| New.Clean | 0 | 0 | 0 | 0 | 0 | 0 | 0 | 0 |
| New.Clean | 0 | 1 | 0 | 0 | 0 | 0 | 0 | 0 |
| New.Clean | 4 | 0 | 0 | 0 | 0 | 0 | 0 | 0 |
| New.Clean | 0 | 0 | 0 | 0 | 0 | 0 | 0 | 0 |
| New.Clean | 0 | 0 | 0 | 1 | 0 | 0 | 0 | 0 |
| New.Clean | 1 | 0 | 0 | 0 | 0 | 0 | 0 | 0 |
| New.Clean | 0 | 0 | 0 | 0 | 0 | 0 | 0 | 0 |
| New.Clean | 0 | 0 | 0 | 0 | 0 | 0 | 0 | 0 |
| New.Clean | 0 | 0 | 0 | 0 | 0 | 0 | 0 | 0 |
| New.Clean | 0 | 0 | 0 | 0 | 0 | 0 | 0 | 0 |
| New.Clean | 0 | 0 | 0 | 0 | 0 | 0 | 0 | 0 |
| New.Clean | 0 | 0 | 0 | 0 | 0 | 0 | 0 | 0 |
| New.Clean | 0 | 0 | 0 | 0 | 0 | 0 | 0 | 0 |
| New.Clean | 0 | 0 | 0 | 0 | 0 | 0 | 0 | 0 |
| New.Clean | 0 | 0 | 0 | 0 | 0 | 0 | 0 | 0 |
| New.Clean | 0 | 0 | 0 | 0 | 0 | 0 | 0 | 0 |
| New.Clean | 0 | 0 | 0 | 0 | 0 | 0 | 0 | 0 |
| New.Clean | 0 | 0 | 0 | 0 | 0 | 0 | 0 | 0 |
| New.Clean | 0 | 0 | 0 | 0 | 0 | 0 | 0 | 0 |
| New.Clean | 0 | 0 | 0 | 0 | 0 | 0 | 2 | 0 |
| New.Clean | 0 | 0 | 0 | 0 | 0 | 0 | 0 | 0 |
| New.Clean | 0 | 0 | 0 | 0 | 0 | 0 | 0 | 0 |
| New.Clean | 0 | 0 | 0 | 0 | 0 | 0 | 0 | 0 |
| New.Clean | 0 | 0 | 0 | 0 | 0 | 0 | 0 | 0 |
| New.Clean | 0 | 0 | 0 | 0 | 0 | 0 | 0 | 1 |
| New.Clean | 0 | 0 | 0 | 0 | 0 | 0 | 0 | 0 |

|           |   |   |   |   |   |   |   |   |
|-----------|---|---|---|---|---|---|---|---|
| New.Clean | 0 | 0 | 0 | 0 | 0 | 0 | 0 | 0 |
| New.Clean | 0 | 0 | 0 | 0 | 0 | 0 | 0 | 0 |
| New.Clean | 0 | 0 | 0 | 0 | 0 | 0 | 0 | 0 |
| New.Clean | 0 | 0 | 0 | 0 | 0 | 0 | 0 | 0 |
| New.Clean | 0 | 0 | 0 | 0 | 0 | 0 | 0 | 0 |
| New.Clean | 0 | 0 | 0 | 0 | 0 | 0 | 0 | 0 |
| New.Clean | 0 | 0 | 0 | 0 | 0 | 1 | 0 | 0 |
| New.Clean | 0 | 0 | 0 | 0 | 0 | 2 | 0 | 0 |
| New.Clean | 0 | 0 | 0 | 0 | 0 | 1 | 0 | 0 |
| New.Clean | 0 | 0 | 0 | 0 | 0 | 0 | 0 | 0 |
| New.Clean | 0 | 0 | 0 | 0 | 0 | 0 | 0 | 0 |
| New.Clean | 0 | 0 | 0 | 0 | 0 | 0 | 0 | 0 |
| New.Clean | 0 | 0 | 0 | 0 | 0 | 0 | 0 | 0 |
| New.Clean | 0 | 0 | 0 | 0 | 0 | 1 | 0 | 0 |
| New.Clean | 0 | 0 | 2 | 0 | 0 | 0 | 0 | 0 |
| New.Clean | 0 | 0 | 0 | 0 | 0 | 0 | 0 | 0 |
| New.Clean | 0 | 0 | 0 | 0 | 0 | 1 | 0 | 0 |
| New.Clean | 0 | 0 | 0 | 0 | 0 | 0 | 0 | 0 |
| New.Clean | 0 | 0 | 0 | 0 | 0 | 0 | 0 | 0 |
| New.Clean | 3 | 0 | 0 | 0 | 0 | 0 | 0 | 0 |
| New.Clean | 0 | 0 | 0 | 0 | 0 | 0 | 0 | 0 |
| New.Clean | 0 | 0 | 0 | 0 | 0 | 0 | 0 | 0 |
| New.Clean | 0 | 0 | 0 | 0 | 0 | 0 | 0 | 0 |
| New.Clean | 0 | 0 | 1 | 0 | 0 | 1 | 0 | 0 |
| New.Clean | 2 | 0 | 0 | 0 | 0 | 0 | 0 | 0 |
| New.Clean | 0 | 0 | 0 | 0 | 0 | 0 | 0 | 0 |
| New.Clean | 0 | 0 | 0 | 0 | 0 | 0 | 0 | 0 |
| New.Clean | 0 | 0 | 0 | 0 | 0 | 2 | 0 | 0 |
| New.Clean | 0 | 0 | 0 | 0 | 0 | 0 | 0 | 0 |
| New.Clean | 0 | 0 | 0 | 0 | 0 | 0 | 0 | 0 |
| New.Clean | 0 | 0 | 0 | 0 | 0 | 0 | 0 | 0 |
| New.Clean | 2 | 0 | 0 | 0 | 0 | 0 | 0 | 0 |
| New.Clean | 0 | 0 | 0 | 0 | 0 | 0 | 0 | 0 |
| New.Clean | 0 | 0 | 5 | 0 | 0 | 0 | 0 | 0 |
| New.Clean | 0 | 2 | 0 | 0 | 0 | 0 | 0 | 0 |
| New.Clean | 0 | 0 | 0 | 0 | 0 | 0 | 0 | 0 |
| New.Clean | 0 | 0 | 0 | 0 | 0 | 0 | 0 | 0 |
| New.Clean | 0 | 0 | 0 | 0 | 0 | 0 | 0 | 0 |
| New.Clean | 0 | 0 | 0 | 0 | 0 | 0 | 0 | 0 |
| New.Clean | 0 | 0 | 0 | 0 | 0 | 0 | 0 | 0 |
| New.Clean | 0 | 0 | 0 | 1 | 0 | 0 | 0 | 0 |
| New.Clean | 0 | 0 | 0 | 0 | 0 | 0 | 0 | 0 |
| New.Clean | 0 | 0 | 0 | 0 | 0 | 0 | 0 | 2 |
| New.Clean | 0 | 0 | 0 | 0 | 0 | 0 | 0 | 0 |
| New.Clean | 0 | 0 | 0 | 0 | 0 | 0 | 0 | 0 |
| New.Clean | 0 | 0 | 0 | 0 | 5 | 0 | 0 | 0 |
| New.Clean | 0 | 0 | 0 | 0 | 0 | 0 | 0 | 0 |
| New.Clean | 1 | 0 | 0 | 1 | 0 | 0 | 0 | 0 |
| New.Clean | 0 | 0 | 0 | 0 | 0 | 0 | 0 | 0 |
| New.Clean | 0 | 0 | 0 | 0 | 0 | 0 | 0 | 0 |
| New.Clean | 0 | 0 | 0 | 0 | 0 | 0 | 0 | 3 |
| New.Clean | 0 | 0 | 0 | 0 | 0 | 0 | 0 | 0 |
| New.Clean | 0 | 0 | 0 | 0 | 1 | 0 | 0 | 0 |
| New.Clean | 0 | 0 | 0 | 0 | 0 | 0 | 0 | 0 |
| New.Clean | 0 | 0 | 0 | 0 | 0 | 0 | 0 | 0 |
| New.Clean | 0 | 0 | 0 | 0 | 0 | 0 | 0 | 0 |
| New.Clean | 0 | 0 | 0 | 0 | 0 | 1 | 0 | 0 |
| New.Clean | 0 | 0 | 0 | 0 | 0 | 0 | 0 | 0 |









|           |   |   |   |   |   |   |   |   |
|-----------|---|---|---|---|---|---|---|---|
| New.Clean | 0 | 0 | 1 | 0 | 0 | 0 | 0 | 0 |
| New.Clean | 0 | 0 | 0 | 0 | 0 | 0 | 0 | 0 |
| New.Clean | 0 | 0 | 0 | 0 | 0 | 1 | 0 | 0 |
| New.Clean | 0 | 0 | 0 | 0 | 0 | 0 | 0 | 0 |
| New.Clean | 0 | 0 | 0 | 0 | 0 | 0 | 0 | 0 |
| New.Clean | 0 | 0 | 0 | 0 | 0 | 0 | 0 | 0 |
| New.Clean | 0 | 0 | 0 | 0 | 0 | 0 | 0 | 0 |
| New.Clean | 0 | 0 | 0 | 0 | 0 | 0 | 0 | 0 |
| New.Clean | 0 | 0 | 0 | 0 | 0 | 0 | 0 | 0 |
| New.Clean | 0 | 0 | 0 | 0 | 0 | 0 | 0 | 0 |
| New.Clean | 0 | 0 | 0 | 0 | 0 | 0 | 0 | 0 |
| New.Clean | 0 | 0 | 0 | 0 | 0 | 0 | 0 | 0 |
| New.Clean | 0 | 0 | 0 | 0 | 0 | 0 | 0 | 0 |
| New.Clean | 0 | 0 | 0 | 0 | 0 | 0 | 1 | 0 |
| New.Clean | 0 | 0 | 0 | 0 | 0 | 0 | 0 | 0 |
| New.Clean | 0 | 0 | 0 | 0 | 0 | 0 | 0 | 0 |
| New.Clean | 0 | 0 | 0 | 0 | 0 | 0 | 0 | 0 |
| New.Clean | 0 | 0 | 0 | 0 | 0 | 0 | 0 | 0 |
| New.Clean | 0 | 0 | 0 | 0 | 0 | 0 | 0 | 0 |
| New.Clean | 0 | 0 | 0 | 0 | 0 | 0 | 0 | 0 |
| New.Clean | 0 | 0 | 0 | 0 | 0 | 0 | 0 | 0 |
| New.Clean | 0 | 0 | 0 | 0 | 0 | 2 | 0 | 0 |
| New.Clean | 0 | 0 | 0 | 0 | 0 | 0 | 0 | 0 |
| New.Clean | 0 | 0 | 0 | 0 | 0 | 0 | 0 | 0 |
| New.Clean | 0 | 0 | 0 | 0 | 0 | 0 | 0 | 0 |
| New.Clean | 0 | 0 | 0 | 1 | 0 | 1 | 0 | 0 |
| New.Clean | 0 | 0 | 0 | 0 | 0 | 0 | 0 | 0 |
| New.Clean | 0 | 0 | 0 | 0 | 0 | 0 | 0 | 0 |
| New.Clean | 0 | 0 | 0 | 0 | 0 | 0 | 0 | 0 |
| New.Clean | 0 | 0 | 0 | 0 | 0 | 0 | 0 | 0 |
| New.Clean | 0 | 0 | 0 | 0 | 0 | 0 | 0 | 0 |
| New.Clean | 0 | 0 | 1 | 0 | 0 | 0 | 0 | 0 |
| New.Clean | 0 | 0 | 0 | 0 | 0 | 0 | 1 | 0 |
| New.Clean | 0 | 0 | 0 | 0 | 0 | 0 | 0 | 0 |
| New.Clean | 0 | 0 | 0 | 0 | 0 | 0 | 0 | 0 |
| New.Clean | 0 | 0 | 0 | 0 | 1 | 0 | 0 | 0 |
| New.Clean | 0 | 0 | 0 | 0 | 0 | 0 | 0 | 0 |
| New.Clean | 0 | 0 | 0 | 0 | 0 | 0 | 0 | 0 |
| New.Clean | 0 | 0 | 0 | 0 | 0 | 0 | 0 | 0 |
| New.Clean | 0 | 0 | 1 | 0 | 0 | 0 | 0 | 0 |
| New.Clean | 0 | 0 | 0 | 0 | 0 | 0 | 0 | 0 |
| New.Clean | 0 | 0 | 0 | 0 | 0 | 0 | 0 | 0 |
| New.Clean | 0 | 0 | 0 | 0 | 0 | 0 | 0 | 0 |
| New.Clean | 0 | 0 | 0 | 0 | 0 | 0 | 0 | 0 |
| New.Clean | 0 | 1 | 0 | 0 | 0 | 0 | 0 | 0 |
| New.Clean | 5 | 0 | 0 | 0 | 0 | 0 | 0 | 0 |
| New.Clean | 0 | 1 | 0 | 0 | 0 | 0 | 0 | 0 |
| New.Clean | 0 | 0 | 0 | 0 | 0 | 0 | 0 | 0 |
| New.Clean | 0 | 0 | 0 | 0 | 0 | 2 | 0 | 0 |
| New.Clean | 0 | 0 | 0 | 1 | 0 | 0 | 0 | 1 |
| New.Clean | 0 | 0 | 0 | 0 | 0 | 0 | 0 | 0 |
| New.Clean | 0 | 0 | 0 | 0 | 0 | 0 | 0 | 2 |
| New.Clean | 0 | 0 | 0 | 0 | 0 | 0 | 0 | 0 |

|             |      |      |      |      |      |      |      |      |
|-------------|------|------|------|------|------|------|------|------|
| New.Clean   | 0    | 0    | 0    | 0    | 0    | 0    | 0    | 0    |
| New.Clean   | 0    | 0    | 0    | 0    | 0    | 0    | 0    | 0    |
| New.Clean   | 0    | 0    | 0    | 1    | 0    | 1    | 0    | 0    |
| New.Clean   | 0    | 1    | 0    | 0    | 0    | 0    | 0    | 0    |
| New.Clean   | 0    | 1    | 0    | 0    | 0    | 0    | 0    | 1    |
| New.Clean   | 0    | 0    | 0    | 0    | 0    | 0    | 0    | 0    |
| New.Clean   | 0    | 0    | 2    | 3    | 3    | 11   | 26   | 0    |
| New.Clean   | 0    | 0    | 0    | 0    | 0    | 0    | 0    | 0    |
| New.Clean   | 0    | 0    | 0    | 0    | 0    | 0    | 0    | 0    |
| New.Clean   | 0    | 0    | 0    | 0    | 0    | 0    | 0    | 0    |
| New.Clean   | 0    | 0    | 1    | 0    | 0    | 0    | 1    | 0    |
| New.Clean   | 0    | 0    | 0    | 0    | 0    | 0    | 0    | 0    |
| New.Clean   | 0    | 0    | 0    | 0    | 0    | 0    | 0    | 0    |
| New.Clean   | 0    | 0    | 0    | 0    | 1    | 0    | 0    | 0    |
| New.Clean   | 0    | 0    | 0    | 0    | 0    | 0    | 0    | 1    |
| New.Clean   | 0    | 0    | 0    | 0    | 0    | 0    | 0    | 0    |
| New.Clean   | 0    | 0    | 0    | 0    | 0    | 0    | 0    | 0    |
| New.Clean   | 0    | 1    | 0    | 0    | 0    | 0    | 0    | 0    |
| New.Clean   | 0    | 0    | 0    | 0    | 0    | 0    | 0    | 0    |
| New.Clean   | 0    | 0    | 0    | 0    | 0    | 0    | 0    | 0    |
| New.Clean   | 0    | 0    | 0    | 0    | 0    | 0    | 0    | 0    |
| New.Clean   | 0    | 0    | 0    | 0    | 0    | 0    | 0    | 0    |
| New.Clean   | 0    | 0    | 0    | 0    | 0    | 0    | 0    | 0    |
| New.Clean   | 0    | 0    | 0    | 0    | 0    | 0    | 0    | 1    |
| New.Clean   | 0    | 0    | 0    | 0    | 0    | 0    | 0    | 0    |
| New.Clean   | 0    | 0    | 0    | 0    | 0    | 0    | 0    | 0    |
| New.Clean   | 0    | 0    | 0    | 0    | 0    | 0    | 0    | 0    |
| New.Clean   | 0    | 0    | 0    | 0    | 0    | 0    | 0    | 0    |
| New.Clean   | 0    | 0    | 0    | 0    | 0    | 0    | 0    | 0    |
| New.Clean   | 0    | 0    | 0    | 0    | 0    | 0    | 0    | 0    |
| New.Clean   | 0    | 0    | 0    | 0    | 0    | 0    | 0    | 0    |
| New.Clean   | 0    | 0    | 0    | 0    | 0    | 0    | 0    | 0    |
| New.Clean   | 0    | 0    | 0    | 0    | 0    | 0    | 0    | 0    |
| New.Clean   | 0    | 0    | 0    | 0    | 0    | 0    | 0    | 0    |
| New.Clean   | 0    | 1    | 0    | 0    | 0    | 0    | 1    | 0    |
| New.Clean   | 0    | 3    | 0    | 0    | 0    | 0    | 0    | 0    |
| New.Clean   | 0    | 0    | 0    | 0    | 0    | 0    | 0    | 0    |
| New.Clean   | 0    | 2    | 0    | 0    | 0    | 0    | 0    | 0    |
| New.Clean   | 0    | 1    | 0    | 0    | 0    | 0    | 0    | 0    |
| New.Clean   | 0    | 0    | 0    | 0    | 0    | 0    | 0    | 0    |
| New.Clean   | 0    | 0    | 0    | 0    | 0    | 0    | 0    | 0    |
| QIIME clas: | 9316 | 7226 | 8068 | 7639 | 8468 | 8028 | 9234 | 7470 |

| 030S | 012S | 004S | 006S | 005S | 007S | 011S | 016S | 021S |   |
|------|------|------|------|------|------|------|------|------|---|
| 0    | 0    | 0    | 0    | 0    | 0    | 0    | 0    | 0    | 0 |
| 0    | 0    | 0    | 0    | 0    | 0    | 0    | 0    | 0    | 0 |
| 0    | 0    | 0    | 0    | 0    | 0    | 0    | 0    | 0    | 0 |
| 0    | 0    | 0    | 0    | 0    | 0    | 0    | 0    | 0    | 0 |
| 0    | 0    | 0    | 0    | 0    | 0    | 0    | 0    | 0    | 0 |
| 0    | 0    | 0    | 0    | 0    | 0    | 0    | 0    | 0    | 0 |
| 1    | 0    | 0    | 0    | 0    | 0    | 0    | 0    | 0    | 0 |
| 0    | 50   | 0    | 0    | 0    | 0    | 0    | 0    | 0    | 0 |
| 0    | 0    | 0    | 0    | 0    | 0    | 0    | 0    | 0    | 0 |
| 0    | 0    | 8    | 6    | 7    | 1    | 28   | 3    | 11   | 0 |
| 0    | 0    | 0    | 0    | 0    | 0    | 0    | 3    | 0    | 0 |
| 0    | 0    | 1    | 0    | 1    | 0    | 1    | 0    | 0    | 1 |
| 0    | 0    | 0    | 0    | 0    | 0    | 0    | 0    | 0    | 0 |
| 0    | 0    | 0    | 0    | 0    | 0    | 0    | 0    | 0    | 0 |
| 0    | 0    | 0    | 0    | 2    | 0    | 0    | 0    | 0    | 0 |
| 0    | 0    | 0    | 0    | 0    | 0    | 3    | 0    | 0    | 0 |
| 0    | 0    | 0    | 0    | 0    | 0    | 0    | 0    | 0    | 0 |
| 0    | 0    | 0    | 0    | 0    | 0    | 4    | 0    | 0    | 0 |
| 0    | 0    | 0    | 0    | 0    | 0    | 0    | 0    | 0    | 0 |
| 0    | 0    | 0    | 0    | 0    | 0    | 0    | 1    | 0    | 0 |
| 0    | 9    | 0    | 0    | 8    | 0    | 1    | 2    | 1    | 0 |
| 0    | 0    | 0    | 0    | 0    | 0    | 3    | 0    | 0    | 0 |
| 0    | 0    | 2    | 0    | 2    | 0    | 0    | 2    | 5    | 0 |
| 0    | 0    | 0    | 0    | 0    | 0    | 0    | 0    | 0    | 0 |
| 38   | 0    | 96   | 97   | 25   | 0    | 16   | 211  | 144  | 0 |
| 0    | 0    | 0    | 0    | 0    | 0    | 0    | 0    | 0    | 0 |
| 0    | 0    | 0    | 0    | 0    | 0    | 0    | 0    | 0    | 0 |
| 0    | 0    | 0    | 0    | 0    | 0    | 0    | 0    | 0    | 0 |
| 0    | 2    | 0    | 0    | 0    | 0    | 0    | 0    | 0    | 0 |
| 0    | 0    | 0    | 0    | 0    | 0    | 0    | 0    | 0    | 0 |
| 0    | 0    | 0    | 1    | 0    | 0    | 0    | 0    | 0    | 0 |
| 0    | 0    | 0    | 0    | 0    | 0    | 0    | 0    | 0    | 0 |
| 0    | 0    | 0    | 0    | 0    | 0    | 0    | 2    | 0    | 0 |
| 0    | 0    | 0    | 0    | 0    | 0    | 0    | 0    | 0    | 0 |
| 0    | 0    | 0    | 0    | 0    | 0    | 0    | 0    | 0    | 0 |
| 0    | 0    | 0    | 0    | 0    | 0    | 0    | 0    | 0    | 0 |
| 0    | 0    | 0    | 0    | 0    | 0    | 0    | 0    | 0    | 0 |
| 0    | 0    | 0    | 0    | 0    | 0    | 0    | 0    | 0    | 0 |
| 0    | 0    | 0    | 0    | 0    | 0    | 0    | 0    | 0    | 0 |
| 0    | 0    | 0    | 0    | 0    | 0    | 0    | 0    | 0    | 0 |
| 0    | 0    | 0    | 0    | 0    | 0    | 0    | 0    | 0    | 0 |
| 0    | 0    | 0    | 0    | 0    | 0    | 0    | 0    | 0    | 0 |
| 0    | 0    | 0    | 0    | 0    | 0    | 0    | 0    | 0    | 0 |
| 0    | 0    | 0    | 0    | 0    | 0    | 0    | 0    | 0    | 0 |
| 0    | 0    | 0    | 0    | 0    | 0    | 0    | 0    | 0    | 0 |
| 0    | 0    | 0    | 0    | 0    | 0    | 0    | 0    | 0    | 0 |
| 0    | 0    | 0    | 0    | 0    | 0    | 0    | 0    | 0    | 0 |
| 0    | 0    | 0    | 0    | 0    | 0    | 0    | 0    | 0    | 0 |
| 0    | 0    | 0    | 0    | 0    | 0    | 0    | 0    | 0    | 0 |
| 0    | 0    | 0    | 0    | 0    | 0    | 2    | 0    | 0    | 1 |
| 0    | 0    | 0    | 0    | 0    | 0    | 3    | 0    | 0    | 0 |









|   |   |   |   |   |    |   |    |   |
|---|---|---|---|---|----|---|----|---|
| 0 | 0 | 0 | 0 | 0 | 0  | 0 | 0  | 0 |
| 0 | 0 | 0 | 0 | 0 | 0  | 0 | 0  | 0 |
| 0 | 0 | 0 | 0 | 0 | 0  | 0 | 0  | 0 |
| 0 | 0 | 0 | 0 | 0 | 1  | 0 | 0  | 0 |
| 0 | 0 | 0 | 0 | 0 | 12 | 0 | 27 | 0 |
| 0 | 0 | 0 | 0 | 0 | 5  | 0 | 0  | 0 |
| 0 | 0 | 0 | 0 | 0 | 0  | 0 | 0  | 0 |
| 0 | 0 | 0 | 0 | 0 | 0  | 0 | 0  | 0 |
| 0 | 1 | 1 | 0 | 0 | 0  | 0 | 0  | 0 |
| 0 | 0 | 0 | 0 | 0 | 0  | 0 | 0  | 0 |
| 0 | 0 | 0 | 0 | 0 | 0  | 1 | 0  | 0 |
| 0 | 0 | 0 | 0 | 0 | 0  | 0 | 0  | 0 |
| 0 | 0 | 0 | 0 | 0 | 1  | 0 | 0  | 0 |
| 0 | 0 | 0 | 0 | 0 | 0  | 0 | 0  | 0 |
| 0 | 0 | 0 | 0 | 0 | 0  | 0 | 0  | 0 |
| 0 | 0 | 0 | 0 | 0 | 0  | 0 | 0  | 0 |
| 0 | 0 | 0 | 0 | 0 | 0  | 0 | 0  | 1 |
| 0 | 0 | 0 | 0 | 0 | 0  | 0 | 0  | 0 |
| 0 | 0 | 0 | 0 | 0 | 2  | 0 | 0  | 0 |
| 0 | 0 | 0 | 0 | 0 | 0  | 0 | 0  | 0 |
| 0 | 0 | 0 | 0 | 0 | 20 | 0 | 0  | 0 |
| 0 | 0 | 0 | 0 | 0 | 0  | 0 | 0  | 0 |
| 0 | 0 | 0 | 0 | 0 | 0  | 0 | 0  | 0 |
| 0 | 0 | 0 | 0 | 0 | 0  | 0 | 0  | 0 |
| 0 | 0 | 0 | 0 | 0 | 0  | 0 | 0  | 0 |
| 0 | 0 | 0 | 0 | 0 | 0  | 0 | 0  | 0 |
| 0 | 0 | 0 | 0 | 0 | 0  | 0 | 0  | 0 |
| 0 | 0 | 0 | 0 | 0 | 0  | 0 | 0  | 0 |
| 0 | 0 | 0 | 0 | 0 | 0  | 0 | 0  | 0 |
| 0 | 0 | 0 | 0 | 0 | 0  | 2 | 0  | 0 |
| 0 | 0 | 0 | 0 | 0 | 0  | 0 | 0  | 0 |
| 1 | 0 | 0 | 0 | 0 | 2  | 0 | 0  | 1 |
| 0 | 0 | 0 | 0 | 0 | 0  | 0 | 0  | 0 |
| 0 | 1 | 0 | 0 | 0 | 0  | 0 | 0  | 0 |
| 0 | 0 | 0 | 0 | 0 | 0  | 0 | 0  | 0 |
| 0 | 0 | 0 | 0 | 0 | 0  | 0 | 0  | 0 |
| 0 | 0 | 0 | 0 | 0 | 0  | 0 | 0  | 0 |
| 0 | 0 | 0 | 0 | 0 | 0  | 0 | 0  | 0 |
| 0 | 0 | 0 | 0 | 0 | 0  | 0 | 0  | 0 |
| 0 | 0 | 0 | 0 | 0 | 0  | 0 | 0  | 0 |
| 0 | 0 | 0 | 0 | 3 | 0  | 0 | 0  | 0 |
| 0 | 0 | 0 | 0 | 0 | 0  | 0 | 0  | 0 |
| 0 | 0 | 0 | 0 | 0 | 0  | 0 | 0  | 0 |
| 0 | 0 | 1 | 0 | 0 | 0  | 0 | 0  | 1 |
| 0 | 3 | 0 | 0 | 0 | 1  | 0 | 0  | 0 |
| 0 | 0 | 0 | 0 | 0 | 0  | 0 | 0  | 0 |
| 0 | 0 | 0 | 0 | 0 | 0  | 0 | 0  | 0 |
| 0 | 0 | 0 | 0 | 0 | 0  | 0 | 0  | 0 |
| 0 | 0 | 0 | 0 | 0 | 0  | 0 | 0  | 0 |
| 0 | 1 | 0 | 0 | 0 | 0  | 0 | 0  | 0 |
| 0 | 0 | 0 | 0 | 0 | 0  | 0 | 0  | 0 |
| 0 | 0 | 0 | 0 | 0 | 0  | 0 | 0  | 0 |
| 0 | 0 | 0 | 0 | 0 | 0  | 0 | 0  | 0 |
| 0 | 0 | 0 | 0 | 0 | 0  | 0 | 0  | 6 |
| 0 | 1 | 0 | 0 | 0 | 0  | 0 | 0  | 0 |





|    |     |   |    |    |   |    |     |    |
|----|-----|---|----|----|---|----|-----|----|
| 32 | 0   | 0 | 6  | 1  | 0 | 6  | 19  | 1  |
| 0  | 0   | 0 | 0  | 0  | 0 | 0  | 0   | 0  |
| 2  | 0   | 0 | 0  | 0  | 0 | 0  | 0   | 0  |
| 9  | 5   | 3 | 2  | 5  | 0 | 0  | 12  | 0  |
| 0  | 0   | 0 | 0  | 0  | 0 | 0  | 0   | 0  |
| 0  | 0   | 0 | 0  | 0  | 0 | 0  | 0   | 0  |
| 0  | 0   | 0 | 0  | 1  | 0 | 0  | 0   | 0  |
| 0  | 0   | 0 | 0  | 0  | 0 | 0  | 0   | 0  |
| 0  | 0   | 0 | 0  | 0  | 0 | 0  | 0   | 0  |
| 0  | 0   | 0 | 0  | 0  | 1 | 0  | 0   | 0  |
| 0  | 0   | 0 | 0  | 0  | 0 | 0  | 0   | 0  |
| 0  | 0   | 0 | 0  | 0  | 0 | 0  | 0   | 0  |
| 0  | 0   | 0 | 0  | 0  | 0 | 0  | 0   | 0  |
| 0  | 0   | 0 | 0  | 0  | 0 | 0  | 0   | 0  |
| 0  | 0   | 0 | 0  | 0  | 0 | 0  | 0   | 0  |
| 0  | 0   | 0 | 0  | 0  | 0 | 0  | 0   | 0  |
| 0  | 0   | 0 | 0  | 0  | 0 | 0  | 0   | 0  |
| 1  | 0   | 0 | 0  | 0  | 0 | 0  | 0   | 0  |
| 0  | 0   | 0 | 0  | 0  | 1 | 0  | 0   | 0  |
| 0  | 0   | 0 | 0  | 0  | 0 | 0  | 0   | 0  |
| 0  | 0   | 0 | 0  | 0  | 0 | 0  | 0   | 2  |
| 0  | 0   | 0 | 0  | 0  | 0 | 0  | 0   | 0  |
| 0  | 0   | 0 | 0  | 0  | 0 | 0  | 0   | 0  |
| 1  | 0   | 0 | 0  | 0  | 0 | 0  | 0   | 0  |
| 0  | 0   | 0 | 0  | 0  | 0 | 0  | 0   | 0  |
| 0  | 0   | 0 | 0  | 0  | 0 | 0  | 2   | 0  |
| 0  | 0   | 0 | 0  | 0  | 0 | 0  | 0   | 0  |
| 0  | 0   | 0 | 0  | 1  | 0 | 2  | 0   | 0  |
| 0  | 0   | 0 | 0  | 0  | 0 | 0  | 0   | 0  |
| 0  | 1   | 0 | 0  | 0  | 0 | 0  | 0   | 0  |
| 0  | 0   | 0 | 0  | 0  | 0 | 0  | 0   | 0  |
| 0  | 2   | 0 | 0  | 0  | 0 | 0  | 0   | 0  |
| 0  | 0   | 0 | 0  | 0  | 0 | 0  | 0   | 0  |
| 0  | 0   | 0 | 0  | 0  | 0 | 0  | 0   | 0  |
| 0  | 0   | 0 | 0  | 0  | 0 | 0  | 0   | 0  |
| 0  | 0   | 0 | 0  | 0  | 0 | 0  | 0   | 0  |
| 0  | 0   | 0 | 2  | 0  | 0 | 0  | 1   | 0  |
| 1  | 0   | 0 | 0  | 0  | 2 | 0  | 0   | 0  |
| 0  | 0   | 0 | 0  | 0  | 0 | 0  | 0   | 0  |
| 0  | 0   | 0 | 0  | 0  | 0 | 0  | 0   | 0  |
| 0  | 0   | 0 | 0  | 0  | 0 | 0  | 0   | 0  |
| 1  | 0   | 0 | 0  | 0  | 1 | 0  | 0   | 0  |
| 0  | 0   | 0 | 0  | 0  | 0 | 0  | 0   | 0  |
| 0  | 0   | 0 | 0  | 0  | 0 | 0  | 0   | 0  |
| 1  | 3   | 8 | 3  | 8  | 0 | 0  | 2   | 15 |
| 0  | 0   | 0 | 0  | 0  | 0 | 0  | 0   | 0  |
| 0  | 0   | 0 | 0  | 0  | 0 | 0  | 0   | 0  |
| 0  | 1   | 0 | 0  | 0  | 0 | 0  | 0   | 0  |
| 0  | 34  | 0 | 0  | 0  | 0 | 0  | 0   | 0  |
| 0  | 0   | 0 | 0  | 0  | 4 | 0  | 0   | 0  |
| 0  | 0   | 0 | 1  | 0  | 0 | 0  | 0   | 4  |
| 0  | 0   | 0 | 0  | 0  | 0 | 0  | 0   | 0  |
| 0  | 0   | 0 | 0  | 0  | 0 | 0  | 0   | 0  |
| 6  | 122 | 6 | 36 | 14 | 0 | 12 | 100 | 66 |
| 0  | 0   | 0 | 0  | 0  | 0 | 0  | 0   | 0  |
| 4  | 1   | 7 | 1  | 2  | 0 | 0  | 6   | 0  |

|   |      |   |    |   |    |   |     |     |
|---|------|---|----|---|----|---|-----|-----|
| 0 | 0    | 0 | 0  | 0 | 0  | 0 | 0   | 0   |
| 0 | 0    | 0 | 0  | 0 | 0  | 0 | 0   | 0   |
| 0 | 1    | 0 | 0  | 0 | 0  | 0 | 0   | 0   |
| 1 | 1    | 0 | 0  | 0 | 0  | 0 | 0   | 0   |
| 0 | 0    | 0 | 0  | 0 | 0  | 0 | 0   | 0   |
| 0 | 0    | 0 | 0  | 0 | 0  | 0 | 0   | 0   |
| 0 | 0    | 0 | 0  | 0 | 0  | 1 | 0   | 0   |
| 0 | 0    | 0 | 1  | 0 | 0  | 0 | 0   | 0   |
| 0 | 0    | 0 | 0  | 0 | 0  | 0 | 0   | 0   |
| 0 | 0    | 0 | 0  | 0 | 0  | 0 | 0   | 0   |
| 0 | 2    | 0 | 0  | 0 | 0  | 0 | 0   | 0   |
| 0 | 0    | 0 | 6  | 0 | 14 | 0 | 0   | 0   |
| 0 | 0    | 0 | 0  | 0 | 1  | 0 | 0   | 0   |
| 0 | 0    | 0 | 0  | 0 | 0  | 0 | 0   | 0   |
| 0 | 0    | 0 | 0  | 0 | 0  | 0 | 0   | 0   |
| 1 | 0    | 0 | 0  | 0 | 1  | 0 | 0   | 0   |
| 0 | 0    | 0 | 0  | 0 | 0  | 2 | 0   | 2   |
| 1 | 0    | 0 | 0  | 0 | 0  | 0 | 0   | 0   |
| 0 | 0    | 0 | 0  | 0 | 0  | 0 | 0   | 0   |
| 0 | 0    | 0 | 0  | 0 | 0  | 0 | 0   | 0   |
| 0 | 0    | 0 | 0  | 0 | 0  | 1 | 0   | 0   |
| 0 | 0    | 0 | 0  | 0 | 0  | 0 | 0   | 1   |
| 0 | 0    | 0 | 0  | 0 | 0  | 0 | 0   | 0   |
| 0 | 5    | 0 | 0  | 2 | 0  | 0 | 0   | 2   |
| 0 | 0    | 0 | 0  | 1 | 1  | 0 | 0   | 0   |
| 0 | 0    | 0 | 0  | 0 | 0  | 0 | 0   | 0   |
| 0 | 0    | 0 | 0  | 0 | 0  | 0 | 1   | 1   |
| 0 | 0    | 0 | 0  | 0 | 0  | 0 | 0   | 0   |
| 0 | 0    | 0 | 0  | 0 | 0  | 1 | 2   | 0   |
| 0 | 0    | 0 | 17 | 0 | 0  | 0 | 0   | 0   |
| 0 | 0    | 0 | 0  | 0 | 24 | 0 | 0   | 0   |
| 0 | 0    | 0 | 0  | 0 | 2  | 0 | 599 | 0   |
| 0 | 0    | 0 | 0  | 0 | 0  | 0 | 0   | 0   |
| 0 | 0    | 0 | 0  | 0 | 2  | 0 | 0   | 0   |
| 0 | 0    | 0 | 0  | 0 | 1  | 0 | 0   | 0   |
| 0 | 0    | 0 | 0  | 0 | 0  | 0 | 0   | 0   |
| 0 | 0    | 0 | 0  | 0 | 0  | 0 | 0   | 0   |
| 0 | 0    | 0 | 0  | 0 | 0  | 0 | 0   | 0   |
| 0 | 1    | 0 | 1  | 0 | 0  | 4 | 0   | 2   |
| 0 | 0    | 0 | 0  | 0 | 1  | 0 | 0   | 0   |
| 0 | 0    | 0 | 0  | 0 | 0  | 0 | 0   | 0   |
| 0 | 0    | 0 | 0  | 0 | 0  | 0 | 0   | 0   |
| 0 | 0    | 0 | 0  | 0 | 0  | 0 | 0   | 0   |
| 0 | 0    | 0 | 0  | 0 | 0  | 0 | 0   | 0   |
| 0 | 0    | 0 | 0  | 0 | 0  | 0 | 0   | 0   |
| 0 | 0    | 0 | 0  | 0 | 0  | 0 | 0   | 0   |
| 0 | 0    | 0 | 0  | 0 | 0  | 0 | 0   | 0   |
| 0 | 174  | 0 | 34 | 2 | 31 | 0 | 0   | 139 |
| 0 | 0    | 0 | 0  | 0 | 0  | 0 | 0   | 0   |
| 0 | 0    | 0 | 0  | 0 | 0  | 0 | 0   | 0   |
| 0 | 0    | 0 | 0  | 0 | 0  | 0 | 0   | 0   |
| 0 | 0    | 0 | 0  | 0 | 0  | 0 | 0   | 0   |
| 0 | 0    | 0 | 0  | 0 | 0  | 0 | 0   | 0   |
| 0 | 0    | 0 | 0  | 0 | 0  | 0 | 0   | 0   |
| 0 | 0    | 0 | 0  | 0 | 0  | 0 | 0   | 0   |
| 0 | 0    | 0 | 0  | 0 | 0  | 0 | 0   | 0   |
| 0 | 0    | 0 | 0  | 0 | 0  | 0 | 0   | 0   |
| 0 | 0    | 0 | 0  | 0 | 0  | 0 | 0   | 0   |
| 0 | 0    | 0 | 0  | 0 | 0  | 0 | 0   | 0   |
| 0 | 0    | 0 | 0  | 0 | 0  | 0 | 0   | 0   |
| 0 | 0    | 0 | 0  | 0 | 0  | 0 | 0   | 0   |
| 0 | 0    | 0 | 0  | 0 | 0  | 0 | 0   | 0   |
| 0 | 1439 | 0 | 0  | 0 | 0  | 0 | 0   | 3   |
| 0 | 0    | 0 | 0  | 0 | 0  | 0 | 1   | 0   |
| 0 | 0    | 0 | 0  | 0 | 0  | 0 | 0   | 0   |
| 0 | 0    | 0 | 0  | 0 | 14 | 0 | 0   | 0   |
| 0 | 0    | 0 | 0  | 0 | 16 | 0 | 0   | 0   |







|    |    |    |   |   |    |   |   |      |
|----|----|----|---|---|----|---|---|------|
| 0  | 0  | 0  | 0 | 0 | 24 | 0 | 0 | 0    |
| 0  | 0  | 0  | 0 | 0 | 3  | 0 | 0 | 0    |
| 0  | 0  | 0  | 0 | 0 | 0  | 0 | 2 | 0    |
| 0  | 0  | 0  | 0 | 0 | 0  | 0 | 0 | 0    |
| 0  | 0  | 0  | 1 | 0 | 0  | 0 | 0 | 0    |
| 0  | 0  | 0  | 0 | 0 | 0  | 0 | 0 | 0    |
| 0  | 0  | 0  | 0 | 0 | 0  | 0 | 3 | 0    |
| 0  | 0  | 0  | 0 | 0 | 0  | 0 | 0 | 0    |
| 0  | 0  | 0  | 0 | 0 | 0  | 0 | 0 | 0    |
| 5  | 1  | 0  | 0 | 0 | 0  | 0 | 0 | 0    |
| 0  | 0  | 0  | 0 | 0 | 2  | 0 | 0 | 0    |
| 0  | 79 | 0  | 0 | 0 | 0  | 0 | 0 | 0    |
| 0  | 0  | 0  | 0 | 0 | 0  | 0 | 0 | 0    |
| 0  | 0  | 0  | 0 | 0 | 2  | 0 | 0 | 0    |
| 0  | 0  | 0  | 0 | 0 | 4  | 0 | 0 | 0    |
| 0  | 1  | 0  | 0 | 0 | 0  | 0 | 0 | 0    |
| 0  | 0  | 0  | 0 | 0 | 2  | 0 | 0 | 0    |
| 0  | 1  | 0  | 0 | 0 | 0  | 0 | 0 | 0    |
| 0  | 1  | 0  | 0 | 0 | 0  | 0 | 0 | 0    |
| 0  | 0  | 0  | 0 | 0 | 0  | 0 | 0 | 0    |
| 0  | 0  | 0  | 0 | 0 | 0  | 0 | 0 | 0    |
| 0  | 0  | 1  | 0 | 0 | 0  | 0 | 0 | 0    |
| 0  | 0  | 0  | 0 | 0 | 1  | 0 | 0 | 0    |
| 0  | 0  | 0  | 0 | 0 | 0  | 0 | 0 | 0    |
| 0  | 0  | 0  | 0 | 0 | 0  | 0 | 0 | 0    |
| 0  | 0  | 0  | 0 | 1 | 0  | 0 | 0 | 0    |
| 0  | 0  | 0  | 0 | 0 | 0  | 0 | 0 | 0    |
| 0  | 0  | 0  | 0 | 0 | 0  | 0 | 0 | 2    |
| 0  | 0  | 0  | 0 | 0 | 0  | 0 | 0 | 2    |
| 0  | 1  | 3  | 0 | 0 | 0  | 0 | 1 | 0    |
| 6  | 1  | 0  | 0 | 0 | 1  | 0 | 0 | 0    |
| 1  | 0  | 0  | 0 | 0 | 1  | 0 | 0 | 0    |
| 0  | 0  | 0  | 0 | 0 | 0  | 0 | 0 | 0    |
| 0  | 0  | 0  | 0 | 0 | 0  | 0 | 0 | 0    |
| 0  | 0  | 0  | 0 | 0 | 0  | 0 | 0 | 0    |
| 0  | 0  | 0  | 0 | 0 | 0  | 0 | 0 | 0    |
| 0  | 0  | 0  | 0 | 0 | 0  | 0 | 0 | 0    |
| 0  | 1  | 0  | 0 | 7 | 0  | 4 | 0 | 0    |
| 0  | 0  | 0  | 0 | 0 | 0  | 0 | 0 | 0    |
| 0  | 0  | 0  | 0 | 0 | 2  | 0 | 0 | 0    |
| 0  | 0  | 0  | 0 | 0 | 0  | 0 | 0 | 0    |
| 0  | 1  | 0  | 1 | 0 | 0  | 0 | 0 | 0    |
| 0  | 0  | 0  | 0 | 0 | 0  | 0 | 0 | 1    |
| 0  | 0  | 0  | 0 | 0 | 0  | 0 | 0 | 0    |
| 0  | 0  | 0  | 0 | 0 | 0  | 0 | 0 | 0    |
| 3  | 2  | 0  | 1 | 1 | 0  | 0 | 1 | 0    |
| 0  | 0  | 0  | 0 | 0 | 2  | 0 | 0 | 0    |
| 0  | 0  | 0  | 0 | 0 | 0  | 0 | 0 | 0    |
| 0  | 0  | 0  | 0 | 0 | 0  | 0 | 0 | 9    |
| 0  | 0  | 19 | 0 | 0 | 0  | 0 | 0 | 1651 |
| 17 | 0  | 0  | 0 | 0 | 0  | 0 | 0 | 0    |
| 0  | 0  | 0  | 0 | 0 | 0  | 0 | 0 | 0    |
| 0  | 0  | 0  | 0 | 0 | 0  | 0 | 0 | 0    |
| 2  | 0  | 0  | 0 | 0 | 2  | 0 | 0 | 0    |
| 0  | 0  | 0  | 1 | 0 | 0  | 0 | 0 | 0    |

|   |   |   |     |   |     |   |     |   |
|---|---|---|-----|---|-----|---|-----|---|
| 0 | 0 | 0 | 0   | 0 | 16  | 0 | 0   | 0 |
| 1 | 2 | 2 | 0   | 0 | 0   | 0 | 0   | 0 |
| 0 | 0 | 0 | 0   | 0 | 0   | 0 | 0   | 0 |
| 0 | 0 | 0 | 0   | 0 | 1   | 0 | 0   | 0 |
| 0 | 0 | 0 | 0   | 0 | 3   | 0 | 0   | 0 |
| 0 | 0 | 0 | 100 | 0 | 0   | 0 | 0   | 0 |
| 0 | 0 | 0 | 0   | 0 | 1   | 0 | 0   | 0 |
| 0 | 0 | 0 | 0   | 0 | 0   | 0 | 0   | 0 |
| 0 | 0 | 0 | 0   | 0 | 0   | 0 | 0   | 0 |
| 0 | 0 | 0 | 0   | 0 | 6   | 0 | 0   | 0 |
| 0 | 0 | 0 | 0   | 0 | 0   | 0 | 378 | 0 |
| 0 | 0 | 0 | 0   | 0 | 0   | 0 | 0   | 0 |
| 0 | 0 | 0 | 0   | 0 | 0   | 0 | 0   | 0 |
| 0 | 0 | 0 | 0   | 0 | 0   | 0 | 0   | 0 |
| 0 | 0 | 0 | 0   | 0 | 449 | 0 | 0   | 0 |
| 1 | 0 | 0 | 1   | 0 | 0   | 2 | 0   | 1 |
| 0 | 0 | 0 | 0   | 0 | 0   | 0 | 0   | 0 |
| 0 | 1 | 0 | 0   | 0 | 0   | 0 | 0   | 0 |
| 0 | 0 | 0 | 0   | 0 | 0   | 0 | 0   | 0 |
| 0 | 0 | 0 | 0   | 0 | 2   | 0 | 0   | 0 |
| 0 | 0 | 0 | 0   | 0 | 0   | 0 | 0   | 0 |
| 0 | 0 | 0 | 0   | 0 | 0   | 0 | 0   | 0 |
| 0 | 0 | 0 | 0   | 0 | 0   | 0 | 0   | 0 |
| 0 | 0 | 0 | 0   | 0 | 0   | 0 | 4   | 0 |
| 5 | 0 | 0 | 0   | 0 | 0   | 0 | 0   | 0 |
| 0 | 0 | 0 | 0   | 0 | 0   | 0 | 0   | 0 |
| 0 | 0 | 0 | 0   | 0 | 0   | 0 | 0   | 0 |
| 0 | 0 | 0 | 0   | 0 | 0   | 0 | 0   | 0 |
| 0 | 0 | 0 | 0   | 0 | 0   | 0 | 0   | 0 |
| 0 | 0 | 0 | 0   | 0 | 0   | 0 | 0   | 0 |
| 0 | 0 | 0 | 0   | 0 | 0   | 0 | 0   | 0 |
| 0 | 0 | 0 | 0   | 0 | 2   | 0 | 0   | 0 |
| 0 | 0 | 0 | 0   | 0 | 0   | 0 | 0   | 2 |
| 0 | 0 | 0 | 0   | 0 | 0   | 0 | 0   | 0 |
| 0 | 0 | 0 | 0   | 0 | 0   | 0 | 0   | 0 |
| 0 | 0 | 0 | 0   | 0 | 0   | 0 | 0   | 0 |
| 2 | 0 | 0 | 7   | 0 | 0   | 0 | 2   | 0 |
| 0 | 0 | 0 | 0   | 0 | 0   | 0 | 0   | 0 |
| 0 | 0 | 0 | 0   | 0 | 0   | 0 | 0   | 0 |
| 0 | 0 | 0 | 0   | 0 | 2   | 0 | 0   | 0 |
| 0 | 0 | 3 | 6   | 0 | 5   | 0 | 0   | 0 |
| 0 | 0 | 0 | 0   | 0 | 0   | 0 | 0   | 0 |
| 0 | 0 | 0 | 0   | 0 | 0   | 0 | 0   | 0 |
| 0 | 0 | 0 | 0   | 0 | 0   | 0 | 0   | 0 |
| 0 | 0 | 0 | 0   | 0 | 0   | 0 | 0   | 0 |
| 0 | 0 | 0 | 0   | 0 | 0   | 0 | 0   | 0 |
| 0 | 0 | 0 | 0   | 0 | 0   | 0 | 0   | 0 |
| 0 | 0 | 0 | 0   | 0 | 0   | 0 | 0   | 0 |
| 0 | 0 | 0 | 0   | 0 | 0   | 0 | 0   | 0 |
| 1 | 0 | 0 | 0   | 4 | 0   | 0 | 0   | 0 |
| 0 | 0 | 0 | 0   | 0 | 0   | 0 | 0   | 0 |
| 0 | 0 | 0 | 0   | 0 | 0   | 0 | 0   | 0 |
| 0 | 0 | 0 | 0   | 0 | 0   | 0 | 0   | 0 |
| 0 | 0 | 0 | 0   | 0 | 0   | 0 | 0   | 6 |
| 0 | 0 | 0 | 0   | 0 | 0   | 0 | 0   | 0 |
| 0 | 0 | 0 | 0   | 0 | 0   | 0 | 0   | 0 |
| 0 | 0 | 0 | 0   | 0 | 9   | 0 | 0   | 0 |



|   |    |   |    |   |    |   |    |   |
|---|----|---|----|---|----|---|----|---|
| 0 | 0  | 0 | 0  | 0 | 0  | 0 | 0  | 0 |
| 0 | 0  | 0 | 0  | 0 | 0  | 0 | 0  | 5 |
| 0 | 0  | 0 | 0  | 0 | 0  | 0 | 0  | 0 |
| 0 | 0  | 0 | 0  | 0 | 2  | 0 | 0  | 0 |
| 0 | 0  | 0 | 0  | 0 | 0  | 0 | 0  | 0 |
| 0 | 0  | 0 | 0  | 0 | 0  | 0 | 0  | 0 |
| 0 | 0  | 0 | 0  | 0 | 0  | 0 | 0  | 0 |
| 0 | 5  | 0 | 3  | 0 | 1  | 0 | 0  | 9 |
| 0 | 0  | 0 | 0  | 0 | 0  | 0 | 0  | 1 |
| 0 | 0  | 0 | 0  | 0 | 3  | 0 | 0  | 0 |
| 1 | 1  | 0 | 0  | 0 | 0  | 0 | 0  | 2 |
| 0 | 0  | 0 | 0  | 0 | 0  | 0 | 0  | 0 |
| 0 | 0  | 0 | 0  | 0 | 0  | 0 | 0  | 0 |
| 0 | 0  | 0 | 0  | 0 | 2  | 0 | 0  | 0 |
| 0 | 0  | 0 | 1  | 0 | 0  | 0 | 0  | 0 |
| 0 | 0  | 0 | 0  | 0 | 4  | 0 | 0  | 0 |
| 0 | 0  | 0 | 0  | 0 | 0  | 2 | 0  | 0 |
| 0 | 0  | 0 | 0  | 0 | 0  | 0 | 0  | 0 |
| 0 | 0  | 0 | 0  | 0 | 0  | 0 | 0  | 0 |
| 0 | 0  | 0 | 0  | 0 | 0  | 0 | 0  | 0 |
| 0 | 0  | 0 | 0  | 0 | 0  | 0 | 0  | 0 |
| 0 | 0  | 0 | 0  | 0 | 0  | 0 | 0  | 0 |
| 0 | 0  | 0 | 0  | 0 | 0  | 0 | 0  | 0 |
| 0 | 0  | 0 | 0  | 0 | 2  | 0 | 0  | 0 |
| 0 | 0  | 0 | 0  | 0 | 0  | 3 | 0  | 0 |
| 0 | 0  | 0 | 0  | 0 | 0  | 0 | 0  | 0 |
| 0 | 0  | 0 | 0  | 0 | 0  | 0 | 0  | 0 |
| 7 | 3  | 7 | 4  | 9 | 0  | 0 | 19 | 0 |
| 0 | 0  | 0 | 0  | 0 | 0  | 0 | 1  | 0 |
| 0 | 0  | 0 | 0  | 0 | 0  | 0 | 0  | 0 |
| 0 | 0  | 0 | 0  | 0 | 0  | 0 | 0  | 0 |
| 0 | 0  | 0 | 0  | 0 | 0  | 0 | 0  | 0 |
| 0 | 0  | 0 | 0  | 0 | 0  | 0 | 0  | 0 |
| 0 | 0  | 0 | 0  | 0 | 0  | 0 | 6  | 0 |
| 0 | 0  | 0 | 0  | 0 | 0  | 0 | 0  | 0 |
| 0 | 0  | 0 | 0  | 0 | 0  | 0 | 0  | 0 |
| 0 | 0  | 0 | 0  | 0 | 0  | 0 | 0  | 0 |
| 0 | 0  | 0 | 0  | 0 | 0  | 0 | 0  | 0 |
| 0 | 0  | 0 | 10 | 0 | 0  | 0 | 0  | 0 |
| 0 | 2  | 0 | 0  | 0 | 0  | 0 | 0  | 0 |
| 0 | 3  | 2 | 0  | 1 | 0  | 0 | 0  | 3 |
| 0 | 0  | 0 | 0  | 0 | 0  | 0 | 0  | 0 |
| 8 | 6  | 4 | 3  | 0 | 1  | 0 | 3  | 0 |
| 0 | 3  | 0 | 0  | 0 | 0  | 0 | 0  | 0 |
| 0 | 22 | 0 | 0  | 0 | 44 | 0 | 0  | 0 |
| 0 | 0  | 0 | 0  | 0 | 0  | 0 | 0  | 0 |
| 0 | 0  | 0 | 0  | 0 | 0  | 0 | 0  | 0 |
| 0 | 0  | 0 | 0  | 0 | 0  | 0 | 0  | 0 |
| 0 | 0  | 0 | 0  | 0 | 0  | 0 | 0  | 0 |
| 0 | 0  | 0 | 0  | 0 | 0  | 0 | 0  | 0 |
| 0 | 2  | 0 | 0  | 0 | 1  | 0 | 0  | 5 |
| 0 | 0  | 0 | 0  | 0 | 0  | 0 | 0  | 0 |
| 0 | 1  | 0 | 0  | 0 | 0  | 0 | 0  | 0 |





|     |    |    |    |      |     |   |   |   |
|-----|----|----|----|------|-----|---|---|---|
| 204 | 0  | 1  | 0  | 0    | 0   | 0 | 0 | 0 |
| 690 | 1  | 0  | 0  | 0    | 4   | 0 | 0 | 1 |
| 0   | 0  | 0  | 0  | 0    | 0   | 0 | 0 | 0 |
| 0   | 0  | 0  | 0  | 0    | 0   | 0 | 0 | 0 |
| 2   | 0  | 0  | 0  | 0    | 1   | 0 | 0 | 0 |
| 0   | 0  | 0  | 0  | 0    | 1   | 0 | 0 | 0 |
| 0   | 18 | 0  | 0  | 0    | 0   | 0 | 0 | 0 |
| 0   | 0  | 0  | 23 | 0    | 10  | 0 | 0 | 0 |
| 0   | 0  | 0  | 0  | 0    | 2   | 0 | 0 | 0 |
| 0   | 0  | 0  | 1  | 3    | 0   | 0 | 0 | 1 |
| 2   | 3  | 14 | 0  | 10   | 0   | 0 | 0 | 0 |
| 0   | 0  | 0  | 0  | 0    | 0   | 1 | 0 | 0 |
| 0   | 0  | 0  | 0  | 0    | 0   | 0 | 0 | 0 |
| 0   | 0  | 0  | 0  | 0    | 0   | 0 | 0 | 0 |
| 0   | 0  | 0  | 0  | 0    | 23  | 0 | 0 | 0 |
| 0   | 0  | 0  | 0  | 0    | 0   | 0 | 0 | 0 |
| 0   | 0  | 0  | 0  | 0    | 14  | 0 | 0 | 0 |
| 0   | 0  | 0  | 0  | 0    | 0   | 0 | 0 | 0 |
| 0   | 0  | 0  | 0  | 0    | 0   | 0 | 0 | 0 |
| 2   | 0  | 0  | 2  | 0    | 0   | 0 | 1 | 0 |
| 0   | 0  | 0  | 1  | 0    | 0   | 0 | 0 | 0 |
| 0   | 0  | 0  | 0  | 0    | 0   | 0 | 0 | 0 |
| 0   | 0  | 0  | 0  | 0    | 0   | 0 | 0 | 0 |
| 793 | 0  | 0  | 0  | 1068 | 26  | 0 | 0 | 1 |
| 0   | 0  | 0  | 9  | 0    | 0   | 0 | 0 | 0 |
| 0   | 0  | 0  | 0  | 0    | 89  | 0 | 0 | 0 |
| 0   | 0  | 0  | 0  | 0    | 0   | 0 | 0 | 0 |
| 0   | 0  | 0  | 0  | 0    | 0   | 2 | 1 | 0 |
| 1   | 0  | 0  | 0  | 0    | 0   | 0 | 0 | 0 |
| 0   | 0  | 0  | 0  | 0    | 0   | 0 | 0 | 0 |
| 0   | 0  | 0  | 0  | 0    | 3   | 0 | 0 | 0 |
| 0   | 0  | 0  | 0  | 0    | 0   | 0 | 0 | 0 |
| 0   | 0  | 0  | 0  | 0    | 1   | 0 | 0 | 0 |
| 0   | 0  | 0  | 0  | 0    | 0   | 0 | 0 | 0 |
| 0   | 0  | 0  | 0  | 0    | 1   | 0 | 0 | 0 |
| 0   | 0  | 0  | 0  | 0    | 0   | 0 | 0 | 0 |
| 0   | 0  | 0  | 0  | 0    | 0   | 0 | 0 | 0 |
| 0   | 0  | 0  | 0  | 0    | 0   | 0 | 0 | 0 |
| 0   | 0  | 0  | 0  | 0    | 0   | 0 | 0 | 0 |
| 0   | 0  | 0  | 0  | 0    | 0   | 0 | 0 | 0 |
| 0   | 0  | 0  | 0  | 0    | 0   | 0 | 0 | 0 |
| 0   | 0  | 0  | 0  | 0    | 0   | 0 | 0 | 0 |
| 2   | 0  | 3  | 0  | 0    | 0   | 0 | 2 | 0 |
| 0   | 0  | 0  | 0  | 0    | 0   | 0 | 0 | 1 |
| 0   | 0  | 0  | 0  | 0    | 0   | 0 | 0 | 0 |
| 0   | 0  | 0  | 0  | 0    | 0   | 0 | 0 | 0 |
| 0   | 0  | 0  | 0  | 0    | 0   | 0 | 0 | 0 |
| 0   | 0  | 0  | 0  | 0    | 0   | 0 | 0 | 0 |
| 0   | 0  | 0  | 0  | 0    | 0   | 0 | 0 | 0 |
| 0   | 0  | 0  | 33 | 0    | 0   | 0 | 0 | 0 |
| 0   | 0  | 0  | 0  | 0    | 0   | 0 | 0 | 0 |
| 0   | 0  | 0  | 0  | 0    | 0   | 0 | 0 | 0 |
| 0   | 0  | 0  | 0  | 0    | 0   | 0 | 0 | 0 |
| 0   | 0  | 2  | 0  | 0    | 0   | 0 | 2 | 0 |
| 0   | 0  | 0  | 0  | 0    | 0   | 0 | 0 | 0 |
| 0   | 2  | 0  | 0  | 0    | 0   | 0 | 0 | 0 |
| 0   | 54 | 0  | 0  | 0    | 8   | 0 | 0 | 0 |
| 0   | 0  | 0  | 0  | 0    | 314 | 0 | 0 | 1 |











|     |     |   |    |   |     |   |   |   |
|-----|-----|---|----|---|-----|---|---|---|
| 0   | 0   | 0 | 0  | 0 | 0   | 0 | 0 | 0 |
| 0   | 0   | 0 | 0  | 0 | 0   | 0 | 0 | 0 |
| 0   | 0   | 0 | 0  | 0 | 0   | 0 | 0 | 0 |
| 0   | 1   | 0 | 0  | 1 | 0   | 0 | 0 | 0 |
| 0   | 0   | 1 | 0  | 0 | 0   | 0 | 0 | 0 |
| 0   | 0   | 1 | 1  | 4 | 0   | 0 | 0 | 1 |
| 0   | 0   | 0 | 0  | 0 | 0   | 0 | 0 | 0 |
| 0   | 0   | 0 | 0  | 0 | 0   | 0 | 0 | 0 |
| 0   | 0   | 0 | 0  | 0 | 0   | 0 | 0 | 0 |
| 0   | 0   | 0 | 0  | 0 | 0   | 2 | 0 | 0 |
| 4   | 0   | 0 | 0  | 0 | 0   | 0 | 0 | 0 |
| 0   | 0   | 0 | 0  | 0 | 0   | 0 | 0 | 0 |
| 0   | 0   | 0 | 0  | 0 | 0   | 0 | 0 | 0 |
| 0   | 0   | 0 | 0  | 0 | 0   | 0 | 0 | 0 |
| 0   | 0   | 0 | 0  | 0 | 0   | 0 | 0 | 1 |
| 0   | 0   | 0 | 0  | 0 | 0   | 0 | 0 | 0 |
| 0   | 0   | 1 | 1  | 0 | 0   | 0 | 0 | 0 |
| 0   | 0   | 0 | 0  | 0 | 0   | 0 | 0 | 0 |
| 0   | 0   | 0 | 0  | 0 | 1   | 0 | 0 | 0 |
| 0   | 0   | 0 | 0  | 0 | 0   | 0 | 1 | 0 |
| 0   | 0   | 0 | 0  | 0 | 0   | 0 | 0 | 0 |
| 0   | 0   | 0 | 0  | 0 | 0   | 0 | 0 | 0 |
| 1   | 1   | 0 | 0  | 1 | 0   | 1 | 0 | 0 |
| 0   | 0   | 0 | 0  | 0 | 0   | 0 | 0 | 0 |
| 0   | 0   | 0 | 0  | 0 | 0   | 0 | 0 | 0 |
| 0   | 0   | 0 | 1  | 0 | 0   | 0 | 0 | 0 |
| 0   | 0   | 0 | 0  | 0 | 0   | 0 | 0 | 0 |
| 0   | 0   | 0 | 0  | 0 | 0   | 0 | 0 | 0 |
| 0   | 0   | 0 | 0  | 0 | 0   | 0 | 0 | 0 |
| 0   | 0   | 0 | 0  | 0 | 1   | 0 | 0 | 0 |
| 0   | 0   | 0 | 0  | 0 | 0   | 0 | 0 | 0 |
| 0   | 0   | 0 | 0  | 0 | 0   | 0 | 0 | 0 |
| 0   | 0   | 0 | 0  | 0 | 0   | 0 | 0 | 0 |
| 0   | 0   | 0 | 0  | 0 | 0   | 0 | 0 | 0 |
| 0   | 0   | 0 | 0  | 0 | 0   | 0 | 0 | 0 |
| 0   | 0   | 0 | 0  | 0 | 0   | 0 | 0 | 0 |
| 0   | 0   | 0 | 0  | 0 | 1   | 0 | 0 | 0 |
| 0   | 0   | 0 | 0  | 0 | 5   | 0 | 1 | 0 |
| 0   | 0   | 0 | 0  | 0 | 0   | 0 | 0 | 0 |
| 0   | 0   | 0 | 0  | 0 | 0   | 0 | 0 | 0 |
| 0   | 0   | 0 | 0  | 0 | 0   | 0 | 0 | 0 |
| 0   | 0   | 0 | 0  | 0 | 0   | 0 | 0 | 0 |
| 0   | 1   | 0 | 0  | 0 | 0   | 0 | 1 | 0 |
| 0   | 1   | 0 | 0  | 0 | 0   | 0 | 0 | 0 |
| 0   | 0   | 0 | 0  | 0 | 0   | 0 | 0 | 0 |
| 0   | 0   | 0 | 0  | 0 | 1   | 0 | 0 | 0 |
| 0   | 0   | 0 | 0  | 1 | 0   | 6 | 0 | 1 |
| 0   | 0   | 0 | 0  | 0 | 0   | 0 | 0 | 0 |
| 4   | 3   | 0 | 1  | 1 | 0   | 0 | 1 | 0 |
| 34  | 0   | 0 | 0  | 0 | 1   | 0 | 0 | 0 |
| 0   | 0   | 0 | 0  | 0 | 1   | 0 | 0 | 0 |
| 1   | 0   | 0 | 0  | 0 | 0   | 0 | 0 | 0 |
| 0   | 0   | 0 | 1  | 0 | 0   | 0 | 2 | 0 |
| 0   | 0   | 0 | 0  | 0 | 0   | 0 | 0 | 0 |
| 0   | 0   | 0 | 0  | 0 | 0   | 0 | 0 | 1 |
| 0   | 0   | 0 | 0  | 0 | 0   | 0 | 0 | 0 |
| 199 | 181 | 0 | 38 | 7 | 168 | 0 | 0 | 0 |













































|   |   |   |   |   |   |   |   |   |
|---|---|---|---|---|---|---|---|---|
| 0 | 0 | 0 | 0 | 0 | 0 | 0 | 0 | 0 |
| 0 | 0 | 0 | 0 | 0 | 0 | 0 | 2 | 0 |
| 0 | 0 | 0 | 0 | 0 | 0 | 0 | 0 | 0 |
| 0 | 0 | 0 | 0 | 0 | 0 | 0 | 0 | 0 |
| 0 | 0 | 0 | 0 | 0 | 0 | 0 | 0 | 0 |
| 0 | 0 | 0 | 0 | 0 | 0 | 0 | 0 | 0 |
| 0 | 0 | 0 | 0 | 0 | 0 | 0 | 0 | 0 |
| 0 | 0 | 0 | 0 | 0 | 0 | 0 | 0 | 0 |
| 0 | 0 | 0 | 0 | 0 | 0 | 0 | 0 | 0 |
| 0 | 0 | 0 | 0 | 0 | 0 | 0 | 0 | 0 |
| 0 | 0 | 0 | 0 | 0 | 0 | 0 | 0 | 0 |
| 0 | 0 | 0 | 0 | 0 | 0 | 0 | 0 | 0 |
| 1 | 0 | 0 | 0 | 0 | 0 | 0 | 0 | 0 |
| 0 | 0 | 1 | 0 | 1 | 0 | 1 | 0 | 0 |
| 0 | 0 | 0 | 0 | 0 | 0 | 0 | 0 | 0 |
| 0 | 0 | 0 | 0 | 0 | 0 | 0 | 0 | 0 |
| 0 | 0 | 0 | 0 | 0 | 0 | 0 | 0 | 0 |
| 0 | 0 | 0 | 0 | 0 | 4 | 0 | 0 | 0 |
| 0 | 0 | 0 | 0 | 0 | 0 | 0 | 0 | 0 |
| 0 | 0 | 0 | 0 | 0 | 0 | 0 | 0 | 0 |
| 0 | 0 | 0 | 0 | 0 | 0 | 2 | 0 | 0 |
| 0 | 0 | 0 | 0 | 0 | 0 | 0 | 0 | 0 |
| 0 | 0 | 0 | 0 | 0 | 0 | 0 | 0 | 0 |
| 0 | 0 | 0 | 0 | 0 | 0 | 0 | 0 | 0 |
| 0 | 0 | 0 | 0 | 0 | 0 | 0 | 0 | 0 |
| 0 | 0 | 0 | 0 | 0 | 0 | 0 | 0 | 0 |
| 0 | 0 | 0 | 0 | 0 | 0 | 0 | 0 | 0 |
| 0 | 0 | 0 | 0 | 0 | 0 | 0 | 0 | 0 |
| 0 | 0 | 0 | 0 | 0 | 0 | 0 | 0 | 0 |
| 0 | 0 | 0 | 0 | 0 | 0 | 0 | 0 | 0 |
| 0 | 0 | 0 | 0 | 0 | 0 | 0 | 0 | 0 |
| 0 | 0 | 0 | 0 | 0 | 0 | 0 | 0 | 0 |
| 0 | 0 | 0 | 0 | 0 | 0 | 0 | 0 | 0 |
| 0 | 0 | 0 | 0 | 0 | 0 | 0 | 0 | 0 |
| 0 | 0 | 0 | 0 | 0 | 0 | 0 | 0 | 0 |
| 0 | 0 | 0 | 0 | 0 | 0 | 0 | 0 | 0 |
| 0 | 0 | 0 | 0 | 0 | 0 | 0 | 0 | 0 |
| 0 | 0 | 0 | 0 | 0 | 0 | 0 | 0 | 0 |
| 0 | 0 | 0 | 0 | 0 | 0 | 0 | 0 | 0 |
| 0 | 0 | 0 | 0 | 0 | 0 | 0 | 0 | 0 |
| 0 | 0 | 0 | 0 | 0 | 0 | 0 | 0 | 0 |
| 0 | 0 | 0 | 0 | 0 | 0 | 0 | 0 | 0 |
| 0 | 0 | 0 | 0 | 0 | 0 | 0 | 0 | 0 |
| 0 | 0 | 0 | 0 | 0 | 0 | 0 | 0 | 0 |
| 0 | 0 | 0 | 0 | 0 | 0 | 0 | 0 | 0 |
| 0 | 0 | 0 | 0 | 0 | 0 | 0 | 0 | 0 |
| 0 | 0 | 0 | 0 | 0 | 0 | 0 | 0 | 0 |
| 0 | 0 | 0 | 0 | 0 | 1 | 0 | 0 | 0 |
| 0 | 0 | 0 | 0 | 0 | 0 | 0 | 0 | 0 |
| 0 | 0 | 0 | 0 | 1 | 0 | 0 | 0 | 0 |
| 0 | 0 | 0 | 0 | 0 | 0 | 0 | 0 | 0 |
| 0 | 0 | 0 | 2 | 0 | 0 | 0 | 0 | 0 |
| 0 | 1 | 0 | 0 | 0 | 0 | 0 | 0 | 0 |



















|   |   |   |   |   |   |   |   |   |
|---|---|---|---|---|---|---|---|---|
| 0 | 0 | 0 | 0 | 0 | 0 | 0 | 0 | 0 |
| 0 | 0 | 2 | 0 | 0 | 0 | 0 | 0 | 0 |
| 0 | 0 | 0 | 0 | 0 | 0 | 0 | 0 | 0 |
| 0 | 0 | 0 | 0 | 0 | 0 | 0 | 0 | 0 |
| 1 | 0 | 0 | 0 | 0 | 0 | 0 | 1 | 0 |
| 0 | 0 | 0 | 0 | 0 | 0 | 0 | 0 | 0 |
| 0 | 1 | 0 | 0 | 0 | 0 | 0 | 0 | 0 |
| 0 | 0 | 0 | 0 | 0 | 0 | 0 | 0 | 0 |
| 0 | 0 | 1 | 0 | 0 | 1 | 0 | 0 | 0 |
| 0 | 6 | 0 | 0 | 0 | 0 | 0 | 0 | 0 |
| 0 | 0 | 0 | 0 | 0 | 0 | 0 | 0 | 0 |
| 0 | 0 | 0 | 0 | 0 | 0 | 0 | 0 | 0 |
| 0 | 0 | 0 | 0 | 0 | 0 | 0 | 0 | 0 |
| 0 | 0 | 0 | 0 | 0 | 0 | 0 | 0 | 0 |
| 0 | 0 | 0 | 0 | 0 | 0 | 0 | 0 | 0 |
| 0 | 0 | 0 | 0 | 0 | 0 | 0 | 0 | 0 |
| 1 | 0 | 0 | 0 | 0 | 0 | 0 | 0 | 0 |
| 0 | 0 | 0 | 0 | 0 | 0 | 0 | 0 | 0 |
| 0 | 0 | 0 | 0 | 0 | 0 | 0 | 0 | 0 |
| 0 | 0 | 0 | 0 | 0 | 1 | 0 | 0 | 0 |
| 0 | 0 | 0 | 0 | 0 | 0 | 0 | 0 | 1 |
| 0 | 0 | 0 | 0 | 0 | 0 | 0 | 0 | 0 |
| 1 | 0 | 0 | 0 | 0 | 0 | 0 | 0 | 0 |
| 0 | 0 | 0 | 0 | 0 | 0 | 0 | 0 | 0 |
| 0 | 0 | 0 | 0 | 0 | 0 | 0 | 0 | 0 |
| 0 | 0 | 0 | 0 | 0 | 0 | 0 | 0 | 0 |
| 0 | 0 | 0 | 0 | 0 | 0 | 0 | 0 | 0 |
| 0 | 0 | 0 | 0 | 0 | 0 | 0 | 0 | 0 |
| 0 | 0 | 0 | 0 | 0 | 0 | 0 | 0 | 0 |
| 0 | 0 | 0 | 0 | 1 | 0 | 0 | 0 | 0 |
| 0 | 0 | 0 | 0 | 0 | 0 | 0 | 0 | 0 |
| 0 | 0 | 0 | 0 | 0 | 0 | 0 | 0 | 0 |
| 0 | 0 | 0 | 0 | 0 | 0 | 0 | 0 | 0 |
| 0 | 0 | 0 | 0 | 0 | 0 | 0 | 0 | 0 |
| 0 | 0 | 0 | 0 | 0 | 0 | 0 | 0 | 0 |
| 0 | 0 | 0 | 0 | 0 | 0 | 0 | 0 | 0 |
| 0 | 0 | 0 | 0 | 0 | 0 | 0 | 1 | 0 |
| 0 | 0 | 2 | 0 | 2 | 0 | 0 | 0 | 0 |
| 1 | 0 | 0 | 0 | 0 | 0 | 0 | 0 | 0 |
| 0 | 0 | 2 | 0 | 0 | 0 | 0 | 0 | 0 |
| 0 | 0 | 0 | 0 | 0 | 0 | 0 | 0 | 0 |
| 0 | 0 | 0 | 0 | 0 | 1 | 0 | 0 | 0 |
| 0 | 0 | 0 | 0 | 0 | 0 | 0 | 1 | 0 |
| 0 | 0 | 0 | 0 | 0 | 0 | 0 | 0 | 0 |
| 0 | 0 | 1 | 0 | 0 | 0 | 0 | 0 | 0 |
| 0 | 0 | 0 | 0 | 0 | 0 | 0 | 0 | 0 |
| 0 | 0 | 0 | 0 | 0 | 1 | 0 | 0 | 0 |
| 0 | 0 | 0 | 0 | 0 | 0 | 0 | 0 | 0 |
| 0 | 0 | 0 | 0 | 0 | 0 | 0 | 0 | 0 |
| 0 | 0 | 0 | 0 | 0 | 0 | 0 | 0 | 0 |
| 0 | 0 | 0 | 0 | 0 | 0 | 2 | 0 | 0 |
| 0 | 0 | 0 | 0 | 0 | 0 | 0 | 0 | 0 |
| 0 | 0 | 0 | 0 | 0 | 0 | 0 | 2 | 0 |
| 0 | 0 | 0 | 3 | 0 | 0 | 0 | 0 | 0 |
| 1 | 0 | 0 | 0 | 0 | 0 | 0 | 0 | 0 |
| 0 | 0 | 0 | 0 | 0 | 0 | 0 | 0 | 0 |
| 0 | 0 | 0 | 0 | 0 | 1 | 0 | 0 | 0 |
| 0 | 1 | 0 | 0 | 0 | 0 | 0 | 1 | 0 |













































|      |      |      |      |      |      |      |      |      |
|------|------|------|------|------|------|------|------|------|
| 0    | 0    | 0    | 0    | 0    | 0    | 0    | 0    | 2    |
| 0    | 0    | 0    | 0    | 0    | 0    | 0    | 0    | 0    |
| 2    | 0    | 0    | 0    | 0    | 0    | 0    | 0    | 0    |
| 0    | 0    | 0    | 0    | 0    | 1    | 0    | 0    | 0    |
| 0    | 0    | 0    | 0    | 0    | 0    | 0    | 0    | 0    |
| 0    | 0    | 0    | 0    | 0    | 0    | 0    | 0    | 0    |
| 19   | 2    | 9    | 0    | 0    | 2    | 0    | 0    | 0    |
| 0    | 0    | 0    | 0    | 0    | 0    | 0    | 0    | 0    |
| 0    | 0    | 0    | 0    | 0    | 0    | 0    | 0    | 0    |
| 0    | 0    | 0    | 0    | 0    | 0    | 0    | 0    | 0    |
| 0    | 0    | 0    | 0    | 0    | 0    | 0    | 0    | 0    |
| 0    | 0    | 0    | 0    | 0    | 0    | 0    | 0    | 0    |
| 0    | 2    | 0    | 0    | 0    | 0    | 0    | 0    | 0    |
| 0    | 1    | 0    | 0    | 0    | 0    | 0    | 0    | 0    |
| 0    | 0    | 0    | 0    | 0    | 0    | 1    | 0    | 0    |
| 0    | 0    | 0    | 4    | 0    | 0    | 0    | 0    | 0    |
| 0    | 0    | 0    | 0    | 0    | 0    | 0    | 0    | 0    |
| 0    | 0    | 0    | 1    | 0    | 0    | 0    | 0    | 0    |
| 0    | 0    | 0    | 0    | 0    | 0    | 0    | 0    | 0    |
| 0    | 0    | 0    | 0    | 0    | 0    | 0    | 0    | 0    |
| 0    | 0    | 0    | 0    | 0    | 0    | 0    | 0    | 0    |
| 0    | 0    | 0    | 0    | 0    | 0    | 0    | 0    | 0    |
| 0    | 0    | 0    | 0    | 0    | 0    | 0    | 0    | 0    |
| 0    | 0    | 0    | 0    | 0    | 0    | 0    | 0    | 0    |
| 0    | 0    | 0    | 0    | 0    | 0    | 0    | 0    | 0    |
| 0    | 0    | 0    | 0    | 0    | 0    | 0    | 0    | 0    |
| 0    | 0    | 0    | 0    | 0    | 0    | 0    | 0    | 0    |
| 0    | 0    | 0    | 0    | 0    | 0    | 0    | 0    | 0    |
| 0    | 0    | 0    | 0    | 0    | 0    | 0    | 0    | 0    |
| 0    | 0    | 0    | 0    | 0    | 0    | 0    | 0    | 0    |
| 0    | 0    | 0    | 0    | 0    | 0    | 0    | 0    | 0    |
| 0    | 0    | 0    | 0    | 0    | 0    | 0    | 0    | 0    |
| 0    | 0    | 0    | 0    | 0    | 0    | 0    | 0    | 0    |
| 0    | 0    | 0    | 0    | 0    | 0    | 0    | 0    | 0    |
| 0    | 0    | 0    | 0    | 0    | 0    | 0    | 0    | 0    |
| 0    | 0    | 0    | 0    | 0    | 0    | 0    | 0    | 0    |
| 0    | 0    | 0    | 0    | 0    | 0    | 0    | 0    | 0    |
| 0    | 0    | 0    | 0    | 0    | 0    | 0    | 0    | 0    |
| 0    | 0    | 0    | 0    | 0    | 0    | 0    | 0    | 0    |
| 0    | 0    | 0    | 0    | 0    | 0    | 0    | 0    | 0    |
| 0    | 0    | 0    | 0    | 0    | 0    | 0    | 0    | 0    |
| 0    | 0    | 0    | 0    | 0    | 0    | 0    | 0    | 0    |
| 0    | 0    | 0    | 0    | 0    | 0    | 0    | 0    | 0    |
| 0    | 0    | 0    | 0    | 0    | 0    | 0    | 0    | 0    |
| 0    | 0    | 0    | 0    | 0    | 0    | 0    | 0    | 0    |
| 0    | 0    | 0    | 0    | 0    | 0    | 0    | 0    | 0    |
| 0    | 0    | 0    | 0    | 0    | 0    | 0    | 0    | 0    |
| 0    | 0    | 0    | 0    | 0    | 0    | 0    | 0    | 0    |
| 1    | 0    | 0    | 0    | 0    | 0    | 0    | 0    | 0    |
| 0    | 0    | 0    | 0    | 0    | 0    | 0    | 0    | 0    |
| 0    | 0    | 0    | 0    | 0    | 0    | 0    | 0    | 0    |
| 0    | 0    | 0    | 0    | 0    | 0    | 0    | 0    | 0    |
| 8641 | 8385 | 6977 | 5615 | 6061 | 6417 | 8480 | 8306 | 8154 |





|      |    |     |     |    |     |     |    |      |
|------|----|-----|-----|----|-----|-----|----|------|
| 0    | 0  | 0   | 0   | 0  | 3   | 0   | 0  | 0    |
| 0    | 11 | 0   | 8   | 1  | 0   | 1   | 0  | 0    |
| 0    | 0  | 0   | 0   | 0  | 0   | 0   | 0  | 0    |
| 0    | 0  | 0   | 0   | 2  | 0   | 0   | 0  | 0    |
| 0    | 0  | 0   | 0   | 0  | 0   | 0   | 4  | 0    |
| 0    | 0  | 0   | 0   | 0  | 0   | 0   | 0  | 0    |
| 0    | 0  | 0   | 0   | 0  | 0   | 0   | 0  | 0    |
| 0    | 0  | 0   | 0   | 0  | 0   | 0   | 0  | 0    |
| 0    | 2  | 0   | 0   | 1  | 0   | 0   | 0  | 0    |
| 0    | 0  | 1   | 0   | 1  | 0   | 0   | 7  | 0    |
| 0    | 0  | 0   | 0   | 0  | 0   | 0   | 0  | 0    |
| 0    | 0  | 0   | 1   | 0  | 0   | 0   | 0  | 0    |
| 0    | 0  | 0   | 0   | 0  | 0   | 0   | 0  | 0    |
| 0    | 0  | 0   | 0   | 0  | 0   | 0   | 0  | 0    |
| 0    | 0  | 0   | 0   | 0  | 3   | 0   | 0  | 0    |
| 0    | 1  | 0   | 1   | 0  | 0   | 1   | 0  | 0    |
| 0    | 0  | 0   | 0   | 0  | 0   | 0   | 0  | 0    |
| 0    | 0  | 0   | 0   | 0  | 0   | 0   | 0  | 0    |
| 0    | 0  | 0   | 0   | 0  | 0   | 0   | 0  | 0    |
| 0    | 0  | 0   | 0   | 0  | 0   | 0   | 0  | 0    |
| 1    | 0  | 0   | 0   | 0  | 0   | 0   | 0  | 0    |
| 0    | 0  | 0   | 0   | 0  | 0   | 0   | 0  | 0    |
| 0    | 0  | 0   | 0   | 0  | 0   | 0   | 0  | 0    |
| 0    | 0  | 0   | 2   | 0  | 0   | 0   | 0  | 0    |
| 0    | 0  | 0   | 0   | 0  | 0   | 0   | 0  | 0    |
| 0    | 0  | 0   | 0   | 0  | 0   | 0   | 0  | 0    |
| 0    | 0  | 0   | 104 | 0  | 0   | 0   | 0  | 0    |
| 0    | 0  | 0   | 0   | 0  | 0   | 2   | 0  | 0    |
| 0    | 0  | 0   | 0   | 0  | 0   | 0   | 0  | 0    |
| 0    | 0  | 2   | 0   | 0  | 0   | 0   | 0  | 0    |
| 0    | 0  | 0   | 0   | 0  | 0   | 0   | 0  | 0    |
| 0    | 0  | 0   | 0   | 0  | 0   | 0   | 0  | 0    |
| 0    | 0  | 0   | 0   | 0  | 0   | 0   | 0  | 0    |
| 0    | 0  | 0   | 0   | 0  | 0   | 0   | 0  | 0    |
| 0    | 0  | 0   | 0   | 0  | 0   | 0   | 0  | 0    |
| 0    | 0  | 0   | 0   | 0  | 0   | 0   | 0  | 0    |
| 0    | 0  | 0   | 0   | 0  | 0   | 0   | 0  | 0    |
| 0    | 0  | 0   | 0   | 0  | 0   | 0   | 0  | 0    |
| 0    | 0  | 0   | 0   | 0  | 0   | 0   | 0  | 0    |
| 0    | 0  | 0   | 0   | 0  | 0   | 0   | 0  | 0    |
| 0    | 0  | 0   | 0   | 0  | 0   | 0   | 0  | 0    |
| 0    | 0  | 0   | 0   | 0  | 0   | 0   | 0  | 0    |
| 1140 | 4  | 178 | 42  | 14 | 138 | 271 | 53 | 1009 |
| 0    | 0  | 0   | 0   | 0  | 0   | 0   | 0  | 0    |
| 0    | 0  | 0   | 0   | 0  | 0   | 0   | 0  | 0    |
| 0    | 0  | 0   | 0   | 0  | 0   | 0   | 0  | 0    |
| 0    | 0  | 0   | 0   | 0  | 0   | 0   | 0  | 0    |
| 0    | 0  | 0   | 0   | 0  | 0   | 0   | 0  | 0    |
| 0    | 0  | 0   | 0   | 0  | 0   | 0   | 0  | 0    |
| 0    | 0  | 0   | 0   | 0  | 0   | 0   | 0  | 0    |
| 0    | 0  | 0   | 0   | 0  | 0   | 0   | 0  | 0    |
| 0    | 0  | 0   | 0   | 1  | 0   | 0   | 0  | 0    |
| 2    | 2  | 0   | 1   | 1  | 3   | 1   | 4  | 0    |
| 0    | 0  | 3   | 0   | 0  | 1   | 1   | 23 | 0    |
| 0    | 0  | 4   | 0   | 0  | 0   | 0   | 0  | 0    |
| 0    | 0  | 2   | 0   | 0  | 0   | 0   | 0  | 0    |
| 0    | 0  | 0   | 514 | 39 | 0   | 105 | 1  | 0    |
| 0    | 0  | 0   | 1   | 0  | 0   | 0   | 0  | 4    |
| 0    | 0  | 0   | 0   | 0  | 0   | 0   | 0  | 0    |
| 0    | 0  | 0   | 8   | 0  | 0   | 0   | 0  | 0    |
| 0    | 0  | 0   | 9   | 0  | 6   | 0   | 0  | 0    |
| 0    | 0  | 0   | 0   | 0  | 0   | 0   | 0  | 0    |
| 0    | 0  | 0   | 0   | 19 | 0   | 24  | 0  | 0    |









|   |      |    |   |    |     |    |   |     |
|---|------|----|---|----|-----|----|---|-----|
| 0 | 0    | 0  | 0 | 0  | 0   | 0  | 0 | 0   |
| 0 | 0    | 0  | 0 | 0  | 0   | 0  | 0 | 0   |
| 0 | 0    | 0  | 0 | 0  | 0   | 0  | 0 | 0   |
| 0 | 0    | 0  | 0 | 1  | 1   | 0  | 0 | 0   |
| 0 | 0    | 0  | 0 | 0  | 0   | 0  | 0 | 1   |
| 0 | 1369 | 0  | 0 | 10 | 105 | 0  | 0 | 0   |
| 0 | 0    | 0  | 0 | 0  | 0   | 0  | 0 | 0   |
| 0 | 0    | 0  | 0 | 0  | 0   | 0  | 0 | 0   |
| 0 | 0    | 0  | 0 | 3  | 1   | 0  | 0 | 0   |
| 0 | 0    | 3  | 0 | 0  | 0   | 0  | 0 | 0   |
| 0 | 0    | 0  | 0 | 7  | 14  | 0  | 0 | 0   |
| 0 | 0    | 0  | 0 | 0  | 0   | 0  | 0 | 0   |
| 5 | 1    | 38 | 0 | 0  | 0   | 0  | 1 | 1   |
| 0 | 0    | 0  | 0 | 0  | 0   | 0  | 0 | 0   |
| 0 | 0    | 0  | 0 | 0  | 0   | 0  | 0 | 0   |
| 0 | 0    | 0  | 0 | 0  | 0   | 0  | 0 | 0   |
| 0 | 0    | 0  | 0 | 0  | 3   | 0  | 0 | 0   |
| 0 | 0    | 0  | 0 | 0  | 0   | 0  | 0 | 0   |
| 0 | 0    | 0  | 0 | 0  | 0   | 0  | 0 | 0   |
| 2 | 0    | 0  | 0 | 0  | 0   | 0  | 0 | 0   |
| 0 | 0    | 0  | 0 | 0  | 0   | 0  | 0 | 0   |
| 1 | 0    | 0  | 0 | 0  | 0   | 0  | 0 | 1   |
| 0 | 1    | 0  | 0 | 0  | 0   | 0  | 0 | 0   |
| 0 | 0    | 0  | 0 | 0  | 0   | 0  | 0 | 0   |
| 0 | 0    | 0  | 0 | 0  | 0   | 0  | 0 | 0   |
| 0 | 0    | 0  | 0 | 0  | 0   | 0  | 0 | 0   |
| 0 | 0    | 0  | 0 | 0  | 0   | 0  | 0 | 0   |
| 0 | 0    | 0  | 0 | 0  | 0   | 0  | 0 | 0   |
| 0 | 0    | 0  | 0 | 0  | 0   | 0  | 0 | 0   |
| 0 | 18   | 0  | 1 | 0  | 2   | 0  | 0 | 920 |
| 0 | 0    | 0  | 0 | 0  | 0   | 0  | 0 | 0   |
| 0 | 0    | 0  | 0 | 0  | 3   | 0  | 0 | 0   |
| 0 | 0    | 0  | 0 | 0  | 0   | 0  | 0 | 2   |
| 0 | 0    | 0  | 0 | 0  | 0   | 0  | 0 | 0   |
| 0 | 0    | 0  | 0 | 0  | 0   | 0  | 0 | 1   |
| 0 | 0    | 5  | 0 | 0  | 0   | 0  | 0 | 3   |
| 0 | 0    | 0  | 0 | 0  | 0   | 0  | 0 | 0   |
| 0 | 0    | 0  | 0 | 0  | 0   | 0  | 0 | 0   |
| 0 | 0    | 0  | 0 | 0  | 0   | 0  | 0 | 0   |
| 0 | 14   | 0  | 5 | 5  | 2   | 1  | 0 | 0   |
| 0 | 0    | 0  | 0 | 0  | 0   | 0  | 0 | 0   |
| 0 | 0    | 0  | 0 | 0  | 0   | 0  | 0 | 0   |
| 0 | 0    | 0  | 1 | 0  | 0   | 1  | 0 | 0   |
| 0 | 0    | 0  | 1 | 0  | 0   | 1  | 0 | 0   |
| 0 | 33   | 0  | 7 | 5  | 0   | 27 | 0 | 0   |
| 0 | 0    | 0  | 0 | 0  | 0   | 0  | 0 | 0   |
| 1 | 0    | 0  | 0 | 0  | 0   | 1  | 0 | 0   |
| 0 | 0    | 0  | 0 | 0  | 0   | 0  | 0 | 0   |
| 0 | 0    | 0  | 0 | 0  | 0   | 0  | 1 | 0   |
| 0 | 0    | 0  | 3 | 2  | 0   | 0  | 0 | 0   |
| 0 | 1    | 4  | 0 | 1  | 2   | 0  | 0 | 0   |
| 0 | 0    | 0  | 1 | 0  | 0   | 0  | 0 | 0   |
| 0 | 0    | 0  | 0 | 0  | 0   | 0  | 0 | 0   |
| 0 | 0    | 0  | 0 | 0  | 0   | 0  | 0 | 0   |
| 0 | 0    | 0  | 0 | 0  | 0   | 0  | 0 | 0   |
| 0 | 0    | 0  | 0 | 0  | 1   | 0  | 1 | 0   |
| 0 | 0    | 0  | 0 | 1  | 0   | 0  | 3 | 0   |

|     |     |     |    |    |    |     |      |    |
|-----|-----|-----|----|----|----|-----|------|----|
| 24  | 0   | 5   | 4  | 0  | 4  | 2   | 2    | 17 |
| 5   | 0   | 0   | 0  | 0  | 0  | 0   | 0    | 0  |
| 0   | 0   | 0   | 0  | 1  | 0  | 0   | 0    | 0  |
| 0   | 1   | 4   | 0  | 1  | 2  | 0   | 0    | 0  |
| 1   | 0   | 1   | 0  | 0  | 0  | 0   | 1    | 0  |
| 0   | 0   | 0   | 0  | 0  | 0  | 0   | 0    | 0  |
| 0   | 0   | 0   | 0  | 0  | 0  | 0   | 0    | 0  |
| 0   | 0   | 0   | 0  | 0  | 0  | 0   | 0    | 0  |
| 0   | 0   | 0   | 0  | 0  | 0  | 0   | 0    | 0  |
| 0   | 0   | 0   | 0  | 0  | 0  | 0   | 0    | 0  |
| 0   | 0   | 1   | 0  | 0  | 0  | 0   | 0    | 0  |
| 0   | 0   | 0   | 0  | 33 | 0  | 0   | 0    | 0  |
| 0   | 0   | 0   | 0  | 0  | 0  | 0   | 0    | 0  |
| 0   | 0   | 0   | 0  | 0  | 2  | 0   | 0    | 0  |
| 0   | 0   | 0   | 0  | 0  | 0  | 0   | 0    | 0  |
| 0   | 0   | 0   | 1  | 0  | 0  | 0   | 0    | 0  |
| 0   | 0   | 0   | 0  | 0  | 4  | 0   | 0    | 0  |
| 0   | 0   | 0   | 0  | 0  | 0  | 0   | 0    | 0  |
| 0   | 0   | 0   | 0  | 0  | 5  | 1   | 0    | 0  |
| 0   | 0   | 0   | 0  | 0  | 0  | 1   | 0    | 1  |
| 0   | 0   | 0   | 0  | 0  | 0  | 0   | 0    | 0  |
| 0   | 0   | 0   | 0  | 0  | 3  | 0   | 0    | 0  |
| 0   | 0   | 0   | 0  | 0  | 0  | 0   | 0    | 0  |
| 0   | 0   | 0   | 0  | 0  | 0  | 0   | 0    | 1  |
| 0   | 0   | 0   | 0  | 0  | 0  | 0   | 0    | 3  |
| 0   | 0   | 0   | 0  | 0  | 0  | 0   | 0    | 0  |
| 0   | 0   | 4   | 0  | 0  | 0  | 0   | 0    | 0  |
| 0   | 0   | 0   | 6  | 2  | 0  | 1   | 0    | 0  |
| 0   | 0   | 0   | 0  | 0  | 0  | 0   | 0    | 0  |
| 0   | 0   | 0   | 0  | 0  | 0  | 0   | 0    | 0  |
| 0   | 0   | 0   | 0  | 0  | 0  | 0   | 0    | 0  |
| 0   | 0   | 0   | 0  | 0  | 0  | 0   | 0    | 0  |
| 0   | 0   | 0   | 3  | 0  | 0  | 0   | 0    | 0  |
| 0   | 0   | 0   | 0  | 0  | 2  | 0   | 0    | 0  |
| 0   | 0   | 0   | 0  | 0  | 0  | 0   | 0    | 0  |
| 0   | 0   | 0   | 0  | 0  | 0  | 0   | 0    | 0  |
| 0   | 0   | 0   | 0  | 0  | 0  | 0   | 0    | 0  |
| 0   | 0   | 0   | 1  | 0  | 0  | 8   | 0    | 0  |
| 3   | 0   | 0   | 0  | 2  | 2  | 0   | 10   | 0  |
| 0   | 0   | 0   | 0  | 0  | 0  | 0   | 0    | 0  |
| 0   | 0   | 0   | 0  | 0  | 0  | 0   | 0    | 0  |
| 0   | 0   | 0   | 6  | 0  | 0  | 0   | 0    | 0  |
| 0   | 0   | 0   | 0  | 0  | 0  | 0   | 0    | 0  |
| 0   | 0   | 0   | 0  | 0  | 0  | 0   | 0    | 0  |
| 0   | 0   | 0   | 0  | 0  | 0  | 0   | 0    | 0  |
| 3   | 0   | 0   | 0  | 0  | 0  | 0   | 0    | 0  |
| 4   | 13  | 0   | 22 | 1  | 6  | 0   | 19   | 4  |
| 0   | 0   | 0   | 0  | 0  | 4  | 0   | 0    | 0  |
| 0   | 0   | 0   | 0  | 0  | 0  | 0   | 0    | 0  |
| 0   | 1   | 0   | 1  | 0  | 0  | 1   | 0    | 0  |
| 0   | 0   | 0   | 0  | 0  | 0  | 0   | 0    | 0  |
| 0   | 0   | 0   | 0  | 0  | 0  | 1   | 0    | 0  |
| 1   | 1   | 0   | 0  | 1  | 0  | 0   | 3    | 0  |
| 0   | 0   | 0   | 0  | 0  | 0  | 0   | 0    | 0  |
| 0   | 0   | 0   | 0  | 0  | 0  | 0   | 0    | 0  |
| 0   | 0   | 0   | 0  | 0  | 0  | 0   | 0    | 0  |
| 0   | 0   | 0   | 0  | 0  | 0  | 0   | 0    | 0  |
| 363 | 114 | 167 | 11 | 23 | 16 | 117 | 1401 | 0  |
| 0   | 0   | 0   | 0  | 0  | 0  | 0   | 0    | 0  |
| 0   | 1   | 10  | 0  | 7  | 1  | 1   | 0    | 0  |

|    |   |   |     |   |    |    |    |    |
|----|---|---|-----|---|----|----|----|----|
| 0  | 0 | 0 | 0   | 0 | 0  | 0  | 0  | 0  |
| 0  | 0 | 0 | 0   | 0 | 2  | 0  | 0  | 0  |
| 0  | 0 | 0 | 0   | 0 | 0  | 0  | 0  | 0  |
| 0  | 0 | 0 | 6   | 0 | 0  | 0  | 0  | 0  |
| 0  | 0 | 0 | 0   | 0 | 0  | 0  | 0  | 0  |
| 2  | 0 | 0 | 0   | 0 | 1  | 0  | 0  | 0  |
| 0  | 0 | 0 | 1   | 0 | 0  | 0  | 0  | 0  |
| 0  | 0 | 0 | 0   | 0 | 0  | 0  | 0  | 0  |
| 0  | 0 | 0 | 0   | 0 | 0  | 4  | 0  | 0  |
| 0  | 0 | 1 | 3   | 2 | 0  | 0  | 0  | 0  |
| 0  | 0 | 0 | 0   | 0 | 0  | 0  | 0  | 0  |
| 0  | 0 | 0 | 0   | 0 | 0  | 0  | 0  | 0  |
| 0  | 0 | 0 | 0   | 2 | 6  | 0  | 0  | 0  |
| 0  | 0 | 0 | 0   | 0 | 0  | 1  | 0  | 0  |
| 20 | 0 | 5 | 0   | 0 | 0  | 1  | 0  | 15 |
| 4  | 0 | 1 | 0   | 0 | 1  | 0  | 0  | 8  |
| 0  | 0 | 0 | 0   | 0 | 0  | 0  | 0  | 0  |
| 0  | 0 | 0 | 1   | 0 | 0  | 0  | 0  | 1  |
| 0  | 0 | 0 | 0   | 0 | 0  | 0  | 0  | 1  |
| 0  | 0 | 0 | 0   | 0 | 0  | 0  | 0  | 0  |
| 0  | 2 | 0 | 4   | 2 | 1  | 0  | 6  | 1  |
| 0  | 0 | 0 | 10  | 2 | 0  | 0  | 0  | 0  |
| 1  | 0 | 0 | 0   | 0 | 0  | 0  | 0  | 1  |
| 1  | 0 | 0 | 1   | 0 | 0  | 0  | 2  | 0  |
| 0  | 0 | 0 | 0   | 0 | 0  | 0  | 0  | 0  |
| 0  | 0 | 0 | 3   | 0 | 0  | 2  | 0  | 0  |
| 0  | 0 | 0 | 44  | 0 | 0  | 1  | 28 | 0  |
| 0  | 0 | 0 | 3   | 0 | 0  | 0  | 0  | 0  |
| 0  | 0 | 0 | 0   | 0 | 0  | 0  | 0  | 0  |
| 0  | 0 | 0 | 0   | 0 | 0  | 0  | 0  | 0  |
| 0  | 0 | 0 | 0   | 1 | 5  | 1  | 0  | 0  |
| 0  | 0 | 0 | 0   | 0 | 0  | 0  | 0  | 0  |
| 0  | 0 | 0 | 0   | 0 | 0  | 0  | 0  | 0  |
| 0  | 0 | 0 | 0   | 0 | 0  | 0  | 0  | 0  |
| 0  | 0 | 0 | 0   | 0 | 0  | 0  | 0  | 0  |
| 0  | 0 | 0 | 0   | 0 | 0  | 0  | 0  | 0  |
| 17 | 0 | 2 | 1   | 0 | 2  | 3  | 1  | 17 |
| 0  | 0 | 0 | 0   | 1 | 0  | 0  | 0  | 0  |
| 0  | 0 | 0 | 0   | 0 | 0  | 0  | 0  | 0  |
| 0  | 0 | 0 | 1   | 0 | 0  | 0  | 0  | 0  |
| 2  | 0 | 0 | 122 | 3 | 0  | 0  | 0  | 0  |
| 0  | 0 | 0 | 0   | 0 | 0  | 0  | 0  | 0  |
| 0  | 0 | 0 | 0   | 0 | 0  | 0  | 0  | 0  |
| 0  | 0 | 0 | 0   | 0 | 0  | 0  | 0  | 0  |
| 0  | 0 | 0 | 0   | 0 | 0  | 0  | 0  | 0  |
| 0  | 0 | 0 | 0   | 0 | 0  | 0  | 0  | 0  |
| 0  | 0 | 0 | 0   | 0 | 0  | 0  | 0  | 0  |
| 0  | 0 | 0 | 0   | 0 | 0  | 0  | 0  | 0  |
| 0  | 0 | 0 | 11  | 0 | 0  | 0  | 0  | 0  |
| 0  | 0 | 0 | 0   | 0 | 0  | 0  | 0  | 0  |
| 0  | 0 | 0 | 3   | 0 | 0  | 0  | 0  | 0  |
| 0  | 0 | 0 | 0   | 0 | 0  | 0  | 0  | 0  |
| 0  | 0 | 0 | 712 | 0 | 0  | 0  | 0  | 0  |
| 0  | 0 | 0 | 5   | 0 | 0  | 0  | 0  | 0  |
| 0  | 0 | 0 | 0   | 0 | 0  | 0  | 0  | 0  |
| 0  | 0 | 0 | 19  | 0 | 0  | 13 | 0  | 0  |
| 0  | 0 | 0 | 4   | 9 | 25 | 62 | 0  | 0  |







|   |    |   |   |   |    |   |   |    |
|---|----|---|---|---|----|---|---|----|
| 0 | 0  | 0 | 0 | 0 | 0  | 0 | 0 | 0  |
| 0 | 0  | 0 | 6 | 0 | 0  | 0 | 0 | 0  |
| 0 | 0  | 0 | 0 | 0 | 0  | 0 | 0 | 0  |
| 0 | 0  | 0 | 0 | 0 | 0  | 1 | 0 | 0  |
| 0 | 0  | 0 | 0 | 0 | 0  | 0 | 0 | 0  |
| 0 | 0  | 0 | 0 | 0 | 0  | 0 | 0 | 0  |
| 0 | 0  | 0 | 0 | 0 | 0  | 0 | 0 | 0  |
| 0 | 0  | 0 | 0 | 0 | 0  | 0 | 0 | 0  |
| 0 | 0  | 0 | 0 | 0 | 0  | 0 | 0 | 0  |
| 0 | 8  | 0 | 0 | 1 | 1  | 1 | 0 | 12 |
| 0 | 0  | 0 | 0 | 0 | 0  | 0 | 0 | 0  |
| 0 | 0  | 0 | 0 | 0 | 0  | 0 | 1 | 0  |
| 0 | 0  | 0 | 0 | 3 | 1  | 1 | 0 | 0  |
| 0 | 0  | 0 | 0 | 0 | 0  | 0 | 0 | 0  |
| 0 | 0  | 0 | 0 | 0 | 0  | 0 | 0 | 0  |
| 0 | 0  | 0 | 0 | 0 | 0  | 0 | 0 | 0  |
| 2 | 0  | 0 | 0 | 1 | 0  | 1 | 2 | 0  |
| 0 | 0  | 0 | 0 | 0 | 0  | 0 | 0 | 0  |
| 3 | 0  | 0 | 0 | 0 | 0  | 0 | 0 | 1  |
| 0 | 0  | 0 | 0 | 0 | 0  | 0 | 0 | 0  |
| 0 | 0  | 0 | 0 | 0 | 0  | 0 | 0 | 0  |
| 0 | 0  | 0 | 0 | 2 | 4  | 0 | 0 | 0  |
| 0 | 0  | 0 | 0 | 0 | 0  | 0 | 0 | 0  |
| 0 | 0  | 0 | 0 | 0 | 0  | 0 | 0 | 0  |
| 0 | 0  | 0 | 0 | 0 | 0  | 0 | 0 | 0  |
| 0 | 0  | 0 | 0 | 0 | 0  | 0 | 0 | 0  |
| 0 | 0  | 0 | 0 | 0 | 0  | 0 | 0 | 0  |
| 0 | 2  | 0 | 0 | 0 | 0  | 0 | 0 | 0  |
| 0 | 0  | 0 | 0 | 0 | 0  | 0 | 0 | 0  |
| 0 | 0  | 0 | 1 | 0 | 0  | 1 | 0 | 0  |
| 0 | 0  | 3 | 0 | 0 | 0  | 0 | 0 | 0  |
| 0 | 0  | 0 | 0 | 2 | 1  | 1 | 0 | 0  |
| 0 | 0  | 0 | 0 | 0 | 0  | 0 | 0 | 0  |
| 0 | 0  | 0 | 0 | 0 | 0  | 0 | 0 | 0  |
| 0 | 0  | 0 | 0 | 0 | 1  | 0 | 0 | 0  |
| 0 | 0  | 0 | 0 | 0 | 0  | 0 | 2 | 0  |
| 2 | 0  | 7 | 0 | 0 | 0  | 0 | 0 | 0  |
| 0 | 0  | 0 | 0 | 0 | 0  | 0 | 0 | 0  |
| 0 | 0  | 0 | 0 | 4 | 0  | 0 | 0 | 0  |
| 0 | 0  | 0 | 0 | 0 | 0  | 0 | 0 | 0  |
| 0 | 0  | 0 | 3 | 0 | 0  | 1 | 0 | 0  |
| 0 | 1  | 0 | 0 | 0 | 1  | 0 | 0 | 0  |
| 0 | 0  | 0 | 0 | 0 | 0  | 0 | 0 | 0  |
| 0 | 0  | 0 | 2 | 0 | 0  | 0 | 0 | 0  |
| 0 | 1  | 0 | 0 | 0 | 0  | 0 | 0 | 0  |
| 0 | 0  | 0 | 0 | 7 | 11 | 0 | 0 | 0  |
| 0 | 0  | 0 | 0 | 0 | 0  | 0 | 0 | 0  |
| 0 | 68 | 0 | 0 | 0 | 0  | 0 | 0 | 1  |
| 0 | 0  | 0 | 0 | 0 | 0  | 0 | 0 | 0  |
| 0 | 0  | 0 | 0 | 0 | 0  | 0 | 0 | 0  |
| 0 | 0  | 0 | 0 | 0 | 0  | 0 | 0 | 0  |
| 0 | 0  | 1 | 0 | 0 | 0  | 2 | 7 | 0  |
| 0 | 0  | 0 | 3 | 4 | 0  | 1 | 0 | 0  |





|   |     |    |    |    |    |     |   |   |
|---|-----|----|----|----|----|-----|---|---|
| 0 | 0   | 0  | 0  | 0  | 0  | 0   | 0 | 0 |
| 0 | 1   | 0  | 0  | 0  | 0  | 0   | 0 | 0 |
| 0 | 0   | 0  | 0  | 0  | 0  | 0   | 0 | 0 |
| 0 | 0   | 0  | 0  | 0  | 0  | 0   | 0 | 0 |
| 0 | 0   | 0  | 0  | 0  | 0  | 0   | 0 | 0 |
| 0 | 0   | 0  | 0  | 0  | 0  | 0   | 0 | 0 |
| 0 | 0   | 47 | 0  | 0  | 0  | 0   | 0 | 0 |
| 0 | 0   | 0  | 7  | 0  | 0  | 0   | 0 | 0 |
| 0 | 0   | 0  | 0  | 0  | 0  | 0   | 0 | 0 |
| 0 | 0   | 0  | 0  | 1  | 4  | 0   | 0 | 0 |
| 1 | 3   | 0  | 1  | 0  | 0  | 0   | 5 | 2 |
| 0 | 0   | 8  | 0  | 0  | 0  | 0   | 0 | 0 |
| 0 | 0   | 0  | 0  | 0  | 0  | 0   | 0 | 0 |
| 0 | 0   | 0  | 1  | 0  | 0  | 0   | 0 | 0 |
| 0 | 0   | 0  | 0  | 0  | 0  | 0   | 0 | 0 |
| 0 | 0   | 0  | 0  | 4  | 7  | 0   | 0 | 0 |
| 3 | 0   | 1  | 0  | 0  | 0  | 1   | 0 | 5 |
| 0 | 0   | 0  | 0  | 0  | 0  | 0   | 0 | 2 |
| 0 | 0   | 0  | 0  | 0  | 0  | 0   | 0 | 0 |
| 0 | 0   | 0  | 3  | 0  | 0  | 0   | 0 | 0 |
| 0 | 0   | 0  | 0  | 0  | 0  | 0   | 0 | 0 |
| 1 | 0   | 0  | 0  | 0  | 0  | 0   | 0 | 1 |
| 0 | 0   | 0  | 0  | 0  | 0  | 0   | 0 | 0 |
| 5 | 0   | 0  | 0  | 0  | 0  | 0   | 0 | 0 |
| 0 | 0   | 0  | 0  | 0  | 0  | 0   | 0 | 0 |
| 9 | 0   | 0  | 0  | 0  | 0  | 2   | 0 | 8 |
| 0 | 0   | 0  | 0  | 0  | 0  | 0   | 0 | 0 |
| 0 | 0   | 0  | 0  | 0  | 1  | 0   | 1 | 0 |
| 0 | 2   | 10 | 0  | 5  | 9  | 0   | 0 | 0 |
| 0 | 0   | 0  | 0  | 0  | 0  | 0   | 0 | 0 |
| 0 | 0   | 0  | 0  | 0  | 0  | 0   | 0 | 0 |
| 0 | 0   | 0  | 0  | 1  | 0  | 0   | 0 | 0 |
| 0 | 0   | 4  | 0  | 0  | 0  | 0   | 0 | 0 |
| 0 | 0   | 0  | 0  | 0  | 0  | 0   | 0 | 0 |
| 0 | 0   | 0  | 0  | 0  | 0  | 0   | 0 | 0 |
| 0 | 0   | 0  | 0  | 0  | 0  | 0   | 0 | 0 |
| 0 | 0   | 0  | 0  | 0  | 0  | 0   | 0 | 0 |
| 0 | 0   | 0  | 0  | 0  | 0  | 0   | 0 | 0 |
| 0 | 0   | 0  | 0  | 0  | 0  | 0   | 0 | 0 |
| 4 | 0   | 0  | 0  | 0  | 0  | 0   | 0 | 0 |
| 0 | 0   | 0  | 0  | 0  | 0  | 0   | 0 | 0 |
| 0 | 0   | 0  | 0  | 0  | 0  | 0   | 0 | 0 |
| 0 | 0   | 0  | 19 | 1  | 0  | 0   | 0 | 0 |
| 0 | 0   | 0  | 1  | 0  | 0  | 0   | 0 | 0 |
| 1 | 2   | 0  | 6  | 0  | 1  | 0   | 5 | 1 |
| 0 | 0   | 0  | 0  | 0  | 0  | 0   | 0 | 0 |
| 0 | 10  | 0  | 3  | 2  | 0  | 7   | 0 | 0 |
| 0 | 1   | 0  | 0  | 0  | 0  | 1   | 0 | 0 |
| 0 | 110 | 0  | 48 | 45 | 56 | 162 | 0 | 0 |
| 0 | 0   | 0  | 0  | 0  | 0  | 0   | 0 | 0 |
| 0 | 0   | 0  | 0  | 0  | 0  | 0   | 0 | 0 |
| 0 | 0   | 0  | 0  | 0  | 0  | 0   | 0 | 0 |
| 1 | 2   | 0  | 0  | 1  | 0  | 0   | 1 | 0 |
| 0 | 0   | 0  | 0  | 0  | 0  | 0   | 0 | 0 |
| 0 | 0   | 0  | 0  | 0  | 0  | 0   | 0 | 0 |
| 0 | 0   | 0  | 1  | 0  | 0  | 0   | 0 | 0 |
| 0 | 0   | 0  | 0  | 0  | 0  | 0   | 0 | 0 |
| 0 | 0   | 1  | 0  | 0  | 0  | 0   | 0 | 0 |





|   |    |     |     |     |     |    |   |    |
|---|----|-----|-----|-----|-----|----|---|----|
| 1 | 0  | 0   | 4   | 0   | 0   | 0  | 0 | 0  |
| 0 | 0  | 3   | 0   | 0   | 0   | 0  | 0 | 0  |
| 0 | 0  | 0   | 0   | 0   | 0   | 0  | 0 | 10 |
| 0 | 0  | 0   | 0   | 1   | 0   | 0  | 0 | 0  |
| 0 | 0  | 0   | 0   | 0   | 0   | 0  | 0 | 0  |
| 0 | 0  | 0   | 2   | 2   | 9   | 0  | 0 | 0  |
| 0 | 0  | 0   | 0   | 0   | 0   | 0  | 0 | 0  |
| 0 | 15 | 0   | 3   | 4   | 0   | 5  | 0 | 0  |
| 0 | 0  | 0   | 0   | 0   | 0   | 0  | 0 | 0  |
| 0 | 0  | 0   | 0   | 0   | 0   | 0  | 0 | 0  |
| 0 | 5  | 0   | 1   | 1   | 0   | 0  | 0 | 3  |
| 1 | 0  | 0   | 0   | 0   | 0   | 0  | 0 | 0  |
| 0 | 0  | 0   | 0   | 0   | 2   | 0  | 0 | 0  |
| 0 | 0  | 0   | 5   | 0   | 0   | 0  | 0 | 0  |
| 0 | 0  | 0   | 0   | 0   | 0   | 0  | 0 | 0  |
| 0 | 0  | 0   | 0   | 0   | 0   | 0  | 0 | 0  |
| 0 | 0  | 0   | 0   | 0   | 177 | 0  | 0 | 0  |
| 0 | 0  | 0   | 0   | 0   | 0   | 0  | 0 | 0  |
| 0 | 0  | 0   | 0   | 0   | 0   | 0  | 0 | 0  |
| 0 | 2  | 0   | 0   | 1   | 0   | 2  | 0 | 0  |
| 0 | 0  | 0   | 0   | 0   | 0   | 3  | 0 | 0  |
| 0 | 0  | 0   | 0   | 0   | 0   | 0  | 0 | 0  |
| 6 | 0  | 1   | 0   | 1   | 0   | 2  | 1 | 8  |
| 0 | 0  | 632 | 0   | 1   | 0   | 0  | 2 | 0  |
| 0 | 0  | 0   | 0   | 0   | 0   | 0  | 0 | 0  |
| 1 | 0  | 0   | 0   | 86  | 0   | 0  | 0 | 0  |
| 0 | 0  | 0   | 0   | 0   | 0   | 0  | 0 | 0  |
| 0 | 0  | 1   | 0   | 0   | 0   | 0  | 0 | 0  |
| 0 | 0  | 0   | 0   | 0   | 0   | 0  | 0 | 0  |
| 0 | 0  | 0   | 0   | 0   | 0   | 0  | 0 | 0  |
| 0 | 0  | 0   | 0   | 0   | 0   | 0  | 0 | 0  |
| 0 | 0  | 0   | 0   | 0   | 0   | 0  | 0 | 0  |
| 0 | 0  | 0   | 0   | 1   | 0   | 0  | 0 | 0  |
| 2 | 0  | 0   | 0   | 0   | 0   | 0  | 0 | 3  |
| 0 | 0  | 0   | 0   | 0   | 0   | 0  | 0 | 0  |
| 0 | 0  | 0   | 0   | 0   | 0   | 0  | 0 | 0  |
| 0 | 0  | 0   | 0   | 0   | 0   | 0  | 0 | 0  |
| 0 | 0  | 0   | 0   | 0   | 0   | 0  | 0 | 0  |
| 0 | 0  | 0   | 0   | 0   | 0   | 0  | 0 | 0  |
| 0 | 0  | 0   | 29  | 15  | 0   | 0  | 0 | 0  |
| 0 | 0  | 0   | 6   | 0   | 0   | 0  | 0 | 0  |
| 0 | 0  | 0   | 0   | 0   | 0   | 0  | 0 | 0  |
| 0 | 1  | 2   | 0   | 4   | 2   | 1  | 0 | 0  |
| 1 | 0  | 0   | 0   | 0   | 0   | 0  | 0 | 0  |
| 0 | 0  | 0   | 0   | 0   | 0   | 0  | 0 | 0  |
| 0 | 0  | 0   | 0   | 37  | 0   | 0  | 0 | 0  |
| 0 | 0  | 0   | 0   | 0   | 96  | 0  | 0 | 0  |
| 0 | 0  | 0   | 0   | 0   | 0   | 0  | 0 | 0  |
| 0 | 0  | 0   | 0   | 0   | 0   | 0  | 0 | 0  |
| 0 | 0  | 0   | 0   | 0   | 0   | 0  | 0 | 0  |
| 0 | 0  | 0   | 0   | 0   | 0   | 0  | 0 | 0  |
| 0 | 0  | 0   | 0   | 0   | 0   | 0  | 0 | 0  |
| 0 | 0  | 0   | 0   | 0   | 0   | 0  | 0 | 0  |
| 0 | 0  | 0   | 0   | 0   | 0   | 0  | 0 | 0  |
| 0 | 0  | 0   | 0   | 0   | 0   | 0  | 0 | 0  |
| 4 | 0  | 0   | 2   | 0   | 0   | 0  | 0 | 14 |
| 0 | 0  | 0   | 0   | 0   | 0   | 0  | 0 | 0  |
| 0 | 0  | 0   | 0   | 0   | 0   | 0  | 0 | 0  |
| 0 | 4  | 0   | 8   | 230 | 0   | 50 | 0 | 0  |
| 0 | 0  | 0   | 492 | 0   | 0   | 0  | 0 | 0  |



|   |    |   |    |   |   |   |   |   |
|---|----|---|----|---|---|---|---|---|
| 0 | 0  | 0 | 0  | 0 | 0 | 0 | 0 | 0 |
| 0 | 0  | 0 | 0  | 0 | 0 | 0 | 0 | 1 |
| 0 | 0  | 0 | 0  | 0 | 0 | 0 | 0 | 0 |
| 0 | 0  | 0 | 0  | 0 | 0 | 0 | 0 | 0 |
| 0 | 0  | 0 | 0  | 0 | 0 | 0 | 0 | 0 |
| 0 | 0  | 0 | 0  | 0 | 0 | 0 | 0 | 0 |
| 0 | 0  | 0 | 0  | 0 | 0 | 0 | 0 | 0 |
| 0 | 0  | 0 | 0  | 0 | 0 | 0 | 0 | 0 |
| 0 | 46 | 0 | 0  | 0 | 0 | 0 | 0 | 0 |
| 1 | 0  | 1 | 0  | 0 | 0 | 0 | 0 | 0 |
| 0 | 0  | 0 | 0  | 0 | 0 | 0 | 0 | 0 |
| 0 | 0  | 0 | 0  | 0 | 0 | 0 | 0 | 0 |
| 1 | 0  | 0 | 0  | 0 | 0 | 0 | 0 | 1 |
| 0 | 0  | 0 | 0  | 0 | 0 | 0 | 0 | 0 |
| 0 | 0  | 0 | 0  | 0 | 0 | 0 | 0 | 0 |
| 1 | 2  | 0 | 0  | 0 | 0 | 0 | 0 | 0 |
| 0 | 0  | 0 | 0  | 0 | 0 | 0 | 0 | 0 |
| 0 | 0  | 0 | 0  | 1 | 0 | 0 | 0 | 0 |
| 0 | 1  | 0 | 0  | 0 | 0 | 0 | 0 | 0 |
| 0 | 0  | 0 | 0  | 1 | 0 | 0 | 0 | 0 |
| 0 | 0  | 0 | 5  | 0 | 0 | 0 | 0 | 0 |
| 0 | 0  | 0 | 0  | 0 | 0 | 0 | 0 | 0 |
| 0 | 0  | 0 | 0  | 0 | 2 | 0 | 0 | 0 |
| 0 | 0  | 0 | 0  | 0 | 0 | 0 | 0 | 0 |
| 0 | 0  | 0 | 0  | 0 | 0 | 0 | 0 | 0 |
| 0 | 0  | 0 | 0  | 0 | 0 | 0 | 0 | 0 |
| 0 | 0  | 0 | 0  | 1 | 2 | 0 | 0 | 0 |
| 0 | 0  | 0 | 0  | 0 | 0 | 0 | 0 | 0 |
| 0 | 0  | 0 | 0  | 0 | 0 | 0 | 0 | 0 |
| 0 | 0  | 0 | 3  | 0 | 0 | 0 | 2 | 0 |
| 0 | 0  | 0 | 0  | 0 | 0 | 0 | 0 | 0 |
| 0 | 0  | 0 | 0  | 2 | 0 | 0 | 0 | 0 |
| 0 | 0  | 0 | 17 | 3 | 0 | 0 | 0 | 0 |
| 0 | 0  | 0 | 0  | 0 | 0 | 0 | 0 | 0 |
| 0 | 0  | 0 | 0  | 0 | 0 | 0 | 0 | 0 |
| 8 | 0  | 0 | 0  | 0 | 0 | 1 | 0 | 3 |
| 0 | 0  | 0 | 0  | 0 | 0 | 0 | 0 | 0 |
| 0 | 0  | 0 | 0  | 0 | 0 | 0 | 0 | 0 |
| 0 | 0  | 0 | 0  | 0 | 0 | 0 | 0 | 0 |
| 0 | 0  | 0 | 0  | 0 | 0 | 0 | 0 | 0 |
| 0 | 0  | 0 | 0  | 0 | 0 | 0 | 0 | 0 |
| 0 | 0  | 3 | 0  | 0 | 0 | 0 | 0 | 0 |
| 0 | 0  | 0 | 0  | 0 | 0 | 0 | 0 | 0 |
| 0 | 0  | 0 | 0  | 0 | 0 | 0 | 0 | 0 |
| 0 | 0  | 0 | 0  | 0 | 0 | 0 | 0 | 0 |
| 0 | 0  | 0 | 0  | 0 | 0 | 0 | 0 | 0 |
| 0 | 0  | 0 | 0  | 0 | 0 | 0 | 0 | 0 |
| 0 | 0  | 0 | 0  | 0 | 0 | 0 | 0 | 0 |
| 9 | 0  | 0 | 0  | 0 | 0 | 0 | 0 | 0 |
| 0 | 0  | 0 | 0  | 0 | 0 | 0 | 0 | 0 |
| 0 | 0  | 0 | 0  | 0 | 0 | 0 | 0 | 0 |
| 0 | 0  | 0 | 1  | 1 | 0 | 0 | 0 | 0 |
| 0 | 0  | 0 | 0  | 0 | 0 | 0 | 0 | 0 |
| 2 | 0  | 0 | 0  | 0 | 0 | 0 | 0 | 3 |

|     |      |     |     |     |     |    |   |    |
|-----|------|-----|-----|-----|-----|----|---|----|
| 0   | 0    | 0   | 0   | 0   | 5   | 0  | 0 | 0  |
| 0   | 0    | 0   | 0   | 0   | 0   | 0  | 0 | 0  |
| 0   | 0    | 0   | 0   | 0   | 0   | 0  | 0 | 0  |
| 0   | 0    | 0   | 0   | 0   | 0   | 0  | 0 | 0  |
| 0   | 0    | 0   | 0   | 0   | 0   | 0  | 0 | 0  |
| 0   | 8    | 0   | 0   | 0   | 0   | 0  | 0 | 1  |
| 0   | 0    | 0   | 0   | 2   | 335 | 0  | 0 | 0  |
| 0   | 0    | 0   | 0   | 0   | 0   | 1  | 0 | 0  |
| 0   | 0    | 0   | 0   | 0   | 0   | 0  | 0 | 0  |
| 0   | 0    | 0   | 0   | 0   | 0   | 0  | 0 | 0  |
| 0   | 0    | 0   | 0   | 0   | 0   | 0  | 0 | 0  |
| 19  | 1603 | 176 | 100 | 121 | 8   | 3  | 1 | 1  |
| 0   | 0    | 0   | 18  | 1   | 0   | 11 | 0 | 0  |
| 2   | 0    | 0   | 0   | 0   | 0   | 0  | 0 | 0  |
| 0   | 0    | 0   | 0   | 0   | 0   | 0  | 0 | 0  |
| 6   | 0    | 0   | 0   | 0   | 1   | 2  | 0 | 3  |
| 0   | 0    | 0   | 0   | 0   | 0   | 0  | 0 | 0  |
| 0   | 0    | 0   | 0   | 0   | 0   | 0  | 0 | 0  |
| 0   | 0    | 0   | 0   | 0   | 0   | 0  | 0 | 0  |
| 9   | 0    | 1   | 0   | 0   | 2   | 3  | 0 | 8  |
| 0   | 0    | 0   | 4   | 0   | 0   | 0  | 0 | 0  |
| 0   | 0    | 0   | 0   | 0   | 0   | 0  | 0 | 0  |
| 1   | 5    | 0   | 0   | 0   | 0   | 0  | 0 | 0  |
| 0   | 0    | 0   | 0   | 12  | 28  | 2  | 0 | 0  |
| 0   | 0    | 0   | 0   | 0   | 7   | 0  | 0 | 0  |
| 0   | 0    | 0   | 0   | 2   | 4   | 0  | 0 | 0  |
| 0   | 0    | 0   | 0   | 6   | 0   | 0  | 0 | 0  |
| 0   | 0    | 0   | 0   | 0   | 0   | 0  | 0 | 0  |
| 0   | 0    | 0   | 0   | 0   | 0   | 0  | 0 | 0  |
| 0   | 0    | 0   | 0   | 0   | 0   | 0  | 0 | 0  |
| 0   | 0    | 0   | 0   | 0   | 0   | 0  | 0 | 0  |
| 0   | 0    | 0   | 0   | 0   | 0   | 0  | 0 | 0  |
| 104 | 1    | 84  | 3   | 1   | 7   | 3  | 8 | 42 |
| 0   | 2    | 16  | 0   | 10  | 12  | 0  | 0 | 0  |
| 0   | 0    | 0   | 1   | 0   | 0   | 0  | 0 | 11 |
| 0   | 0    | 2   | 0   | 0   | 0   | 0  | 0 | 0  |
| 0   | 0    | 0   | 0   | 0   | 0   | 0  | 0 | 0  |
| 0   | 0    | 1   | 0   | 0   | 0   | 0  | 0 | 0  |
| 0   | 0    | 0   | 0   | 0   | 0   | 0  | 0 | 0  |
| 0   | 0    | 0   | 0   | 0   | 0   | 0  | 0 | 0  |
| 0   | 0    | 0   | 0   | 0   | 0   | 0  | 0 | 0  |
| 0   | 0    | 0   | 0   | 0   | 0   | 0  | 0 | 0  |
| 1   | 0    | 1   | 0   | 0   | 0   | 0  | 0 | 0  |
| 0   | 0    | 0   | 0   | 3   | 2   | 0  | 0 | 0  |
| 0   | 0    | 0   | 0   | 0   | 0   | 0  | 0 | 0  |
| 0   | 0    | 0   | 0   | 0   | 0   | 0  | 0 | 0  |
| 0   | 0    | 0   | 0   | 0   | 0   | 0  | 0 | 0  |
| 1   | 0    | 0   | 0   | 0   | 0   | 0  | 0 | 0  |
| 0   | 0    | 2   | 0   | 0   | 0   | 0  | 0 | 0  |
| 0   | 0    | 5   | 0   | 0   | 0   | 0  | 0 | 0  |
| 0   | 0    | 0   | 0   | 0   | 0   | 0  | 0 | 0  |
| 0   | 0    | 0   | 0   | 0   | 0   | 1  | 0 | 0  |
| 29  | 0    | 3   | 0   | 0   | 1   | 4  | 0 | 5  |
| 0   | 0    | 0   | 0   | 0   | 0   | 0  | 0 | 0  |
| 0   | 0    | 0   | 0   | 2   | 0   | 0  | 0 | 0  |
| 0   | 0    | 0   | 0   | 0   | 1   | 0  | 0 | 0  |
| 0   | 0    | 0   | 0   | 513 | 0   | 0  | 0 | 0  |
| 0   | 0    | 0   | 0   | 0   | 0   | 1  | 0 | 1  |





|    |    |   |     |     |    |   |   |    |
|----|----|---|-----|-----|----|---|---|----|
| 0  | 0  | 0 | 0   | 0   | 0  | 0 | 0 | 0  |
| 0  | 0  | 0 | 0   | 0   | 0  | 0 | 0 | 0  |
| 0  | 0  | 4 | 0   | 0   | 0  | 0 | 0 | 0  |
| 0  | 0  | 0 | 0   | 2   | 0  | 0 | 0 | 0  |
| 1  | 1  | 0 | 3   | 0   | 0  | 0 | 3 | 0  |
| 3  | 4  | 0 | 3   | 0   | 3  | 0 | 5 | 0  |
| 0  | 0  | 0 | 0   | 386 | 0  | 0 | 0 | 0  |
| 0  | 0  | 0 | 0   | 0   | 0  | 0 | 0 | 0  |
| 0  | 0  | 0 | 0   | 0   | 0  | 0 | 0 | 0  |
| 5  | 0  | 0 | 0   | 0   | 1  | 2 | 0 | 4  |
| 0  | 0  | 0 | 0   | 0   | 0  | 0 | 0 | 0  |
| 0  | 0  | 0 | 0   | 0   | 2  | 0 | 2 | 0  |
| 0  | 0  | 0 | 0   | 1   | 0  | 0 | 0 | 0  |
| 0  | 0  | 0 | 0   | 0   | 0  | 0 | 0 | 0  |
| 0  | 0  | 0 | 588 | 0   | 0  | 0 | 0 | 0  |
| 0  | 0  | 0 | 0   | 0   | 0  | 0 | 0 | 0  |
| 0  | 0  | 0 | 1   | 0   | 0  | 0 | 0 | 0  |
| 0  | 0  | 0 | 0   | 0   | 0  | 0 | 0 | 0  |
| 0  | 0  | 0 | 0   | 0   | 0  | 0 | 0 | 0  |
| 0  | 0  | 0 | 0   | 0   | 0  | 0 | 0 | 0  |
| 0  | 0  | 0 | 0   | 0   | 0  | 0 | 0 | 0  |
| 0  | 0  | 0 | 0   | 0   | 4  | 0 | 0 | 0  |
| 0  | 0  | 0 | 1   | 0   | 0  | 0 | 0 | 0  |
| 0  | 0  | 0 | 0   | 0   | 0  | 0 | 0 | 0  |
| 0  | 1  | 0 | 0   | 0   | 0  | 1 | 0 | 0  |
| 0  | 0  | 0 | 0   | 0   | 0  | 0 | 0 | 0  |
| 0  | 0  | 0 | 2   | 0   | 0  | 0 | 0 | 0  |
| 0  | 1  | 0 | 0   | 0   | 0  | 0 | 0 | 0  |
| 0  | 0  | 0 | 0   | 0   | 0  | 0 | 0 | 0  |
| 0  | 0  | 0 | 0   | 0   | 0  | 0 | 0 | 0  |
| 0  | 0  | 0 | 0   | 0   | 4  | 0 | 0 | 0  |
| 0  | 0  | 0 | 0   | 0   | 0  | 0 | 0 | 0  |
| 0  | 0  | 0 | 0   | 0   | 0  | 0 | 0 | 0  |
| 0  | 0  | 0 | 0   | 0   | 0  | 0 | 0 | 0  |
| 0  | 0  | 0 | 0   | 0   | 71 | 0 | 0 | 0  |
| 0  | 0  | 0 | 1   | 0   | 0  | 0 | 0 | 0  |
| 0  | 0  | 0 | 0   | 0   | 0  | 0 | 0 | 0  |
| 0  | 0  | 0 | 0   | 0   | 1  | 0 | 0 | 0  |
| 0  | 0  | 0 | 0   | 0   | 1  | 0 | 0 | 0  |
| 0  | 0  | 0 | 0   | 14  | 17 | 8 | 0 | 0  |
| 0  | 0  | 0 | 0   | 0   | 0  | 0 | 0 | 0  |
| 0  | 0  | 0 | 37  | 0   | 0  | 0 | 0 | 0  |
| 0  | 0  | 0 | 0   | 5   | 0  | 0 | 0 | 0  |
| 0  | 0  | 0 | 0   | 0   | 0  | 0 | 0 | 0  |
| 0  | 0  | 0 | 0   | 0   | 0  | 0 | 0 | 0  |
| 0  | 0  | 0 | 0   | 0   | 0  | 1 | 0 | 0  |
| 2  | 0  | 0 | 0   | 0   | 0  | 0 | 0 | 0  |
| 0  | 0  | 0 | 0   | 0   | 0  | 0 | 0 | 0  |
| 0  | 0  | 0 | 0   | 0   | 0  | 1 | 0 | 0  |
| 22 | 0  | 3 | 0   | 0   | 5  | 7 | 1 | 26 |
| 0  | 0  | 0 | 0   | 0   | 0  | 0 | 0 | 0  |
| 0  | 3  | 0 | 0   | 0   | 0  | 0 | 0 | 0  |
| 0  | 0  | 0 | 0   | 0   | 0  | 0 | 0 | 0  |
| 0  | 0  | 0 | 0   | 2   | 0  | 0 | 0 | 0  |
| 0  | 0  | 0 | 0   | 0   | 0  | 0 | 0 | 0  |
| 0  | 0  | 0 | 1   | 0   | 0  | 0 | 0 | 3  |
| 0  | 1  | 0 | 0   | 0   | 0  | 0 | 0 | 0  |
| 0  | 0  | 0 | 0   | 0   | 0  | 0 | 0 | 0  |
| 0  | 0  | 0 | 0   | 0   | 0  | 0 | 0 | 0  |
| 0  | 22 | 0 | 10  | 131 | 0  | 2 | 0 | 0  |



|     |     |    |      |     |     |     |      |     |
|-----|-----|----|------|-----|-----|-----|------|-----|
| 0   | 1   | 0  | 0    | 0   | 0   | 0   | 0    | 0   |
| 0   | 11  | 0  | 3    | 3   | 0   | 8   | 0    | 0   |
| 0   | 0   | 0  | 0    | 1   | 1   | 2   | 0    | 0   |
| 1   | 0   | 2  | 0    | 0   | 0   | 0   | 0    | 0   |
| 0   | 0   | 0  | 0    | 0   | 0   | 0   | 0    | 0   |
| 0   | 0   | 0  | 0    | 0   | 0   | 0   | 0    | 0   |
| 0   | 0   | 0  | 0    | 0   | 0   | 0   | 0    | 0   |
| 0   | 0   | 0  | 0    | 0   | 0   | 0   | 0    | 0   |
| 0   | 0   | 0  | 0    | 0   | 1   | 0   | 0    | 0   |
| 0   | 0   | 0  | 0    | 0   | 0   | 0   | 0    | 0   |
| 0   | 0   | 0  | 0    | 0   | 0   | 0   | 0    | 0   |
| 0   | 0   | 0  | 0    | 0   | 0   | 0   | 0    | 0   |
| 0   | 0   | 0  | 0    | 0   | 0   | 0   | 0    | 0   |
| 0   | 0   | 0  | 0    | 0   | 0   | 0   | 0    | 0   |
| 0   | 0   | 0  | 0    | 0   | 0   | 0   | 0    | 0   |
| 0   | 0   | 0  | 0    | 0   | 0   | 0   | 0    | 0   |
| 0   | 0   | 0  | 0    | 0   | 0   | 0   | 0    | 1   |
| 0   | 0   | 0  | 0    | 1   | 2   | 1   | 0    | 0   |
| 0   | 0   | 0  | 1    | 1   | 0   | 0   | 0    | 0   |
| 0   | 0   | 0  | 0    | 0   | 0   | 0   | 0    | 0   |
| 118 | 1   | 13 | 4    | 2   | 23  | 28  | 14   | 94  |
| 0   | 0   | 1  | 0    | 0   | 0   | 0   | 0    | 1   |
| 0   | 0   | 0  | 0    | 0   | 0   | 0   | 0    | 0   |
| 0   | 0   | 2  | 0    | 0   | 0   | 0   | 0    | 0   |
| 0   | 0   | 0  | 0    | 0   | 0   | 0   | 0    | 0   |
| 0   | 0   | 0  | 52   | 0   | 0   | 0   | 0    | 0   |
| 0   | 0   | 0  | 0    | 0   | 0   | 0   | 0    | 0   |
| 0   | 0   | 0  | 0    | 0   | 0   | 0   | 0    | 0   |
| 0   | 0   | 0  | 0    | 0   | 0   | 0   | 0    | 0   |
| 0   | 0   | 0  | 0    | 0   | 0   | 0   | 0    | 0   |
| 0   | 0   | 0  | 0    | 0   | 0   | 0   | 0    | 0   |
| 1   | 0   | 16 | 0    | 0   | 0   | 0   | 0    | 0   |
| 0   | 0   | 0  | 0    | 3   | 3   | 0   | 0    | 0   |
| 3   | 0   | 1  | 0    | 1   | 1   | 2   | 0    | 3   |
| 0   | 0   | 0  | 0    | 0   | 0   | 0   | 0    | 0   |
| 0   | 0   | 0  | 0    | 0   | 0   | 0   | 0    | 0   |
| 0   | 0   | 0  | 0    | 0   | 0   | 0   | 0    | 0   |
| 0   | 0   | 0  | 0    | 0   | 0   | 0   | 0    | 0   |
| 0   | 0   | 0  | 0    | 0   | 0   | 0   | 0    | 0   |
| 451 | 962 | 0  | 1151 | 161 | 677 | 121 | 2029 | 502 |
| 0   | 0   | 0  | 0    | 0   | 0   | 0   | 0    | 0   |
| 0   | 0   | 0  | 0    | 0   | 0   | 0   | 0    | 0   |
| 0   | 0   | 0  | 0    | 0   | 0   | 0   | 0    | 0   |
| 0   | 0   | 0  | 0    | 0   | 0   | 0   | 0    | 0   |
| 0   | 0   | 0  | 0    | 0   | 0   | 0   | 0    | 0   |
| 0   | 0   | 1  | 0    | 0   | 0   | 0   | 0    | 0   |
| 0   | 0   | 0  | 0    | 1   | 0   | 0   | 0    | 0   |
| 0   | 0   | 0  | 0    | 0   | 0   | 0   | 0    | 0   |
| 0   | 0   | 0  | 0    | 0   | 0   | 0   | 0    | 0   |
| 0   | 0   | 0  | 0    | 0   | 0   | 0   | 0    | 0   |
| 0   | 0   | 0  | 0    | 0   | 0   | 0   | 0    | 0   |
| 0   | 0   | 0  | 0    | 4   | 0   | 0   | 0    | 0   |
| 0   | 0   | 0  | 238  | 0   | 0   | 0   | 0    | 0   |
| 0   | 2   | 0  | 0    | 1   | 0   | 2   | 0    | 1   |
| 0   | 1   | 0  | 0    | 0   | 0   | 0   | 0    | 0   |
| 0   | 0   | 0  | 0    | 0   | 0   | 0   | 0    | 0   |
| 0   | 0   | 0  | 0    | 0   | 2   | 1   | 1    | 0   |
| 0   | 0   | 0  | 2    | 9   | 114 | 0   | 0    | 0   |
| 0   | 0   | 0  | 0    | 0   | 0   | 0   | 0    | 0   |
| 0   | 0   | 0  | 7    | 0   | 0   | 0   | 0    | 0   |

































|   |   |   |   |   |   |   |   |   |
|---|---|---|---|---|---|---|---|---|
| 0 | 0 | 0 | 0 | 0 | 0 | 0 | 0 | 0 |
| 0 | 0 | 0 | 0 | 0 | 0 | 0 | 0 | 0 |
| 0 | 0 | 0 | 0 | 0 | 0 | 0 | 0 | 0 |
| 0 | 0 | 0 | 0 | 0 | 0 | 0 | 0 | 0 |
| 0 | 0 | 0 | 0 | 2 | 0 | 0 | 0 | 0 |
| 0 | 0 | 0 | 0 | 1 | 1 | 0 | 0 | 0 |
| 0 | 0 | 0 | 0 | 0 | 0 | 0 | 3 | 0 |
| 0 | 0 | 0 | 0 | 0 | 0 | 0 | 0 | 0 |
| 0 | 0 | 0 | 0 | 0 | 0 | 0 | 0 | 0 |
| 0 | 0 | 0 | 0 | 0 | 0 | 0 | 0 | 0 |
| 0 | 0 | 0 | 0 | 0 | 0 | 0 | 0 | 0 |
| 0 | 0 | 0 | 0 | 0 | 0 | 0 | 0 | 0 |
| 0 | 0 | 0 | 0 | 0 | 0 | 0 | 0 | 0 |
| 0 | 0 | 0 | 0 | 0 | 0 | 0 | 0 | 0 |
| 0 | 0 | 0 | 0 | 0 | 0 | 0 | 0 | 0 |
| 0 | 0 | 1 | 0 | 0 | 0 | 0 | 0 | 0 |
| 0 | 0 | 0 | 0 | 0 | 0 | 0 | 0 | 0 |
| 0 | 0 | 0 | 0 | 0 | 0 | 0 | 0 | 0 |
| 0 | 0 | 0 | 0 | 0 | 1 | 0 | 0 | 0 |
| 0 | 0 | 0 | 0 | 0 | 0 | 0 | 0 | 0 |
| 0 | 0 | 0 | 0 | 0 | 0 | 0 | 0 | 0 |
| 0 | 0 | 0 | 0 | 0 | 0 | 0 | 0 | 0 |
| 0 | 0 | 0 | 0 | 0 | 0 | 0 | 0 | 0 |
| 0 | 0 | 0 | 0 | 0 | 0 | 0 | 0 | 0 |
| 0 | 0 | 0 | 0 | 0 | 0 | 0 | 0 | 0 |
| 0 | 0 | 0 | 0 | 0 | 0 | 0 | 0 | 0 |
| 6 | 0 | 1 | 0 | 0 | 1 | 2 | 0 | 1 |
| 2 | 0 | 0 | 0 | 0 | 0 | 0 | 0 | 0 |
| 0 | 0 | 0 | 0 | 0 | 0 | 0 | 0 | 0 |
| 0 | 0 | 0 | 0 | 0 | 0 | 0 | 0 | 0 |
| 0 | 0 | 0 | 0 | 0 | 0 | 0 | 0 | 0 |
| 0 | 0 | 0 | 0 | 0 | 0 | 0 | 0 | 0 |
| 0 | 0 | 0 | 0 | 0 | 0 | 0 | 0 | 0 |
| 0 | 0 | 0 | 0 | 0 | 0 | 0 | 0 | 0 |
| 0 | 0 | 0 | 0 | 0 | 0 | 0 | 0 | 0 |
| 0 | 0 | 0 | 0 | 0 | 0 | 0 | 0 | 0 |
| 0 | 0 | 0 | 0 | 0 | 0 | 0 | 0 | 0 |
| 0 | 0 | 0 | 0 | 0 | 0 | 0 | 0 | 0 |
| 0 | 0 | 0 | 0 | 0 | 2 | 0 | 6 | 0 |
| 0 | 0 | 0 | 0 | 0 | 0 | 0 | 0 | 0 |
| 0 | 0 | 0 | 0 | 0 | 0 | 0 | 0 | 0 |
| 0 | 0 | 0 | 0 | 0 | 0 | 0 | 0 | 0 |
| 0 | 0 | 0 | 0 | 0 | 0 | 0 | 0 | 0 |
| 0 | 0 | 0 | 0 | 0 | 0 | 0 | 0 | 0 |
| 0 | 0 | 0 | 0 | 0 | 0 | 0 | 0 | 0 |
| 0 | 0 | 0 | 0 | 0 | 0 | 0 | 0 | 0 |
| 0 | 0 | 0 | 0 | 0 | 0 | 0 | 0 | 0 |
| 0 | 0 | 0 | 0 | 0 | 0 | 0 | 0 | 0 |
| 0 | 0 | 0 | 0 | 0 | 0 | 0 | 0 | 0 |
| 0 | 0 | 0 | 0 | 0 | 0 | 0 | 0 | 0 |
| 0 | 0 | 0 | 0 | 0 | 0 | 0 | 0 | 0 |
| 0 | 0 | 0 | 0 | 0 | 0 | 0 | 0 | 0 |
| 0 | 0 | 0 | 0 | 0 | 0 | 0 | 0 | 0 |
| 0 | 0 | 0 | 0 | 0 | 0 | 0 | 0 | 0 |
| 0 | 0 | 0 | 0 | 0 | 0 | 0 | 0 | 0 |
| 0 | 0 | 0 | 0 | 0 | 0 | 0 | 0 | 0 |
| 0 | 0 | 0 | 0 | 0 | 0 | 0 | 0 | 0 |
| 0 | 0 | 0 | 0 | 0 | 0 | 0 | 0 | 0 |
| 1 | 1 | 0 | 3 | 0 | 0 | 0 | 0 | 0 |
| 0 | 0 | 0 | 0 | 0 | 1 | 0 | 0 | 0 |

|   |   |   |   |   |   |   |    |   |
|---|---|---|---|---|---|---|----|---|
| 3 | 0 | 0 | 0 | 0 | 0 | 0 | 0  | 0 |
| 0 | 0 | 0 | 0 | 0 | 0 | 0 | 1  | 0 |
| 0 | 0 | 0 | 0 | 0 | 0 | 0 | 0  | 0 |
| 9 | 0 | 0 | 0 | 0 | 0 | 1 | 1  | 6 |
| 0 | 0 | 0 | 0 | 0 | 0 | 0 | 0  | 0 |
| 0 | 0 | 0 | 0 | 0 | 0 | 0 | 0  | 0 |
| 0 | 0 | 0 | 0 | 0 | 0 | 0 | 2  | 0 |
| 0 | 0 | 0 | 0 | 0 | 0 | 0 | 0  | 0 |
| 0 | 0 | 0 | 0 | 0 | 0 | 0 | 0  | 0 |
| 0 | 0 | 0 | 7 | 0 | 0 | 0 | 0  | 0 |
| 0 | 0 | 0 | 2 | 0 | 0 | 0 | 0  | 0 |
| 0 | 0 | 0 | 0 | 0 | 0 | 0 | 0  | 0 |
| 0 | 0 | 0 | 0 | 0 | 1 | 0 | 0  | 0 |
| 0 | 1 | 0 | 3 | 0 | 0 | 0 | 0  | 0 |
| 0 | 0 | 0 | 0 | 0 | 0 | 0 | 0  | 0 |
| 0 | 0 | 0 | 1 | 1 | 1 | 0 | 48 | 0 |
| 0 | 0 | 0 | 0 | 0 | 0 | 0 | 0  | 0 |
| 0 | 0 | 0 | 0 | 0 | 0 | 0 | 0  | 0 |
| 0 | 0 | 0 | 0 | 0 | 0 | 0 | 0  | 0 |
| 0 | 0 | 0 | 0 | 0 | 0 | 0 | 0  | 0 |
| 0 | 0 | 0 | 2 | 0 | 0 | 0 | 0  | 0 |
| 0 | 0 | 0 | 0 | 0 | 0 | 0 | 0  | 0 |
| 0 | 0 | 0 | 0 | 0 | 0 | 0 | 4  | 0 |
| 0 | 0 | 0 | 0 | 0 | 0 | 0 | 0  | 0 |
| 0 | 0 | 0 | 0 | 0 | 0 | 0 | 2  | 0 |
| 0 | 0 | 0 | 0 | 0 | 0 | 0 | 0  | 0 |
| 0 | 0 | 0 | 0 | 0 | 0 | 0 | 0  | 0 |
| 0 | 0 | 0 | 0 | 0 | 0 | 0 | 0  | 0 |
| 0 | 0 | 0 | 0 | 0 | 0 | 0 | 0  | 0 |
| 0 | 0 | 0 | 1 | 0 | 0 | 0 | 0  | 0 |
| 0 | 0 | 0 | 0 | 0 | 0 | 0 | 0  | 0 |
| 0 | 0 | 0 | 0 | 0 | 0 | 0 | 0  | 0 |
| 0 | 0 | 0 | 0 | 0 | 0 | 0 | 0  | 0 |
| 0 | 0 | 0 | 0 | 0 | 0 | 0 | 0  | 0 |
| 0 | 0 | 0 | 1 | 0 | 0 | 0 | 0  | 0 |
| 0 | 0 | 0 | 0 | 0 | 0 | 0 | 0  | 0 |
| 0 | 0 | 0 | 0 | 0 | 0 | 0 | 0  | 0 |
| 0 | 0 | 0 | 1 | 0 | 0 | 0 | 0  | 0 |
| 1 | 0 | 0 | 2 | 0 | 2 | 0 | 2  | 0 |
| 0 | 0 | 0 | 0 | 0 | 1 | 0 | 0  | 1 |
| 0 | 0 | 0 | 0 | 0 | 0 | 0 | 0  | 0 |
| 0 | 0 | 0 | 0 | 0 | 0 | 0 | 0  | 0 |
| 0 | 0 | 0 | 0 | 0 | 0 | 0 | 0  | 0 |
| 0 | 0 | 0 | 0 | 0 | 0 | 0 | 0  | 0 |
| 0 | 0 | 0 | 0 | 0 | 0 | 0 | 0  | 0 |
| 0 | 0 | 0 | 0 | 0 | 0 | 0 | 0  | 0 |
| 0 | 0 | 0 | 0 | 0 | 0 | 0 | 0  | 0 |
| 0 | 0 | 0 | 0 | 0 | 0 | 0 | 0  | 0 |
| 0 | 0 | 0 | 0 | 0 | 0 | 0 | 0  | 0 |
| 0 | 0 | 0 | 0 | 0 | 0 | 0 | 0  | 0 |
| 0 | 0 | 0 | 0 | 0 | 0 | 0 | 0  | 0 |
| 0 | 0 | 0 | 0 | 0 | 0 | 0 | 0  | 0 |
| 0 | 0 | 0 | 0 | 0 | 0 | 0 | 0  | 0 |
| 0 | 0 | 0 | 0 | 0 | 0 | 0 | 0  | 0 |
| 0 | 0 | 0 | 0 | 0 | 0 | 0 | 0  | 0 |
| 0 | 0 | 0 | 0 | 0 | 0 | 0 | 0  | 0 |
| 0 | 0 | 0 | 0 | 0 | 0 | 0 | 0  | 0 |
| 0 | 0 | 0 | 0 | 0 | 0 | 0 | 0  | 0 |
| 0 | 0 | 0 | 0 | 0 | 0 | 0 | 0  | 0 |
| 0 | 0 | 0 | 0 | 0 | 0 | 0 | 0  | 0 |
| 0 | 0 | 0 | 0 | 0 | 0 | 0 | 0  | 0 |
| 0 | 0 | 0 | 0 | 0 | 0 | 0 | 0  | 0 |
| 0 | 0 | 0 | 0 | 0 | 0 | 0 | 0  | 0 |
| 0 | 0 | 0 | 4 | 0 | 0 | 0 | 0  | 0 |
| 0 | 1 | 0 | 0 | 0 | 0 | 1 | 0  | 0 |
| 0 | 1 | 0 | 0 | 0 | 0 | 0 | 3  | 0 |











|    |   |   |   |   |   |   |   |   |
|----|---|---|---|---|---|---|---|---|
| 0  | 0 | 0 | 0 | 0 | 0 | 0 | 0 | 0 |
| 0  | 0 | 0 | 0 | 0 | 0 | 0 | 0 | 0 |
| 0  | 0 | 0 | 0 | 0 | 0 | 0 | 0 | 0 |
| 0  | 0 | 0 | 0 | 0 | 0 | 0 | 0 | 0 |
| 0  | 0 | 0 | 0 | 0 | 0 | 0 | 0 | 0 |
| 13 | 0 | 0 | 0 | 0 | 0 | 0 | 0 | 0 |
| 0  | 0 | 0 | 0 | 0 | 0 | 1 | 0 | 0 |
| 0  | 0 | 0 | 0 | 0 | 0 | 1 | 0 | 0 |
| 0  | 0 | 0 | 0 | 0 | 0 | 0 | 0 | 0 |
| 0  | 0 | 0 | 0 | 0 | 0 | 0 | 0 | 0 |
| 0  | 0 | 0 | 0 | 0 | 0 | 0 | 0 | 0 |
| 0  | 0 | 0 | 0 | 0 | 0 | 0 | 0 | 0 |
| 0  | 0 | 0 | 0 | 0 | 0 | 0 | 0 | 0 |
| 0  | 0 | 0 | 0 | 0 | 0 | 0 | 0 | 0 |
| 0  | 0 | 0 | 0 | 0 | 0 | 0 | 0 | 0 |
| 0  | 0 | 0 | 0 | 0 | 0 | 0 | 0 | 0 |
| 0  | 0 | 0 | 0 | 0 | 0 | 1 | 0 | 0 |
| 1  | 0 | 1 | 0 | 0 | 0 | 0 | 0 | 0 |
| 0  | 0 | 0 | 0 | 0 | 0 | 0 | 0 | 0 |
| 0  | 0 | 0 | 0 | 0 | 0 | 0 | 0 | 0 |
| 0  | 1 | 0 | 0 | 0 | 0 | 1 | 0 | 0 |
| 0  | 0 | 0 | 0 | 0 | 0 | 0 | 0 | 0 |
| 0  | 0 | 0 | 0 | 0 | 0 | 0 | 0 | 0 |
| 0  | 0 | 0 | 0 | 0 | 0 | 0 | 0 | 0 |
| 0  | 0 | 0 | 0 | 0 | 0 | 0 | 0 | 0 |
| 0  | 0 | 0 | 0 | 0 | 0 | 0 | 0 | 0 |
| 0  | 0 | 0 | 0 | 0 | 0 | 0 | 0 | 0 |
| 0  | 0 | 0 | 0 | 0 | 0 | 0 | 0 | 0 |
| 0  | 0 | 0 | 0 | 0 | 0 | 0 | 0 | 0 |
| 0  | 0 | 0 | 0 | 0 | 0 | 0 | 0 | 0 |
| 0  | 0 | 1 | 0 | 0 | 0 | 0 | 0 | 0 |
| 0  | 0 | 2 | 0 | 0 | 0 | 0 | 0 | 0 |
| 1  | 0 | 2 | 0 | 0 | 0 | 0 | 0 | 0 |
| 0  | 0 | 0 | 0 | 0 | 0 | 0 | 0 | 0 |
| 0  | 0 | 0 | 0 | 0 | 0 | 0 | 0 | 0 |
| 0  | 0 | 0 | 0 | 0 | 0 | 0 | 0 | 0 |
| 0  | 0 | 0 | 0 | 0 | 0 | 0 | 0 | 0 |
| 0  | 0 | 0 | 0 | 0 | 0 | 0 | 0 | 0 |
| 0  | 0 | 0 | 0 | 0 | 0 | 0 | 0 | 0 |
| 0  | 0 | 1 | 0 | 0 | 0 | 0 | 0 | 0 |
| 0  | 0 | 0 | 0 | 0 | 0 | 0 | 0 | 0 |
| 0  | 0 | 0 | 0 | 0 | 0 | 0 | 0 | 0 |
| 0  | 0 | 0 | 0 | 0 | 0 | 0 | 0 | 0 |
| 0  | 0 | 0 | 0 | 0 | 0 | 0 | 0 | 0 |
| 0  | 0 | 0 | 0 | 0 | 0 | 0 | 0 | 0 |
| 1  | 0 | 1 | 0 | 0 | 0 | 1 | 0 | 2 |
| 0  | 0 | 0 | 3 | 0 | 0 | 0 | 0 | 0 |
| 0  | 0 | 1 | 0 | 0 | 0 | 0 | 0 | 0 |
| 0  | 0 | 0 | 0 | 0 | 0 | 0 | 0 | 0 |
| 0  | 0 | 0 | 0 | 0 | 0 | 0 | 0 | 0 |
| 0  | 0 | 0 | 0 | 0 | 0 | 0 | 0 | 0 |
| 0  | 0 | 0 | 0 | 0 | 0 | 0 | 3 | 0 |
| 0  | 0 | 0 | 0 | 0 | 0 | 0 | 0 | 0 |
| 0  | 0 | 0 | 1 | 0 | 0 | 0 | 0 | 0 |
| 0  | 0 | 0 | 0 | 0 | 0 | 1 | 1 | 0 |
| 0  | 0 | 0 | 0 | 0 | 0 | 0 | 0 | 0 |
| 0  | 5 | 0 | 0 | 0 | 0 | 0 | 0 | 0 |
| 0  | 0 | 1 | 0 | 0 | 0 | 0 | 0 | 0 |
| 0  | 0 | 0 | 0 | 0 | 0 | 0 | 0 | 0 |
| 0  | 0 | 0 | 0 | 1 | 0 | 0 | 0 | 0 |







|   |   |   |   |   |   |   |   |   |
|---|---|---|---|---|---|---|---|---|
| 0 | 0 | 0 | 0 | 0 | 0 | 0 | 0 | 0 |
| 2 | 0 | 0 | 0 | 0 | 0 | 0 | 0 | 2 |
| 0 | 0 | 0 | 1 | 0 | 0 | 0 | 0 | 0 |
| 0 | 0 | 0 | 0 | 0 | 0 | 1 | 0 | 0 |
| 0 | 1 | 0 | 0 | 0 | 0 | 1 | 0 | 0 |
| 0 | 0 | 0 | 3 | 0 | 0 | 0 | 0 | 0 |
| 0 | 0 | 0 | 0 | 0 | 0 | 0 | 0 | 0 |
| 0 | 0 | 0 | 0 | 0 | 0 | 0 | 0 | 0 |
| 0 | 0 | 0 | 0 | 0 | 0 | 0 | 0 | 0 |
| 0 | 0 | 0 | 0 | 0 | 0 | 0 | 0 | 6 |
| 0 | 0 | 0 | 2 | 0 | 0 | 0 | 0 | 0 |
| 0 | 0 | 0 | 0 | 0 | 0 | 0 | 0 | 0 |
| 0 | 0 | 0 | 0 | 0 | 0 | 1 | 0 | 0 |
| 0 | 0 | 0 | 0 | 0 | 0 | 0 | 0 | 0 |
| 0 | 0 | 0 | 0 | 0 | 0 | 0 | 0 | 0 |
| 0 | 0 | 0 | 0 | 0 | 0 | 0 | 0 | 0 |
| 0 | 0 | 0 | 1 | 0 | 0 | 0 | 0 | 0 |
| 0 | 0 | 0 | 0 | 0 | 0 | 0 | 0 | 0 |
| 0 | 0 | 0 | 0 | 0 | 0 | 0 | 0 | 0 |
| 1 | 0 | 0 | 0 | 0 | 0 | 0 | 0 | 1 |
| 0 | 0 | 0 | 0 | 0 | 0 | 0 | 0 | 0 |
| 0 | 0 | 0 | 0 | 0 | 0 | 0 | 0 | 0 |
| 0 | 0 | 0 | 0 | 0 | 0 | 0 | 0 | 0 |
| 0 | 0 | 0 | 0 | 0 | 0 | 0 | 0 | 0 |
| 0 | 0 | 0 | 1 | 0 | 0 | 4 | 0 | 0 |
| 0 | 0 | 0 | 0 | 0 | 0 | 0 | 0 | 0 |
| 0 | 0 | 0 | 0 | 0 | 0 | 0 | 0 | 0 |
| 0 | 0 | 0 | 0 | 0 | 0 | 0 | 0 | 0 |
| 0 | 0 | 0 | 0 | 0 | 0 | 0 | 0 | 0 |
| 0 | 0 | 0 | 0 | 0 | 0 | 0 | 0 | 0 |
| 0 | 0 | 0 | 0 | 0 | 0 | 0 | 0 | 0 |
| 0 | 0 | 0 | 0 | 0 | 0 | 0 | 0 | 0 |
| 3 | 0 | 0 | 0 | 0 | 0 | 0 | 2 | 0 |
| 0 | 0 | 0 | 0 | 0 | 0 | 1 | 0 | 0 |
| 0 | 0 | 0 | 0 | 0 | 0 | 0 | 0 | 0 |
| 0 | 0 | 0 | 0 | 0 | 0 | 0 | 0 | 0 |
| 0 | 0 | 0 | 0 | 0 | 0 | 0 | 1 | 0 |
| 0 | 0 | 0 | 0 | 0 | 0 | 0 | 0 | 0 |
| 0 | 0 | 0 | 1 | 0 | 0 | 0 | 0 | 0 |
| 0 | 0 | 0 | 0 | 0 | 2 | 0 | 0 | 0 |
| 0 | 0 | 0 | 0 | 0 | 0 | 0 | 0 | 0 |
| 0 | 0 | 0 | 2 | 0 | 0 | 0 | 0 | 0 |
| 0 | 0 | 0 | 0 | 0 | 0 | 0 | 0 | 0 |
| 0 | 0 | 0 | 0 | 0 | 0 | 0 | 0 | 0 |
| 0 | 0 | 0 | 0 | 0 | 0 | 0 | 0 | 0 |
| 0 | 0 | 0 | 0 | 0 | 0 | 0 | 0 | 0 |
| 0 | 0 | 0 | 0 | 0 | 0 | 0 | 0 | 0 |
| 0 | 0 | 0 | 0 | 0 | 0 | 0 | 0 | 0 |
| 0 | 0 | 1 | 0 | 0 | 0 | 0 | 0 | 0 |
| 0 | 0 | 0 | 0 | 0 | 0 | 0 | 0 | 0 |
| 0 | 0 | 0 | 0 | 0 | 0 | 0 | 0 | 0 |
| 0 | 0 | 0 | 0 | 0 | 0 | 0 | 0 | 0 |
| 0 | 0 | 0 | 0 | 0 | 0 | 0 | 0 | 0 |
| 0 | 0 | 0 | 0 | 0 | 0 | 0 | 0 | 0 |
| 0 | 0 | 0 | 0 | 0 | 0 | 0 | 0 | 0 |
| 0 | 0 | 0 | 0 | 0 | 0 | 0 | 0 | 0 |
| 0 | 0 | 0 | 0 | 0 | 0 | 0 | 0 | 0 |
| 0 | 0 | 0 | 0 | 0 | 0 | 0 | 0 | 0 |
| 0 | 0 | 0 | 0 | 0 | 0 | 0 | 0 | 0 |
| 0 | 0 | 0 | 0 | 0 | 0 | 0 | 0 | 0 |
| 0 | 0 | 0 | 0 | 0 | 0 | 0 | 0 | 0 |
| 0 | 0 | 0 | 0 | 0 | 0 | 0 | 0 | 0 |
| 0 | 0 | 0 | 0 | 0 | 0 | 0 | 0 | 0 |
| 0 | 0 | 0 | 0 | 0 | 0 | 0 | 0 | 0 |
| 0 | 1 | 0 | 0 | 0 | 0 | 0 | 0 | 0 |
| 1 | 0 | 0 | 1 | 0 | 0 | 0 | 0 | 0 |
| 0 | 0 | 0 | 0 | 1 | 0 | 0 | 0 | 0 |



















|   |   |   |   |   |   |   |   |   |
|---|---|---|---|---|---|---|---|---|
| 0 | 0 | 0 | 0 | 0 | 1 | 2 | 0 | 0 |
| 0 | 0 | 0 | 0 | 0 | 0 | 0 | 0 | 0 |
| 0 | 0 | 0 | 0 | 0 | 0 | 0 | 0 | 0 |
| 0 | 0 | 0 | 0 | 0 | 0 | 0 | 0 | 0 |
| 0 | 0 | 0 | 0 | 0 | 0 | 0 | 0 | 0 |
| 0 | 0 | 0 | 0 | 0 | 0 | 0 | 0 | 0 |
| 0 | 0 | 0 | 0 | 0 | 0 | 0 | 0 | 2 |
| 0 | 0 | 0 | 0 | 0 | 0 | 0 | 0 | 0 |
| 0 | 0 | 0 | 0 | 0 | 0 | 0 | 0 | 0 |
| 0 | 0 | 0 | 0 | 0 | 0 | 0 | 0 | 0 |
| 0 | 0 | 0 | 0 | 0 | 0 | 0 | 0 | 0 |
| 0 | 0 | 3 | 0 | 0 | 0 | 0 | 0 | 0 |
| 0 | 0 | 0 | 0 | 0 | 0 | 0 | 0 | 0 |
| 0 | 3 | 0 | 0 | 0 | 0 | 0 | 0 | 0 |
| 0 | 0 | 0 | 0 | 0 | 0 | 0 | 0 | 0 |
| 2 | 0 | 0 | 0 | 0 | 0 | 0 | 0 | 0 |
| 0 | 0 | 0 | 0 | 0 | 0 | 0 | 0 | 0 |
| 0 | 0 | 0 | 0 | 0 | 0 | 1 | 0 | 0 |
| 0 | 0 | 0 | 0 | 0 | 0 | 0 | 0 | 0 |
| 0 | 0 | 0 | 0 | 1 | 0 | 0 | 1 | 0 |
| 0 | 0 | 0 | 0 | 0 | 0 | 0 | 0 | 0 |
| 0 | 0 | 0 | 0 | 0 | 0 | 0 | 0 | 0 |
| 0 | 0 | 0 | 0 | 0 | 0 | 0 | 0 | 0 |
| 0 | 0 | 0 | 0 | 0 | 0 | 0 | 0 | 0 |
| 0 | 0 | 0 | 0 | 0 | 0 | 0 | 0 | 0 |
| 0 | 0 | 0 | 0 | 0 | 0 | 0 | 0 | 0 |
| 0 | 0 | 0 | 0 | 0 | 0 | 0 | 0 | 0 |
| 0 | 0 | 0 | 2 | 0 | 0 | 0 | 0 | 0 |
| 0 | 0 | 0 | 0 | 0 | 0 | 0 | 0 | 0 |
| 0 | 0 | 0 | 6 | 0 | 0 | 0 | 0 | 0 |
| 0 | 0 | 0 | 0 | 0 | 0 | 0 | 0 | 0 |
| 0 | 0 | 0 | 0 | 0 | 0 | 0 | 0 | 0 |
| 0 | 0 | 0 | 0 | 0 | 1 | 0 | 0 | 0 |
| 0 | 0 | 0 | 0 | 0 | 0 | 0 | 0 | 0 |
| 0 | 0 | 0 | 0 | 0 | 1 | 0 | 0 | 0 |
| 0 | 0 | 0 | 0 | 0 | 0 | 0 | 0 | 0 |
| 2 | 0 | 0 | 0 | 0 | 0 | 0 | 0 | 0 |
| 0 | 0 | 0 | 0 | 0 | 0 | 0 | 0 | 0 |
| 0 | 0 | 0 | 0 | 0 | 0 | 0 | 0 | 0 |
| 0 | 0 | 0 | 0 | 0 | 0 | 0 | 0 | 0 |
| 0 | 0 | 4 | 0 | 0 | 0 | 0 | 0 | 0 |
| 0 | 0 | 0 | 0 | 0 | 0 | 0 | 0 | 0 |
| 0 | 0 | 0 | 0 | 0 | 0 | 0 | 0 | 0 |
| 0 | 0 | 0 | 0 | 0 | 0 | 0 | 0 | 0 |
| 0 | 0 | 0 | 0 | 0 | 0 | 0 | 0 | 0 |
| 0 | 0 | 0 | 0 | 0 | 0 | 2 | 0 | 0 |
| 0 | 1 | 0 | 1 | 0 | 0 | 0 | 0 | 0 |
| 0 | 0 | 0 | 0 | 0 | 0 | 0 | 0 | 0 |
| 0 | 0 | 0 | 0 | 1 | 0 | 0 | 0 | 0 |
| 0 | 0 | 0 | 0 | 0 | 0 | 0 | 0 | 0 |
| 0 | 1 | 0 | 0 | 0 | 1 | 0 | 0 | 0 |































|      |      |      |      |      |      |      |      |      |
|------|------|------|------|------|------|------|------|------|
| 0    | 0    | 0    | 0    | 0    | 0    | 0    | 0    | 0    |
| 0    | 0    | 0    | 0    | 0    | 0    | 0    | 0    | 0    |
| 0    | 0    | 0    | 0    | 0    | 0    | 1    | 0    | 0    |
| 0    | 0    | 0    | 0    | 0    | 0    | 0    | 0    | 0    |
| 0    | 0    | 0    | 0    | 0    | 0    | 0    | 0    | 0    |
| 0    | 0    | 0    | 0    | 0    | 0    | 0    | 0    | 0    |
| 0    | 4    | 0    | 2    | 3    | 0    | 7    | 0    | 0    |
| 0    | 0    | 0    | 0    | 0    | 0    | 0    | 0    | 0    |
| 0    | 0    | 0    | 0    | 0    | 0    | 0    | 0    | 0    |
| 0    | 0    | 0    | 0    | 0    | 0    | 0    | 0    | 0    |
| 0    | 0    | 0    | 2    | 0    | 0    | 0    | 5    | 0    |
| 0    | 0    | 0    | 0    | 0    | 0    | 0    | 0    | 0    |
| 0    | 0    | 0    | 0    | 0    | 0    | 0    | 0    | 0    |
| 0    | 0    | 0    | 0    | 0    | 0    | 0    | 0    | 0    |
| 1    | 0    | 0    | 0    | 0    | 0    | 0    | 0    | 0    |
| 0    | 0    | 0    | 0    | 0    | 0    | 0    | 0    | 0    |
| 0    | 0    | 0    | 0    | 0    | 0    | 0    | 0    | 0    |
| 0    | 0    | 0    | 0    | 0    | 0    | 0    | 0    | 0    |
| 0    | 1    | 0    | 0    | 0    | 1    | 0    | 0    | 0    |
| 0    | 0    | 0    | 0    | 0    | 0    | 0    | 0    | 0    |
| 0    | 0    | 0    | 4    | 0    | 0    | 0    | 0    | 0    |
| 0    | 0    | 0    | 0    | 0    | 0    | 0    | 0    | 0    |
| 0    | 0    | 0    | 0    | 0    | 2    | 0    | 2    | 0    |
| 0    | 0    | 0    | 0    | 0    | 0    | 0    | 0    | 0    |
| 0    | 0    | 0    | 0    | 0    | 0    | 0    | 0    | 0    |
| 0    | 0    | 0    | 0    | 0    | 0    | 0    | 0    | 0    |
| 0    | 0    | 0    | 0    | 0    | 0    | 0    | 0    | 0    |
| 0    | 0    | 0    | 0    | 0    | 0    | 0    | 0    | 0    |
| 0    | 0    | 0    | 0    | 0    | 0    | 0    | 0    | 0    |
| 0    | 0    | 0    | 0    | 0    | 0    | 0    | 0    | 0    |
| 0    | 0    | 0    | 0    | 0    | 0    | 0    | 0    | 0    |
| 0    | 0    | 0    | 0    | 0    | 0    | 0    | 0    | 0    |
| 0    | 0    | 0    | 0    | 0    | 0    | 0    | 0    | 0    |
| 0    | 0    | 0    | 0    | 0    | 0    | 0    | 0    | 0    |
| 0    | 0    | 0    | 0    | 0    | 0    | 0    | 0    | 0    |
| 0    | 0    | 0    | 0    | 0    | 0    | 0    | 0    | 0    |
| 0    | 0    | 0    | 0    | 0    | 0    | 0    | 0    | 0    |
| 9305 | 9167 | 7396 | 8869 | 7652 | 7332 | 7938 | 7295 | 8104 |

| 018S | 019S | 002S | 025S | taxonomy                                                        |
|------|------|------|------|-----------------------------------------------------------------|
| 0    | 0    | 0    | 0    | 0 [u'k__Bacteria', u'p__Actinobacteria', u'c__Actinobacteria    |
| 0    | 0    | 0    | 0    | 0 [u'k__Bacteria', u'p__Firmicutes', u'c__Clostridia', u'o__C   |
| 0    | 0    | 0    | 0    | 0 [u'k__Bacteria', u'p__Firmicutes', u'c__Bacilli', u'o__Bacill |
| 0    | 0    | 0    | 0    | 0 [u'k__Bacteria', u'p__Proteobacteria', u'c__Gammaprotec       |
| 0    | 0    | 0    | 0    | 0 [u'k__Bacteria', u'p__Actinobacteria', u'c__Actinobacteria    |
| 0    | 0    | 0    | 0    | 0 [u'k__Bacteria', u'p__Bacteroidetes', u'c__Bacteroidia', u'   |
| 0    | 0    | 0    | 0    | 0 [u'k__Bacteria', u'p__Bacteroidetes', u'c__Bacteroidia', u'   |
| 0    | 0    | 0    | 0    | 0 [u'k__Bacteria', u'p__Firmicutes', u'c__Erysipelotrichi', u'c |
| 0    | 0    | 0    | 0    | 0 [u'k__Bacteria', u'p__Proteobacteria', u'c__Gammaprotec       |
| 0    | 0    | 0    | 0    | 0 [u'k__Bacteria', u'p__Firmicutes', u'c__Bacilli', u'o__Lactc  |
| 0    | 0    | 0    | 0    | 0 [u'k__Bacteria', u'p__Actinobacteria', u'c__Actinobacteria    |
| 0    | 0    | 0    | 0    | 0 [u'k__Bacteria', u'p__Firmicutes', u'c__Bacilli', u'o__Lactc  |
| 0    | 0    | 0    | 0    | 0 [u'k__Bacteria', u'p__Proteobacteria', u'c__Gammaprotec       |
| 0    | 0    | 0    | 0    | 0 [u'k__Bacteria', u'p__Firmicutes', u'c__Clostridia', u'o__C   |
| 0    | 0    | 0    | 0    | 0 [u'k__Bacteria', u'p__Proteobacteria', u'c__Gammaprotec       |
| 0    | 0    | 0    | 0    | 0 [u'k__Bacteria', u'p__Firmicutes', u'c__Clostridia', u'o__C   |
| 0    | 0    | 0    | 0    | 0 [u'k__Bacteria', u'p__Firmicutes', u'c__Bacilli', u'o__Lactc  |
| 0    | 0    | 0    | 0    | 0 [u'k__Bacteria', u'p__Firmicutes', u'c__Bacilli', u'o__Lactc  |
| 0    | 0    | 0    | 0    | 0 [u'k__Bacteria', u'p__Firmicutes', u'c__Bacilli', u'o__Lactc  |
| 0    | 0    | 0    | 0    | 0 [u'k__Bacteria', u'p__Firmicutes', u'c__Clostridia', u'o__C   |
| 3    | 3    | 0    | 0    | 0 [u'k__Bacteria', u'p__Proteobacteria', u'c__Gammaprotec       |
| 0    | 0    | 0    | 0    | 0 [u'k__Bacteria', u'p__Firmicutes', u'c__Clostridia', u'o__C   |
| 798  | 248  | 68   | 14   | [u'k__Bacteria', u'p__Firmicutes', u'c__Bacilli', u'o__Lactc    |
| 1    | 1    | 0    | 0    | 0 [u'k__Bacteria', u'p__Firmicutes', u'c__Bacilli', u'o__Lactc  |
| 0    | 0    | 0    | 0    | 0 [u'k__Bacteria', u'p__Firmicutes', u'c__Bacilli', u'o__Bacill |
| 0    | 0    | 0    | 0    | 0 [u'k__Bacteria', u'p__Proteobacteria', u'c__Alphaproteoba     |
| 0    | 0    | 0    | 0    | 0 [u'k__Bacteria', u'p__Firmicutes', u'c__Bacilli', u'o__Lactc  |
| 0    | 0    | 0    | 0    | 0 [u'k__Bacteria', u'p__Proteobacteria', u'c__Betaproteoba      |
| 0    | 0    | 0    | 0    | 0 [u'k__Bacteria', u'p__Firmicutes', u'c__Bacilli', u'o__Lactc  |
| 0    | 0    | 0    | 0    | 0 [u'k__Bacteria', u'p__Firmicutes', u'c__Clostridia', u'o__C   |
| 0    | 0    | 0    | 0    | 0 [u'k__Bacteria', u'p__Actinobacteria', u'c__Coriobacteriia'   |
| 0    | 0    | 0    | 0    | 0 [u'k__Bacteria', u'p__Firmicutes', u'c__Bacilli', u'o__Lactc  |
| 0    | 0    | 0    | 0    | 0 [u'k__Bacteria', u'p__Proteobacteria', u'c__Gammaprotec       |
| 0    | 0    | 0    | 0    | 0 [u'k__Bacteria', u'p__Proteobacteria', u'c__Betaproteoba      |
| 0    | 0    | 0    | 0    | 0 [u'k__Bacteria', u'p__Proteobacteria', u'c__Alphaproteoba     |
| 0    | 0    | 0    | 0    | 0 [u'k__Bacteria', u'p__Firmicutes', u'c__Clostridia', u'o__C   |
| 3    | 1    | 0    | 0    | 0 [u'k__Bacteria', u'p__Firmicutes', u'c__Bacilli', u'o__Lactc  |
| 0    | 0    | 0    | 0    | 0 [u'k__Bacteria', u'p__Firmicutes', u'c__Clostridia', u'o__C   |
| 4    | 0    | 0    | 0    | 0 [u'k__Bacteria', u'p__Firmicutes', u'c__Clostridia', u'o__C   |
| 0    | 0    | 0    | 0    | 0 [u'k__Bacteria', u'p__Firmicutes', u'c__Clostridia', u'o__C   |
| 1    | 0    | 0    | 0    | 0 [u'k__Bacteria', u'p__Firmicutes', u'c__Bacilli', u'o__Bacill |
| 0    | 0    | 0    | 0    | 0 [u'k__Bacteria', u'p__Firmicutes', u'c__Bacilli', u'o__Bacill |
| 0    | 0    | 0    | 0    | 0 [u'k__Bacteria', u'p__Firmicutes', u'c__Bacilli', u'o__Lactc  |
| 0    | 0    | 0    | 0    | 0 [u'k__Bacteria', u'p__Firmicutes', u'c__Clostridia', u'o__C   |
| 0    | 0    | 0    | 0    | 0 [u'k__Bacteria', u'p__Proteobacteria', u'c__Gammaprotec       |
| 0    | 0    | 0    | 0    | 0 [u'k__Bacteria', u'p__Firmicutes', u'c__Clostridia', u'o__C   |
| 1    | 0    | 0    | 0    | 0 [u'k__Bacteria', u'p__Proteobacteria', u'c__Gammaprotec       |
| 0    | 0    | 0    | 0    | 0 [u'k__Bacteria', u'p__Firmicutes', u'c__Clostridia', u'o__C   |
| 0    | 5    | 0    | 0    | 0 [u'k__Bacteria', u'p__Firmicutes', u'c__Clostridia', u'o__C   |
| 0    | 0    | 0    | 0    | 0 [u'k__Bacteria', u'p__Firmicutes', u'c__Bacilli', u'o__Lactc  |
| 0    | 0    | 0    | 0    | 0 [u'k__Bacteria', u'p__Firmicutes', u'c__Clostridia', u'o__C   |
| 0    | 0    | 0    | 0    | 0 [u'k__Bacteria', u'p__Firmicutes', u'c__Clostridia', u'o__C   |

|      |    |   |                                                                  |
|------|----|---|------------------------------------------------------------------|
| 2    | 0  | 0 | 0 [u'k__Bacteria', u'p__Firmicutes', u'c__Bacilli', u'o__Lactc   |
| 0    | 1  | 0 | 0 [u'k__Bacteria', u'p__Proteobacteria', u'c__Gammaprotec        |
| 0    | 0  | 0 | 0 [u'k__Bacteria', u'p__Firmicutes', u'c__Bacilli', u'o__Lactc   |
| 0    | 0  | 0 | 0 [u'k__Bacteria', u'p__Actinobacteria', u'c__Coriobacteriia'    |
| 0    | 0  | 0 | 0 [u'k__Bacteria', u'p__SR1', u'c__', u'o__', u'f__', u'g__', u' |
| 0    | 1  | 0 | 0 [u'k__Bacteria', u'p__Proteobacteria', u'c__Gammaprotec        |
| 0    | 0  | 0 | 0 [u'k__Bacteria', u'p__Firmicutes', u'c__Clostridia', u'o__C    |
| 0    | 0  | 1 | 0 [u'k__Bacteria', u'p__Actinobacteria', u'c__Actinobacteria     |
| 0    | 0  | 0 | 0 [u'k__Bacteria', u'p__Bacteroidetes', u'c__Bacteroidia', u'    |
| 0    | 0  | 0 | 1 [u'k__Bacteria', u'p__Firmicutes', u'c__Clostridia', u'o__C    |
| 0    | 0  | 0 | 0 [u'k__Bacteria', u'p__Firmicutes', u'c__Clostridia', u'o__C    |
| 0    | 0  | 0 | 0 [u'k__Bacteria', u'p__Proteobacteria', u'c__Gammaprotec        |
| 0    | 0  | 0 | 0 [u'k__Bacteria', u'p__Firmicutes', u'c__Bacilli', u'o__Lactc   |
| 3    | 6  | 0 | 1 [u'k__Bacteria', u'p__Proteobacteria', u'c__Gammaprotec        |
| 0    | 0  | 0 | 0 [u'k__Bacteria', u'p__Firmicutes', u'c__Bacilli', u'o__Bacill  |
| 0    | 0  | 0 | 0 [u'k__Bacteria', u'p__Actinobacteria', u'c__Actinobacteria     |
| 0    | 0  | 2 | 0 [u'k__Bacteria', u'p__Bacteroidetes', u'c__Bacteroidia', u'    |
| 0    | 0  | 0 | 0 [u'k__Bacteria', u'p__Firmicutes', u'c__Bacilli', u'o__Bacill  |
| 0    | 0  | 0 | 0 [u'k__Bacteria', u'p__Actinobacteria', u'c__Actinobacteria     |
| 0    | 0  | 0 | 0 [u'k__Bacteria', u'p__Firmicutes', u'c__Bacilli', u'o__Lactc   |
| 0    | 0  | 0 | 0 [u'k__Bacteria', u'p__Proteobacteria', u'c__Alphaproteoba      |
| 9    | 16 | 1 | 2 [u'k__Bacteria', u'p__Proteobacteria', u'c__Gammaprotec        |
| 0    | 0  | 0 | 0 [u'k__Bacteria', u'p__Bacteroidetes', u'c__Bacteroidia', u'    |
| 0    | 0  | 0 | 0 [u'k__Bacteria', u'p__Firmicutes', u'c__Bacilli', u'o__Lactc   |
| 0    | 0  | 0 | 0 [u'k__Bacteria', u'p__Firmicutes', u'c__Clostridia', u'o__C    |
| 0    | 0  | 0 | 0 [u'k__Bacteria', u'p__Firmicutes', u'c__Clostridia', u'o__C    |
| 0    | 0  | 0 | 0 [u'k__Bacteria', u'p__Firmicutes', u'c__Clostridia', u'o__C    |
| 0    | 0  | 0 | 0 [u'k__Bacteria', u'p__Firmicutes', u'c__Clostridia', u'o__C    |
| 0    | 0  | 0 | 0 [u'k__Bacteria', u'p__Bacteroidetes', u'c__Bacteroidia', u'    |
| 0    | 0  | 0 | 0 [u'k__Bacteria', u'p__Firmicutes', u'c__Clostridia', u'o__C    |
| 1    | 0  | 0 | 0 [u'k__Bacteria', u'p__Bacteroidetes', u'c__Bacteroidia', u'    |
| 0    | 0  | 0 | 0 [u'k__Bacteria', u'p__Proteobacteria', u'c__Gammaprotec        |
| 0    | 0  | 0 | 0 [u'k__Bacteria', u'p__Actinobacteria', u'c__Rubrobacteria'     |
| 0    | 0  | 0 | 0 [u'k__Bacteria', u'p__Proteobacteria', u'c__Gammaprotec        |
| 0    | 0  | 0 | 0 [u'k__Bacteria', u'p__Proteobacteria', u'c__Gammaprotec        |
| 0    | 0  | 0 | 10 [u'k__Bacteria', u'p__Firmicutes', u'c__Clostridia', u'o__C   |
| 0    | 0  | 0 | 0 [u'k__Bacteria', u'p__Proteobacteria', u'c__Alphaproteoba      |
| 0    | 0  | 0 | 0 [u'k__Bacteria', u'p__Proteobacteria', u'c__Deltaproteoba      |
| 0    | 0  | 0 | 0 [u'k__Bacteria', u'p__Firmicutes', u'c__Clostridia', u'o__C    |
| 0    | 0  | 0 | 0 [u'k__Bacteria', u'p__Firmicutes', u'c__Clostridia', u'o__C    |
| 0    | 0  | 0 | 0 [u'k__Bacteria', u'p__Firmicutes', u'c__Bacilli', u'o__Lactc   |
| 0    | 0  | 0 | 0 [u'k__Bacteria', u'p__Firmicutes', u'c__Clostridia', u'o__C    |
| 0    | 0  | 0 | 0 [u'k__Bacteria', u'p__Firmicutes', u'c__Bacilli', u'o__Bacill  |
| 2087 | 0  | 0 | 363 [u'k__Bacteria', u'p__Firmicutes', u'c__Clostridia', u'o__C  |
| 0    | 0  | 0 | 2 [u'k__Bacteria', u'p__Firmicutes', u'c__Clostridia', u'o__C    |
| 0    | 0  | 0 | 0 [u'k__Bacteria', u'p__Firmicutes', u'c__Bacilli', u'o__Lactc   |
| 0    | 0  | 0 | 0 [u'k__Bacteria', u'p__Firmicutes', u'c__Bacilli', u'o__Lactc   |
| 0    | 0  | 0 | 0 [u'k__Bacteria', u'p__Bacteroidetes', u'c__Bacteroidia', u'    |
| 4    | 6  | 0 | 0 [u'k__Bacteria', u'p__Proteobacteria', u'c__Gammaprotec        |
| 0    | 0  | 0 | 0 [u'k__Bacteria', u'p__Proteobacteria', u'c__Gammaprotec        |
| 0    | 0  | 0 | 0 [u'k__Bacteria', u'p__Proteobacteria', u'c__Gammaprotec        |
| 0    | 0  | 0 | 0 [u'k__Bacteria', u'p__Firmicutes', u'c__Clostridia', u'o__C    |
| 0    | 0  | 1 | 0 [u'k__Bacteria', u'p__Bacteroidetes', u'c__Bacteroidia', u'    |
| 0    | 0  | 0 | 0 [u'k__Bacteria', u'p__Actinobacteria', u'c__Actinobacteria     |
| 0    | 0  | 0 | 0 [u'k__Bacteria', u'p__Firmicutes', u'c__Bacilli', u'o__Gem     |
| 0    | 0  | 0 | 0 [u'k__Bacteria', u'p__Actinobacteria', u'c__Actinobacteria     |

|     |     |   |                                                                 |
|-----|-----|---|-----------------------------------------------------------------|
| 0   | 0   | 0 | 0 [u'k__Bacteria', u'p__Firmicutes', u'c__Clostridia', u'o__C   |
| 28  | 0   | 2 | 0 [u'k__Bacteria', u'p__Bacteroidetes', u'c__Bacteroidia', u'   |
| 0   | 0   | 0 | 0 [u'k__Bacteria', u'p__Firmicutes', u'c__Clostridia', u'o__C   |
| 0   | 0   | 0 | 0 [u'k__Bacteria', u'p__Firmicutes', u'c__Clostridia', u'o__C   |
| 0   | 0   | 0 | 0 [u'k__Bacteria', u'p__Proteobacteria', u'c__Gammaprotec       |
| 0   | 0   | 0 | 0 [u'k__Bacteria', u'p__Firmicutes', u'c__Bacilli', u'o__Bacill |
| 1   | 1   | 0 | 0 [u'k__Bacteria', u'p__Firmicutes', u'c__Bacilli', u'o__Lactc  |
| 0   | 0   | 0 | 0 [u'k__Bacteria', u'p__Firmicutes', u'c__Clostridia', u'o__C   |
| 0   | 0   | 1 | 0 [u'k__Bacteria', u'p__Actinobacteria', u'c__Actinobacteria    |
| 0   | 0   | 0 | 0 [u'k__Bacteria', u'p__Actinobacteria', u'c__Actinobacteria    |
| 0   | 0   | 0 | 0 [u'k__Bacteria', u'p__Proteobacteria', u'c__Betaproteoba      |
| 0   | 1   | 0 | 0 [u'k__Bacteria', u'p__Proteobacteria', u'c__Gammaprotec       |
| 0   | 0   | 0 | 0 [u'k__Bacteria', u'p__[Thermi]', u'c__Deinococci', u'o__De    |
| 0   | 0   | 0 | 0 [u'k__Bacteria', u'p__Bacteroidetes', u'c__Bacteroidia', u'   |
| 0   | 0   | 0 | 0 [u'k__Bacteria', u'p__Firmicutes', u'c__Clostridia', u'o__C   |
| 0   | 0   | 0 | 0 [u'k__Bacteria', u'p__Bacteroidetes', u'c__Bacteroidia', u'   |
| 0   | 0   | 0 | 0 [u'k__Bacteria', u'p__Firmicutes', u'c__Bacilli', u'o__Lactc  |
| 0   | 0   | 0 | 0 [u'k__Bacteria', u'p__Cyanobacteria', u'c__Chloroplast', u    |
| 0   | 0   | 0 | 0 [u'k__Bacteria', u'p__Firmicutes', u'c__Clostridia', u'o__C   |
| 0   | 0   | 0 | 0 [u'k__Bacteria', u'p__Proteobacteria', u'c__Gammaprotec       |
| 1   | 0   | 0 | 0 [u'k__Bacteria', u'p__Firmicutes', u'c__Clostridia', u'o__C   |
| 0   | 0   | 0 | 0 [u'k__Bacteria', u'p__Firmicutes', u'c__Bacilli', u'o__Lactc  |
| 0   | 0   | 0 | 0 [u'k__Bacteria', u'p__Firmicutes', u'c__Erysipelotrichi', u'c |
| 0   | 0   | 0 | 0 [u'k__Bacteria', u'p__Actinobacteria', u'c__Actinobacteria    |
| 0   | 0   | 0 | 0 [u'k__Bacteria', u'p__Proteobacteria', u'c__Gammaprotec       |
| 0   | 0   | 0 | 0 [u'k__Bacteria', u'p__Firmicutes', u'c__Clostridia', u'o__C   |
| 0   | 2   | 0 | 0 [u'k__Bacteria', u'p__Firmicutes', u'c__Clostridia', u'o__C   |
| 0   | 0   | 0 | 0 [u'k__Bacteria', u'p__Firmicutes', u'c__Bacilli', u'o__Lactc  |
| 0   | 0   | 0 | 0 [u'k__Bacteria', u'p__Proteobacteria', u'c__Gammaprotec       |
| 0   | 0   | 0 | 0 [u'k__Bacteria', u'p__Firmicutes', u'c__Clostridia', u'o__C   |
| 0   | 0   | 0 | 0 [u'k__Bacteria', u'p__Proteobacteria', u'c__Gammaprotec       |
| 0   | 0   | 0 | 0 [u'k__Bacteria', u'p__Proteobacteria', u'c__Alphaproteoba     |
| 0   | 0   | 0 | 0 [u'k__Bacteria', u'p__Firmicutes', u'c__Bacilli', u'o__Lactc  |
| 0   | 0   | 0 | 0 [u'k__Bacteria', u'p__Firmicutes', u'c__Bacilli', u'o__Bacill |
| 0   | 0   | 0 | 0 [u'k__Bacteria', u'p__Firmicutes', u'c__Bacilli', u'o__Gem    |
| 0   | 0   | 0 | 0 [u'k__Bacteria', u'p__Bacteroidetes', u'c__Bacteroidia', u'   |
| 0   | 0   | 0 | 0 [u'k__Bacteria', u'p__Firmicutes', u'c__Bacilli', u'o__Bacill |
| 125 | 277 | 5 | 36 [u'k__Bacteria', u'p__Proteobacteria', u'c__Gammaprotec      |
| 0   | 0   | 0 | 0 [u'k__Bacteria', u'p__Firmicutes', u'c__Bacilli', u'o__Lactc  |
| 0   | 0   | 0 | 0 [u'k__Bacteria', u'p__Firmicutes', u'c__Bacilli', u'o__Lactc  |
| 0   | 0   | 0 | 0 [u'k__Bacteria', u'p__Proteobacteria', u'c__Betaproteoba      |
| 0   | 0   | 0 | 0 [u'k__Bacteria', u'p__Proteobacteria', u'c__Betaproteoba      |
| 0   | 0   | 0 | 0 [u'k__Bacteria', u'p__Proteobacteria', u'c__Gammaprotec       |
| 0   | 0   | 0 | 0 [u'k__Bacteria', u'p__Actinobacteria', u'c__Actinobacteria    |
| 0   | 0   | 0 | 0 [u'k__Bacteria', u'p__Firmicutes', u'c__Clostridia', u'o__C   |
| 1   | 4   | 0 | 0 [u'k__Bacteria', u'p__Proteobacteria', u'c__Gammaprotec       |
| 4   | 14  | 0 | 0 [u'k__Bacteria', u'p__Firmicutes', u'c__Clostridia', u'o__C   |
| 0   | 0   | 0 | 0 [u'k__Bacteria', u'p__Firmicutes', u'c__Bacilli', u'o__Lactc  |
| 0   | 0   | 0 | 0 [u'k__Bacteria', u'p__Firmicutes', u'c__Clostridia', u'o__C   |
| 0   | 0   | 7 | 0 [u'k__Bacteria', u'p__Bacteroidetes', u'c__Bacteroidia', u'   |
| 1   | 2   | 0 | 0 [u'k__Bacteria', u'p__Firmicutes', u'c__Bacilli', u'o__Lactc  |
| 0   | 0   | 0 | 0 [u'k__Bacteria', u'p__Bacteroidetes', u'c__Bacteroidia', u'   |
| 0   | 0   | 0 | 0 [u'k__Bacteria', u'p__Firmicutes', u'c__Clostridia', u'o__C   |
| 0   | 0   | 0 | 0 [u'k__Bacteria', u'p__Firmicutes', u'c__Clostridia', u'o__C   |
| 0   | 0   | 0 | 0 [u'k__Bacteria', u'p__Proteobacteria', u'c__Gammaprotec       |
| 0   | 0   | 0 | 0 [u'k__Bacteria', u'p__Firmicutes', u'c__Clostridia', u'o__C   |

|     |     |     |                                                                 |
|-----|-----|-----|-----------------------------------------------------------------|
| 0   | 0   | 0   | 1 [u'k__Bacteria', u'p__Bacteroidetes', u'c__Bacteroidia', u'   |
| 0   | 0   | 0   | 0 [u'k__Bacteria', u'p__Proteobacteria', u'c__Gammaprotec       |
| 0   | 0   | 0   | 0 [u'k__Bacteria', u'p__Firmicutes', u'c__Bacilli', u'o__Bacill |
| 0   | 0   | 0   | 0 [u'k__Bacteria', u'p__Proteobacteria', u'c__Gammaprotec       |
| 0   | 0   | 0   | 0 [u'k__Bacteria', u'p__Proteobacteria', u'c__Gammaprotec       |
| 0   | 0   | 0   | 2 [u'k__Bacteria', u'p__Firmicutes', u'c__Clostridia', u'o__C   |
| 0   | 0   | 0   | 0 [u'k__Bacteria', u'p__Actinobacteria', u'c__Actinobacteria    |
| 0   | 0   | 0   | 0 [u'k__Bacteria', u'p__Firmicutes', u'c__Clostridia', u'o__C   |
| 0   | 0   | 0   | 0 [u'k__Bacteria', u'p__Firmicutes', u'c__Bacilli', u'o__Bacill |
| 133 | 3   | 0   | 0 [u'k__Bacteria', u'p__Firmicutes', u'c__Clostridia', u'o__C   |
| 1   | 0   | 0   | 0 [u'k__Bacteria', u'p__Proteobacteria', u'c__Gammaprotec       |
| 0   | 0   | 0   | 0 [u'k__Bacteria', u'p__Proteobacteria', u'c__Betaproteoba      |
| 1   | 0   | 0   | 1 [u'k__Bacteria', u'p__Proteobacteria', u'c__Gammaprotec       |
| 0   | 0   | 0   | 0 [u'k__Bacteria', u'p__Firmicutes', u'c__Bacilli', u'o__Lactc  |
| 1   | 0   | 0   | 0 [u'k__Bacteria', u'p__Proteobacteria', u'c__Gammaprotec       |
| 0   | 0   | 0   | 0 [u'k__Bacteria', u'p__Proteobacteria', u'c__Gammaprotec       |
| 4   | 0   | 0   | 0 [u'k__Bacteria', u'p__Proteobacteria', u'c__Gammaprotec       |
| 0   | 0   | 0   | 0 [u'k__Bacteria', u'p__Proteobacteria', u'c__Gammaprotec       |
| 0   | 0   | 0   | 0 [u'k__Bacteria', u'p__Proteobacteria', u'c__Gammaprotec       |
| 1   | 0   | 0   | 0 [u'k__Bacteria', u'p__Proteobacteria', u'c__Gammaprotec       |
| 0   | 0   | 0   | 0 [u'k__Bacteria', u'p__Proteobacteria', u'c__Alphaproteoba     |
| 48  | 110 | 1   | 18 [u'k__Bacteria', u'p__Proteobacteria', u'c__Gammaprotec      |
| 0   | 0   | 0   | 0 [u'k__Bacteria', u'p__Proteobacteria', u'c__Betaproteoba      |
| 0   | 0   | 0   | 0 [u'k__Bacteria', u'p__Firmicutes', u'c__Clostridia', u'o__C   |
| 0   | 0   | 0   | 0 [u'k__Bacteria', u'p__Bacteroidetes', u'c__Bacteroidia', u'   |
| 2   | 0   | 0   | 0 [u'k__Bacteria', u'p__Firmicutes', u'c__Clostridia', u'o__C   |
| 0   | 0   | 0   | 0 [u'k__Bacteria', u'p__Bacteroidetes', u'c__Bacteroidia', u'   |
| 0   | 0   | 204 | 31 [u'k__Bacteria', u'p__Actinobacteria', u'c__Actinobacteria   |
| 0   | 0   | 0   | 0 [u'k__Bacteria', u'p__Firmicutes', u'c__Bacilli', u'o__Lactc  |
| 0   | 0   | 0   | 0 [u'k__Bacteria', u'p__Firmicutes', u'c__Bacilli', u'o__Lactc  |
| 0   | 0   | 0   | 0 [u'k__Bacteria', u'p__Bacteroidetes', u'c__Bacteroidia', u'   |
| 0   | 0   | 0   | 0 [u'k__Bacteria', u'p__Firmicutes', u'c__Bacilli', u'o__Lactc  |
| 0   | 0   | 0   | 0 [u'k__Bacteria', u'p__Firmicutes', u'c__Clostridia', u'o__C   |
| 0   | 0   | 0   | 0 [u'k__Bacteria', u'p__Firmicutes', u'c__Clostridia', u'o__C   |
| 2   | 5   | 1   | 0 [u'k__Bacteria', u'p__Firmicutes', u'c__Clostridia', u'o__C   |
| 0   | 1   | 0   | 0 [u'k__Bacteria', u'p__Firmicutes', u'c__Clostridia', u'o__C   |
| 0   | 0   | 0   | 0 [u'k__Bacteria', u'p__Proteobacteria', u'c__Alphaproteoba     |
| 0   | 0   | 0   | 4 [u'k__Bacteria', u'p__Firmicutes', u'c__Erysipelotrichi', u'c |
| 0   | 0   | 0   | 0 [u'k__Bacteria', u'p__Proteobacteria', u'c__Gammaprotec       |
| 0   | 0   | 0   | 0 [u'k__Bacteria', u'p__Firmicutes', u'c__Clostridia', u'o__C   |
| 0   | 0   | 0   | 5 [u'k__Bacteria', u'p__Firmicutes', u'c__Clostridia', u'o__C   |
| 0   | 0   | 0   | 0 [u'k__Bacteria', u'p__Proteobacteria', u'c__Gammaprotec       |
| 0   | 0   | 0   | 0 [u'k__Bacteria', u'p__Proteobacteria', u'c__Alphaproteoba     |
| 1   | 0   | 0   | 0 [u'k__Bacteria', u'p__Proteobacteria', u'c__Gammaprotec       |
| 0   | 0   | 0   | 0 [u'k__Bacteria', u'p__Proteobacteria', u'c__Alphaproteoba     |
| 0   | 0   | 0   | 0 [u'k__Bacteria', u'p__Firmicutes', u'c__Clostridia', u'o__C   |
| 0   | 0   | 0   | 0 [u'k__Bacteria', u'p__Proteobacteria', u'c__Gammaprotec       |
| 0   | 0   | 0   | 0 [u'k__Bacteria', u'p__Proteobacteria', u'c__Alphaproteoba     |
| 0   | 0   | 0   | 0 [u'k__Bacteria', u'p__Firmicutes', u'c__Clostridia', u'o__C   |
| 0   | 0   | 0   | 0 [u'k__Bacteria', u'p__Firmicutes', u'c__Clostridia', u'o__C   |
| 0   | 0   | 0   | 0 [u'k__Bacteria', u'p__Actinobacteria', u'c__Actinobacteria    |
| 0   | 0   | 26  | 0 [u'k__Bacteria', u'p__Proteobacteria', u'c__Deltaproteoba     |
| 0   | 0   | 0   | 0 [u'k__Bacteria', u'p__Actinobacteria', u'c__Actinobacteria    |
| 0   | 1   | 0   | 2 [u'k__Bacteria', u'p__Proteobacteria', u'c__Gammaprotec       |
| 0   | 0   | 0   | 0 [u'k__Bacteria', u'p__Firmicutes', u'c__Bacilli', u'o__Bacill |
| 0   | 0   | 0   | 0 [u'k__Bacteria', u'p__Firmicutes', u'c__Bacilli', u'o__Lactc  |









|     |      |    |     |                                                               |
|-----|------|----|-----|---------------------------------------------------------------|
| 5   | 8    | 0  | 194 | [u'k__Bacteria', u'p__Proteobacteria', u'c__Gammaprotec       |
| 0   | 2    | 0  | 0   | [u'k__Bacteria', u'p__Proteobacteria', u'c__Gammaprotec       |
| 0   | 0    | 0  | 0   | [u'k__Bacteria', u'p__Bacteroidetes', u'c__Bacteroidia', u'   |
| 0   | 0    | 8  | 3   | [u'k__Bacteria', u'p__Actinobacteria', u'c__Actinobacteria    |
| 0   | 6    | 0  | 0   | [u'k__Bacteria', u'p__Firmicutes', u'c__Clostridia', u'o__C   |
| 0   | 0    | 0  | 0   | [u'k__Bacteria', u'p__Proteobacteria', u'c__Alphaproteoba     |
| 0   | 0    | 0  | 0   | [u'k__Bacteria', u'p__Firmicutes', u'c__Bacilli', u'o__Lactc  |
| 0   | 0    | 0  | 0   | [u'k__Bacteria', u'p__Bacteroidetes', u'c__Sphingobacteri     |
| 0   | 0    | 0  | 0   | [u'k__Bacteria', u'p__Firmicutes', u'c__Clostridia', u'o__C   |
| 0   | 0    | 0  | 0   | [u'k__Bacteria', u'p__Bacteroidetes', u'c__Bacteroidia', u'   |
| 0   | 0    | 0  | 0   | [u'k__Bacteria', u'p__Firmicutes', u'c__Bacilli', u'o__Lactc  |
| 0   | 0    | 0  | 0   | [u'k__Bacteria', u'p__Proteobacteria', u'c__Betaproteoba      |
| 0   | 0    | 0  | 0   | [u'k__Bacteria', u'p__Actinobacteria', u'c__Actinobacteria    |
| 0   | 0    | 0  | 0   | [u'k__Bacteria', u'p__Firmicutes', u'c__Clostridia', u'o__C   |
| 0   | 0    | 0  | 0   | [u'k__Bacteria', u'p__Proteobacteria', u'c__Gammaprotec       |
| 6   | 0    | 0  | 0   | [u'k__Bacteria', u'p__Proteobacteria', u'c__Gammaprotec       |
| 0   | 0    | 0  | 0   | [u'k__Bacteria', u'p__Firmicutes', u'c__Clostridia', u'o__C   |
| 0   | 0    | 0  | 0   | [u'k__Bacteria', u'p__Firmicutes', u'c__Clostridia', u'o__C   |
| 0   | 0    | 0  | 0   | [u'k__Bacteria', u'p__Firmicutes', u'c__Clostridia', u'o__C   |
| 0   | 0    | 0  | 0   | [u'k__Bacteria', u'p__Proteobacteria', u'c__Gammaprotec       |
| 0   | 0    | 0  | 0   | [u'k__Bacteria', u'p__Proteobacteria', u'c__Betaproteoba      |
| 0   | 0    | 0  | 0   | [u'k__Bacteria', u'p__Firmicutes', u'c__Clostridia', u'o__C   |
| 0   | 0    | 0  | 0   | [u'k__Bacteria', u'p__Firmicutes', u'c__Bacilli', u'o__Bacill |
| 0   | 0    | 0  | 2   | [u'k__Bacteria', u'p__Proteobacteria', u'c__Gammaprotec       |
| 0   | 0    | 0  | 0   | [u'k__Bacteria', u'p__Firmicutes', u'c__Clostridia', u'o__C   |
| 0   | 0    | 0  | 0   | [u'k__Bacteria', u'p__Firmicutes', u'c__Bacilli', u'o__Lactc  |
| 0   | 0    | 0  | 0   | [u'k__Bacteria', u'p__Firmicutes', u'c__Clostridia', u'o__C   |
| 177 | 0    | 0  | 0   | [u'k__Bacteria', u'p__Proteobacteria', u'c__Gammaprotec       |
| 0   | 0    | 0  | 0   | [u'k__Bacteria', u'p__Proteobacteria', u'c__Gammaprotec       |
| 0   | 0    | 0  | 0   | [u'k__Bacteria', u'p__Actinobacteria', u'c__Actinobacteria    |
| 0   | 0    | 0  | 0   | [u'k__Bacteria', u'p__Proteobacteria', u'c__Betaproteoba      |
| 0   | 0    | 0  | 0   | [u'k__Bacteria', u'p__Firmicutes', u'c__Clostridia', u'o__C   |
| 0   | 0    | 0  | 0   | [u'k__Bacteria', u'p__Firmicutes', u'c__Clostridia', u'o__C   |
| 0   | 0    | 0  | 0   | [u'k__Bacteria', u'p__Firmicutes', u'c__Clostridia', u'o__C   |
| 0   | 0    | 0  | 0   | [u'k__Bacteria', u'p__Firmicutes', u'c__Bacilli', u'o__Lactc  |
| 5   | 94   | 12 | 0   | [u'k__Bacteria', u'p__Proteobacteria', u'c__Gammaprotec       |
| 10  | 0    | 0  | 0   | [u'k__Bacteria', u'p__Firmicutes', u'c__Clostridia', u'o__C   |
| 0   | 0    | 0  | 0   | [u'k__Bacteria', u'p__Actinobacteria', u'c__Actinobacteria    |
| 0   | 0    | 0  | 0   | [u'k__Bacteria', u'p__Actinobacteria', u'c__Actinobacteria    |
| 0   | 0    | 0  | 0   | [u'k__Bacteria', u'p__Proteobacteria', u'c__Gammaprotec       |
| 0   | 0    | 0  | 0   | [u'k__Bacteria', u'p__Bacteroidetes', u'c__Bacteroidia', u'   |
| 0   | 0    | 0  | 0   | [u'k__Bacteria', u'p__Firmicutes', u'c__Bacilli', u'o__Lactc  |
| 0   | 0    | 0  | 0   | [u'k__Bacteria', u'p__Proteobacteria', u'c__Gammaprotec       |
| 13  | 7    | 2  | 3   | [u'k__Bacteria', u'p__Proteobacteria', u'c__Gammaprotec       |
| 0   | 0    | 0  | 0   | [u'k__Bacteria', u'p__Firmicutes', u'c__Clostridia', u'o__C   |
| 0   | 2    | 0  | 0   | [u'k__Bacteria', u'p__Firmicutes', u'c__Clostridia', u'o__C   |
| 0   | 0    | 0  | 0   | [u'k__Bacteria', u'p__Bacteroidetes', u'c__Bacteroidia', u'   |
| 0   | 0    | 0  | 0   | [u'k__Bacteria', u'p__Firmicutes', u'c__Bacilli', u'o__Lactc  |
| 0   | 0    | 0  | 0   | [u'k__Bacteria', u'p__Firmicutes', u'c__Clostridia', u'o__C   |
| 2   | 3    | 0  | 0   | [u'k__Bacteria', u'p__Proteobacteria', u'c__Gammaprotec       |
| 0   | 0    | 0  | 0   | [u'k__Bacteria', u'p__Proteobacteria', u'c__Gammaprotec       |
| 0   | 0    | 0  | 1   | [u'k__Bacteria', u'p__Firmicutes', u'c__Clostridia', u'o__C   |
| 0   | 0    | 0  | 0   | [u'k__Bacteria', u'p__Bacteroidetes', u'c__Flavobacteriia',   |
| 485 | 1172 | 45 | 2   | [u'k__Bacteria', u'p__Firmicutes', u'c__Clostridia', u'o__C   |
| 0   | 0    | 0  | 0   | [u'k__Bacteria', u'p__Firmicutes', u'c__Clostridia', u'o__C   |
| 0   | 0    | 10 | 6   | [u'k__Bacteria', u'p__Actinobacteria', u'c__Actinobacteria    |

|     |   |   |                                                                 |
|-----|---|---|-----------------------------------------------------------------|
| 0   | 0 | 0 | 0 [u'k__Bacteria', u'p__Proteobacteria', u'c__Betaproteoba      |
| 0   | 0 | 0 | 0 [u'k__Bacteria', u'p__Firmicutes', u'c__Clostridia', u'o__C   |
| 0   | 0 | 0 | 0 [u'k__Bacteria', u'p__Actinobacteria', u'c__Actinobacteria    |
| 0   | 0 | 0 | 0 [u'k__Bacteria', u'p__Bacteroidetes', u'c__Bacteroidia', u'   |
| 0   | 0 | 0 | 0 [u'k__Bacteria', u'p__Proteobacteria', u'c__Betaproteoba      |
| 1   | 0 | 0 | 1 [u'k__Bacteria', u'p__Proteobacteria', u'c__Gammaprotec       |
| 0   | 0 | 0 | 0 [u'k__Bacteria', u'p__Proteobacteria', u'c__Gammaprotec       |
| 0   | 0 | 0 | 0 [u'k__Bacteria', u'p__Proteobacteria', u'c__Alphaproteoba     |
| 0   | 0 | 0 | 0 [u'k__Bacteria', u'p__Firmicutes', u'c__Clostridia', u'o__C   |
| 0   | 0 | 2 | 0 [u'k__Bacteria', u'p__Actinobacteria', u'c__Coriobacteria'    |
| 0   | 0 | 0 | 0 [u'k__Bacteria', u'p__Actinobacteria', u'c__Coriobacteria'    |
| 0   | 0 | 0 | 0 [u'k__Bacteria', u'p__Actinobacteria', u'c__Actinobacteria    |
| 0   | 0 | 0 | 1 [u'k__Bacteria', u'p__Firmicutes', u'c__Clostridia', u'o__C   |
| 0   | 0 | 1 | 3 [u'k__Bacteria', u'p__Bacteroidetes', u'c__Bacteroidia', u'   |
| 3   | 8 | 0 | 0 [u'k__Bacteria', u'p__Proteobacteria', u'c__Gammaprotec       |
| 1   | 0 | 0 | 0 [u'k__Bacteria', u'p__Proteobacteria', u'c__Gammaprotec       |
| 0   | 0 | 0 | 0 [u'k__Bacteria', u'p__Firmicutes', u'c__Bacilli', u'o__Bacill |
| 0   | 0 | 0 | 0 [u'k__Bacteria', u'p__Firmicutes', u'c__Bacilli', u'o__Lactc  |
| 0   | 0 | 0 | 0 [u'k__Bacteria', u'p__Firmicutes', u'c__Bacilli', u'o__Lactc  |
| 1   | 0 | 0 | 0 [u'k__Bacteria', u'p__Firmicutes', u'c__Bacilli', u'o__Lactc  |
| 0   | 0 | 0 | 0 [u'k__Bacteria', u'p__Proteobacteria', u'c__Alphaproteoba     |
| 2   | 1 | 1 | 0 [u'k__Bacteria', u'p__Proteobacteria', u'c__Gammaprotec       |
| 0   | 0 | 0 | 0 [u'k__Bacteria', u'p__Firmicutes', u'c__Clostridia', u'o__C   |
| 0   | 0 | 0 | 1 [u'k__Bacteria', u'p__Proteobacteria', u'c__Gammaprotec       |
| 2   | 0 | 0 | 0 [u'k__Bacteria', u'p__Proteobacteria', u'c__Gammaprotec       |
| 0   | 0 | 0 | 0 [u'k__Bacteria', u'p__Firmicutes', u'c__Bacilli', u'o__Bacill |
| 1   | 0 | 0 | 0 [u'k__Bacteria', u'p__Firmicutes', u'c__Erysipelotrichi', u'c |
| 4   | 0 | 0 | 0 [u'k__Bacteria', u'p__Proteobacteria', u'c__Gammaprotec       |
| 0   | 0 | 0 | 0 [u'k__Bacteria', u'p__Firmicutes', u'c__Clostridia', u'o__C   |
| 0   | 0 | 0 | 0 [u'k__Bacteria', u'p__Firmicutes', u'c__Clostridia', u'o__C   |
| 0   | 0 | 0 | 0 [u'k__Bacteria', u'p__Actinobacteria', u'c__Coriobacteria'    |
| 0   | 0 | 0 | 0 [u'k__Bacteria', u'p__Firmicutes', u'c__Clostridia', u'o__C   |
| 0   | 0 | 0 | 0 [u'k__Bacteria', u'p__Firmicutes', u'c__Clostridia', u'o__C   |
| 0   | 0 | 0 | 0 [u'k__Bacteria', u'p__Firmicutes', u'c__Bacilli', u'o__Lactc  |
| 0   | 0 | 0 | 0 [u'k__Bacteria', u'p__Proteobacteria', u'c__Gammaprotec       |
| 0   | 0 | 0 | 0 [u'k__Bacteria', u'p__Actinobacteria', u'c__Actinobacteria    |
| 2   | 4 | 0 | 0 [u'k__Bacteria', u'p__Proteobacteria', u'c__Gammaprotec       |
| 0   | 0 | 1 | 1 [u'k__Bacteria', u'p__Bacteroidetes', u'c__Bacteroidia', u'   |
| 0   | 0 | 0 | 0 [u'k__Bacteria', u'p__Proteobacteria', u'c__Gammaprotec       |
| 0   | 0 | 0 | 0 [u'k__Bacteria', u'p__Bacteroidetes', u'c__Bacteroidia', u'   |
| 146 | 0 | 0 | 0 [u'k__Bacteria', u'p__Firmicutes', u'c__Clostridia', u'o__C   |
| 0   | 0 | 0 | 0 [u'k__Bacteria', u'p__Proteobacteria', u'c__Betaproteoba      |
| 0   | 0 | 0 | 0 [u'k__Bacteria', u'p__Proteobacteria', u'c__Betaproteoba      |
| 0   | 0 | 0 | 0 [u'k__Bacteria', u'p__Actinobacteria', u'c__Actinobacteria    |
| 11  | 0 | 0 | 0 [u'k__Bacteria', u'p__Proteobacteria', u'c__Epsilonproteo     |
| 0   | 0 | 0 | 0 [u'k__Bacteria', u'p__Actinobacteria', u'c__Actinobacteria    |
| 0   | 0 | 0 | 0 [u'k__Bacteria', u'p__Proteobacteria', u'c__Alphaproteoba     |
| 0   | 0 | 0 | 0 [u'k__Bacteria', u'p__Firmicutes', u'c__Clostridia', u'o__C   |
| 0   | 0 | 0 | 0 [u'k__Bacteria', u'p__Firmicutes', u'c__Clostridia', u'o__C   |
| 1   | 0 | 0 | 0 [u'k__Bacteria', u'p__Firmicutes', u'c__Clostridia', u'o__C   |
| 1   | 0 | 0 | 0 [u'k__Bacteria', u'p__Firmicutes', u'c__Bacilli', u'o__Lactc  |
| 0   | 0 | 0 | 0 [u'k__Bacteria', u'p__Firmicutes', u'c__Clostridia', u'o__C   |
| 0   | 0 | 0 | 5 [u'k__Bacteria', u'p__Firmicutes', u'c__Clostridia', u'o__C   |
| 0   | 0 | 0 | 0 [u'k__Bacteria', u'p__Firmicutes', u'c__Bacilli', u'o__Bacill |
| 107 | 0 | 0 | 0 [u'k__Bacteria', u'p__Firmicutes', u'c__Clostridia', u'o__C   |
| 6   | 0 | 0 | 4 [u'k__Bacteria', u'p__Firmicutes', u'c__Clostridia', u'o__C   |





|   |    |      |                                                                 |
|---|----|------|-----------------------------------------------------------------|
| 0 | 0  | 0    | 0 [u'k__Bacteria', u'p__Proteobacteria', u'c__Gammaprotec       |
| 0 | 0  | 0    | 0 [u'k__Bacteria', u'p__Actinobacteria', u'c__Actinobacteria    |
| 0 | 0  | 0    | 1 [u'k__Bacteria', u'p__Firmicutes', u'c__Erysipelotrichi', u'c |
| 0 | 32 | 111  | 33 [u'k__Bacteria', u'p__Actinobacteria', u'c__Coriobacteriia'  |
| 0 | 0  | 0    | 0 [u'k__Bacteria', u'p__Bacteroidetes', u'c__Bacteroidia', u'   |
| 0 | 0  | 0    | 0 [u'k__Bacteria', u'p__Firmicutes', u'c__Clostridia', u'o__C   |
| 5 | 0  | 0    | 0 [u'k__Bacteria', u'p__Firmicutes', u'c__Clostridia', u'o__C   |
| 2 | 0  | 0    | 1 [u'k__Bacteria', u'p__Firmicutes', u'c__Bacilli', u'o__Lactc  |
| 0 | 0  | 0    | 0 [u'k__Bacteria', u'p__Firmicutes', u'c__Clostridia', u'o__C   |
| 0 | 0  | 0    | 0 [u'k__Bacteria', u'p__Actinobacteria', u'c__Actinobacteria    |
| 0 | 0  | 0    | 0 [u'k__Bacteria', u'p__Actinobacteria', u'c__Actinobacteria    |
| 0 | 0  | 0    | 0 [u'k__Bacteria', u'p__Firmicutes', u'c__Clostridia', u'o__C   |
| 0 | 0  | 0    | 0 [u'k__Bacteria', u'p__Bacteroidetes', u'c__Bacteroidia', u'   |
| 0 | 0  | 0    | 0 [u'k__Bacteria', u'p__Bacteroidetes', u'c__Bacteroidia', u'   |
| 0 | 0  | 0    | 0 [u'k__Bacteria', u'p__Proteobacteria', u'c__Gammaprotec       |
| 3 | 0  | 4345 | 1516 [u'k__Bacteria', u'p__Actinobacteria', u'c__Actinobacteria |
| 0 | 0  | 0    | 0 [u'k__Bacteria', u'p__Firmicutes', u'c__Clostridia', u'o__C   |
| 0 | 0  | 0    | 0 [u'k__Bacteria', u'p__Firmicutes', u'c__Clostridia', u'o__C   |
| 0 | 0  | 0    | 0 [u'k__Bacteria', u'p__Bacteroidetes', u'c__Bacteroidia', u'   |
| 0 | 0  | 0    | 0 [u'k__Bacteria', u'p__Firmicutes', u'c__Clostridia', u'o__C   |
| 0 | 0  | 0    | 0 [u'k__Bacteria', u'p__Proteobacteria', u'c__Alphaproteoba     |
| 0 | 0  | 0    | 7 [u'k__Bacteria', u'p__Firmicutes', u'c__Clostridia', u'o__C   |
| 0 | 0  | 0    | 0 [u'k__Bacteria', u'p__Proteobacteria', u'c__Gammaprotec       |
| 2 | 4  | 0    | 0 [u'k__Bacteria', u'p__Firmicutes', u'c__Bacilli', u'o__Lactc  |
| 0 | 0  | 0    | 0 [u'k__Bacteria', u'p__Actinobacteria', u'c__Actinobacteria    |
| 3 | 0  | 0    | 0 [u'k__Bacteria', u'p__Firmicutes', u'c__Clostridia', u'o__C   |
| 0 | 0  | 0    | 0 [u'k__Bacteria', u'p__Bacteroidetes', u'c__Bacteroidia', u'   |
| 0 | 0  | 0    | 0 [u'k__Bacteria', u'p__Firmicutes', u'c__Clostridia', u'o__C   |
| 0 | 0  | 0    | 0 [u'k__Bacteria', u'p__Firmicutes', u'c__Bacilli', u'o__Bacill |
| 0 | 0  | 0    | 0 [u'k__Bacteria', u'p__Firmicutes', u'c__Clostridia', u'o__C   |
| 0 | 0  | 52   | 0 [u'k__Bacteria', u'p__Bacteroidetes', u'c__Bacteroidia', u'   |
| 0 | 0  | 0    | 0 [u'k__Bacteria', u'p__Actinobacteria', u'c__Actinobacteria    |
| 0 | 0  | 0    | 0 [u'k__Bacteria', u'p__Bacteroidetes', u'c__Bacteroidia', u'   |
| 0 | 0  | 0    | 1 [u'k__Bacteria', u'p__Firmicutes', u'c__Clostridia', u'o__C   |
| 0 | 0  | 0    | 0 [u'k__Bacteria', u'p__Firmicutes', u'c__Clostridia', u'o__C   |
| 0 | 0  | 0    | 0 [u'k__Bacteria', u'p__Firmicutes', u'c__Bacilli', u'o__Lactc  |
| 5 | 0  | 0    | 0 [u'k__Bacteria', u'p__Proteobacteria', u'c__Epsilonproteo     |
| 0 | 0  | 0    | 0 [u'k__Bacteria', u'p__Firmicutes', u'c__Bacilli', u'o__Lactc  |
| 0 | 0  | 0    | 1 [u'k__Bacteria', u'p__Firmicutes', u'c__Clostridia', u'o__C   |
| 0 | 0  | 0    | 0 [u'k__Bacteria', u'p__Actinobacteria', u'c__Actinobacteria    |
| 1 | 8  | 0    | 0 [u'k__Bacteria', u'p__Firmicutes', u'c__Clostridia', u'o__C   |
| 0 | 0  | 0    | 1 [u'k__Bacteria', u'p__Firmicutes', u'c__Clostridia', u'o__C   |
| 0 | 0  | 0    | 0 [u'k__Bacteria', u'p__Actinobacteria', u'c__Actinobacteria    |
| 0 | 0  | 0    | 3 [u'k__Bacteria', u'p__Firmicutes', u'c__Clostridia', u'o__C   |
| 3 | 2  | 0    | 0 [u'k__Bacteria', u'p__Proteobacteria', u'c__Gammaprotec       |
| 0 | 0  | 0    | 0 [u'k__Bacteria', u'p__Firmicutes', u'c__Clostridia', u'o__C   |
| 0 | 0  | 0    | 0 [u'k__Bacteria', u'p__Bacteroidetes', u'c__Bacteroidia', u'   |
| 0 | 0  | 0    | 0 [u'k__Bacteria', u'p__Actinobacteria', u'c__Actinobacteria    |
| 0 | 0  | 0    | 0 [u'k__Bacteria', u'p__Bacteroidetes', u'c__Bacteroidia', u'   |
| 0 | 0  | 0    | 2 [u'k__Bacteria', u'p__Firmicutes', u'c__Clostridia', u'o__C   |
| 0 | 0  | 0    | 0 [u'k__Bacteria', u'p__Firmicutes', u'c__Bacilli', u'o__Lactc  |
| 0 | 0  | 0    | 0 [u'k__Bacteria', u'p__Firmicutes', u'c__Bacilli', u'o__Lactc  |
| 0 | 0  | 0    | 0 [u'k__Bacteria', u'p__Firmicutes', u'c__Bacilli', u'o__Bacill |
| 3 | 0  | 0    | 0 [u'k__Bacteria', u'p__Firmicutes', u'c__Clostridia', u'o__C   |
| 0 | 0  | 0    | 0 [u'k__Bacteria', u'p__Firmicutes', u'c__Clostridia', u'o__C   |
| 0 | 0  | 0    | 0 [u'k__Bacteria', u'p__Actinobacteria', u'c__Actinobacteria    |





|   |   |   |    |                                                               |
|---|---|---|----|---------------------------------------------------------------|
| 0 | 0 | 0 | 7  | [u'k__Bacteria', u'p__Firmicutes', u'c__Clostridia', u'o__C   |
| 0 | 0 | 0 | 0  | [u'k__Bacteria', u'p__Bacteroidetes', u'c__Bacteroidia', u'   |
| 0 | 0 | 0 | 0  | [u'k__Bacteria', u'p__Proteobacteria', u'c__Gammaprotec       |
| 0 | 0 | 0 | 0  | [u'k__Bacteria', u'p__Firmicutes', u'c__Clostridia', u'o__C   |
| 0 | 0 | 0 | 0  | [u'k__Bacteria', u'p__Firmicutes', u'c__Clostridia', u'o__C   |
| 0 | 0 | 0 | 0  | [u'k__Bacteria', u'p__Firmicutes', u'c__Clostridia', u'o__C   |
| 0 | 0 | 0 | 0  | [u'k__Bacteria', u'p__Firmicutes', u'c__Clostridia', u'o__C   |
| 7 | 0 | 1 | 0  | [u'k__Bacteria', u'p__Proteobacteria', u'c__Gammaprotec       |
| 0 | 0 | 0 | 0  | [u'k__Bacteria', u'p__Proteobacteria', u'c__Alphaproteoba     |
| 0 | 0 | 0 | 0  | [u'k__Bacteria', u'p__Firmicutes', u'c__Clostridia', u'o__C   |
| 0 | 0 | 0 | 0  | [u'k__Bacteria', u'p__Firmicutes', u'c__Clostridia', u'o__C   |
| 0 | 0 | 0 | 0  | [u'k__Bacteria', u'p__Actinobacteria', u'c__Actinobacteria    |
| 0 | 0 | 0 | 0  | [u'k__Bacteria', u'p__[Thermi]', u'c__Deinococci', u'o__De    |
| 0 | 0 | 0 | 0  | [u'k__Bacteria', u'p__Proteobacteria', u'c__Alphaproteoba     |
| 0 | 0 | 0 | 83 | [u'k__Bacteria', u'p__Firmicutes', u'c__Clostridia', u'o__C   |
| 2 | 2 | 0 | 1  | [u'k__Bacteria', u'p__Proteobacteria', u'c__Gammaprotec       |
| 0 | 0 | 0 | 0  | [u'k__Bacteria', u'p__Firmicutes', u'c__Clostridia', u'o__C   |
| 0 | 0 | 0 | 0  | [u'k__Bacteria', u'p__Firmicutes', u'c__Bacilli', u'o__Lactc  |
| 0 | 0 | 0 | 0  | [u'k__Bacteria', u'p__Firmicutes', u'c__Bacilli', u'o__Lactc  |
| 2 | 0 | 0 | 0  | [u'k__Bacteria', u'p__Firmicutes', u'c__Clostridia', u'o__C   |
| 0 | 0 | 0 | 0  | [u'k__Bacteria', u'p__Proteobacteria', u'c__Gammaprotec       |
| 0 | 0 | 0 | 0  | [u'k__Bacteria', u'p__Firmicutes', u'c__Bacilli', u'o__Lactc  |
| 1 | 0 | 0 | 0  | [u'k__Bacteria', u'p__Firmicutes', u'c__Clostridia', u'o__C   |
| 0 | 0 | 0 | 0  | [u'k__Bacteria', u'p__Firmicutes', u'c__Clostridia', u'o__C   |
| 0 | 0 | 0 | 0  | [u'k__Bacteria', u'p__Bacteroidetes', u'c__Bacteroidia', u'   |
| 1 | 0 | 0 | 0  | [u'k__Bacteria', u'p__Bacteroidetes', u'c__Bacteroidia', u'   |
| 0 | 0 | 0 | 0  | [u'k__Bacteria', u'p__Firmicutes', u'c__Bacilli', u'o__Lactc  |
| 0 | 0 | 0 | 0  | [u'k__Bacteria', u'p__Firmicutes', u'c__Clostridia', u'o__C   |
| 0 | 0 | 0 | 2  | [u'k__Bacteria', u'p__Firmicutes', u'c__Clostridia', u'o__C   |
| 0 | 0 | 0 | 0  | [u'k__Bacteria', u'p__Firmicutes', u'c__Bacilli', u'o__Bacill |
| 0 | 0 | 0 | 2  | [u'k__Bacteria', u'p__Firmicutes', u'c__Clostridia', u'o__C   |
| 0 | 0 | 0 | 0  | [u'k__Bacteria', u'p__Proteobacteria', u'c__Alphaproteoba     |
| 0 | 0 | 0 | 0  | [u'k__Bacteria', u'p__Actinobacteria', u'c__Coriobacteria'    |
| 0 | 0 | 0 | 0  | [u'k__Bacteria', u'p__Firmicutes', u'c__Clostridia', u'o__C   |
| 0 | 0 | 0 | 0  | [u'k__Bacteria', u'p__Firmicutes', u'c__Clostridia', u'o__C   |
| 5 | 1 | 0 | 14 | [u'k__Bacteria', u'p__Proteobacteria', u'c__Gammaprotec       |
| 0 | 0 | 0 | 0  | [u'k__Bacteria', u'p__Firmicutes', u'c__Clostridia', u'o__C   |
| 0 | 0 | 0 | 0  | [u'k__Bacteria', u'p__Firmicutes', u'c__Clostridia', u'o__C   |
| 0 | 0 | 0 | 0  | [u'k__Bacteria', u'p__Firmicutes', u'c__Clostridia', u'o__C   |
| 0 | 0 | 0 | 0  | [u'k__Bacteria', u'p__TM7', u'c__TM7-3', u'o__CW040', u       |
| 3 | 0 | 0 | 0  | [u'k__Bacteria', u'p__Bacteroidetes', u'c__Bacteroidia', u'   |
| 0 | 0 | 0 | 0  | [u'k__Bacteria', u'p__Proteobacteria', u'c__Gammaprotec       |
| 0 | 0 | 0 | 0  | [u'k__Bacteria', u'p__Firmicutes', u'c__Bacilli', u'o__Bacill |
| 0 | 0 | 0 | 0  | [u'k__Bacteria', u'p__Firmicutes', u'c__Clostridia', u'o__C   |
| 0 | 0 | 0 | 0  | [u'k__Bacteria', u'p__Proteobacteria', u'c__Betaproteoba      |
| 0 | 0 | 0 | 0  | [u'k__Bacteria', u'p__Firmicutes', u'c__Bacilli', u'o__Lactc  |
| 0 | 0 | 0 | 0  | [u'k__Bacteria', u'p__Firmicutes', u'c__Clostridia', u'o__C   |
| 0 | 0 | 0 | 0  | [u'k__Bacteria', u'p__Firmicutes', u'c__Clostridia', u'o__C   |
| 0 | 0 | 0 | 0  | [u'k__Bacteria', u'p__Firmicutes', u'c__Clostridia', u'o__C   |
| 0 | 0 | 0 | 0  | [u'k__Bacteria', u'p__Proteobacteria', u'c__Gammaprotec       |
| 0 | 0 | 0 | 0  | [u'k__Bacteria', u'p__Firmicutes', u'c__Bacilli', u'o__Bacill |
| 0 | 0 | 0 | 0  | [u'k__Bacteria', u'p__Firmicutes', u'c__Clostridia', u'o__C   |
| 0 | 0 | 0 | 0  | [u'k__Bacteria', u'p__Firmicutes', u'c__Bacilli', u'o__Bacill |
| 0 | 1 | 0 | 0  | [u'k__Bacteria', u'p__Proteobacteria', u'c__Gammaprotec       |
| 0 | 0 | 0 | 0  | [u'k__Bacteria', u'p__Firmicutes', u'c__Bacilli', u'o__Lactc  |
| 0 | 0 | 0 | 0  | [u'k__Bacteria', u'p__Firmicutes', u'c__Clostridia', u'o__C   |

|     |   |    |                                                                 |
|-----|---|----|-----------------------------------------------------------------|
| 0   | 0 | 0  | 0 [u'k__Bacteria', u'p__Firmicutes', u'c__Bacilli', u'o__Bacill |
| 1   | 0 | 0  | 0 [u'k__Bacteria', u'p__Firmicutes', u'c__Clostridia', u'o__C   |
| 0   | 0 | 0  | 0 [u'k__Bacteria', u'p__Firmicutes', u'c__Bacilli', u'o__Lactc  |
| 0   | 0 | 0  | 2 [u'k__Bacteria', u'p__Firmicutes', u'c__Clostridia', u'o__C   |
| 0   | 0 | 0  | 0 [u'k__Bacteria', u'p__Firmicutes', u'c__Bacilli', u'o__Lactc  |
| 0   | 0 | 0  | 0 [u'k__Bacteria', u'p__Proteobacteria', u'c__Betaproteoba      |
| 0   | 0 | 0  | 0 [u'k__Bacteria', u'p__Proteobacteria', u'c__Betaproteoba      |
| 0   | 0 | 0  | 0 [u'k__Bacteria', u'p__Firmicutes', u'c__Clostridia', u'o__C   |
| 9   | 0 | 0  | 0 [u'k__Bacteria', u'p__Firmicutes', u'c__Clostridia', u'o__C   |
| 0   | 0 | 0  | 0 [u'k__Bacteria', u'p__Proteobacteria', u'c__Betaproteoba      |
| 0   | 0 | 0  | 0 [u'k__Bacteria', u'p__Firmicutes', u'c__Clostridia', u'o__C   |
| 1   | 0 | 0  | 0 [u'k__Bacteria', u'p__Proteobacteria', u'c__Gammaprotec       |
| 0   | 0 | 0  | 0 [u'k__Bacteria', u'p__Firmicutes', u'c__Clostridia', u'o__C   |
| 0   | 0 | 0  | 0 [u'k__Bacteria', u'p__Firmicutes', u'c__Clostridia', u'o__C   |
| 0   | 0 | 0  | 0 [u'k__Bacteria', u'p__Actinobacteria', u'c__Coriobacteria'    |
| 1   | 0 | 0  | 0 [u'k__Bacteria', u'p__Bacteroidetes', u'c__Bacteroidia', u'   |
| 0   | 0 | 0  | 1 [u'k__Bacteria', u'p__Firmicutes', u'c__Clostridia', u'o__C   |
| 1   | 0 | 0  | 0 [u'k__Bacteria', u'p__Proteobacteria', u'c__Gammaprotec       |
| 0   | 0 | 0  | 0 [u'k__Bacteria', u'p__Proteobacteria', u'c__Gammaprotec       |
| 0   | 0 | 0  | 0 [u'k__Bacteria', u'p__Firmicutes', u'c__Bacilli', u'o__Lactc  |
| 0   | 0 | 0  | 0 [u'k__Bacteria', u'p__Firmicutes', u'c__Clostridia', u'o__C   |
| 0   | 0 | 0  | 0 [u'k__Bacteria', u'p__Firmicutes', u'c__Bacilli', u'o__Lactc  |
| 0   | 0 | 0  | 0 [u'k__Bacteria', u'p__Proteobacteria', u'c__Gammaprotec       |
| 0   | 0 | 0  | 0 [u'k__Bacteria', u'p__Actinobacteria', u'c__Actinobacteria    |
| 0   | 0 | 0  | 0 [u'k__Bacteria', u'p__Bacteroidetes', u'c__Sphingobacteri     |
| 0   | 0 | 0  | 0 [u'k__Bacteria', u'p__Firmicutes', u'c__Clostridia', u'o__C   |
| 0   | 2 | 0  | 0 [u'k__Bacteria', u'p__Proteobacteria', u'c__Gammaprotec       |
| 0   | 0 | 0  | 0 [u'k__Bacteria', u'p__Proteobacteria', u'c__Betaproteoba      |
| 0   | 0 | 0  | 0 [u'k__Bacteria', u'p__Proteobacteria', u'c__Gammaprotec       |
| 0   | 0 | 11 | 7 [u'k__Bacteria', u'p__Actinobacteria', u'c__Actinobacteria    |
| 0   | 0 | 0  | 0 [u'k__Bacteria', u'p__Firmicutes', u'c__Bacilli', u'o__Lactc  |
| 0   | 0 | 0  | 0 [u'k__Bacteria', u'p__Proteobacteria', u'c__Betaproteoba      |
| 0   | 0 | 0  | 0 [u'k__Bacteria', u'p__Bacteroidetes', u'c__Bacteroidia', u'   |
| 0   | 0 | 0  | 0 [u'k__Bacteria', u'p__Firmicutes', u'c__Clostridia', u'o__C   |
| 0   | 0 | 0  | 0 [u'k__Bacteria', u'p__Firmicutes', u'c__Bacilli', u'o__Bacill |
| 0   | 0 | 0  | 0 [u'k__Bacteria', u'p__Firmicutes', u'c__Clostridia', u'o__C   |
| 0   | 0 | 0  | 0 [u'k__Bacteria', u'p__Proteobacteria', u'c__Betaproteoba      |
| 0   | 0 | 0  | 0 [u'k__Bacteria', u'p__Bacteroidetes', u'c__Flavobacteria',    |
| 0   | 0 | 0  | 0 [u'k__Bacteria', u'p__Firmicutes', u'c__Bacilli', u'o__Lactc  |
| 0   | 0 | 0  | 0 [u'k__Bacteria', u'p__Firmicutes', u'c__Bacilli', u'o__Lactc  |
| 0   | 0 | 0  | 29 [u'k__Bacteria', u'p__Firmicutes', u'c__Clostridia', u'o__C  |
| 0   | 0 | 0  | 0 [u'k__Bacteria', u'p__Firmicutes', u'c__Clostridia', u'o__C   |
| 2   | 2 | 2  | 0 [u'k__Bacteria', u'p__Proteobacteria', u'c__Gammaprotec       |
| 0   | 0 | 0  | 0 [u'k__Bacteria', u'p__Firmicutes', u'c__Bacilli', u'o__Lactc  |
| 0   | 0 | 0  | 0 [u'k__Bacteria', u'p__Bacteroidetes', u'c__Bacteroidia', u'   |
| 0   | 0 | 0  | 0 [u'k__Bacteria', u'p__Bacteroidetes', u'c__Bacteroidia', u'   |
| 123 | 0 | 0  | 196 [u'k__Bacteria', u'p__Firmicutes', u'c__Clostridia', u'o__C |
| 0   | 0 | 0  | 0 [u'k__Bacteria', u'p__Firmicutes', u'c__Bacilli', u'o__Bacill |
| 0   | 0 | 0  | 0 [u'k__Bacteria', u'p__Bacteroidetes', u'c__Bacteroidia', u'   |
| 0   | 0 | 0  | 0 [u'k__Bacteria', u'p__Proteobacteria', u'c__Alphaproteoba     |
| 1   | 2 | 0  | 0 [u'k__Bacteria', u'p__Firmicutes', u'c__Clostridia', u'o__C   |
| 0   | 0 | 0  | 0 [u'k__Bacteria', u'p__Proteobacteria', u'c__Alphaproteoba     |
| 0   | 0 | 0  | 0 [u'k__Bacteria', u'p__Bacteroidetes', u'c__Bacteroidia', u'   |
| 2   | 0 | 0  | 0 [u'k__Bacteria', u'p__Firmicutes', u'c__Clostridia', u'o__C   |
| 0   | 0 | 0  | 0 [u'k__Bacteria', u'p__Proteobacteria', u'c__Alphaproteoba     |
| 0   | 0 | 0  | 0 [u'k__Bacteria', u'p__Firmicutes', u'c__Bacilli', u'o__Lactc  |

|   |   |    |    |                                                                |
|---|---|----|----|----------------------------------------------------------------|
| 0 | 0 | 0  | 0  | [u'k__Bacteria', u'p__Firmicutes', u'c__Bacilli', u'o__Lactc   |
| 0 | 0 | 0  | 0  | [u'k__Bacteria', u'p__Firmicutes', u'c__Clostridia', u'o__C    |
| 0 | 0 | 0  | 2  | [u'k__Bacteria', u'p__Firmicutes', u'c__Clostridia', u'o__C    |
| 0 | 0 | 0  | 0  | [u'k__Bacteria', u'p__Proteobacteria', u'c__Betaproteoba       |
| 0 | 0 | 41 | 0  | [u'k__Bacteria', u'p__Actinobacteria', u'c__Coriobacteriia'    |
| 0 | 0 | 0  | 0  | [u'k__Bacteria', u'p__Actinobacteria', u'c__Actinobacteria     |
| 0 | 0 | 0  | 0  | [u'k__Bacteria', u'p__Proteobacteria', u'c__Gammaprotec        |
| 0 | 2 | 0  | 0  | [u'k__Bacteria', u'p__Proteobacteria', u'c__Gammaprotec        |
| 0 | 0 | 0  | 0  | [u'k__Bacteria', u'p__Firmicutes', u'c__Clostridia', u'o__C    |
| 7 | 0 | 0  | 0  | [u'k__Bacteria', u'p__Firmicutes', u'c__Clostridia', u'o__C    |
| 0 | 0 | 0  | 0  | [u'k__Bacteria', u'p__Actinobacteria', u'c__Coriobacteriia'    |
| 1 | 0 | 0  | 0  | [u'k__Bacteria', u'p__Proteobacteria', u'c__Gammaprotec        |
| 0 | 0 | 0  | 0  | [u'k__Bacteria', u'p__Firmicutes', u'c__Clostridia', u'o__C    |
| 0 | 0 | 0  | 0  | [u'k__Bacteria', u'p__Proteobacteria', u'c__Betaproteoba       |
| 0 | 0 | 0  | 0  | [u'k__Bacteria', u'p__Proteobacteria', u'c__Gammaprotec        |
| 0 | 0 | 0  | 0  | [u'k__Bacteria', u'p__Firmicutes', u'c__Clostridia', u'o__C    |
| 0 | 1 | 0  | 0  | [u'k__Bacteria', u'p__Firmicutes', u'c__Bacilli', u'o__Lactc   |
| 0 | 0 | 0  | 0  | [u'k__Bacteria', u'p__Proteobacteria', u'c__Gammaprotec        |
| 0 | 0 | 0  | 0  | [u'k__Bacteria', u'p__Firmicutes', u'c__Clostridia', u'o__C    |
| 0 | 0 | 0  | 0  | [u'k__Bacteria', u'p__Bacteroidetes', u'c__Bacteroidia', u'    |
| 1 | 1 | 0  | 0  | [u'k__Bacteria', u'p__Firmicutes', u'c__Bacilli', u'o__Lactc   |
| 0 | 0 | 0  | 0  | [u'k__Bacteria', u'p__Firmicutes', u'c__Clostridia', u'o__C    |
| 0 | 2 | 0  | 0  | [u'k__Bacteria', u'p__Firmicutes', u'c__Clostridia', u'o__C    |
| 1 | 0 | 0  | 0  | [u'k__Bacteria', u'p__Firmicutes', u'c__Bacilli', u'o__Lactc   |
| 4 | 0 | 0  | 0  | [u'k__Bacteria', u'p__Firmicutes', u'c__Clostridia', u'o__C    |
| 0 | 0 | 0  | 0  | [u'k__Bacteria', u'p__Proteobacteria', u'c__Gammaprotec        |
| 0 | 0 | 0  | 0  | [u'k__Bacteria', u'p__Firmicutes', u'c__Clostridia', u'o__C    |
| 0 | 0 | 0  | 0  | [u'k__Bacteria', u'p__Firmicutes', u'c__Clostridia', u'o__C    |
| 0 | 0 | 0  | 1  | [u'k__Bacteria', u'p__Firmicutes', u'c__Clostridia', u'o__C    |
| 0 | 0 | 0  | 0  | [u'k__Bacteria', u'p__Bacteroidetes', u'c__Bacteroidia', u'    |
| 0 | 0 | 0  | 0  | [u'k__Bacteria', u'p__Proteobacteria', u'c__Gammaprotec        |
| 0 | 0 | 0  | 0  | [u'k__Bacteria', u'p__Bacteroidetes', u'c__Cytophagia', u'     |
| 0 | 0 | 0  | 0  | [u'k__Bacteria', u'p__Bacteroidetes', u'c__Bacteroidia', u'    |
| 0 | 0 | 0  | 0  | [u'k__Bacteria', u'p__Actinobacteria', u'c__Actinobacteria     |
| 0 | 0 | 0  | 0  | [u'k__Bacteria', u'p__Proteobacteria', u'c__Alphaproteoba      |
| 0 | 0 | 0  | 3  | [u'k__Bacteria', u'p__Firmicutes', u'c__Clostridia', u'o__C    |
| 0 | 0 | 0  | 0  | [u'k__Bacteria', u'p__Firmicutes', u'c__Clostridia', u'o__C    |
| 0 | 0 | 0  | 0  | [u'k__Bacteria', u'p__Bacteroidetes', u'c__Bacteroidia', u'    |
| 0 | 0 | 0  | 0  | [u'k__Bacteria', u'p__Bacteroidetes', u'c__Bacteroidia', u'    |
| 0 | 0 | 0  | 0  | [u'k__Bacteria', u'p__Firmicutes', u'c__Bacilli', u'o__Bacill  |
| 0 | 0 | 0  | 0  | [u'k__Bacteria', u'p__Firmicutes', u'c__Bacilli', u'o__Bacill  |
| 0 | 0 | 0  | 0  | [u'k__Bacteria', u'p__Firmicutes', u'c__Bacilli', u'o__Lactc   |
| 0 | 0 | 92 | 55 | [u'k__Bacteria', u'p__Actinobacteria', u'c__Actinobacteria     |
| 0 | 0 | 0  | 0  | [u'k__Bacteria', u'p__Firmicutes', u'c__Clostridia', u'o__C    |
| 0 | 0 | 0  | 0  | [u'k__Bacteria', u'p__Firmicutes', u'c__Clostridia', u'o__C    |
| 0 | 0 | 0  | 0  | [u'k__Bacteria', u'p__Proteobacteria', u'c__Gammaprotec        |
| 0 | 0 | 74 | 33 | [u'k__Bacteria', u'p__Actinobacteria', u'c__Actinobacteria     |
| 0 | 0 | 1  | 0  | [u'k__Bacteria', u'p__Bacteroidetes', u'c__Bacteroidia', u'    |
| 0 | 0 | 0  | 0  | [u'k__Bacteria', u'p__Firmicutes', u'c__Clostridia', u'o__C    |
| 0 | 0 | 0  | 0  | [u'k__Bacteria', u'p__Verrucomicrobia', u'c__Verrucomicr       |
| 0 | 0 | 0  | 0  | [u'k__Bacteria', u'p__Firmicutes', u'c__Bacilli', u'o__Lactc   |
| 0 | 0 | 0  | 0  | [u'k__Bacteria', u'p__Proteobacteria', u'c__Alphaproteoba      |
| 0 | 0 | 0  | 0  | [u'k__Bacteria', u'p__Firmicutes', u'c__Clostridia', u'o__C    |
| 0 | 0 | 0  | 0  | [u'k__Bacteria', u'p__Bacteroidetes', u'c__Bacteroidia', u'    |
| 0 | 0 | 0  | 0  | [u'k__Bacteria', u'p__Proteobacteria', u'c__Gammaprotec        |
| 0 | 0 | 0  | 0  | [u'k__Bacteria', u'p__SR1', u'c__', u'o__', u'f__', u'g__', u' |



|   |    |    |                                                                  |
|---|----|----|------------------------------------------------------------------|
| 1 | 0  | 0  | 0 [u'k__Bacteria', u'p__Firmicutes', u'c__Bacilli', u'o__Lactc   |
| 4 | 0  | 0  | 0 [u'k__Bacteria', u'p__Verrucomicrobia', u'c__Verrucomicr       |
| 2 | 4  | 0  | 0 [u'k__Bacteria', u'p__Firmicutes', u'c__Bacilli', u'o__Lactc   |
| 0 | 0  | 0  | 2 [u'k__Bacteria', u'p__Firmicutes', u'c__Clostridia', u'o__C    |
| 0 | 0  | 1  | 0 [u'k__Bacteria', u'p__Bacteroidetes', u'c__Bacteroidia', u'    |
| 0 | 0  | 0  | 64 [u'k__Bacteria', u'p__Firmicutes', u'c__Erysipelotrichi', u'c |
| 0 | 0  | 0  | 0 [u'k__Bacteria', u'p__Actinobacteria', u'c__Actinobacteria     |
| 0 | 0  | 0  | 0 [u'k__Bacteria', u'p__Firmicutes', u'c__Clostridia', u'o__C    |
| 0 | 0  | 0  | 0 [u'k__Bacteria', u'p__Firmicutes', u'c__Clostridia', u'o__C    |
| 0 | 0  | 0  | 0 [u'k__Bacteria', u'p__Actinobacteria', u'c__Coriobacteria'     |
| 1 | 0  | 5  | 0 [u'k__Bacteria', u'p__Firmicutes', u'c__Bacilli', u'o__Bacill  |
| 0 | 0  | 0  | 0 [u'k__Bacteria', u'p__Firmicutes', u'c__Bacilli', u'o__Lactc   |
| 0 | 0  | 0  | 0 [u'k__Bacteria', u'p__Firmicutes', u'c__Clostridia', u'o__C    |
| 0 | 0  | 0  | 0 [u'k__Bacteria', u'p__Firmicutes', u'c__Clostridia', u'o__C    |
| 0 | 0  | 0  | 0 [u'k__Bacteria', u'p__Firmicutes', u'c__Clostridia', u'o__C    |
| 0 | 0  | 0  | 0 [u'k__Bacteria', u'p__Firmicutes', u'c__Bacilli', u'o__Bacill  |
| 0 | 0  | 0  | 0 [u'k__Bacteria', u'p__Firmicutes', u'c__Clostridia', u'o__C    |
| 0 | 0  | 0  | 0 [u'k__Bacteria', u'p__Firmicutes', u'c__Bacilli', u'o__Lactc   |
| 0 | 0  | 0  | 0 [u'k__Bacteria', u'p__Firmicutes', u'c__Bacilli', u'o__Lactc   |
| 0 | 0  | 0  | 0 [u'k__Bacteria', u'p__Bacteroidetes', u'c__Bacteroidia', u'    |
| 0 | 0  | 0  | 0 [u'k__Bacteria', u'p__Firmicutes', u'c__Clostridia', u'o__C    |
| 0 | 0  | 0  | 0 [u'k__Bacteria', u'p__Firmicutes', u'c__Bacilli', u'o__Lactc   |
| 1 | 2  | 0  | 0 [u'k__Bacteria', u'p__Proteobacteria', u'c__Gammaprotec        |
| 1 | 0  | 0  | 0 [u'k__Bacteria', u'p__Firmicutes', u'c__Clostridia', u'o__C    |
| 0 | 0  | 0  | 0 [u'k__Bacteria', u'p__Firmicutes', u'c__Bacilli', u'o__Lactc   |
| 0 | 0  | 0  | 0 [u'k__Bacteria', u'p__Firmicutes', u'c__Clostridia', u'o__C    |
| 0 | 0  | 0  | 0 [u'k__Bacteria', u'p__Actinobacteria', u'c__Actinobacteria     |
| 0 | 0  | 1  | 0 [u'k__Bacteria', u'p__Actinobacteria', u'c__Actinobacteria     |
| 0 | 0  | 0  | 0 [u'k__Bacteria', u'p__Bacteroidetes', u'c__Bacteroidia', u'    |
| 0 | 0  | 0  | 0 [u'k__Bacteria', u'p__Proteobacteria', u'c__Gammaprotec        |
| 0 | 0  | 0  | 0 [u'k__Bacteria', u'p__Firmicutes', u'c__Clostridia', u'o__C    |
| 0 | 0  | 0  | 0 [u'k__Bacteria', u'p__Firmicutes', u'c__Bacilli', u'o__Lactc   |
| 0 | 0  | 0  | 0 [u'k__Bacteria', u'p__Bacteroidetes', u'c__Bacteroidia', u'    |
| 1 | 2  | 0  | 0 [u'k__Bacteria', u'p__Proteobacteria', u'c__Gammaprotec        |
| 0 | 0  | 0  | 6 [u'k__Bacteria', u'p__Firmicutes', u'c__Clostridia', u'o__C    |
| 8 | 0  | 0  | 0 [u'k__Bacteria', u'p__Firmicutes', u'c__Bacilli', u'o__Bacill  |
| 0 | 0  | 0  | 0 [u'k__Bacteria', u'p__Firmicutes', u'c__Bacilli', u'o__Lactc   |
| 0 | 0  | 0  | 0 [u'k__Bacteria', u'p__Firmicutes', u'c__Clostridia', u'o__C    |
| 0 | 0  | 0  | 0 [u'k__Bacteria', u'p__Firmicutes', u'c__Bacilli', u'o__Lactc   |
| 1 | 0  | 0  | 0 [u'k__Bacteria', u'p__Firmicutes', u'c__Bacilli', u'o__Lactc   |
| 0 | 0  | 1  | 1 [u'k__Bacteria', u'p__Actinobacteria', u'c__Actinobacteria     |
| 0 | 0  | 0  | 0 [u'k__Bacteria', u'p__Proteobacteria', u'c__Gammaprotec        |
| 0 | 10 | 0  | 0 [u'k__Bacteria', u'p__Actinobacteria', u'c__Actinobacteria     |
| 0 | 0  | 0  | 0 [u'k__Bacteria', u'p__Bacteroidetes', u'c__Bacteroidia', u'    |
| 0 | 0  | 0  | 0 [u'k__Bacteria', u'p__Firmicutes', u'c__Clostridia', u'o__C    |
| 0 | 0  | 0  | 0 [u'k__Bacteria', u'p__Firmicutes', u'c__Bacilli', u'o__Bacill  |
| 0 | 0  | 0  | 0 [u'k__Bacteria', u'p__Firmicutes', u'c__Clostridia', u'o__C    |
| 0 | 0  | 0  | 0 [u'k__Bacteria', u'p__Proteobacteria', u'c__Gammaprotec        |
| 0 | 0  | 0  | 0 [u'k__Bacteria', u'p__Firmicutes', u'c__Bacilli', u'o__Bacill  |
| 0 | 0  | 0  | 0 [u'k__Bacteria', u'p__Proteobacteria', u'c__Betaproteoba       |
| 0 | 0  | 0  | 0 [u'k__Bacteria', u'p__Actinobacteria', u'c__Actinobacteria     |
| 3 | 5  | 0  | 0 [u'k__Bacteria', u'p__Firmicutes', u'c__Bacilli', u'o__Lactc   |
| 0 | 0  | 0  | 0 [u'k__Bacteria', u'p__Proteobacteria', u'c__Betaproteoba       |
| 0 | 0  | 0  | 0 [u'k__Bacteria', u'p__Bacteroidetes', u'c__Bacteroidia', u'    |
| 0 | 0  | 11 | 0 [u'k__Bacteria', u'p__Bacteroidetes', u'c__Bacteroidia', u'    |
| 0 | 0  | 0  | 0 [u'k__Bacteria', u'p__Bacteroidetes', u'c__Bacteroidia', u'    |

|    |    |   |                                                                 |
|----|----|---|-----------------------------------------------------------------|
| 0  | 0  | 0 | 4 [u'k__Bacteria', u'p__Bacteroidetes', u'c__Bacteroidia', u'   |
| 0  | 0  | 0 | 0 [u'k__Bacteria', u'p__Bacteroidetes', u'c__Flavobacteriia',   |
| 0  | 2  | 0 | 0 [u'k__Bacteria', u'p__Firmicutes', u'c__Clostridia', u'o__C   |
| 0  | 0  | 0 | 0 [u'k__Bacteria', u'p__Firmicutes', u'c__Clostridia', u'o__C   |
| 0  | 0  | 0 | 0 [u'k__Bacteria', u'p__Proteobacteria', u'c__Gammaprotec       |
| 0  | 0  | 0 | 0 [u'k__Bacteria', u'p__Proteobacteria', u'c__Gammaprotec       |
| 0  | 0  | 0 | 0 [u'k__Bacteria', u'p__Actinobacteria', u'c__Actinobacteria    |
| 0  | 0  | 0 | 0 [u'k__Bacteria', u'p__Bacteroidetes', u'c__Bacteroidia', u'   |
| 0  | 0  | 0 | 0 [u'k__Bacteria', u'p__Firmicutes', u'c__Bacilli', u'o__Lactc  |
| 0  | 0  | 0 | 0 [u'k__Bacteria', u'p__Firmicutes', u'c__Bacilli', u'o__Bacill |
| 8  | 0  | 0 | 0 [u'k__Bacteria', u'p__Firmicutes', u'c__Clostridia', u'o__C   |
| 0  | 0  | 0 | 0 [u'k__Bacteria', u'p__Firmicutes', u'c__Bacilli', u'o__Lactc  |
| 0  | 0  | 0 | 0 [u'k__Bacteria', u'p__Bacteroidetes', u'c__Bacteroidia', u'   |
| 0  | 0  | 0 | 0 [u'k__Bacteria', u'p__Firmicutes', u'c__Clostridia', u'o__C   |
| 0  | 0  | 0 | 0 [u'k__Bacteria', u'p__Proteobacteria', u'c__Gammaprotec       |
| 1  | 0  | 0 | 0 [u'k__Bacteria', u'p__Firmicutes', u'c__Clostridia', u'o__C   |
| 0  | 0  | 0 | 0 [u'k__Bacteria', u'p__Bacteroidetes', u'c__Bacteroidia', u'   |
| 0  | 0  | 0 | 6 [u'k__Bacteria', u'p__Firmicutes', u'c__Clostridia', u'o__C   |
| 0  | 0  | 0 | 0 [u'k__Bacteria', u'p__Firmicutes', u'c__Clostridia', u'o__C   |
| 0  | 0  | 0 | 0 [u'k__Bacteria', u'p__Firmicutes', u'c__Bacilli', u'o__Lactc  |
| 0  | 0  | 0 | 0 [u'k__Bacteria', u'p__Firmicutes', u'c__Clostridia', u'o__C   |
| 0  | 0  | 0 | 0 [u'k__Bacteria', u'p__Actinobacteria', u'c__Actinobacteria    |
| 0  | 0  | 0 | 0 [u'k__Bacteria', u'p__Proteobacteria', u'c__Betaproteoba      |
| 0  | 0  | 1 | 426 [u'k__Bacteria', u'p__Bacteroidetes', u'c__Bacteroidia', u' |
| 0  | 0  | 0 | 0 [u'k__Bacteria', u'p__Firmicutes', u'c__Bacilli', u'o__Lactc  |
| 0  | 0  | 0 | 0 [u'k__Bacteria', u'p__Firmicutes', u'c__Clostridia', u'o__C   |
| 0  | 0  | 0 | 0 [u'k__Bacteria', u'p__Proteobacteria', u'c__Betaproteoba      |
| 0  | 0  | 0 | 0 [u'k__Bacteria', u'p__Firmicutes', u'c__Bacilli', u'o__Lactc  |
| 0  | 0  | 0 | 0 [u'k__Bacteria', u'p__Firmicutes', u'c__Clostridia', u'o__C   |
| 0  | 0  | 0 | 0 [u'k__Bacteria', u'p__Firmicutes', u'c__Bacilli', u'o__Lactc  |
| 1  | 0  | 0 | 0 [u'k__Bacteria', u'p__Firmicutes', u'c__Bacilli', u'o__Lactc  |
| 0  | 0  | 0 | 0 [u'k__Bacteria', u'p__Firmicutes', u'c__Clostridia', u'o__C   |
| 0  | 0  | 0 | 0 [u'k__Bacteria', u'p__Actinobacteria', u'c__Actinobacteria    |
| 0  | 0  | 0 | 0 [u'k__Bacteria', u'p__Bacteroidetes', u'c__Bacteroidia', u'   |
| 0  | 0  | 0 | 0 [u'k__Bacteria', u'p__Actinobacteria', u'c__Actinobacteria    |
| 14 | 10 | 0 | 3 [u'k__Bacteria', u'p__Proteobacteria', u'c__Gammaprotec       |
| 0  | 0  | 0 | 0 [u'k__Bacteria', u'p__Firmicutes', u'c__Bacilli', u'o__Bacill |
| 0  | 0  | 2 | 0 [u'k__Bacteria', u'p__Bacteroidetes', u'c__Bacteroidia', u'   |
| 0  | 0  | 0 | 0 [u'k__Bacteria', u'p__Bacteroidetes', u'c__Bacteroidia', u'   |
| 0  | 0  | 0 | 0 [u'k__Bacteria', u'p__Firmicutes', u'c__Bacilli', u'o__Lactc  |
| 0  | 0  | 0 | 0 [u'k__Bacteria', u'p__Firmicutes', u'c__Bacilli', u'o__Lactc  |
| 0  | 0  | 0 | 0 [u'k__Bacteria', u'p__Bacteroidetes', u'c__', u'o__', u'f__', |
| 0  | 0  | 0 | 0 [u'k__Bacteria', u'p__Firmicutes', u'c__Clostridia', u'o__C   |
| 0  | 0  | 0 | 0 [u'k__Bacteria', u'p__Bacteroidetes', u'c__Bacteroidia', u'   |
| 0  | 0  | 0 | 0 [u'k__Bacteria', u'p__Firmicutes', u'c__Bacilli', u'o__Lactc  |
| 1  | 2  | 0 | 0 [u'k__Bacteria', u'p__Firmicutes', u'c__Clostridia', u'o__C   |
| 0  | 0  | 0 | 0 [u'k__Bacteria', u'p__Firmicutes', u'c__Clostridia', u'o__C   |
| 0  | 0  | 0 | 0 [u'k__Bacteria', u'p__WPS-2', u'c__', u'o__', u'f__', u'g__', |
| 1  | 1  | 0 | 0 [u'k__Bacteria', u'p__Proteobacteria', u'c__Gammaprotec       |
| 0  | 0  | 0 | 0 [u'k__Bacteria', u'p__Bacteroidetes', u'c__Bacteroidia', u'   |
| 0  | 0  | 8 | 1 [u'k__Bacteria', u'p__Actinobacteria', u'c__Actinobacteria    |
| 0  | 0  | 0 | 0 [u'k__Bacteria', u'p__Firmicutes', u'c__Bacilli', u'o__Bacill |
| 0  | 0  | 0 | 0 [u'k__Bacteria', u'p__Firmicutes', u'c__Bacilli', u'o__Lactc  |
| 0  | 0  | 0 | 0 [u'k__Bacteria', u'p__Proteobacteria', u'c__Alphaproteoba     |
| 83 | 0  | 0 | 0 [u'k__Bacteria', u'p__Fusobacteria', u'c__Fusobacteriia', u'  |
| 0  | 0  | 0 | 0 [u'k__Bacteria', u'p__Actinobacteria', u'c__Actinobacteria    |





|   |     |     |                                                                 |
|---|-----|-----|-----------------------------------------------------------------|
| 0 | 0   | 0   | 0 [u'k__Bacteria', u'p__Firmicutes', u'c__Clostridia', u'o__C   |
| 0 | 0   | 0   | 0 [u'k__Bacteria', u'p__Proteobacteria', u'c__Betaproteoba      |
| 0 | 0   | 0   | 0 [u'k__Bacteria', u'p__Actinobacteria', u'c__Actinobacteria    |
| 0 | 0   | 0   | 0 [u'k__Bacteria', u'p__Firmicutes', u'c__Bacilli', u'o__Gem    |
| 2 | 75  | 0   | 0 [u'k__Bacteria', u'p__Firmicutes', u'c__Clostridia', u'o__C   |
| 0 | 0   | 0   | 0 [u'k__Bacteria', u'p__Firmicutes', u'c__Clostridia', u'o__C   |
| 0 | 0   | 0   | 0 [u'k__Bacteria', u'p__Firmicutes', u'c__Clostridia', u'o__C   |
| 0 | 0   | 0   | 0 [u'k__Bacteria', u'p__Firmicutes', u'c__Clostridia', u'o__C   |
| 0 | 0   | 0   | 0 [u'k__Bacteria', u'p__Firmicutes', u'c__Clostridia', u'o__C   |
| 0 | 0   | 0   | 0 [u'k__Bacteria', u'p__Firmicutes', u'c__Clostridia', u'o__C   |
| 0 | 0   | 0   | 0 [u'k__Bacteria', u'p__Actinobacteria', u'c__Actinobacteria    |
| 1 | 0   | 155 | 16 [u'k__Bacteria', u'p__Actinobacteria', u'c__Actinobacteria   |
| 0 | 0   | 0   | 0 [u'k__Bacteria', u'p__Firmicutes', u'c__Erysipelotrichi', u'c |
| 1 | 0   | 0   | 0 [u'k__Bacteria', u'p__Firmicutes', u'c__Bacilli', u'o__Lactc  |
| 0 | 0   | 0   | 0 [u'k__Bacteria', u'p__Bacteroidetes', u'c__Bacteroidia', u'   |
| 0 | 0   | 0   | 0 [u'k__Bacteria', u'p__Proteobacteria', u'c__Gammaprotec       |
| 0 | 2   | 0   | 0 [u'k__Bacteria', u'p__Firmicutes', u'c__Clostridia', u'o__C   |
| 0 | 0   | 0   | 2 [u'k__Bacteria', u'p__Firmicutes', u'c__Clostridia', u'o__C   |
| 0 | 0   | 0   | 2 [u'k__Bacteria', u'p__Bacteroidetes', u'c__Bacteroidia', u'   |
| 0 | 1   | 0   | 1 [u'k__Bacteria', u'p__Proteobacteria', u'c__Gammaprotec       |
| 0 | 0   | 0   | 0 [u'k__Bacteria', u'p__Bacteroidetes', u'c__Bacteroidia', u'   |
| 0 | 0   | 0   | 0 [u'k__Bacteria', u'p__Firmicutes', u'c__Bacilli', u'o__Lactc  |
| 0 | 0   | 0   | 0 [u'k__Bacteria', u'p__Firmicutes', u'c__Bacilli', u'o__Lactc  |
| 0 | 0   | 0   | 0 [u'k__Bacteria', u'p__Firmicutes', u'c__Clostridia', u'o__C   |
| 0 | 0   | 0   | 0 [u'k__Bacteria', u'p__Firmicutes', u'c__Clostridia', u'o__C   |
| 0 | 0   | 0   | 0 [u'k__Bacteria', u'p__Firmicutes', u'c__Clostridia', u'o__C   |
| 0 | 0   | 0   | 0 [u'k__Bacteria', u'p__Firmicutes', u'c__Clostridia', u'o__C   |
| 0 | 0   | 0   | 0 [u'k__Bacteria', u'p__Firmicutes', u'c__Clostridia', u'o__C   |
| 0 | 0   | 0   | 0 [u'k__Bacteria', u'p__Cyanobacteria', u'c__Chloroplast', u    |
| 0 | 0   | 0   | 0 [u'k__Bacteria', u'p__Proteobacteria', u'c__Gammaprotec       |
| 0 | 0   | 0   | 0 [u'k__Bacteria', u'p__Proteobacteria', u'c__Alphaproteoba     |
| 7 | 278 | 0   | 3 [u'k__Bacteria', u'p__Proteobacteria', u'c__Gammaprotec       |
| 0 | 0   | 34  | 10 [u'k__Bacteria', u'p__Actinobacteria', u'c__Actinobacteria   |
| 5 | 0   | 0   | 0 [u'k__Bacteria', u'p__Firmicutes', u'c__Bacilli', u'o__Lactc  |
| 0 | 0   | 0   | 0 [u'k__Bacteria', u'p__Firmicutes', u'c__Clostridia', u'o__C   |
| 0 | 0   | 0   | 0 [u'k__Bacteria', u'p__Proteobacteria', u'c__Alphaproteoba     |
| 0 | 0   | 0   | 0 [u'k__Bacteria', u'p__Proteobacteria', u'c__Gammaprotec       |
| 0 | 0   | 0   | 0 [u'k__Bacteria', u'p__Firmicutes', u'c__Bacilli', u'o__Lactc  |
| 0 | 0   | 0   | 0 [u'k__Bacteria', u'p__Firmicutes', u'c__Bacilli', u'o__Lactc  |
| 0 | 0   | 0   | 0 [u'k__Bacteria', u'p__Actinobacteria', u'c__Coriobacteriia'   |
| 0 | 0   | 0   | 0 [u'k__Bacteria', u'p__Firmicutes', u'c__Clostridia', u'o__C   |
| 0 | 0   | 0   | 0 [u'k__Bacteria', u'p__Firmicutes', u'c__Clostridia', u'o__C   |
| 0 | 0   | 0   | 0 [u'k__Bacteria', u'p__Actinobacteria', u'c__Actinobacteria    |
| 0 | 0   | 0   | 0 [u'k__Bacteria', u'p__Firmicutes', u'c__Bacilli', u'o__Gem    |
| 0 | 0   | 0   | 0 [u'k__Bacteria', u'p__Proteobacteria', u'c__Alphaproteoba     |
| 0 | 0   | 0   | 0 [u'k__Bacteria', u'p__Proteobacteria', u'c__Gammaprotec       |
| 0 | 0   | 0   | 0 [u'k__Bacteria', u'p__Firmicutes', u'c__Clostridia', u'o__C   |
| 0 | 0   | 0   | 0 [u'k__Bacteria', u'p__Firmicutes', u'c__Bacilli', u'o__Lactc  |
| 0 | 0   | 0   | 0 [u'k__Bacteria', u'p__Firmicutes', u'c__Clostridia', u'o__C   |
| 0 | 0   | 0   | 0 [u'k__Bacteria', u'p__Firmicutes', u'c__Clostridia', u'o__C   |
| 2 | 2   | 1   | 1 [u'k__Bacteria', u'p__Proteobacteria', u'c__Gammaprotec       |
| 0 | 0   | 0   | 1 [u'k__Bacteria', u'p__Firmicutes', u'c__Clostridia', u'o__C   |
| 0 | 0   | 0   | 0 [u'k__Bacteria', u'p__Bacteroidetes', u'c__Bacteroidia', u'   |
| 0 | 0   | 0   | 0 [u'k__Bacteria', u'p__Firmicutes', u'c__Clostridia', u'o__C   |
| 0 | 0   | 0   | 0 [u'k__Bacteria', u'p__Proteobacteria', u'c__Betaproteoba      |
| 0 | 0   | 0   | 0 [u'k__Bacteria', u'p__Firmicutes', u'c__Clostridia', u'o__C   |

|     |     |     |                                                                  |
|-----|-----|-----|------------------------------------------------------------------|
| 0   | 0   | 0   | 0 [u'k__Bacteria', u'p__Bacteroidetes', u'c__Bacteroidia', u'    |
| 0   | 0   | 0   | 0 [u'k__Bacteria', u'p__Proteobacteria', u'c__Gammaprotec        |
| 0   | 0   | 0   | 0 [u'k__Bacteria', u'p__Firmicutes', u'c__Clostridia', u'o__C    |
| 0   | 0   | 0   | 0 [u'k__Bacteria', u'p__Bacteroidetes', u'c__Flavobacteriia',    |
| 1   | 0   | 187 | 1540 [u'k__Bacteria', u'p__Bacteroidetes', u'c__Bacteroidia', u' |
| 0   | 0   | 0   | 0 [u'k__Bacteria', u'p__Firmicutes', u'c__Clostridia', u'o__C    |
| 0   | 0   | 0   | 0 [u'k__Bacteria', u'p__Firmicutes', u'c__Clostridia', u'o__C    |
| 0   | 0   | 0   | 0 [u'k__Bacteria', u'p__Bacteroidetes', u'c__Bacteroidia', u'    |
| 0   | 0   | 0   | 0 [u'k__Bacteria', u'p__Firmicutes', u'c__Bacilli', u'o__Lactc   |
| 0   | 0   | 0   | 0 [u'k__Bacteria', u'p__Firmicutes', u'c__Clostridia', u'o__C    |
| 0   | 0   | 0   | 0 [u'k__Bacteria', u'p__Firmicutes', u'c__Bacilli', u'o__Bacill  |
| 0   | 0   | 0   | 0 [u'k__Bacteria', u'p__Proteobacteria', u'c__Gammaprotec        |
| 0   | 1   | 0   | 0 [u'k__Bacteria', u'p__Proteobacteria', u'c__Gammaprotec        |
| 0   | 0   | 0   | 0 [u'k__Bacteria', u'p__Firmicutes', u'c__Bacilli', u'o__Lactc   |
| 0   | 0   | 0   | 0 [u'k__Bacteria', u'p__Proteobacteria', u'c__Alphaproteoba      |
| 0   | 0   | 0   | 0 [u'k__Bacteria', u'p__Firmicutes', u'c__Bacilli', u'o__Gem     |
| 0   | 0   | 0   | 0 [u'k__Bacteria', u'p__Bacteroidetes', u'c__Bacteroidia', u'    |
| 0   | 0   | 0   | 0 [u'k__Bacteria', u'p__Firmicutes', u'c__Bacilli', u'o__Bacill  |
| 0   | 0   | 0   | 0 [u'k__Bacteria', u'p__Actinobacteria', u'c__Actinobacteria     |
| 0   | 0   | 0   | 0 [u'k__Bacteria', u'p__Bacteroidetes', u'c__Bacteroidia', u'    |
| 0   | 0   | 0   | 0 [u'k__Bacteria', u'p__Firmicutes', u'c__Clostridia', u'o__C    |
| 0   | 0   | 0   | 0 [u'k__Bacteria', u'p__Proteobacteria', u'c__Alphaproteoba      |
| 0   | 1   | 0   | 0 [u'k__Bacteria', u'p__Firmicutes', u'c__Bacilli', u'o__Lactc   |
| 1   | 1   | 0   | 0 [u'k__Bacteria', u'p__Proteobacteria', u'c__Gammaprotec        |
| 0   | 0   | 0   | 0 [u'k__Bacteria', u'p__Proteobacteria', u'c__Gammaprotec        |
| 0   | 0   | 0   | 0 [u'k__Bacteria', u'p__Proteobacteria', u'c__Alphaproteoba      |
| 0   | 0   | 0   | 1 [u'k__Bacteria', u'p__Firmicutes', u'c__Clostridia', u'o__C    |
| 0   | 0   | 0   | 0 [u'k__Bacteria', u'p__Firmicutes', u'c__Clostridia', u'o__C    |
| 0   | 0   | 0   | 0 [u'k__Bacteria', u'p__Actinobacteria', u'c__Actinobacteria     |
| 0   | 0   | 0   | 0 [u'k__Bacteria', u'p__Proteobacteria', u'c__Gammaprotec        |
| 0   | 0   | 0   | 0 [u'k__Bacteria', u'p__Proteobacteria', u'c__Betaproteoba       |
| 0   | 0   | 0   | 0 [u'k__Bacteria', u'p__Actinobacteria', u'c__Actinobacteria     |
| 0   | 0   | 0   | 0 [u'k__Bacteria', u'p__Firmicutes', u'c__Bacilli', u'o__Lactc   |
| 0   | 0   | 0   | 0 [u'k__Bacteria', u'p__Firmicutes', u'c__Bacilli', u'o__Bacill  |
| 0   | 3   | 0   | 0 [u'k__Bacteria', u'p__Firmicutes', u'c__Clostridia', u'o__C    |
| 0   | 0   | 0   | 0 [u'k__Bacteria', u'p__Firmicutes', u'c__Bacilli', u'o__Bacill  |
| 0   | 0   | 0   | 0 [u'k__Bacteria', u'p__Proteobacteria', u'c__Gammaprotec        |
| 0   | 0   | 0   | 0 [u'k__Bacteria', u'p__Firmicutes', u'c__Bacilli', u'o__Bacill  |
| 0   | 1   | 0   | 0 [u'k__Bacteria', u'p__Actinobacteria', u'c__Actinobacteria     |
| 0   | 0   | 0   | 0 [u'k__Bacteria', u'p__Actinobacteria', u'c__Actinobacteria     |
| 0   | 0   | 0   | 0 [u'k__Bacteria', u'p__Proteobacteria', u'c__Gammaprotec        |
| 68  | 189 | 1   | 0 [u'k__Bacteria', u'p__Firmicutes', u'c__Clostridia', u'o__C    |
| 0   | 0   | 0   | 0 [u'k__Bacteria', u'p__Bacteroidetes', u'c__Bacteroidia', u'    |
| 393 | 892 | 11  | 141 [u'k__Bacteria', u'p__Proteobacteria', u'c__Gammaprotec      |
| 0   | 0   | 0   | 0 [u'k__Bacteria', u'p__Proteobacteria', u'c__Gammaprotec        |
| 0   | 0   | 0   | 0 [u'k__Bacteria', u'p__Bacteroidetes', u'c__Bacteroidia', u'    |
| 0   | 0   | 0   | 0 [u'k__Bacteria', u'p__Firmicutes', u'c__Clostridia', u'o__C    |
| 0   | 0   | 0   | 0 [u'k__Bacteria', u'p__Firmicutes', u'c__Bacilli', u'o__Bacill  |
| 0   | 0   | 0   | 0 [u'k__Bacteria', u'p__Proteobacteria', u'c__Betaproteoba       |
| 0   | 0   | 0   | 0 [u'k__Bacteria', u'p__Proteobacteria', u'c__Betaproteoba       |
| 0   | 0   | 0   | 0 [u'k__Bacteria', u'p__Bacteroidetes', u'c__Bacteroidia', u'    |
| 0   | 1   | 0   | 0 [u'k__Bacteria', u'p__Firmicutes', u'c__Clostridia', u'o__C    |
| 0   | 0   | 0   | 0 [u'k__Bacteria', u'p__Actinobacteria', u'c__Actinobacteria     |
| 0   | 0   | 0   | 369 [u'k__Bacteria', u'p__Firmicutes', u'c__Clostridia', u'o__C  |
| 0   | 0   | 0   | 1 [u'k__Bacteria', u'p__Bacteroidetes', u'c__Bacteroidia', u'    |
| 0   | 0   | 0   | 0 [u'k__Bacteria', u'p__Chlorobi', u'c__OPB56', u'o__', u'f__    |



|   |    |   |                                                                  |
|---|----|---|------------------------------------------------------------------|
| 0 | 0  | 0 | 0 [u'k__Bacteria', u'p__Proteobacteria', u'c__Betaproteobac      |
| 0 | 0  | 0 | 0 [u'k__Bacteria', u'p__Firmicutes', u'c__Clostridia', u'o__C    |
| 0 | 0  | 0 | 0 [u'k__Bacteria', u'p__Actinobacteria', u'c__Coriobacteriia'    |
| 2 | 0  | 0 | 0 [u'k__Bacteria', u'p__Proteobacteria', u'c__Gammaprotec        |
| 4 | 15 | 1 | 0 [u'k__Bacteria', u'p__Proteobacteria', u'c__Gammaprotec        |
| 0 | 0  | 0 | 0 [u'k__Bacteria', u'p__Firmicutes', u'c__Bacilli', u'o__Bacill  |
| 0 | 0  | 0 | 0 [u'k__Bacteria', u'p__Proteobacteria', u'c__Betaproteobac      |
| 0 | 0  | 0 | 0 [u'k__Bacteria', u'p__Proteobacteria', u'c__Alphaproteoba      |
| 0 | 0  | 2 | 0 [u'k__Bacteria', u'p__Bacteroidetes', u'c__Bacteroidia', u'    |
| 0 | 0  | 0 | 0 [u'k__Bacteria', u'p__Firmicutes', u'c__Bacilli', u'o__Lactc   |
| 0 | 0  | 0 | 0 [u'k__Bacteria', u'p__Firmicutes', u'c__Bacilli', u'o__Lactc   |
| 0 | 0  | 0 | 0 [u'k__Bacteria', u'p__Firmicutes', u'c__Clostridia', u'o__C    |
| 1 | 0  | 0 | 0 [u'k__Bacteria', u'p__Firmicutes', u'c__Clostridia', u'o__C    |
| 0 | 0  | 0 | 0 [u'k__Bacteria', u'p__Firmicutes', u'c__Bacilli', u'o__Lactc   |
| 0 | 1  | 0 | 0 [u'k__Bacteria', u'p__Proteobacteria', u'c__Gammaprotec        |
| 0 | 0  | 0 | 21 [u'k__Bacteria', u'p__Firmicutes', u'c__Erysipelotrichi', u'c |
| 0 | 0  | 0 | 0 [u'k__Bacteria', u'p__Firmicutes', u'c__Bacilli', u'o__Lactc   |
| 2 | 3  | 0 | 0 [u'k__Bacteria', u'p__Proteobacteria', u'c__Gammaprotec        |
| 0 | 2  | 0 | 1 [u'k__Bacteria', u'p__Firmicutes', u'c__Bacilli', u'o__Lactc   |
| 1 | 3  | 0 | 0 [u'k__Bacteria', u'p__Proteobacteria', u'c__Gammaprotec        |
| 0 | 0  | 1 | 0 [u'k__Bacteria', u'p__Proteobacteria', u'c__Gammaprotec        |
| 0 | 0  | 0 | 0 [u'k__Bacteria', u'p__Firmicutes', u'c__Clostridia', u'o__C    |
| 0 | 0  | 0 | 0 [u'k__Bacteria', u'p__Firmicutes', u'c__Bacilli', u'o__Lactc   |
| 0 | 0  | 0 | 0 [u'k__Bacteria', u'p__Bacteroidetes', u'c__Bacteroidia', u'    |
| 0 | 0  | 0 | 0 [u'k__Bacteria', u'p__Bacteroidetes', u'c__Bacteroidia', u'    |
| 0 | 0  | 0 | 0 [u'k__Bacteria', u'p__Firmicutes', u'c__Clostridia', u'o__C    |
| 0 | 0  | 0 | 0 [u'k__Bacteria', u'p__Proteobacteria', u'c__Epsilonproteo      |
| 0 | 0  | 0 | 0 [u'k__Bacteria', u'p__Firmicutes', u'c__Clostridia', u'o__C    |
| 0 | 0  | 0 | 0 [u'k__Bacteria', u'p__Firmicutes', u'c__Clostridia', u'o__C    |
| 0 | 0  | 0 | 0 [u'k__Bacteria', u'p__Proteobacteria', u'c__Betaproteobac      |
| 0 | 0  | 0 | 0 [u'k__Bacteria', u'p__Bacteroidetes', u'c__Bacteroidia', u'    |
| 0 | 0  | 0 | 0 [u'k__Bacteria', u'p__Firmicutes', u'c__Clostridia', u'o__C    |
| 0 | 0  | 0 | 0 [u'k__Bacteria', u'p__Firmicutes', u'c__Clostridia', u'o__C    |
| 0 | 0  | 0 | 0 [u'k__Bacteria', u'p__Firmicutes', u'c__Clostridia', u'o__C    |
| 0 | 0  | 0 | 0 [u'k__Bacteria', u'p__Firmicutes', u'c__Clostridia', u'o__C    |
| 0 | 0  | 7 | 0 [u'k__Bacteria', u'p__Proteobacteria', u'c__Deltaproteoba      |
| 0 | 0  | 0 | 0 [u'k__Bacteria', u'p__Proteobacteria', u'c__Gammaprotec        |
| 0 | 0  | 0 | 0 [u'k__Bacteria', u'p__Firmicutes', u'c__Bacilli', u'o__Bacill  |
| 0 | 0  | 0 | 0 [u'k__Bacteria', u'p__Firmicutes', u'c__Bacilli', u'o__Lactc   |
| 1 | 1  | 0 | 0 [u'k__Bacteria', u'p__Proteobacteria', u'c__Gammaprotec        |
| 0 | 0  | 0 | 0 [u'k__Bacteria', u'p__Firmicutes', u'c__Clostridia', u'o__C    |
| 0 | 0  | 0 | 2 [u'k__Bacteria', u'p__Firmicutes', u'c__Clostridia', u'o__C    |
| 0 | 0  | 0 | 0 [u'k__Bacteria', u'p__Firmicutes', u'c__Clostridia', u'o__C    |
| 0 | 0  | 0 | 0 [u'k__Bacteria', u'p__Firmicutes', u'c__Clostridia', u'o__C    |
| 0 | 0  | 0 | 0 [u'k__Bacteria', u'p__Firmicutes', u'c__Clostridia', u'o__C    |
| 0 | 0  | 0 | 0 [u'k__Bacteria', u'p__Firmicutes', u'c__Clostridia', u'o__C    |
| 0 | 0  | 0 | 0 [u'k__Bacteria', u'p__Proteobacteria', u'c__Gammaprotec        |
| 0 | 0  | 0 | 0 [u'k__Bacteria', u'p__Bacteroidetes', u'c__Bacteroidia', u'    |
| 0 | 0  | 0 | 0 [u'k__Bacteria', u'p__Firmicutes', u'c__Clostridia', u'o__C    |
| 0 | 0  | 0 | 0 [u'k__Bacteria', u'p__Actinobacteria', u'c__Actinobacteria     |
| 0 | 0  | 0 | 0 [u'k__Bacteria', u'p__Firmicutes', u'c__Clostridia', u'o__C    |
| 0 | 0  | 0 | 2 [u'k__Bacteria', u'p__Firmicutes', u'c__Clostridia', u'o__C    |
| 0 | 0  | 0 | 0 [u'k__Bacteria', u'p__Bacteroidetes', u'c__Bacteroidia', u'    |
| 0 | 0  | 0 | 0 [u'k__Bacteria', u'p__Firmicutes', u'c__Bacilli', u'o__Lactc   |
| 0 | 1  | 0 | 0 [u'k__Bacteria', u'p__Proteobacteria', u'c__Gammaprotec        |
| 1 | 0  | 0 | 0 [u'k__Bacteria', u'p__Firmicutes', u'c__Bacilli', u'o__Gem     |
| 0 | 0  | 0 | 0 [u'k__Bacteria', u'p__Firmicutes', u'c__Bacilli', u'o__Bacill  |





|    |   |   |                                                                 |
|----|---|---|-----------------------------------------------------------------|
| 0  | 0 | 0 | 1 [u'k__Bacteria', u'p__Firmicutes', u'c__Erysipelotrichi', u'c |
| 0  | 0 | 0 | 0 [u'k__Bacteria', u'p__Firmicutes', u'c__Clostridia', u'o__C   |
| 0  | 0 | 0 | 0 [u'k__Bacteria', u'p__Firmicutes', u'c__Erysipelotrichi', u'c |
| 0  | 0 | 0 | 0 [u'k__Bacteria', u'p__Actinobacteria', u'c__Actinobacteria    |
| 1  | 0 | 8 | 1 [u'k__Bacteria', u'p__Firmicutes', u'c__Bacilli', u'o__Lactc  |
| 1  | 0 | 0 | 0 [u'k__Bacteria', u'p__Proteobacteria', u'c__Gammaprotec       |
| 0  | 0 | 0 | 0 [u'k__Bacteria', u'p__Firmicutes', u'c__Clostridia', u'o__C   |
| 0  | 0 | 0 | 0 [u'k__Bacteria', u'p__Firmicutes', u'c__Bacilli', u'o__Bacill |
| 1  | 0 | 0 | 2 [u'k__Bacteria', u'p__Firmicutes', u'c__Clostridia', u'o__C   |
| 0  | 0 | 0 | 0 [u'k__Bacteria', u'p__Proteobacteria', u'c__Gammaprotec       |
| 0  | 0 | 0 | 0 [u'k__Bacteria', u'p__Proteobacteria', u'c__Alphaproteob      |
| 0  | 0 | 0 | 28 [u'k__Bacteria', u'p__Firmicutes', u'c__Clostridia', u'o__C  |
| 0  | 0 | 0 | 0 [u'k__Bacteria', u'p__Firmicutes', u'c__Bacilli', u'o__Lactc  |
| 0  | 0 | 4 | 6 [u'k__Bacteria', u'p__Bacteroidetes', u'c__Bacteroidia', u'   |
| 0  | 0 | 0 | 0 [u'k__Bacteria', u'p__Firmicutes', u'c__Bacilli', u'o__Lactc  |
| 0  | 0 | 0 | 0 [u'k__Bacteria', u'p__Proteobacteria', u'c__Gammaprotec       |
| 0  | 0 | 0 | 0 [u'k__Bacteria', u'p__Firmicutes', u'c__Bacilli', u'o__Lactc  |
| 0  | 0 | 0 | 0 [u'k__Bacteria', u'p__Proteobacteria', u'c__Betaproteoba      |
| 0  | 0 | 0 | 0 [u'k__Bacteria', u'p__Bacteroidetes', u'c__Bacteroidia', u'   |
| 0  | 1 | 2 | 0 [u'k__Bacteria', u'p__Actinobacteria', u'c__Actinobacteria    |
| 0  | 0 | 0 | 0 [u'k__Bacteria', u'p__Firmicutes', u'c__Clostridia', u'o__C   |
| 0  | 0 | 0 | 0 [u'k__Bacteria', u'p__Firmicutes', u'c__Clostridia', u'o__C   |
| 0  | 0 | 0 | 0 [u'k__Bacteria', u'p__Proteobacteria', u'c__Alphaproteoba     |
| 0  | 0 | 0 | 1 [u'k__Bacteria', u'p__Proteobacteria', u'c__Gammaprotec       |
| 0  | 0 | 0 | 0 [u'k__Bacteria', u'p__Bacteroidetes', u'c__Bacteroidia', u'   |
| 0  | 0 | 0 | 0 [u'k__Bacteria', u'p__Proteobacteria', u'c__Gammaprotec       |
| 0  | 0 | 0 | 0 [u'k__Bacteria', u'p__Firmicutes', u'c__Clostridia', u'o__C   |
| 0  | 0 | 0 | 0 [u'k__Bacteria', u'p__Proteobacteria', u'c__Alphaproteoba     |
| 0  | 0 | 0 | 1 [u'k__Bacteria', u'p__Firmicutes', u'c__Clostridia', u'o__C   |
| 0  | 0 | 0 | 0 [u'k__Bacteria', u'p__Actinobacteria', u'c__Actinobacteria    |
| 0  | 0 | 0 | 0 [u'k__Bacteria', u'p__Bacteroidetes', u'c__Bacteroidia', u'   |
| 0  | 0 | 0 | 0 [u'k__Bacteria', u'p__Proteobacteria', u'c__Gammaprotec       |
| 0  | 0 | 0 | 0 [u'k__Bacteria', u'p__Firmicutes', u'c__Clostridia', u'o__C   |
| 2  | 0 | 0 | 0 [u'k__Bacteria', u'p__Firmicutes', u'c__Bacilli', u'o__Lactc  |
| 0  | 0 | 0 | 3 [u'k__Bacteria', u'p__Bacteroidetes', u'c__Bacteroidia', u'   |
| 0  | 0 | 0 | 0 [u'k__Bacteria', u'p__Firmicutes', u'c__Clostridia', u'o__C   |
| 0  | 0 | 0 | 0 [u'k__Bacteria', u'p__Firmicutes', u'c__Clostridia', u'o__C   |
| 0  | 0 | 0 | 0 [u'k__Bacteria', u'p__Firmicutes', u'c__Clostridia', u'o__C   |
| 0  | 1 | 0 | 1 [u'k__Bacteria', u'p__Firmicutes', u'c__Bacilli', u'o__Lactc  |
| 0  | 0 | 0 | 0 [u'k__Bacteria', u'p__Firmicutes', u'c__Bacilli', u'o__Lactc  |
| 0  | 0 | 0 | 0 [u'k__Bacteria', u'p__Proteobacteria', u'c__Alphaproteoba     |
| 0  | 0 | 0 | 0 [u'k__Bacteria', u'p__Bacteroidetes', u'c__Bacteroidia', u'   |
| 0  | 0 | 0 | 0 [u'k__Bacteria', u'p__Firmicutes', u'c__Clostridia', u'o__C   |
| 0  | 0 | 0 | 0 [u'k__Bacteria', u'p__Firmicutes', u'c__Erysipelotrichi', u'c |
| 0  | 0 | 0 | 0 [u'k__Bacteria', u'p__Firmicutes', u'c__Clostridia', u'o__C   |
| 0  | 0 | 0 | 0 [u'k__Bacteria', u'p__Actinobacteria', u'c__Actinobacteria    |
| 0  | 0 | 0 | 0 [u'k__Bacteria', u'p__Firmicutes', u'c__Bacilli', u'o__Bacill |
| 0  | 0 | 0 | 0 [u'k__Bacteria', u'p__Firmicutes', u'c__Clostridia', u'o__C   |
| 0  | 0 | 0 | 0 [u'k__Bacteria', u'p__Proteobacteria', u'c__Alphaproteoba     |
| 0  | 0 | 0 | 2 [u'k__Bacteria', u'p__Bacteroidetes', u'c__Bacteroidia', u'   |
| 0  | 1 | 0 | 0 [u'k__Bacteria', u'p__Firmicutes', u'c__Clostridia', u'o__C   |
| 20 | 0 | 0 | 0 [u'k__Bacteria', u'p__Fusobacteria', u'c__Fusobacteriia', u'  |
| 0  | 0 | 0 | 0 [u'k__Bacteria', u'p__Firmicutes', u'c__Bacilli', u'o__Lactc  |
| 0  | 0 | 0 | 105 [u'k__Bacteria', u'p__Firmicutes', u'c__Clostridia', u'o__C |
| 0  | 0 | 0 | 2 [u'k__Bacteria', u'p__Firmicutes', u'c__Clostridia', u'o__C   |
| 0  | 0 | 0 | 0 [u'k__Bacteria', u'p__Bacteroidetes', u'c__Flavobacteriia',   |









































|   |   |   |                                                                 |
|---|---|---|-----------------------------------------------------------------|
| 0 | 0 | 0 | 0 [u'Unassigned']                                               |
| 0 | 0 | 0 | 0 [u'k__Bacteria', u'p__Proteobacteria', u'c__Gammaprotec       |
| 4 | 0 | 0 | 0 [u'k__Bacteria', u'p__Firmicutes', u'c__Clostridia', u'o__C   |
| 0 | 0 | 0 | 0 [u'k__Bacteria', u'p__Firmicutes', u'c__Bacilli', u'o__Lactc  |
| 0 | 0 | 0 | 0 [u'k__Bacteria', u'p__Cyanobacteria', u'c__Chloroplast', u    |
| 0 | 0 | 0 | 0 [u'k__Bacteria', u'p__Firmicutes', u'c__Bacilli', u'o__Lactc  |
| 0 | 0 | 0 | 0 [u'k__Bacteria', u'p__Actinobacteria', u'c__Actinobacteria    |
| 0 | 0 | 0 | 0 [u'k__Bacteria', u'p__Actinobacteria', u'c__Rubrobacteria'    |
| 0 | 0 | 0 | 0 [u'k__Bacteria', u'p__Actinobacteria', u'c__Actinobacteria    |
| 0 | 1 | 0 | 0 [u'k__Bacteria', u'p__Firmicutes', u'c__Bacilli', u'o__Lactc  |
| 0 | 0 | 0 | 0 [u'k__Bacteria', u'p__Firmicutes', u'c__Bacilli', u'o__Lactc  |
| 0 | 0 | 0 | 0 [u'k__Bacteria', u'p__Firmicutes', u'c__Clostridia', u'o__C   |
| 0 | 0 | 0 | 0 [u'k__Bacteria', u'p__Firmicutes', u'c__Bacilli', u'o__Lactc  |
| 0 | 1 | 0 | 0 [u'k__Bacteria', u'p__Proteobacteria', u'c__Gammaprotec       |
| 0 | 0 | 0 | 0 [u'k__Bacteria', u'p__Firmicutes', u'c__Bacilli', u'o__Lactc  |
| 0 | 0 | 0 | 0 [u'k__Bacteria', u'p__Firmicutes', u'c__Bacilli', u'o__Lactc  |
| 0 | 0 | 0 | 0 [u'k__Bacteria', u'p__Firmicutes', u'c__Bacilli', u'o__Lactc  |
| 0 | 0 | 0 | 0 [u'k__Bacteria', u'p__Firmicutes', u'c__Clostridia', u'o__C   |
| 0 | 0 | 0 | 0 [u'k__Bacteria', u'p__Firmicutes', u'c__Bacilli', u'o__Bacill |
| 0 | 0 | 0 | 0 [u'k__Bacteria', u'p__Actinobacteria', u'c__Actinobacteria    |
| 0 | 0 | 0 | 0 [u'k__Bacteria', u'p__Firmicutes', u'c__Bacilli', u'o__Lactc  |
| 0 | 0 | 0 | 0 [u'k__Bacteria', u'p__Bacteroidetes', u'c__Bacteroidia', u'   |
| 0 | 0 | 0 | 0 [u'k__Bacteria', u'p__Actinobacteria', u'c__Actinobacteria    |
| 0 | 0 | 0 | 0 [u'k__Bacteria', u'p__Actinobacteria', u'c__Actinobacteria    |
| 0 | 0 | 0 | 0 [u'k__Bacteria', u'p__Actinobacteria', u'c__Actinobacteria    |
| 0 | 0 | 0 | 0 [u'k__Bacteria', u'p__Bacteroidetes', u'c__Bacteroidia', u'   |
| 0 | 0 | 0 | 0 [u'k__Bacteria', u'p__Proteobacteria', u'c__Gammaprotec       |
| 0 | 0 | 0 | 0 [u'k__Bacteria', u'p__Actinobacteria', u'c__Actinobacteria    |
| 0 | 0 | 0 | 0 [u'k__Bacteria', u'p__Firmicutes', u'c__Bacilli', u'o__Lactc  |
| 0 | 0 | 1 | 0 [u'k__Bacteria', u'p__Actinobacteria', u'c__Actinobacteria    |
| 0 | 0 | 0 | 0 [u'k__Bacteria', u'p__Actinobacteria', u'c__Coriobacteriia'   |
| 0 | 0 | 0 | 0 [u'k__Bacteria', u'p__Verrucomicrobia', u'c__Verrucomicr      |
| 0 | 0 | 0 | 0 [u'k__Bacteria', u'p__Actinobacteria', u'c__Actinobacteria    |
| 0 | 0 | 0 | 0 [u'k__Bacteria', u'p__Proteobacteria', u'c__Betaproteoba      |
| 0 | 0 | 0 | 0 [u'k__Bacteria', u'p__Proteobacteria', u'c__Gammaprotec       |
| 0 | 0 | 0 | 0 [u'k__Bacteria', u'p__Firmicutes', u'c__Clostridia', u'o__C   |
| 0 | 0 | 0 | 0 [u'k__Bacteria', u'p__Firmicutes', u'c__Bacilli', u'o__Lactc  |
| 0 | 0 | 0 | 0 [u'k__Bacteria', u'p__Firmicutes', u'c__Bacilli', u'o__Bacill |
| 1 | 0 | 0 | 0 [u'k__Bacteria', u'p__Bacteroidetes', u'c__Bacteroidia', u'   |
| 0 | 0 | 0 | 0 [u'k__Bacteria', u'p__Firmicutes', u'c__Clostridia', u'o__C   |
| 0 | 0 | 0 | 0 [u'k__Bacteria', u'p__Firmicutes', u'c__Bacilli', u'o__Lactc  |
| 0 | 0 | 0 | 0 [u'k__Bacteria', u'p__Proteobacteria', u'c__Alphaproteoba     |
| 0 | 0 | 0 | 0 [u'k__Bacteria', u'p__Firmicutes', u'c__Bacilli', u'o__Lactc  |
| 0 | 0 | 0 | 0 [u'Unassigned']                                               |
| 0 | 0 | 0 | 0 [u'k__Bacteria', u'p__Firmicutes', u'c__Bacilli', u'o__Lactc  |
| 0 | 0 | 0 | 0 [u'k__Bacteria', u'p__Firmicutes', u'c__Bacilli', u'o__Lactc  |
| 1 | 0 | 0 | 1 [u'k__Bacteria', u'p__Proteobacteria', u'c__Gammaprotec       |
| 0 | 0 | 0 | 0 [u'k__Bacteria', u'p__Proteobacteria', u'c__Gammaprotec       |
| 0 | 0 | 0 | 0 [u'k__Bacteria', u'p__Proteobacteria', u'c__Gammaprotec       |
| 0 | 0 | 0 | 0 [u'k__Bacteria', u'p__Proteobacteria', u'c__Betaproteoba      |
| 0 | 0 | 0 | 0 [u'k__Bacteria', u'p__Proteobacteria', u'c__Gammaprotec       |
| 0 | 0 | 0 | 0 [u'k__Bacteria', u'p__Actinobacteria', u'c__Actinobacteria    |
| 0 | 0 | 0 | 0 [u'k__Bacteria', u'p__Firmicutes', u'c__Bacilli', u'o__Lactc  |
| 0 | 0 | 0 | 0 [u'k__Bacteria', u'p__Bacteroidetes', u'c__Bacteroidia', u'   |
| 0 | 0 | 2 | 0 [u'k__Bacteria', u'p__Bacteroidetes', u'c__Bacteroidia', u'   |
| 0 | 0 | 0 | 0 [u'k__Bacteria', u'p__Firmicutes', u'c__Bacilli', u'o__Lactc  |





























































|      |      |      |                                                                 |
|------|------|------|-----------------------------------------------------------------|
| 0    | 0    | 0    | 0 [u'k__Bacteria', u'p__Firmicutes', u'c__Clostridia', u'o__C   |
| 0    | 0    | 0    | 0 [u'k__Bacteria', u'p__Actinobacteria', u'c__Actinobacteria    |
| 0    | 0    | 0    | 0 [u'k__Bacteria', u'p__Bacteroidetes', u'c__Bacteroidia', u'   |
| 0    | 0    | 0    | 0 [u'k__Bacteria', u'p__Firmicutes', u'c__Clostridia', u'o__C   |
| 0    | 0    | 0    | 0 [u'k__Bacteria', u'p__Firmicutes', u'c__Clostridia', u'o__C   |
| 0    | 0    | 0    | 0 [u'k__Bacteria', u'p__Actinobacteria', u'c__Actinobacteria    |
| 0    | 0    | 0    | 0 [u'k__Bacteria', u'p__Bacteroidetes', u'c__Bacteroidia', u'   |
| 0    | 0    | 0    | 0 [u'k__Bacteria', u'p__Firmicutes', u'c__Bacilli', u'o__Lactc  |
| 0    | 0    | 0    | 0 [u'k__Bacteria', u'p__Firmicutes', u'c__Bacilli', u'o__Lactc  |
| 0    | 0    | 0    | 0 [u'k__Bacteria', u'p__Firmicutes', u'c__Bacilli', u'o__Lactc  |
| 0    | 1    | 0    | 0 [u'k__Bacteria', u'p__Proteobacteria', u'c__Gammaprotec       |
| 0    | 0    | 0    | 0 [u'k__Bacteria', u'p__Proteobacteria', u'c__Betaproteoba      |
| 0    | 0    | 0    | 0 [u'k__Bacteria', u'p__Firmicutes', u'c__Bacilli', u'o__Lactc  |
| 0    | 0    | 0    | 0 [u'k__Bacteria', u'p__Actinobacteria', u'c__Actinobacteria    |
| 1    | 0    | 0    | 0 [u'k__Bacteria', u'p__Proteobacteria', u'c__Gammaprotec       |
| 0    | 0    | 0    | 0 [u'k__Bacteria', u'p__Firmicutes', u'c__Clostridia', u'o__C   |
| 0    | 0    | 0    | 0 [u'k__Bacteria', u'p__Firmicutes', u'c__Bacilli', u'o__Lactc  |
| 0    | 0    | 0    | 3 [u'k__Bacteria', u'p__Firmicutes', u'c__Clostridia', u'o__C   |
| 1    | 0    | 0    | 1 [u'k__Bacteria', u'p__Firmicutes', u'c__Clostridia', u'o__C   |
| 0    | 0    | 0    | 0 [u'k__Bacteria', u'p__Actinobacteria', u'c__Actinobacteria    |
| 0    | 0    | 0    | 0 [u'k__Bacteria', u'p__Proteobacteria', u'c__Gammaprotec       |
| 0    | 0    | 0    | 0 [u'k__Bacteria', u'p__Proteobacteria', u'c__Betaproteoba      |
| 1    | 0    | 0    | 0 [u'k__Bacteria', u'p__Firmicutes', u'c__Clostridia', u'o__C   |
| 0    | 0    | 0    | 0 [u'k__Bacteria', u'p__Proteobacteria', u'c__Betaproteoba      |
| 0    | 0    | 0    | 0 [u'k__Bacteria', u'p__Actinobacteria', u'c__Actinobacteria    |
| 0    | 0    | 0    | 0 [u'k__Bacteria', u'p__Firmicutes', u'c__Bacilli', u'o__Lactc  |
| 0    | 0    | 0    | 0 [u'k__Bacteria', u'p__Proteobacteria', u'c__Gammaprotec       |
| 0    | 0    | 0    | 0 [u'k__Bacteria', u'p__Firmicutes', u'c__Bacilli', u'o__Lactc  |
| 0    | 0    | 0    | 0 [u'k__Bacteria', u'p__Proteobacteria', u'c__Betaproteoba      |
| 0    | 0    | 0    | 0 [u'k__Bacteria', u'p__Firmicutes', u'c__Bacilli', u'o__Lactc  |
| 0    | 0    | 0    | 0 [u'k__Bacteria', u'p__Firmicutes', u'c__Bacilli', u'o__Lactc  |
| 0    | 0    | 0    | 0 [u'k__Bacteria', u'p__Firmicutes', u'c__Clostridia', u'o__C   |
| 0    | 1    | 0    | 0 [u'k__Bacteria', u'p__Firmicutes', u'c__Clostridia', u'o__C   |
| 0    | 0    | 0    | 0 [u'k__Bacteria', u'p__Firmicutes', u'c__Erysipelotrichi', u'c |
| 0    | 0    | 0    | 0 [u'k__Bacteria', u'p__Firmicutes', u'c__Clostridia', u'o__C   |
| 0    | 0    | 0    | 0 [u'k__Bacteria', u'p__Firmicutes', u'c__Bacilli', u'o__Lactc  |
| 0    | 0    | 0    | 0 [u'k__Bacteria', u'p__Bacteroidetes', u'c__Bacteroidia', u'   |
| 0    | 0    | 0    | 0 [u'k__Bacteria', u'p__Verrucomicrobia', u'c__Verrucomicr      |
| 0    | 0    | 0    | 0 [u'k__Bacteria', u'p__Actinobacteria', u'c__Actinobacteria    |
| 0    | 0    | 0    | 0 [u'k__Bacteria', u'p__Actinobacteria', u'c__Actinobacteria    |
| 6926 | 8583 | 6545 | 7278                                                            |

i', u'o\_\_Actinomycetales', u'f\_\_Corynebacteriaceae', u'g\_\_Corynebacterium', u's\_\_']  
 :lostridiales']  
 lales', u'f\_\_Bacillaceae', u'g\_\_', u's\_\_']  
 obacteria', u'o\_\_Pseudomonadales', u'f\_\_Moraxellaceae', u'g\_\_Moraxella', u's\_\_']  
 i', u'o\_\_Actinomycetales', u'f\_\_Corynebacteriaceae', u'g\_\_Corynebacterium', u's\_\_']  
 'o\_\_Bacteroidales', u'f\_\_Bacteroidaceae', u'g\_\_Bacteroides', u's\_\_']  
 'o\_\_Bacteroidales', u'f\_\_Bacteroidaceae', u'g\_\_Bacteroides', u's\_\_']  
 o\_\_Erysipelotrichales', u'f\_\_Erysipelotrichaceae', u'g\_\_Catenibacterium', u's\_\_']  
 obacteria', u'o\_\_Pseudomonadales', u'f\_\_Moraxellaceae', u'g\_\_Moraxella', u's\_\_']  
 obacillales', u'f\_\_Lactobacillaceae', u'g\_\_Lactobacillus', u's\_\_zeae']  
 i', u'o\_\_Actinomycetales', u'f\_\_Micrococcaceae', u'g\_\_Rothia', u's\_\_mucilaginsa']  
 obacillales', u'f\_\_Lactobacillaceae', u'g\_\_Lactobacillus', u's\_\_zeae']  
 obacteria', u'o\_\_Enterobacteriales', u'f\_\_Enterobacteriaceae', u'g\_\_Providencia', u's\_\_']  
 :lostridiales', u'f\_\_Lachnospiraceae', u'g\_\_Blautia', u's\_\_']  
 obacteria', u'o\_\_Pasteurellales', u'f\_\_Pasteurellaceae', u'g\_\_Haemophilus', u's\_\_']  
 :lostridiales', u'f\_\_Lachnospiraceae', u'g\_\_', u's\_\_']  
 obacteria', u'o\_\_Pasteurellales', u'f\_\_Pasteurellaceae', u'g\_\_Haemophilus', u's\_\_influenzae']  
 :lostridiales', u'f\_\_Peptococcaceae', u'g\_\_', u's\_\_']  
 obacillales', u'f\_\_Lactobacillaceae', u'g\_\_', u's\_\_']  
 obacillales', u'f\_\_Lactobacillaceae', u'g\_\_Lactobacillus', u's\_\_zeae']  
 obacillales', u'f\_\_Streptococcaceae', u'g\_\_Streptococcus', u's\_\_']  
 :lostridiales', u'f\_\_Ruminococcaceae', u'g\_\_', u's\_\_']  
 obacteria', u'o\_\_Enterobacteriales', u'f\_\_Enterobacteriaceae', u'g\_\_', u's\_\_']  
 :lostridiales', u'f\_\_Ruminococcaceae', u'g\_\_Oscillospira', u's\_\_']  
 obacillales', u'f\_\_Enterococcaceae', u'g\_\_Enterococcus', u's\_\_']  
 obacillales', u'f\_\_Streptococcaceae', u'g\_\_Lactococcus', u's\_\_']  
 lales', u'f\_\_Staphylococcaceae', u'g\_\_Staphylococcus']  
 acteria', u'o\_\_Sphingomonadales', u'f\_\_Sphingomonadaceae', u'g\_\_Kaistobacter', u's\_\_']  
 obacillales', u'f\_\_Lactobacillaceae', u'g\_\_Lactobacillus', u's\_\_']  
 acteria', u'o\_\_Burkholderiales', u'f\_\_Comamonadaceae', u'g\_\_Delftia', u's\_\_']  
 obacillales', u'f\_\_Leuconostocaceae', u'g\_\_Leuconostoc', u's\_\_']  
 :lostridiales', u'f\_\_[Tissierellaceae]', u'g\_\_Anaerococcus', u's\_\_']  
 ', u'o\_\_Coriobacteriales', u'f\_\_Coriobacteriaceae', u'g\_\_Atopobium', u's\_\_']  
 obacillales', u'f\_\_Lactobacillaceae', u'g\_\_Lactobacillus', u's\_\_zeae']  
 obacteria', u'o\_\_Enterobacteriales', u'f\_\_Enterobacteriaceae', u'g\_\_', u's\_\_']  
 acteria', u'o\_\_Burkholderiales', u'f\_\_Comamonadaceae', u'g\_\_', u's\_\_']  
 acteria', u'o\_\_Rhizobiales', u'f\_\_Bradyrhizobiaceae']  
 :lostridiales', u'f\_\_Clostridiaceae', u'g\_\_Clostridium', u's\_\_']  
 obacillales', u'f\_\_', u'g\_\_', u's\_\_']  
 :lostridiales', u'f\_\_Lachnospiraceae', u'g\_\_Blautia', u's\_\_']  
 :lostridiales', u'f\_\_Lachnospiraceae', u'g\_\_', u's\_\_']  
 :lostridiales', u'f\_\_Clostridiaceae', u'g\_\_', u's\_\_']  
 lales', u'f\_\_Staphylococcaceae', u'g\_\_Staphylococcus']  
 lales', u'f\_\_Staphylococcaceae', u'g\_\_Macroccoccus', u's\_\_']  
 obacillales', u'f\_\_Streptococcaceae', u'g\_\_Streptococcus', u's\_\_']  
 :lostridiales', u'f\_\_Eubacteriaceae', u'g\_\_Pseudoramibacter\_Eubacterium', u's\_\_']  
 obacteria', u'o\_\_Enterobacteriales', u'f\_\_Enterobacteriaceae']  
 :lostridiales', u'f\_\_Clostridiaceae', u'g\_\_', u's\_\_']  
 obacteria', u'o\_\_Enterobacteriales', u'f\_\_Enterobacteriaceae', u'g\_\_', u's\_\_']  
 :lostridiales', u'f\_\_Veillonellaceae', u'g\_\_Dialister', u's\_\_']  
 :lostridiales', u'f\_\_Lachnospiraceae', u'g\_\_Dorea', u's\_\_']  
 obacillales', u'f\_\_Streptococcaceae', u'g\_\_Streptococcus', u's\_\_']  
 :lostridiales', u'f\_\_Clostridiaceae', u'g\_\_', u's\_\_']  
 :lostridiales', u'f\_\_Ruminococcaceae', u'g\_\_Ruminococcus', u's\_\_']

>bacillales', u'f\_\_Enterococcaceae', u'g\_\_Enterococcus', u's\_\_']  
 >bacteria', u'o\_\_Enterobacteriales', u'f\_\_Enterobacteriaceae', u'g\_\_', u's\_\_']  
 >bacillales', u'f\_\_Streptococcaceae', u'g\_\_Streptococcus', u's\_\_']  
 ', u'o\_\_Coriobacteriales', u'f\_\_Coriobacteriaceae', u'g\_\_Collinsella', u's\_\_stercoris']  
 's\_\_']  
 >bacteria', u'o\_\_Enterobacteriales', u'f\_\_Enterobacteriaceae', u'g\_\_Citrobacter', u's\_\_']  
 :lostridiales', u'f\_\_Lachnospiraceae', u'g\_\_Epulopiscium', u's\_\_']  
 i', u'o\_\_Bifidobacteriales', u'f\_\_Bifidobacteriaceae', u'g\_\_Bifidobacterium', u's\_\_']  
 'o\_\_Bacteroidales', u'f\_\_Bacteroidaceae', u'g\_\_Bacteroides', u's\_\_']  
 :lostridiales', u'f\_\_Ruminococcaceae', u'g\_\_', u's\_\_']  
 :lostridiales', u'f\_\_Lachnospiraceae', u'g\_\_Blautia', u's\_\_']  
 >bacteria', u'o\_\_Enterobacteriales', u'f\_\_Enterobacteriaceae', u'g\_\_', u's\_\_']  
 >bacillales', u'f\_\_Streptococcaceae', u'g\_\_Streptococcus', u's\_\_']  
 >bacteria', u'o\_\_Enterobacteriales', u'f\_\_Enterobacteriaceae', u'g\_\_', u's\_\_']  
 lales', u'f\_\_Planococcaceae', u'g\_\_', u's\_\_']  
 i', u'o\_\_Actinomycetales', u'f\_\_Corynebacteriaceae', u'g\_\_Corynebacterium', u's\_\_']  
 'o\_\_Bacteroidales', u'f\_\_Bacteroidaceae', u'g\_\_Bacteroides', u's\_\_fragilis']  
 lales', u'f\_\_Planococcaceae', u'g\_\_', u's\_\_']  
 i', u'o\_\_Actinomycetales', u'f\_\_Cellulomonadaceae', u'g\_\_Cellulomonas', u's\_\_']  
 >bacillales', u'f\_\_Aerococcaceae', u'g\_\_Alloiococcus', u's\_\_']  
 acteria', u'o\_\_Caulobacteriales', u'f\_\_Caulobacteraceae', u'g\_\_Mycoplana', u's\_\_']  
 >bacteria', u'o\_\_Enterobacteriales', u'f\_\_Enterobacteriaceae', u'g\_\_', u's\_\_']  
 'o\_\_Bacteroidales', u'f\_\_Bacteroidaceae', u'g\_\_Bacteroides', u's\_\_']  
 >bacillales', u'f\_\_Streptococcaceae', u'g\_\_Streptococcus']  
 :lostridiales', u'f\_\_Lachnospiraceae', u'g\_\_Blautia', u's\_\_']  
 :lostridiales', u'f\_\_Veillonellaceae', u'g\_\_Veillonella', u's\_\_dispar']  
 :lostridiales', u'f\_\_Clostridiaceae', u'g\_\_', u's\_\_']  
 :lostridiales', u'f\_\_Lachnospiraceae', u'g\_\_', u's\_\_']  
 'o\_\_Bacteroidales', u'f\_\_Prevotellaceae', u'g\_\_Prevotella', u's\_\_melaninogenica']  
 :lostridiales', u'f\_\_Lachnospiraceae', u'g\_\_Blautia', u's\_\_']  
 'o\_\_Bacteroidales', u'f\_\_Porphyromonadaceae', u'g\_\_Parabacteroides', u's\_\_distasonis']  
 >bacteria', u'o\_\_Pseudomonadales', u'f\_\_Moraxellaceae', u'g\_\_Enhydrobacter', u's\_\_']  
 i', u'o\_\_Rubrobacteriales', u'f\_\_Rubrobacteraceae', u'g\_\_Rubrobacter', u's\_\_']  
 >bacteria', u'o\_\_Pseudomonadales', u'f\_\_Moraxellaceae', u'g\_\_Moraxella', u's\_\_']  
 >bacteria', u'o\_\_Xanthomonadales', u'f\_\_Xanthomonadaceae', u'g\_\_Lysobacter', u's\_\_']  
 :lostridiales', u'f\_\_Ruminococcaceae', u'g\_\_Faecalibacterium', u's\_\_prausnitzii']  
 acteria', u'o\_\_Rhodospirillales', u'f\_\_Acetobacteraceae', u'g\_\_Acetobacter', u's\_\_']  
 acteria', u'o\_\_Bdellovibrionales', u'f\_\_Bacteriovoracaceae', u'g\_\_', u's\_\_']  
 :lostridiales', u'f\_\_Lachnospiraceae', u'g\_\_Blautia', u's\_\_']  
 :lostridiales', u'f\_\_Clostridiaceae', u'g\_\_', u's\_\_']  
 >bacillales']  
 :lostridiales', u'f\_\_Clostridiaceae', u'g\_\_', u's\_\_']  
 lales', u'f\_\_Staphylococcaceae', u'g\_\_Staphylococcus', u's\_\_']  
 :lostridiales', u'f\_\_Lachnospiraceae', u'g\_\_[Ruminococcus]', u's\_\_gnavus']  
 :lostridiales', u'f\_\_Lachnospiraceae', u'g\_\_', u's\_\_']  
 >bacillales', u'f\_\_Aerococcaceae', u'g\_\_Alloiococcus', u's\_\_']  
 >bacillales', u'f\_\_Lactobacillaceae', u'g\_\_Lactobacillus', u's\_\_zeae']  
 'o\_\_Bacteroidales', u'f\_\_Bacteroidaceae', u'g\_\_Bacteroides', u's\_\_']  
 >bacteria', u'o\_\_Enterobacteriales', u'f\_\_Enterobacteriaceae', u'g\_\_', u's\_\_']  
 >bacteria', u'o\_\_Xanthomonadales', u'f\_\_Xanthomonadaceae', u'g\_\_Stenotrophomonas', u's\_\_']  
 >bacteria', u'o\_\_Xanthomonadales', u'f\_\_Xanthomonadaceae', u'g\_\_Lysobacter', u's\_\_']  
 :lostridiales', u'f\_\_[Tissierellaceae]', u'g\_\_Peptoniphilus', u's\_\_']  
 'o\_\_Bacteroidales', u'f\_\_Bacteroidaceae', u'g\_\_Bacteroides', u's\_\_']  
 i', u'o\_\_Actinomycetales', u'f\_\_Corynebacteriaceae', u'g\_\_Corynebacterium', u's\_\_']  
 ellales', u'f\_\_Gemellaceae', u'g\_\_', u's\_\_']  
 i', u'o\_\_Actinomycetales', u'f\_\_Corynebacteriaceae', u'g\_\_Corynebacterium', u's\_\_']

:lostridiales', u'f\_\_Lachnospiraceae', u'g\_\_Coprococcus', u's\_\_']  
 'o\_\_Bacteroidales', u'f\_\_Porphyromonadaceae', u'g\_\_Parabacteroides', u's\_\_distasonis']  
 :lostridiales', u'f\_\_Ruminococcaceae', u'g\_\_Ruminococcus', u's\_\_']  
 :lostridiales', u'f\_\_Lachnospiraceae', u'g\_\_Coprococcus', u's\_\_']  
 >bacteria', u'o\_\_Pasteurellales', u'f\_\_Pasteurellaceae', u'g\_\_Aggregatibacter', u's\_\_']  
 lales', u'f\_\_Planococcaceae', u'g\_\_Rummeliibacillus', u's\_\_']  
 >bacillales', u'f\_\_Streptococcaceae', u'g\_\_Lactococcus', u's\_\_']  
 :lostridiales', u'f\_\_Lachnospiraceae', u'g\_\_', u's\_\_']  
 t', u'o\_\_Bifidobacteriales', u'f\_\_Bifidobacteriaceae', u'g\_\_Bifidobacterium']  
 t', u'o\_\_Actinomycetales', u'f\_\_Actinomycetaceae', u'g\_\_Actinomyces', u's\_\_']  
 cteria', u'o\_\_Burkholderiales', u'f\_\_Comamonadaceae', u'g\_\_', u's\_\_']  
 >bacteria', u'o\_\_Enterobacteriales', u'f\_\_Enterobacteriaceae', u'g\_\_', u's\_\_']  
 einococcales', u'f\_\_Deinococcaceae', u'g\_\_Deinococcus', u's\_\_']  
 'o\_\_Bacteroidales', u'f\_\_[Paraprevotellaceae]', u'g\_\_[Prevotella]', u's\_\_']  
 :lostridiales', u'f\_\_Clostridiaceae', u'g\_\_', u's\_\_']  
 'o\_\_Bacteroidales', u'f\_\_Bacteroidaceae', u'g\_\_Bacteroides', u's\_\_']  
 >bacillales', u'f\_\_Aerococcaceae', u'g\_\_Alloiococcus', u's\_\_']  
 'o\_\_Streptophyta', u'f\_\_', u'g\_\_', u's\_\_']  
 :lostridiales', u'f\_\_Lachnospiraceae']  
 >bacteria', u'o\_\_Enterobacteriales', u'f\_\_Enterobacteriaceae', u'g\_\_Erwinia', u's\_\_']  
 :lostridiales', u'f\_\_Lachnospiraceae']  
 >bacillales', u'f\_\_Streptococcaceae', u'g\_\_Streptococcus', u's\_\_']  
 >\_\_Erysipelotrichales', u'f\_\_Erysipelotrichaceae', u'g\_\_Coprobacillus', u's\_\_']  
 t', u'o\_\_Actinomycetales', u'f\_\_Kineosporiaceae', u'g\_\_', u's\_\_']  
 >bacteria', u'o\_\_Enterobacteriales', u'f\_\_Enterobacteriaceae', u'g\_\_Providencia', u's\_\_']  
 :lostridiales', u'f\_\_Clostridiaceae', u'g\_\_', u's\_\_']  
 :lostridiales']  
 >bacillales', u'f\_\_Streptococcaceae', u'g\_\_Streptococcus', u's\_\_']  
 >bacteria', u'o\_\_Pseudomonadales', u'f\_\_Pseudomonadaceae', u'g\_\_Pseudomonas', u's\_\_']  
 :lostridiales', u'f\_\_Ruminococcaceae', u'g\_\_', u's\_\_']  
 >bacteria', u'o\_\_Pseudomonadales', u'f\_\_Moraxellaceae', u'g\_\_Enhydrobacter', u's\_\_']  
 acteria', u'o\_\_Rhizobiales', u'f\_\_Phyllobacteriaceae', u'g\_\_Phyllobacterium', u's\_\_']  
 >bacillales', u'f\_\_Streptococcaceae', u'g\_\_Streptococcus', u's\_\_']  
 lales', u'f\_\_Staphylococcaceae', u'g\_\_Staphylococcus', u's\_\_']  
 ellales']  
 'o\_\_Bacteroidales', u'f\_\_Prevotellaceae', u'g\_\_Prevotella', u's\_\_']  
 lales', u'f\_\_Staphylococcaceae', u'g\_\_Staphylococcus']  
 >bacteria', u'o\_\_Enterobacteriales', u'f\_\_Enterobacteriaceae', u'g\_\_', u's\_\_']  
 >bacillales', u'f\_\_Streptococcaceae', u'g\_\_Streptococcus', u's\_\_']  
 >bacillales', u'f\_\_Streptococcaceae', u'g\_\_Streptococcus', u's\_\_']  
 cteria', u'o\_\_Burkholderiales', u'f\_\_Comamonadaceae', u'g\_\_', u's\_\_']  
 cteria', u'o\_\_Burkholderiales', u'f\_\_Comamonadaceae', u'g\_\_', u's\_\_']  
 >bacteria', u'o\_\_Pseudomonadales', u'f\_\_Pseudomonadaceae', u'g\_\_Pseudomonas', u's\_\_']  
 t', u'o\_\_Actinomycetales', u'f\_\_Corynebacteriaceae', u'g\_\_Corynebacterium', u's\_\_']  
 :lostridiales', u'f\_\_[Tissierellaceae]', u'g\_\_Finnegoldia', u's\_\_']  
 >bacteria', u'o\_\_Enterobacteriales', u'f\_\_Enterobacteriaceae', u'g\_\_', u's\_\_']  
 :lostridiales', u'f\_\_Veillonellaceae', u'g\_\_Veillonella', u's\_\_dispar']  
 >bacillales', u'f\_\_Streptococcaceae', u'g\_\_Streptococcus', u's\_\_']  
 :lostridiales', u'f\_\_Clostridiaceae', u'g\_\_', u's\_\_']  
 'o\_\_Bacteroidales', u'f\_\_Bacteroidaceae', u'g\_\_Bacteroides', u's\_\_']  
 >bacillales', u'f\_\_Enterococcaceae', u'g\_\_Enterococcus', u's\_\_']  
 'o\_\_Bacteroidales', u'f\_\_Porphyromonadaceae', u'g\_\_Porphyromonas', u's\_\_']  
 :lostridiales', u'f\_\_Lachnospiraceae', u'g\_\_Blautia', u's\_\_']  
 :lostridiales', u'f\_\_Lachnospiraceae', u'g\_\_Dorea', u's\_\_']  
 >bacteria', u'o\_\_Enterobacteriales', u'f\_\_Enterobacteriaceae', u'g\_\_Providencia', u's\_\_']  
 :lostridiales']



'o\_\_Bacteroidales', u'f\_\_Bacteroidaceae', u'g\_\_Bacteroides', u's\_\_']  
]bacteria', u'o\_\_Pasteurellales', u'f\_\_Pasteurellaceae', u'g\_\_Haemophilus', u's\_\_']  
lales', u'f\_\_Staphylococcaceae', u'g\_\_Staphylococcus']  
]bacteria', u'o\_\_Pseudomonadales', u'f\_\_Pseudomonadaceae', u'g\_\_Pseudomonas', u's\_\_']  
]bacteria', u'o\_\_Enterobacteriales', u'f\_\_Enterobacteriaceae', u'g\_\_Proteus', u's\_\_']  
:lostridiales', u'f\_\_Ruminococcaceae', u'g\_\_Faecalibacterium', u's\_\_prausnitzii']  
i', u'o\_\_Actinomycetales', u'f\_\_Corynebacteriaceae', u'g\_\_Corynebacterium', u's\_\_']  
:lostridiales', u'f\_\_Clostridiaceae', u'g\_\_', u's\_\_']  
lales', u'f\_\_Staphylococcaceae', u'g\_\_Staphylococcus', u's\_\_']  
:lostridiales', u'f\_\_Clostridiaceae', u'g\_\_Clostridium', u's\_\_neonatale']  
]bacteria', u'o\_\_Enterobacteriales', u'f\_\_Enterobacteriaceae', u'g\_\_', u's\_\_']  
acteria', u'o\_\_Burkholderiales', u'f\_\_Alcaligenaceae', u'g\_\_Sutterella', u's\_\_']  
]bacteria', u'o\_\_Enterobacteriales', u'f\_\_Enterobacteriaceae', u'g\_\_', u's\_\_']  
]bacillales', u'f\_\_Enterococcaceae', u'g\_\_Enterococcus', u's\_\_']  
]bacteria', u'o\_\_Pasteurellales', u'f\_\_Pasteurellaceae', u'g\_\_Haemophilus', u's\_\_']  
]bacteria', u'o\_\_Pseudomonadales', u'f\_\_Pseudomonadaceae', u'g\_\_Pseudomonas', u's\_\_']  
]bacteria', u'o\_\_Pasteurellales', u'f\_\_Pasteurellaceae', u'g\_\_Haemophilus', u's\_\_parainfluenzae']  
]bacteria', u'o\_\_Pseudomonadales', u'f\_\_Moraxellaceae', u'g\_\_Moraxella', u's\_\_']  
]bacteria', u'o\_\_Enterobacteriales', u'f\_\_Enterobacteriaceae', u'g\_\_Providencia', u's\_\_']  
]bacteria', u'o\_\_Enterobacteriales', u'f\_\_Enterobacteriaceae', u'g\_\_', u's\_\_']  
acteria', u'o\_\_Rhizobiales', u'f\_\_Phyllobacteriaceae', u'g\_\_Phyllobacterium', u's\_\_']  
]bacteria', u'o\_\_Enterobacteriales', u'f\_\_Enterobacteriaceae', u'g\_\_', u's\_\_']  
acteria', u'o\_\_Burkholderiales', u'f\_\_Comamonadaceae', u'g\_\_', u's\_\_']  
:lostridiales', u'f\_\_[Tissierellaceae]', u'g\_\_Anaerococcus', u's\_\_']  
'o\_\_Bacteroidales', u'f\_\_Bacteroidaceae', u'g\_\_Bacteroides', u's\_\_']  
:lostridiales', u'f\_\_Veillonellaceae', u'g\_\_Veillonella', u's\_\_dispar']  
'o\_\_Bacteroidales', u'f\_\_Rikenellaceae', u'g\_\_', u's\_\_']  
i', u'o\_\_Bifidobacteriales', u'f\_\_Bifidobacteriaceae', u'g\_\_Bifidobacterium', u's\_\_']  
]bacillales', u'f\_\_Streptococcaceae', u'g\_\_Streptococcus', u's\_\_']  
]bacillales', u'f\_\_Streptococcaceae', u'g\_\_Streptococcus', u's\_\_']  
'o\_\_Bacteroidales', u'f\_\_Bacteroidaceae', u'g\_\_Bacteroides', u's\_\_']  
]bacillales', u'f\_\_Streptococcaceae', u'g\_\_Streptococcus', u's\_\_']  
:lostridiales', u'f\_\_Clostridiaceae', u'g\_\_Clostridium', u's\_\_']  
:lostridiales', u'f\_\_Clostridiaceae', u'g\_\_', u's\_\_']  
:lostridiales', u'f\_\_Veillonellaceae', u'g\_\_Veillonella', u's\_\_dispar']  
:lostridiales', u'f\_\_Veillonellaceae', u'g\_\_Veillonella', u's\_\_dispar']  
acteria', u'o\_\_Caulobacteriales', u'f\_\_Caulobacteraceae', u'g\_\_', u's\_\_']  
]\_\_Erysipelotrichales', u'f\_\_Erysipelotrichaceae', u'g\_\_[Eubacterium]', u's\_\_dolichum']  
]bacteria', u'o\_\_Pseudomonadales', u'f\_\_Moraxellaceae', u'g\_\_Acinetobacter', u's\_\_']  
:lostridiales', u'f\_\_Lachnospiraceae', u'g\_\_', u's\_\_']  
:lostridiales', u'f\_\_Ruminococcaceae', u'g\_\_Faecalibacterium', u's\_\_prausnitzii']  
]bacteria', u'o\_\_Pasteurellales', u'f\_\_Pasteurellaceae', u'g\_\_Haemophilus', u's\_\_']  
acteria', u'o\_\_Sphingomonadales', u'f\_\_Sphingomonadaceae', u'g\_\_Sphingomonas', u's\_\_']  
]bacteria', u'o\_\_Pasteurellales', u'f\_\_Pasteurellaceae', u'g\_\_Haemophilus', u's\_\_']  
acteria', u'o\_\_Sphingomonadales', u'f\_\_Sphingomonadaceae', u'g\_\_Novosphingobium', u's\_\_']  
:lostridiales', u'f\_\_Peptococcaceae', u'g\_\_Peptococcus', u's\_\_']  
]bacteria', u'o\_\_Pseudomonadales', u'f\_\_Moraxellaceae', u'g\_\_Moraxella', u's\_\_']  
acteria', u'o\_\_Rhizobiales', u'f\_\_Methylobacteriaceae', u'g\_\_', u's\_\_']  
:lostridiales', u'f\_\_Veillonellaceae', u'g\_\_Megamonas', u's\_\_']  
:lostridiales', u'f\_\_Ruminococcaceae', u'g\_\_', u's\_\_']  
i', u'o\_\_Actinomycetales', u'f\_\_Pseudonocardiaceae', u'g\_\_Pseudonocardia', u's\_\_']  
acteria', u'o\_\_Desulfovibrionales', u'f\_\_Desulfovibrionaceae', u'g\_\_Bilophila', u's\_\_']  
i', u'o\_\_Actinomycetales', u'f\_\_Micrococcaceae', u'g\_\_Microbispora', u's\_\_rosea']  
]bacteria', u'o\_\_Enterobacteriales', u'f\_\_Enterobacteriaceae', u'g\_\_', u's\_\_']  
lales', u'f\_\_Staphylococcaceae', u'g\_\_Staphylococcus', u's\_\_aureus']  
]bacillales', u'f\_\_Streptococcaceae', u'g\_\_Streptococcus', u's\_\_']

>bacillales', u'f\_\_Enterococcaceae', u'g\_\_Enterococcus', u's\_\_']  
 acteria', u'o\_\_Rhizobiales', u'f\_\_Methylobacteriaceae', u'g\_\_', u's\_\_']  
 :lostridiales', u'f\_\_Lachnospiraceae']  
 >bacillales', u'f\_\_Streptococcaceae', u'g\_\_Lactococcus', u's\_\_']  
 :lostridiales', u'f\_\_Veillonellaceae', u'g\_\_Dialister', u's\_\_']  
 :lostridiales', u'f\_\_Lachnospiraceae', u'g\_\_', u's\_\_']  
 :lostridiales', u'f\_\_Ruminococcaceae', u'g\_\_Faecalibacterium', u's\_\_prausnitzii']  
 >bacteria', u'o\_\_Enterobacteriales', u'f\_\_Enterobacteriaceae', u'g\_\_', u's\_\_']  
 :lostridiales', u'f\_\_Clostridiaceae', u'g\_\_', u's\_\_']  
 acteria', u'o\_\_Rhodobacterales', u'f\_\_Rhodobacteraceae', u'g\_\_Paracoccus', u's\_\_aminovorans']  
 >bacillales', u'f\_\_Streptococcaceae', u'g\_\_Streptococcus', u's\_\_']  
 >bacillales', u'f\_\_Carnobacteriaceae', u'g\_\_Granulicatella', u's\_\_']  
 :lostridiales', u'f\_\_[Tissierellaceae]', u'g\_\_Peptoniphilus', u's\_\_']  
 :lostridiales', u'f\_\_Ruminococcaceae', u'g\_\_', u's\_\_']  
 >bacteria', u'o\_\_Enterobacteriales', u'f\_\_Enterobacteriaceae', u'g\_\_', u's\_\_']  
 >bacteria', u'o\_\_Enterobacteriales', u'f\_\_Enterobacteriaceae', u'g\_\_', u's\_\_']  
 >bacillales', u'f\_\_Streptococcaceae', u'g\_\_Streptococcus', u's\_\_']  
 >bacillales', u'f\_\_Enterococcaceae']  
 acteria', u'o\_\_Rhizobiales', u'f\_\_Bradyrhizobiaceae', u'g\_\_', u's\_\_']  
 :lostridiales', u'f\_\_Lachnospiraceae']  
 >bacillales', u'f\_\_Streptococcaceae', u'g\_\_Streptococcus', u's\_\_']  
 :lostridiales', u'f\_\_Clostridiaceae', u'g\_\_Clostridium', u's\_\_']  
 acteria', u'o\_\_Burkholderiales', u'f\_\_Comamonadaceae', u'g\_\_Delftia', u's\_\_']  
 i', u'o\_\_Actinomycetales', u'f\_\_Corynebacteriaceae', u'g\_\_Corynebacterium', u's\_\_']  
 acteria', u'o\_\_Rhizobiales', u'f\_\_Phyllobacteriaceae', u'g\_\_Phyllobacterium', u's\_\_']  
 >bacteria', u'o\_\_Enterobacteriales', u'f\_\_Enterobacteriaceae', u'g\_\_', u's\_\_']  
 :lostridiales', u'f\_\_Veillonellaceae', u'g\_\_Veillonella', u's\_\_dispar']  
 >bacillales', u'f\_\_Streptococcaceae', u'g\_\_Streptococcus', u's\_\_']  
 acteria', u'o\_\_Rhodobacterales', u'f\_\_Rhodobacteraceae', u'g\_\_Paracoccus', u's\_\_']  
 >bacteria', u'o\_\_Enterobacteriales', u'f\_\_Enterobacteriaceae', u'g\_\_', u's\_\_']  
 >bacteria', u'o\_\_Pseudomonadales', u'f\_\_Pseudomonadaceae', u'g\_\_Pseudomonas', u's\_\_']  
 :lostridiales', u'f\_\_Clostridiaceae', u'g\_\_', u's\_\_']  
 'o\_\_Bacteroidales', u'f\_\_Bacteroidaceae', u'g\_\_Bacteroides', u's\_\_']  
 acteria', u'o\_\_Burkholderiales', u'f\_\_Comamonadaceae', u'g\_\_Comamonas', u's\_\_']  
 >bacillales', u'f\_\_Streptococcaceae', u'g\_\_Streptococcus', u's\_\_']  
 :lostridiales', u'f\_\_Lachnospiraceae', u'g\_\_[Ruminococcus]', u's\_\_']  
 :lostridiales', u'f\_\_Lachnospiraceae', u'g\_\_Coprococcus', u's\_\_']  
 >bacteria', u'o\_\_Enterobacteriales', u'f\_\_Enterobacteriaceae', u'g\_\_', u's\_\_']  
 :lostridiales', u'f\_\_Clostridiaceae', u'g\_\_', u's\_\_']  
 >bacteria', u'o\_\_Pseudomonadales', u'f\_\_Pseudomonadaceae', u'g\_\_Pseudomonas', u's\_\_']  
 >bacteria', u'o\_\_Pseudomonadales', u'f\_\_Pseudomonadaceae', u'g\_\_Pseudomonas', u's\_\_']  
 lales', u'f\_\_Staphylococcaceae', u'g\_\_Staphylococcus']  
 >bacillales', u'f\_\_Streptococcaceae', u'g\_\_Streptococcus', u's\_\_']  
 acteria', u'o\_\_Burkholderiales', u'f\_\_Comamonadaceae']  
 >bacteria', u'o\_\_Enterobacteriales', u'f\_\_Enterobacteriaceae', u'g\_\_', u's\_\_']  
 :lostridiales', u'f\_\_Lachnospiraceae', u'g\_\_', u's\_\_']  
 >bacillales', u'f\_\_Streptococcaceae', u'g\_\_Streptococcus', u's\_\_']  
 'o\_\_Bacteroidales', u'f\_\_Porphyromonadaceae', u'g\_\_Parabacteroides', u's\_\_']  
 :lostridiales', u'f\_\_Ruminococcaceae', u'g\_\_', u's\_\_']  
 >bacillales', u'f\_\_Lactobacillaceae', u'g\_\_Lactobacillus', u's\_\_']  
 :lostridiales', u'f\_\_Lachnospiraceae', u'g\_\_Lachnospira', u's\_\_']  
 acteria', u'o\_\_Burkholderiales', u'f\_\_Comamonadaceae', u'g\_\_', u's\_\_']  
 :lostridiales', u'f\_\_Veillonellaceae', u'g\_\_Megasphaera', u's\_\_']  
 i', u'o\_\_Actinomycetales', u'f\_\_Nocardoidaceae', u'g\_\_', u's\_\_']  
 'o\_\_Bacteroidales', u'f\_\_Bacteroidaceae', u'g\_\_Bacteroides', u's\_\_']  
 >bacteria', u'o\_\_Pasteurellales', u'f\_\_Pasteurellaceae', u'g\_\_Haemophilus', u's\_\_']

>bacteria', u'o\_\_Pseudomonadales', u'f\_\_Moraxellaceae', u'g\_\_Moraxella', u's\_\_]  
 lales', u'f\_\_Planococcaceae', u'g\_\_', u's\_\_']  
 i', u'o\_\_Actinomycetales', u'f\_\_Corynebacteriaceae', u'g\_\_Corynebacterium', u's\_\_']  
 'o\_\_Bacteroidales', u'f\_\_Bacteroidaceae', u'g\_\_Bacteroides', u's\_\_uniformis']  
 :lostridiales', u'f\_\_Ruminococcaceae', u'g\_\_', u's\_\_']  
 :lostridiales', u'f\_\_Ruminococcaceae', u'g\_\_', u's\_\_']  
 :lostridiales', u'f\_\_Lachnospiraceae', u'g\_\_Blautia', u's\_\_']  
 i', u'o\_\_Actinomycetales', u'f\_\_Intrasporangiaceae', u'g\_\_Janibacter', u's\_\_']  
 >bacteria', u'o\_\_Enterobacteriales', u'f\_\_Enterobacteriaceae', u'g\_\_', u's\_\_']  
 acteria', u'o\_\_Rhodobacterales', u'f\_\_Rhodobacteraceae', u'g\_\_Paracoccus', u's\_\_']  
 >bacillales', u'f\_\_Enterococcaceae', u'g\_\_Enterococcus', u's\_\_']  
 i', u'o\_\_Actinomycetales', u'f\_\_Corynebacteriaceae', u'g\_\_Corynebacterium', u's\_\_']  
 :lostridiales', u'f\_\_Lachnospiraceae', u'g\_\_', u's\_\_']  
 'o\_\_Bacteroidales', u'f\_\_Bacteroidaceae', u'g\_\_Bacteroides', u's\_\_']  
 >bacteria', u'o\_\_Pasteurellales', u'f\_\_Pasteurellaceae', u'g\_\_Haemophilus', u's\_\_']  
 :lostridiales', u'f\_\_Lachnospiraceae', u'g\_\_Dorea', u's\_\_']  
 >bacteria', u'o\_\_Enterobacteriales', u'f\_\_Enterobacteriaceae', u'g\_\_', u's\_\_']  
 :lostridiales']  
 :lostridiales', u'f\_\_Ruminococcaceae', u'g\_\_', u's\_\_']  
 >bacteria', u'o\_\_Pseudomonadales', u'f\_\_Moraxellaceae', u'g\_\_Acinetobacter', u's\_\_']  
 'o\_\_Bacteroidales', u'f\_\_Bacteroidaceae', u'g\_\_Bacteroides', u's\_\_']  
 >bacillales', u'f\_\_Streptococcaceae', u'g\_\_Streptococcus', u's\_\_']  
 >bacillales', u'f\_\_Aerococcaceae', u'g\_\_Alloiococcus', u's\_\_']  
 'o\_\_Bacteroidales', u'f\_\_[Paraprevotellaceae]', u'g\_\_[Prevotella]', u's\_\_']  
 i', u'o\_\_Actinomycetales', u'f\_\_Nocardoidaceae', u'g\_\_', u's\_\_']  
 :lostridiales', u'f\_\_Clostridiaceae', u'g\_\_Clostridium', u's\_\_neonatale']  
 >bacillales', u'f\_\_Streptococcaceae', u'g\_\_Streptococcus', u's\_\_']  
 >bacteria', u'o\_\_Enterobacteriales', u'f\_\_Enterobacteriaceae', u'g\_\_', u's\_\_']  
 :lostridiales', u'f\_\_Lachnospiraceae', u'g\_\_Dorea', u's\_\_']  
 >bacteria', u'o\_\_Enterobacteriales', u'f\_\_Enterobacteriaceae', u'g\_\_', u's\_\_']  
 i', u'o\_\_Actinomycetales', u'f\_\_Corynebacteriaceae', u'g\_\_Corynebacterium', u's\_\_']  
 :lostridiales', u'f\_\_Lachnospiraceae', u'g\_\_[Ruminococcus]', u's\_\_gnavus']  
 :lostridiales', u'f\_\_Lachnospiraceae', u'g\_\_', u's\_\_']  
 :lostridiales', u'f\_\_Veillonellaceae', u'g\_\_Megasphaera', u's\_\_']  
 cteria', u'o\_\_Burkholderiales', u'f\_\_Oxalobacteraceae', u'g\_\_', u's\_\_']  
 :lostridiales', u'f\_\_Lachnospiraceae', u'g\_\_', u's\_\_']  
 >bacillales', u'f\_\_Streptococcaceae', u'g\_\_Streptococcus', u's\_\_']  
 i', u'o\_\_Actinomycetales', u'f\_\_Propionibacteriaceae', u'g\_\_Propionibacterium', u's\_\_acnes']  
 i', u'o\_\_Actinomycetales', u'f\_\_Actinomycetaceae', u'g\_\_Actinomyces', u's\_\_']  
 :lostridiales', u'f\_\_[Tissierellaceae]', u'g\_\_Anaerococcus', u's\_\_']  
 >bacteria', u'o\_\_Pseudomonadales', u'f\_\_Pseudomonadaceae', u'g\_\_Pseudomonas', u's\_\_']  
 lales', u'f\_\_Staphylococcaceae', u'g\_\_Staphylococcus', u's\_\_']  
 >bacillales', u'f\_\_Carnobacteriaceae', u'g\_\_Granulicatella', u's\_\_']  
 :lostridiales', u'f\_\_Clostridiaceae', u'g\_\_', u's\_\_']  
 'o\_\_Bacteroidales', u'f\_\_Bacteroidaceae', u'g\_\_Bacteroides', u's\_\_']  
 cteria', u'o\_\_Burkholderiales', u'f\_\_Comamonadaceae', u'g\_\_', u's\_\_']  
 'o\_\_Bacteroidales', u'f\_\_[Barnesiellaceae]', u'g\_\_', u's\_\_']  
 >bacteria', u'o\_\_Pasteurellales', u'f\_\_Pasteurellaceae', u'g\_\_Haemophilus', u's\_\_influenzae']  
 >bacteria', u'o\_\_Xanthomonadales', u'f\_\_Xanthomonadaceae', u'g\_\_Lysobacter', u's\_\_']  
 :lostridiales', u'f\_\_Veillonellaceae', u'g\_\_Veillonella', u's\_\_dispar']  
 :lostridiales', u'f\_\_Clostridiaceae', u'g\_\_', u's\_\_']  
 :lostridiales', u'f\_\_Clostridiaceae', u'g\_\_', u's\_\_']  
 >bacteria', u'o\_\_Pseudomonadales', u'f\_\_Pseudomonadaceae', u'g\_\_Pseudomonas', u's\_\_stutzeri']  
 cteria', u'o\_\_Burkholderiales', u'f\_\_Oxalobacteraceae', u'g\_\_', u's\_\_']  
 :lostridiales', u'f\_\_Clostridiaceae', u'g\_\_Clostridium']  
 >bacillales', u'f\_\_Streptococcaceae', u'g\_\_Streptococcus', u's\_\_']

>bacteria', u'o\_\_Pseudomonadales', u'f\_\_Moraxellaceae', u'g\_\_Acinetobacter', u's\_\_']  
 :lostridiales', u'f\_\_Ruminococcaceae', u'g\_\_Oscillospira', u's\_\_']  
 :lostridiales', u'f\_\_Ruminococcaceae', u'g\_\_Faecalibacterium', u's\_\_prausnitzii']  
 :lostridiales', u'f\_\_Lachnospiraceae', u'g\_\_Blautia', u's\_\_']  
 >bacillales', u'f\_\_Enterococcaceae', u'g\_\_Enterococcus', u's\_\_']  
 :lostridiales', u'f\_\_Clostridiaceae', u'g\_\_', u's\_\_']  
 :lostridiales', u'f\_\_Ruminococcaceae', u'g\_\_', u's\_\_']  
 acteria', u'o\_\_Rhizobiales', u'f\_\_Rhizobiaceae', u'g\_\_Agrobacterium', u's\_\_']  
 :lostridiales', u'f\_\_Lachnospiraceae', u'g\_\_Blautia', u's\_\_']  
 :lostridiales', u'f\_\_Clostridiaceae', u'g\_\_', u's\_\_']  
 :lostridiales', u'f\_\_Lachnospiraceae', u'g\_\_Blautia', u's\_\_']  
 >bacillales', u'f\_\_Enterococcaceae', u'g\_\_Enterococcus', u's\_\_']  
 >bacillales', u'f\_\_Streptococcaceae', u'g\_\_Streptococcus', u's\_\_']  
 :lostridiales', u'f\_\_[Tissierellaceae]', u'g\_\_Anaerococcus', u's\_\_']  
 :lostridiales', u'f\_\_Lachnospiraceae', u'g\_\_Blautia', u's\_\_']  
 i', u'o\_\_Actinomycetales', u'f\_\_', u'g\_\_', u's\_\_']  
 :lostridiales', u'f\_\_Lachnospiraceae', u'g\_\_Blautia', u's\_\_']  
 :lostridiales', u'f\_\_Lachnospiraceae', u'g\_\_Blautia', u's\_\_producta']  
 :lostridiales', u'f\_\_Ruminococcaceae', u'g\_\_Faecalibacterium', u's\_\_prausnitzii']  
 >bacteria', u'o\_\_Pseudomonadales', u'f\_\_Pseudomonadaceae', u'g\_\_Pseudomonas', u's\_\_citronellolis']  
 :lostridiales', u'f\_\_Veillonellaceae', u'g\_\_Megasphaera', u's\_\_']  
 >bacteria', u'o\_\_Enterobacteriales', u'f\_\_Enterobacteriaceae', u'g\_\_', u's\_\_']  
 :lostridiales', u'f\_\_Clostridiaceae', u'g\_\_Clostridium', u's\_\_']  
 i', u'o\_\_Actinomycetales', u'f\_\_Corynebacteriaceae', u'g\_\_Corynebacterium', u's\_\_']  
 >bacillales', u'f\_\_Streptococcaceae', u'g\_\_Streptococcus', u's\_\_']  
 i', u'o\_\_Actinomycetales', u'f\_\_Corynebacteriaceae', u'g\_\_Corynebacterium', u's\_\_']  
 i', u'o\_\_Actinomycetales', u'f\_\_Corynebacteriaceae', u'g\_\_Corynebacterium', u's\_\_']  
 :lostridiales', u'f\_\_Ruminococcaceae', u'g\_\_', u's\_\_']  
 :lostridiales', u'f\_\_Clostridiaceae', u'g\_\_', u's\_\_']  
 >bacteria', u'o\_\_Enterobacteriales', u'f\_\_Enterobacteriaceae', u'g\_\_', u's\_\_']  
 :lostridiales', u'f\_\_Clostridiaceae']  
 :lostridiales', u'f\_\_Clostridiaceae', u'g\_\_', u's\_\_']  
 :lostridiales', u'f\_\_Ruminococcaceae', u'g\_\_Oscillospira', u's\_\_']  
 >bacillales', u'f\_\_Streptococcaceae', u'g\_\_Streptococcus', u's\_\_']  
 >bacillales', u'f\_\_Streptococcaceae', u'g\_\_Streptococcus', u's\_\_']  
 >bacillales', u'f\_\_Streptococcaceae', u'g\_\_Streptococcus', u's\_\_']  
 :lostridiales', u'f\_\_Ruminococcaceae', u'g\_\_Faecalibacterium', u's\_\_prausnitzii']  
 lales', u'f\_\_Staphylococcaceae', u'g\_\_Staphylococcus']  
 i', u'o\_\_Bifidobacteriales', u'f\_\_Bifidobacteriaceae', u'g\_\_Bifidobacterium']  
 u'o\_\_Fusobacteriales', u'f\_\_Leptotrichiaceae', u'g\_\_Leptotrichia', u's\_\_']  
 >bacteria', u'o\_\_Pasteurellales', u'f\_\_Pasteurellaceae', u'g\_\_Actinobacillus', u's\_\_porcinus']  
 'o\_\_Bacteroidales', u'f\_\_Bacteroidaceae', u'g\_\_Bacteroides', u's\_\_']  
 >bacteria', u'o\_\_Enterobacteriales', u'f\_\_Enterobacteriaceae']  
 'o\_\_Bacteroidales', u'f\_\_Bacteroidaceae', u'g\_\_Bacteroides', u's\_\_']  
 lales', u'f\_\_Staphylococcaceae', u'g\_\_Staphylococcus', u's\_\_']  
 >bacteria', u'o\_\_Enterobacteriales', u'f\_\_Enterobacteriaceae', u'g\_\_', u's\_\_']  
 i', u'o\_\_Actinomycetales', u'f\_\_Micrococcaceae', u'g\_\_Rothia', u's\_\_mucilaginoso']  
 >bacteria', u'o\_\_Enterobacteriales', u'f\_\_Enterobacteriaceae', u'g\_\_', u's\_\_']  
 'o\_\_Bacteroidales', u'f\_\_Bacteroidaceae', u'g\_\_Bacteroides', u's\_\_uniformis']  
 i', u'o\_\_Bifidobacteriales', u'f\_\_Bifidobacteriaceae', u'g\_\_Bifidobacterium']  
 'o\_\_Bacteroidales', u'f\_\_Bacteroidaceae', u'g\_\_Bacteroides', u's\_\_']  
 :lostridiales', u'f\_\_Ruminococcaceae', u'g\_\_Ruminococcus', u's\_\_']  
 ', u'o\_\_Coriobacteriales', u'f\_\_Coriobacteriaceae', u'g\_\_', u's\_\_']  
 lales', u'f\_\_Staphylococcaceae', u'g\_\_Staphylococcus', u's\_\_']  
 :lostridiales', u'f\_\_Lachnospiraceae', u'g\_\_[Ruminococcus]', u's\_\_gnavus']  
 :lostridiales', u'f\_\_Lachnospiraceae', u'g\_\_[Ruminococcus]', u's\_\_gnavus']

obacteria', u'o\_\_Enterobacteriales', u'f\_\_Enterobacteriaceae', u'g\_\_', u's\_\_']  
 obacteria', u'o\_\_Enterobacteriales', u'f\_\_Enterobacteriaceae', u'g\_\_', u's\_\_']  
 'o\_\_Bacteroidales', u'f\_\_Bacteroidaceae', u'g\_\_Bacteroides', u's\_\_']  
 i', u'o\_\_Bifidobacteriales', u'f\_\_Bifidobacteriaceae', u'g\_\_Bifidobacterium']  
 :lostridiales', u'f\_\_Veillonellaceae', u'g\_\_Veillonella', u's\_\_dispar']  
 acteria', u'o\_\_Rhodobacterales', u'f\_\_Rhodobacteraceae', u'g\_\_Paracoccus', u's\_\_aminovorans']  
 obacillales', u'f\_\_Streptococcaceae', u'g\_\_Streptococcus', u's\_\_']  
 iia', u'o\_\_Sphingobacteriales', u'f\_\_Sphingobacteriaceae', u'g\_\_Sphingobacterium', u's\_\_']  
 :lostridiales', u'f\_\_Veillonellaceae', u'g\_\_Megamonas', u's\_\_']  
 'o\_\_Bacteroidales', u'f\_\_Bacteroidaceae', u'g\_\_Bacteroides', u's\_\_uniformis']  
 obacillales', u'f\_\_Streptococcaceae', u'g\_\_Streptococcus', u's\_\_']  
 cteria', u'o\_\_Burkholderiales', u'f\_\_Alcaligenaceae', u'g\_\_Sutterella', u's\_\_']  
 i', u'o\_\_Actinomycetales', u'f\_\_Corynebacteriaceae', u'g\_\_Corynebacterium', u's\_\_']  
 :lostridiales', u'f\_\_Lachnospiraceae', u'g\_\_Blautia', u's\_\_']  
 obacteria', u'o\_\_Pasteurellales', u'f\_\_Pasteurellaceae', u'g\_\_Haemophilus', u's\_\_']  
 obacteria', u'o\_\_Pasteurellales', u'f\_\_Pasteurellaceae', u'g\_\_Haemophilus', u's\_\_parainfluenzae']  
 :lostridiales', u'f\_\_Clostridiaceae', u'g\_\_', u's\_\_']  
 :lostridiales', u'f\_\_Eubacteriaceae', u'g\_\_Pseudoramibacter\_Eubacterium', u's\_\_']  
 :lostridiales', u'f\_\_Lachnospiraceae', u'g\_\_Blautia', u's\_\_']  
 obacteria', u'o\_\_Enterobacteriales', u'f\_\_Enterobacteriaceae', u'g\_\_Klebsiella', u's\_\_']  
 cteria', u'o\_\_Burkholderiales', u'f\_\_Comamonadaceae', u'g\_\_', u's\_\_']  
 :lostridiales', u'f\_\_', u'g\_\_', u's\_\_']  
 lales', u'f\_\_Staphylococcaceae', u'g\_\_Staphylococcus', u's\_\_']  
 obacteria', u'o\_\_Enterobacteriales', u'f\_\_Enterobacteriaceae', u'g\_\_', u's\_\_']  
 :lostridiales', u'f\_\_Clostridiaceae', u'g\_\_', u's\_\_']  
 obacillales', u'f\_\_Streptococcaceae', u'g\_\_Streptococcus', u's\_\_']  
 :lostridiales', u'f\_\_Clostridiaceae', u'g\_\_', u's\_\_']  
 obacteria', u'o\_\_Pasteurellales', u'f\_\_Pasteurellaceae', u'g\_\_Haemophilus', u's\_\_parainfluenzae']  
 obacteria', u'o\_\_Pseudomonadales', u'f\_\_Pseudomonadaceae', u'g\_\_Pseudomonas', u's\_\_']  
 i', u'o\_\_Actinomycetales', u'f\_\_Cellulomonadaceae', u'g\_\_Actinotalea', u's\_\_']  
 cteria', u'o\_\_Burkholderiales', u'f\_\_Comamonadaceae']  
 :lostridiales', u'f\_\_Veillonellaceae', u'g\_\_Megasphaera', u's\_\_']  
 :lostridiales', u'f\_\_Lachnospiraceae', u'g\_\_Blautia', u's\_\_']  
 :lostridiales', u'f\_\_Lachnospiraceae', u'g\_\_', u's\_\_']  
 obacillales', u'f\_\_Streptococcaceae', u'g\_\_Streptococcus', u's\_\_']  
 obacteria', u'o\_\_Enterobacteriales', u'f\_\_Enterobacteriaceae', u'g\_\_Proteus', u's\_\_']  
 :lostridiales', u'f\_\_Lachnospiraceae', u'g\_\_[Ruminococcus]', u's\_\_gnavus']  
 i', u'o\_\_Actinomycetales', u'f\_\_Micrococcaceae', u'g\_\_Rothia', u's\_\_mucilaginoso']  
 i', u'o\_\_Actinomycetales', u'f\_\_Micrococcaceae', u'g\_\_Microbispora', u's\_\_rosea']  
 obacteria', u'o\_\_Enterobacteriales', u'f\_\_Enterobacteriaceae', u'g\_\_', u's\_\_']  
 'o\_\_Bacteroidales', u'f\_\_Bacteroidaceae', u'g\_\_Bacteroides', u's\_\_']  
 obacillales', u'f\_\_Lactobacillaceae', u'g\_\_Lactobacillus', u's\_\_ruminis']  
 obacteria', u'o\_\_Enterobacteriales', u'f\_\_Enterobacteriaceae']  
 obacteria', u'o\_\_Enterobacteriales', u'f\_\_Enterobacteriaceae', u'g\_\_', u's\_\_']  
 :lostridiales', u'f\_\_Clostridiaceae', u'g\_\_', u's\_\_']  
 :lostridiales', u'f\_\_Lachnospiraceae', u'g\_\_Dorea', u's\_\_']  
 'o\_\_Bacteroidales', u'f\_\_Bacteroidaceae', u'g\_\_Bacteroides', u's\_\_']  
 obacillales', u'f\_\_Lactobacillaceae', u'g\_\_Lactobacillus', u's\_\_']  
 :lostridiales', u'f\_\_', u'g\_\_', u's\_\_']  
 obacteria', u'o\_\_Enterobacteriales', u'f\_\_Enterobacteriaceae', u'g\_\_', u's\_\_']  
 obacteria', u'o\_\_Pasteurellales', u'f\_\_Pasteurellaceae', u'g\_\_Haemophilus', u's\_\_']  
 :lostridiales', u'f\_\_Lachnospiraceae', u'g\_\_', u's\_\_']  
 , u'o\_\_Flavobacteriales', u'f\_\_[Weeksellaceae]', u'g\_\_Wautersiella', u's\_\_']  
 :lostridiales', u'f\_\_Veillonellaceae', u'g\_\_Veillonella', u's\_\_dispar']  
 :lostridiales', u'f\_\_Lachnospiraceae', u'g\_\_', u's\_\_']  
 i', u'o\_\_Bifidobacteriales', u'f\_\_Bifidobacteriaceae', u'g\_\_Bifidobacterium']

cteria', u'o\_\_Burkholderiales', u'f\_\_Alcaligenaceae', u'g\_\_Sutterella', u's\_\_']  
 :lostridiales', u'f\_\_Lachnospiraceae', u'g\_\_Blautia', u's\_\_']  
 i', u'o\_\_Actinomycetales', u'f\_\_Actinomycetaceae', u'g\_\_Actinomyces', u's\_\_']  
 'o\_\_Bacteroidales', u'f\_\_Bacteroidaceae', u'g\_\_Bacteroides', u's\_\_']  
 cteria', u'o\_\_Neisseriales', u'f\_\_Neisseriaceae', u'g\_\_', u's\_\_']  
 obacteria', u'o\_\_Enterobacteriales', u'f\_\_Enterobacteriaceae', u'g\_\_', u's\_\_']  
 obacteria', u'o\_\_Enterobacteriales', u'f\_\_Enterobacteriaceae', u'g\_\_Morganella', u's\_\_morganii']  
 acteria', u'o\_\_Rhodobacterales', u'f\_\_Rhodobacteraceae', u'g\_\_Paracoccus', u's\_\_marcusii']  
 :lostridiales', u'f\_\_', u'g\_\_', u's\_\_']  
 ', u'o\_\_Coriobacteriales', u'f\_\_Coriobacteriaceae', u'g\_\_Collinsella', u's\_\_aerofaciens']  
 ', u'o\_\_Coriobacteriales', u'f\_\_Coriobacteriaceae', u'g\_\_', u's\_\_']  
 i', u'o\_\_Actinomycetales', u'f\_\_Mycobacteriaceae', u'g\_\_Mycobacterium', u's\_\_']  
 :lostridiales', u'f\_\_Lachnospiraceae', u'g\_\_Blautia', u's\_\_']  
 'o\_\_Bacteroidales', u'f\_\_Bacteroidaceae', u'g\_\_Bacteroides', u's\_\_']  
 obacteria', u'o\_\_Enterobacteriales', u'f\_\_Enterobacteriaceae', u'g\_\_', u's\_\_']  
 obacteria', u'o\_\_Enterobacteriales', u'f\_\_Enterobacteriaceae', u'g\_\_', u's\_\_']  
 lales', u'f\_\_Staphylococcaceae', u'g\_\_Staphylococcus']  
 obacillales', u'f\_\_Streptococcaceae', u'g\_\_Streptococcus', u's\_\_']  
 obacillales', u'f\_\_Enterococcaceae', u'g\_\_Enterococcus', u's\_\_']  
 obacillales']  
 acteria', u'o\_\_Rhizobiales']  
 obacteria', u'o\_\_Enterobacteriales', u'f\_\_Enterobacteriaceae', u'g\_\_', u's\_\_']  
 :lostridiales', u'f\_\_Lachnospiraceae', u'g\_\_', u's\_\_']  
 obacteria', u'o\_\_Enterobacteriales', u'f\_\_Enterobacteriaceae', u'g\_\_', u's\_\_']  
 obacteria', u'o\_\_Enterobacteriales', u'f\_\_Enterobacteriaceae', u'g\_\_', u's\_\_']  
 lales']  
 o\_\_Erysipelotrichales', u'f\_\_Erysipelotrichaceae', u'g\_\_', u's\_\_']  
 obacteria', u'o\_\_Enterobacteriales', u'f\_\_Enterobacteriaceae']  
 :lostridiales', u'f\_\_', u'g\_\_', u's\_\_']  
 :lostridiales', u'f\_\_Lachnospiraceae', u'g\_\_Blautia', u's\_\_']  
 ', u'o\_\_Coriobacteriales', u'f\_\_Coriobacteriaceae', u'g\_\_Atopobium', u's\_\_']  
 :lostridiales', u'f\_\_Ruminococcaceae', u'g\_\_Faecalibacterium', u's\_\_prausnitzii']  
 :lostridiales', u'f\_\_Lachnospiraceae']  
 obacillales', u'f\_\_Streptococcaceae', u'g\_\_Streptococcus', u's\_\_']  
 obacteria', u'o\_\_Pasteurellales', u'f\_\_Pasteurellaceae', u'g\_\_Haemophilus', u's\_\_']  
 i', u'o\_\_Actinomycetales', u'f\_\_Corynebacteriaceae', u'g\_\_Corynebacterium', u's\_\_']  
 obacteria', u'o\_\_Enterobacteriales', u'f\_\_Enterobacteriaceae', u'g\_\_Citrobacter', u's\_\_']  
 'o\_\_Bacteroidales', u'f\_\_Bacteroidaceae', u'g\_\_Bacteroides', u's\_\_']  
 obacteria', u'o\_\_Pasteurellales', u'f\_\_Pasteurellaceae', u'g\_\_Haemophilus', u's\_\_influenzae']  
 'o\_\_Bacteroidales', u'f\_\_Bacteroidaceae', u'g\_\_Bacteroides', u's\_\_uniformis']  
 :lostridiales', u'f\_\_Lachnospiraceae', u'g\_\_', u's\_\_']  
 cteria', u'o\_\_Burkholderiales', u'f\_\_Comamonadaceae', u'g\_\_', u's\_\_']  
 cteria', u'o\_\_Neisseriales', u'f\_\_Neisseriaceae', u'g\_\_Neisseria', u's\_\_subflava']  
 i', u'o\_\_Actinomycetales', u'f\_\_Corynebacteriaceae', u'g\_\_Corynebacterium', u's\_\_']  
 obacteria', u'o\_\_Campylobacterales', u'f\_\_Campylobacteraceae', u'g\_\_Campylobacter', u's\_\_']  
 i', u'o\_\_Actinomycetales', u'f\_\_Micrococcaceae', u'g\_\_Rothia', u's\_\_mucilaginoso']  
 acteria', u'o\_\_Sphingomonadales', u'f\_\_Sphingomonadaceae', u'g\_\_Novosphingobium', u's\_\_']  
 :lostridiales', u'f\_\_Ruminococcaceae', u'g\_\_', u's\_\_']  
 :lostridiales', u'f\_\_Veillonellaceae', u'g\_\_Megamonas', u's\_\_']  
 :lostridiales', u'f\_\_Lachnospiraceae', u'g\_\_Blautia', u's\_\_producta']  
 obacillales', u'f\_\_Streptococcaceae', u'g\_\_Lactococcus', u's\_\_']  
 :lostridiales', u'f\_\_Veillonellaceae', u'g\_\_Megasphaera', u's\_\_']  
 :lostridiales', u'f\_\_Veillonellaceae', u'g\_\_Dialister', u's\_\_']  
 lales', u'f\_\_Staphylococcaceae', u'g\_\_Staphylococcus', u's\_\_aureus']  
 :lostridiales', u'f\_\_Lachnospiraceae', u'g\_\_Blautia', u's\_\_producta']  
 :lostridiales', u'f\_\_Lachnospiraceae', u'g\_\_[Ruminococcus]', u's\_\_gnavus']

]bacteria', u'o\_\_Pseudomonadales', u'f\_\_Pseudomonadaceae', u'g\_\_Pseudomonas', u's\_\_']  
 ', u'o\_\_Coriobacteriales', u'f\_\_Coriobacteriaceae', u'g\_\_Collinsella', u's\_\_stercoris']  
 ]bacteria', u'o\_\_Pseudomonadales', u'f\_\_Moraxellaceae', u'g\_\_Moraxella', u's\_\_']  
 ]bacteria', u'o\_\_Enterobacteriales', u'f\_\_Enterobacteriaceae', u'g\_\_', u's\_\_']  
 'o\_\_Bacteroidales', u'f\_\_Bacteroidaceae', u'g\_\_Bacteroides', u's\_\_caccae']  
 ]bacteria', u'o\_\_Enterobacteriales', u'f\_\_Enterobacteriaceae', u'g\_\_Erwinia']  
 'o\_\_Bacteroidales', u'f\_\_Bacteroidaceae', u'g\_\_Bacteroides', u's\_\_']  
 'o\_\_Bacteroidales', u'f\_\_Bacteroidaceae', u'g\_\_Bacteroides', u's\_\_']  
 ]bacillales', u'f\_\_Lactobacillaceae', u'g\_\_Lactobacillus', u's\_\_']  
 'o\_\_Bacteroidales', u'f\_\_Porphyromonadaceae', u'g\_\_Parabacteroides', u's\_\_distasonis']  
 :lostridiales', u'f\_\_Lachnospiraceae', u'g\_\_Blautia', u's\_\_']  
 'o\_\_Bacteroidales', u'f\_\_Porphyromonadaceae', u'g\_\_Parabacteroides', u's\_\_']  
 :lostridiales', u'f\_\_Clostridiaceae', u'g\_\_', u's\_\_']  
 'o\_\_Bacteroidales', u'f\_\_[Barnesiellaceae]', u'g\_\_', u's\_\_']  
 ]bacteria', u'o\_\_Enterobacteriales', u'f\_\_Enterobacteriaceae', u'g\_\_', u's\_\_']  
 cteria', u'o\_\_Burkholderiales', u'f\_\_Comamonadaceae', u'g\_\_', u's\_\_']  
 :lostridiales', u'f\_\_Lachnospiraceae', u'g\_\_Blautia', u's\_\_']  
 ]bacteria', u'o\_\_Enterobacteriales', u'f\_\_Enterobacteriaceae', u'g\_\_', u's\_\_']  
 :lostridiales', u'f\_\_Lachnospiraceae', u'g\_\_Blautia', u's\_\_']  
 ]bacteria', u'o\_\_Enterobacteriales', u'f\_\_Enterobacteriaceae', u'g\_\_', u's\_\_']  
 ]\_\_Erysipelotrichales', u'f\_\_Erysipelotrichaceae', u'g\_\_', u's\_\_']  
 :lostridiales', u'f\_\_Lachnospiraceae', u'g\_\_Blautia', u's\_\_obeum']  
 ]bacteria', u'o\_\_Enterobacteriales', u'f\_\_Enterobacteriaceae', u'g\_\_', u's\_\_']  
 's\_\_']  
 'o\_\_Bacteroidales', u'f\_\_Bacteroidaceae', u'g\_\_Bacteroides', u's\_\_']  
 ]bacteria', u'o\_\_Enterobacteriales', u'f\_\_Enterobacteriaceae', u'g\_\_Proteus', u's\_\_']  
 lales', u'f\_\_Staphylococcaceae', u'g\_\_Staphylococcus']  
 ]bacillales', u'f\_\_Streptococcaceae', u'g\_\_Streptococcus', u's\_\_']  
 :lostridiales', u'f\_\_Clostridiaceae', u'g\_\_', u's\_\_']  
 ]bacteria', u'o\_\_Enterobacteriales', u'f\_\_Enterobacteriaceae', u'g\_\_', u's\_\_']  
 ]bacillales', u'f\_\_Streptococcaceae', u'g\_\_Streptococcus', u's\_\_']  
 :lostridiales', u'f\_\_Lachnospiraceae']  
 :lostridiales', u'f\_\_Ruminococcaceae', u'g\_\_', u's\_\_']  
 :lostridiales', u'f\_\_Lachnospiraceae', u'g\_\_Blautia', u's\_\_producta']  
 :lostridiales', u'f\_\_Veillonellaceae', u'g\_\_Phascolarctobacterium', u's\_\_']  
 :lostridiales', u'f\_\_Lachnospiraceae', u'g\_\_Coprococcus', u's\_\_']  
 ]bacteria', u'o\_\_Enterobacteriales', u'f\_\_Enterobacteriaceae', u'g\_\_', u's\_\_']  
 :lostridiales', u'f\_\_', u'g\_\_', u's\_\_']  
 ]bacillales', u'f\_\_Enterococcaceae', u'g\_\_Enterococcus', u's\_\_']  
 ]bacillales', u'f\_\_Lactobacillaceae', u'g\_\_Lactobacillus', u's\_\_']  
 ]bacillales', u'f\_\_Streptococcaceae', u'g\_\_Streptococcus', u's\_\_']  
 :lostridiales', u'f\_\_Lachnospiraceae', u'g\_\_Dorea', u's\_\_']  
 i', u'o\_\_Actinomycetales', u'f\_\_Micrococcaceae', u'g\_\_Micrococcus', u's\_\_']  
  
 cteria', u'o\_\_Burkholderiales', u'f\_\_Comamonadaceae', u'g\_\_', u's\_\_']  
 ]bacillales', u'f\_\_Lactobacillaceae', u'g\_\_Lactobacillus', u's\_\_zeae']  
 :lostridiales', u'f\_\_Ruminococcaceae', u'g\_\_Faecalibacterium', u's\_\_prausnitzii']  
 ', u'o\_\_Coriobacteriales', u'f\_\_Coriobacteriaceae', u'g\_\_Eggerthella', u's\_\_lenta']  
 'o\_\_Bacteroidales', u'f\_\_Bacteroidaceae', u'g\_\_Bacteroides', u's\_\_']  
 :lostridiales', u'f\_\_Lachnospiraceae', u'g\_\_', u's\_\_']  
 :lostridiales', u'f\_\_Lachnospiraceae', u'g\_\_', u's\_\_']  
 :lostridiales', u'f\_\_Lachnospiraceae', u'g\_\_Blautia', u's\_\_']  
 :lostridiales', u'f\_\_Lachnospiraceae', u'g\_\_Lachnospira', u's\_\_']  
 :lostridiales', u'f\_\_Lachnospiraceae', u'g\_\_', u's\_\_']  
 ]bacteria', u'o\_\_Pseudomonadales', u'f\_\_Pseudomonadaceae', u'g\_\_Pseudomonas', u's\_\_']  
 :lostridiales', u'f\_\_', u'g\_\_', u's\_\_']

:lostridiales', u'f\_\_Veillonellaceae', u'g\_\_Megamonas', u's\_\_']  
 obacteria', u'o\_\_Xanthomonadales', u'f\_\_Xanthomonadaceae', u'g\_\_', u's\_\_']  
 obacillales', u'f\_\_Lactobacillaceae', u'g\_\_Lactobacillus', u's\_\_']  
 cteria', u'o\_\_Burkholderiales', u'f\_\_Comamonadaceae', u'g\_\_', u's\_\_']  
 i', u'o\_\_Bifidobacteriales', u'f\_\_Bifidobacteriaceae', u'g\_\_Bifidobacterium']  
 'o\_\_Bacteroidales', u'f\_\_Porphyromonadaceae', u'g\_\_Dysgonomonas', u's\_\_']  
 cteria', u'o\_\_Burkholderiales', u'f\_\_Burkholderiaceae', u'g\_\_Lautropia', u's\_\_']  
 'o\_\_Bacteroidales', u'f\_\_Bacteroidaceae', u'g\_\_Bacteroides', u's\_\_']  
 i', u'o\_\_Actinomycetales', u'f\_\_Corynebacteriaceae', u'g\_\_Corynebacterium', u's\_\_']  
 :lostridiales', u'f\_\_Clostridiaceae', u'g\_\_', u's\_\_']  
 obacteria', u'o\_\_Pseudomonadales']  
 'o\_\_Bacteroidales', u'f\_\_Bacteroidaceae', u'g\_\_Bacteroides', u's\_\_']  
 :lostridiales', u'f\_\_Lachnospiraceae', u'g\_\_Blautia', u's\_\_']  
 i', u'o\_\_Actinomycetales', u'f\_\_Nocardoidaceae', u'g\_\_', u's\_\_']  
 i', u'o\_\_Actinomycetales', u'f\_\_Corynebacteriaceae', u'g\_\_Corynebacterium', u's\_\_']  
 obacillales', u'f\_\_Aerococcaceae', u'g\_\_Alloiococcus', u's\_\_']  
 obacteria', u'o\_\_Enterobacteriales', u'f\_\_Enterobacteriaceae', u'g\_\_', u's\_\_']  
 :lostridiales', u'f\_\_Veillonellaceae', u'g\_\_Dialister', u's\_\_']  
 :lostridiales', u'f\_\_Lachnospiraceae', u'g\_\_Dorea', u's\_\_']  
 i', u'o\_\_Actinomycetales', u'f\_\_Corynebacteriaceae', u'g\_\_Corynebacterium', u's\_\_']  
 :lostridiales', u'f\_\_Lachnospiraceae', u'g\_\_', u's\_\_']  
 'o\_\_Bacteroidales', u'f\_\_Bacteroidaceae', u'g\_\_Bacteroides', u's\_\_fragilis']  
 obacillales', u'f\_\_Streptococcaceae', u'g\_\_Streptococcus', u's\_\_']  
 ', u'o\_\_Coriobacteriales', u'f\_\_Coriobacteriaceae', u'g\_\_Collinsella', u's\_\_aerofaciens']  
 :lostridiales', u'f\_\_Ruminococcaceae', u'g\_\_Oscillospira', u's\_\_']  
 :lostridiales', u'f\_\_Veillonellaceae', u'g\_\_Veillonella', u's\_\_']  
 obacteria', u'o\_\_Pasteurellales', u'f\_\_Pasteurellaceae', u'g\_\_Haemophilus', u's\_\_influenzae']  
 obacteria', u'o\_\_Enterobacteriales', u'f\_\_Enterobacteriaceae', u'g\_\_', u's\_\_']  
 'o\_\_Bacteroidales', u'f\_\_Bacteroidaceae', u'g\_\_Bacteroides', u's\_\_']  
 ', u'o\_\_Coriobacteriales', u'f\_\_Coriobacteriaceae', u'g\_\_Collinsella', u's\_\_aerofaciens']  
 :lostridiales', u'f\_\_Lachnospiraceae', u'g\_\_Roseburia']  
 :lostridiales', u'f\_\_Lachnospiraceae', u'g\_\_Blautia', u's\_\_']  
 obacteria', u'o\_\_Enterobacteriales', u'f\_\_Enterobacteriaceae', u'g\_\_', u's\_\_']  
 obacteria', u'o\_\_Pseudomonadales', u'f\_\_Moraxellaceae', u'g\_\_Moraxella', u's\_\_']  
 obacteria', u'o\_\_Enterobacteriales', u'f\_\_Enterobacteriaceae', u'g\_\_', u's\_\_']  
 :lostridiales', u'f\_\_Lachnospiraceae', u'g\_\_Blautia', u's\_\_']  
 :lostridiales', u'f\_\_Lachnospiraceae', u'g\_\_Blautia', u's\_\_']  
 i', u'o\_\_Bifidobacteriales', u'f\_\_Bifidobacteriaceae', u'g\_\_Bifidobacterium']  
 u'o\_\_Fusobacteriales', u'f\_\_Leptotrichiaceae', u'g\_\_Leptotrichia', u's\_\_']  
 :lostridiales', u'f\_\_Veillonellaceae', u'g\_\_Veillonella', u's\_\_dispar']  
 'o\_\_Bacteroidales', u'f\_\_Bacteroidaceae', u'g\_\_Bacteroides', u's\_\_']  
 :lostridiales', u'f\_\_Lachnospiraceae', u'g\_\_Blautia', u's\_\_']  
 obacteria', u'o\_\_Pseudomonadales', u'f\_\_Moraxellaceae', u'g\_\_Acinetobacter', u's\_\_']  
 obacillales', u'f\_\_Enterococcaceae', u'g\_\_Enterococcus', u's\_\_casseliflavus']  
 cteria', u'o\_\_Burkholderiales', u'f\_\_Oxalobacteraceae', u'g\_\_', u's\_\_']  
 acteria', u'o\_\_Sphingomonadales', u'f\_\_Sphingomonadaceae', u'g\_\_Novosphingobium', u's\_\_']  
 obacillales', u'f\_\_Streptococcaceae', u'g\_\_Streptococcus', u's\_\_']  
 obacillales', u'f\_\_Carnobacteriaceae', u'g\_\_Granulicatella', u's\_\_']  
 :lostridiales', u'f\_\_Clostridiaceae', u'g\_\_', u's\_\_']  
 :lostridiales', u'f\_\_[Tissierellaceae]', u'g\_\_Anaerococcus', u's\_\_']  
 cteria', u'o\_\_Burkholderiales', u'f\_\_Alcaligenaceae', u'g\_\_Achromobacter', u's\_\_']  
 :lostridiales', u'f\_\_Lachnospiraceae', u'g\_\_Dorea', u's\_\_']  
 obacteria', u'o\_\_Enterobacteriales', u'f\_\_Enterobacteriaceae', u'g\_\_', u's\_\_']  
 i', u'o\_\_Actinomycetales', u'f\_\_Streptomyetaceae', u'g\_\_', u's\_\_']  
 obacteria', u'o\_\_Enterobacteriales', u'f\_\_Enterobacteriaceae', u'g\_\_', u's\_\_']  
 i', u'o\_\_Actinomycetales', u'f\_\_Micrococcaceae', u'g\_\_Rothia', u's\_\_mucilaginoso']



:bacteria', u'o\_\_Enterobacteriales', u'f\_\_Enterobacteriaceae', u'g\_\_Klebsiella', u's\_\_']  
 i', u'o\_\_Actinomycetales', u'f\_\_Corynebacteriaceae', u'g\_\_Corynebacterium', u's\_\_']  
 :\_\_Erysipelotrichales', u'f\_\_Erysipelotrichaceae', u'g\_\_[Eubacterium]', u's\_\_dolichum']  
 ', u'o\_\_Coriobacteriales', u'f\_\_Coriobacteriaceae', u'g\_\_Eggerthella', u's\_\_lenta']  
 'o\_\_Bacteroidales', u'f\_\_Bacteroidaceae', u'g\_\_Bacteroides', u's\_\_']  
 :lostridiales', u'f\_\_Clostridiaceae', u'g\_\_', u's\_\_']  
 :lostridiales', u'f\_\_Lachnospiraceae', u'g\_\_[Ruminococcus]', u's\_\_gnavus']  
 :bacillales', u'f\_\_Streptococcaceae', u'g\_\_Streptococcus', u's\_\_']  
 :lostridiales', u'f\_\_Clostridiaceae', u'g\_\_', u's\_\_']  
 i', u'o\_\_Actinomycetales', u'f\_\_', u'g\_\_', u's\_\_']  
 i', u'o\_\_Actinomycetales', u'f\_\_Corynebacteriaceae', u'g\_\_Corynebacterium', u's\_\_']  
 :lostridiales', u'f\_\_Lachnospiraceae', u'g\_\_[Ruminococcus]', u's\_\_']  
 'o\_\_Bacteroidales', u'f\_\_[Barnesiellaceae]', u'g\_\_', u's\_\_']  
 'o\_\_Bacteroidales', u'f\_\_Porphyromonadaceae', u'g\_\_Porphyromonas', u's\_\_']  
 :bacteria', u'o\_\_Pseudomonadales', u'f\_\_Pseudomonadaceae', u'g\_\_Pseudomonas', u's\_\_stutzeri']  
 i', u'o\_\_Bifidobacteriales', u'f\_\_Bifidobacteriaceae', u'g\_\_Bifidobacterium']  
 :lostridiales', u'f\_\_Clostridiaceae', u'g\_\_', u's\_\_']  
 :lostridiales', u'f\_\_Lachnospiraceae', u'g\_\_Epulopiscium', u's\_\_']  
 'o\_\_Bacteroidales', u'f\_\_', u'g\_\_', u's\_\_']  
 :lostridiales', u'f\_\_Lachnospiraceae', u'g\_\_Roseburia']  
 :acteria', u'o\_\_Rhizobiales', u'f\_\_Methylobacteriaceae', u'g\_\_', u's\_\_']  
 :lostridiales', u'f\_\_Ruminococcaceae', u'g\_\_', u's\_\_']  
 :bacteria', u'o\_\_Enterobacteriales', u'f\_\_Enterobacteriaceae', u'g\_\_', u's\_\_']  
 :bacillales', u'f\_\_Streptococcaceae', u'g\_\_Lactococcus', u's\_\_']  
 i', u'o\_\_Actinomycetales', u'f\_\_Corynebacteriaceae', u'g\_\_Corynebacterium', u's\_\_']  
 :lostridiales', u'f\_\_Ruminococcaceae', u'g\_\_Ruminococcus', u's\_\_']  
 'o\_\_Bacteroidales', u'f\_\_Bacteroidaceae', u'g\_\_Bacteroides', u's\_\_']  
 :lostridiales', u'f\_\_Lachnospiraceae', u'g\_\_Blautia', u's\_\_producta']  
 :lales', u'f\_\_Staphylococcaceae', u'g\_\_Staphylococcus']  
 :lostridiales', u'f\_\_Lachnospiraceae']  
 'o\_\_Bacteroidales', u'f\_\_Bacteroidaceae', u'g\_\_Bacteroides', u's\_\_uniformis']  
 i', u'o\_\_Actinomycetales', u'f\_\_Corynebacteriaceae', u'g\_\_Corynebacterium', u's\_\_']  
 'o\_\_Bacteroidales', u'f\_\_Prevotellaceae', u'g\_\_Prevotella', u's\_\_copri']  
 :lostridiales', u'f\_\_Lachnospiraceae', u'g\_\_Blautia', u's\_\_']  
 :lostridiales', u'f\_\_', u'g\_\_', u's\_\_']  
 :bacillales', u'f\_\_Streptococcaceae', u'g\_\_Streptococcus', u's\_\_']  
 :bacteria', u'o\_\_Campylobacteriales', u'f\_\_Campylobacteriaceae', u'g\_\_Campylobacter', u's\_\_']  
 :bacillales', u'f\_\_Lactobacillaceae', u'g\_\_Lactobacillus', u's\_\_zeae']  
 :lostridiales', u'f\_\_Lachnospiraceae', u'g\_\_', u's\_\_']  
 i', u'o\_\_Actinomycetales', u'f\_\_Corynebacteriaceae', u'g\_\_Corynebacterium', u's\_\_']  
 :lostridiales', u'f\_\_Veillonellaceae', u'g\_\_Veillonella', u's\_\_dispar']  
 :lostridiales', u'f\_\_Lachnospiraceae', u'g\_\_', u's\_\_']  
 i', u'o\_\_Actinomycetales', u'f\_\_Actinomycetaceae', u'g\_\_Actinomyces', u's\_\_']  
 :lostridiales', u'f\_\_Ruminococcaceae', u'g\_\_', u's\_\_']  
 :bacteria', u'o\_\_Enterobacteriales', u'f\_\_Enterobacteriaceae', u'g\_\_Klebsiella', u's\_\_']  
 :lostridiales', u'f\_\_Lachnospiraceae', u'g\_\_Blautia', u's\_\_']  
 'o\_\_Bacteroidales', u'f\_\_Porphyromonadaceae', u'g\_\_Parabacteroides', u's\_\_distasonis']  
 i', u'o\_\_Actinomycetales', u'f\_\_Corynebacteriaceae', u'g\_\_Corynebacterium', u's\_\_']  
 'o\_\_Bacteroidales', u'f\_\_Bacteroidaceae', u'g\_\_Bacteroides', u's\_\_']  
 :lostridiales', u'f\_\_Lachnospiraceae', u'g\_\_', u's\_\_']  
 :bacillales', u'f\_\_Aerococcaceae', u'g\_\_Alloiococcus', u's\_\_']  
 :bacillales', u'f\_\_Streptococcaceae', u'g\_\_Streptococcus', u's\_\_']  
 :lales', u'f\_\_Bacillaceae', u'g\_\_Bacillus', u's\_\_']  
 :lostridiales', u'f\_\_Lachnospiraceae', u'g\_\_[Ruminococcus]', u's\_\_gnavus']  
 :lostridiales', u'f\_\_Clostridiaceae', u'g\_\_', u's\_\_']  
 i', u'o\_\_Actinomycetales', u'f\_\_Corynebacteriaceae', u'g\_\_Corynebacterium', u's\_\_']

:lostridiales', u'f\_\_Lachnospiraceae', u'g\_\_', u's\_\_']  
 'o\_\_Bacteroidales', u'f\_\_Bacteroidaceae', u'g\_\_Bacteroides', u's\_\_']  
 :lostridiales', u'f\_\_Lachnospiraceae', u'g\_\_', u's\_\_']  
 'o\_\_Bacteroidales', u'f\_\_Bacteroidaceae', u'g\_\_Bacteroides', u's\_\_']  
 :lostridiales', u'f\_\_Lachnospiraceae', u'g\_\_Dorea', u's\_\_']  
 :lostridiales', u'f\_\_Lachnospiraceae', u'g\_\_Blautia', u's\_\_producta']  
 :lostridiales', u'f\_\_Lachnospiraceae', u'g\_\_', u's\_\_']  
 lales']  
 :lostridiales', u'f\_\_Lachnospiraceae', u'g\_\_Blautia', u's\_\_']  
 :lostridiales', u'f\_\_Peptostreptococcaceae', u'g\_\_', u's\_\_']  
 :lostridiales', u'f\_\_Lachnospiraceae', u'g\_\_Coprococcus', u's\_\_']  
 >bacillales', u'f\_\_Lactobacillaceae', u'g\_\_Lactobacillus', u's\_\_']  
 'o\_\_Bacteroidales', u'f\_\_[Paraprevotellaceae]', u'g\_\_[Prevotella]', u's\_\_']  
 :lostridiales', u'f\_\_Lachnospiraceae', u'g\_\_Blautia', u's\_\_']  
 :lostridiales', u'f\_\_Ruminococcaceae', u'g\_\_Ruminococcus', u's\_\_']  
 >bacillales', u'f\_\_Lactobacillaceae', u'g\_\_Lactobacillus', u's\_\_']  
 :lostridiales', u'f\_\_Lachnospiraceae', u'g\_\_Coprococcus', u's\_\_']  
 :lostridiales', u'f\_\_Veillonellaceae', u'g\_\_Veillonella', u's\_\_dispar']  
 >bacillales', u'f\_\_Streptococcaceae', u'g\_\_Streptococcus', u's\_\_']  
 >bacteria', u'o\_\_Enterobacteriales', u'f\_\_Enterobacteriaceae', u'g\_\_', u's\_\_']  
 :lostridiales', u'f\_\_[Tissierellaceae]', u'g\_\_Peptoniphilus', u's\_\_']  
 'l', u'o\_\_Bifidobacteriales', u'f\_\_Bifidobacteriaceae', u'g\_\_Bifidobacterium', u's\_\_']  
 :lostridiales', u'f\_\_Lachnospiraceae', u'g\_\_Blautia', u's\_\_']  
 'l', u'o\_\_Actinomycetales', u'f\_\_Actinomycetaceae', u'g\_\_Actinomyces', u's\_\_']  
 'o\_\_Bacteroidales', u'f\_\_Prevotellaceae', u'g\_\_Prevotella', u's\_\_copri']  
 >bacillales', u'f\_\_Streptococcaceae', u'g\_\_Streptococcus', u's\_\_']  
 :lostridiales', u'f\_\_Clostridiaceae', u'g\_\_Clostridium', u's\_\_']  
 :lostridiales', u'f\_\_Clostridiaceae', u'g\_\_Clostridium']  
 :lostridiales', u'f\_\_Clostridiaceae', u'g\_\_', u's\_\_']  
 'l', u'o\_\_Bifidobacteriales', u'f\_\_Bifidobacteriaceae', u'g\_\_Bifidobacterium', u's\_\_']  
 'o\_\_Bacteroidales', u'f\_\_Bacteroidaceae', u'g\_\_Bacteroides', u's\_\_']  
 'o\_\_Bacteroidales', u'f\_\_Bacteroidaceae', u'g\_\_Bacteroides', u's\_\_fragilis']  
 :lostridiales', u'f\_\_Lachnospiraceae', u'g\_\_Blautia', u's\_\_']  
 'o\_\_Bacteroidales', u'f\_\_Prevotellaceae', u'g\_\_Prevotella', u's\_\_melaninogenica']  
 lales', u'f\_\_Staphylococcaceae', u'g\_\_Staphylococcus', u's\_\_epidermidis']  
 :lostridiales', u'f\_\_Lachnospiraceae', u'g\_\_Blautia', u's\_\_']  
 :lostridiales', u'f\_\_Lachnospiraceae', u'g\_\_[Ruminococcus]', u's\_\_gnavus']  
 ellales', u'f\_\_Gemellaceae', u'g\_\_', u's\_\_']  
 acteria', u'o\_\_Rhizobiales', u'f\_\_Bradyrhizobiaceae', u'g\_\_Bradyrhizobium']  
 >\_\_Erysipelotrichales', u'f\_\_Erysipelotrichaceae', u'g\_\_', u's\_\_']  
 >bacillales', u'f\_\_Streptococcaceae', u'g\_\_Streptococcus', u's\_\_']  
 'o\_\_Bacteroidales', u'f\_\_Bacteroidaceae', u'g\_\_Bacteroides', u's\_\_']  
 :lostridiales', u'f\_\_Clostridiaceae', u'g\_\_', u's\_\_']  
 >bacillales', u'f\_\_Streptococcaceae', u'g\_\_Streptococcus', u's\_\_']  
 'o\_\_Bacteroidales', u'f\_\_Bacteroidaceae', u'g\_\_Bacteroides', u's\_\_']  
 'o\_\_Bacteroidales', u'f\_\_Bacteroidaceae', u'g\_\_Bacteroides', u's\_\_']  
 :lostridiales', u'f\_\_Lachnospiraceae', u'g\_\_Blautia', u's\_\_']  
 cteria', u'o\_\_Burkholderiales', u'f\_\_Comamonadaceae', u'g\_\_Comamonas', u's\_\_']  
 lales', u'f\_\_Staphylococcaceae', u'g\_\_Macrococcus', u's\_\_']  
 :lostridiales', u'f\_\_Clostridiaceae', u'g\_\_Clostridium', u's\_\_perfringens']  
 :lostridiales', u'f\_\_Eubacteriaceae', u'g\_\_Pseudoramibacter\_Eubacterium', u's\_\_']  
 'l', u'o\_\_Actinomycetales', u'f\_\_Corynebacteriaceae', u'g\_\_Corynebacterium', u's\_\_']  
 >bacteria', u'o\_\_Pseudomonadales', u'f\_\_Moraxellaceae', u'g\_\_', u's\_\_']  
 >bacteria', u'o\_\_Pseudomonadales', u'f\_\_Pseudomonadaceae', u'g\_\_Pseudomonas', u's\_\_']  
 :lostridiales', u'f\_\_Lachnospiraceae', u'g\_\_[Ruminococcus]', u's\_\_gnavus']  
 'o\_\_Bacteroidales', u'f\_\_Bacteroidaceae', u'g\_\_Bacteroides', u's\_\_caccae']

:lostridiales', u'f\_\_Lachnospiraceae', u'g\_\_Blautia', u's\_\_']  
 'o\_\_Bacteroidales', u'f\_\_Bacteroidaceae', u'g\_\_Bacteroides', u's\_\_']  
 >bacteria', u'o\_\_Pseudomonadales', u'f\_\_Moraxellaceae', u'g\_\_Moraxella', u's\_\_']  
 :lostridiales', u'f\_\_Lachnospiraceae']  
 :lostridiales', u'f\_\_Clostridiaceae', u'g\_\_', u's\_\_']  
 :lostridiales', u'f\_\_Lachnospiraceae', u'g\_\_[Ruminococcus]', u's\_\_']  
 :lostridiales', u'f\_\_Lachnospiraceae', u'g\_\_Coprococcus', u's\_\_']  
 >bacteria', u'o\_\_Pasteurellales', u'f\_\_Pasteurellaceae', u'g\_\_Haemophilus', u's\_\_parainfluenzae']  
 acteria', u'o\_\_Rhodobacterales', u'f\_\_Rhodobacteraceae', u'g\_\_Paracoccus', u's\_\_aminovorans']  
 :lostridiales', u'f\_\_Lachnospiraceae', u'g\_\_', u's\_\_']  
 :lostridiales', u'f\_\_Lachnospiraceae', u'g\_\_Blautia', u's\_\_']  
 i', u'o\_\_Actinomycetales', u'f\_\_Corynebacteriaceae', u'g\_\_Corynebacterium', u's\_\_']  
 einococcales', u'f\_\_Deinococcaceae', u'g\_\_Deinococcus', u's\_\_']  
 acteria', u'o\_\_Caulobacterales', u'f\_\_Caulobacteraceae', u'g\_\_', u's\_\_']  
 :lostridiales', u'f\_\_Lachnospiraceae', u'g\_\_Blautia', u's\_\_']  
 >bacteria', u'o\_\_Enterobacteriales', u'f\_\_Enterobacteriaceae']  
 :lostridiales', u'f\_\_Lachnospiraceae', u'g\_\_', u's\_\_']  
 >bacillales', u'f\_\_Streptococcaceae', u'g\_\_Streptococcus', u's\_\_']  
 >bacillales', u'f\_\_Streptococcaceae', u'g\_\_Streptococcus', u's\_\_']  
 :lostridiales', u'f\_\_Lachnospiraceae', u'g\_\_[Ruminococcus]', u's\_\_gnavus']  
 >bacteria', u'o\_\_Pasteurellales', u'f\_\_Pasteurellaceae', u'g\_\_Haemophilus', u's\_\_influenzae']  
 >bacillales', u'f\_\_Streptococcaceae', u'g\_\_Streptococcus', u's\_\_']  
 :lostridiales', u'f\_\_Lachnospiraceae', u'g\_\_[Ruminococcus]', u's\_\_gnavus']  
 :lostridiales', u'f\_\_Lachnospiraceae', u'g\_\_', u's\_\_']  
 'o\_\_Bacteroidales', u'f\_\_Bacteroidaceae', u'g\_\_Bacteroides', u's\_\_']  
 'o\_\_Bacteroidales', u'f\_\_Porphyromonadaceae', u'g\_\_Parabacteroides', u's\_\_distasonis']  
 >bacillales', u'f\_\_Lactobacillaceae', u'g\_\_Lactobacillus', u's\_\_iners']  
 :lostridiales', u'f\_\_[Tissierellaceae]', u'g\_\_Peptoniphilus', u's\_\_']  
 :lostridiales', u'f\_\_Ruminococcaceae', u'g\_\_Faecalibacterium', u's\_\_prausnitzii']  
 lales', u'f\_\_Staphylococcaceae', u'g\_\_Staphylococcus', u's\_\_']  
 :lostridiales', u'f\_\_Lachnospiraceae', u'g\_\_Blautia', u's\_\_']  
 acteria', u'o\_\_Rhizobiales', u'f\_\_Rhizobiaceae', u'g\_\_Agrobacterium', u's\_\_']  
 ', u'o\_\_Coriobacteriales', u'f\_\_Coriobacteriaceae', u'g\_\_Adlercreutzia', u's\_\_']  
 :lostridiales', u'f\_\_Lachnospiraceae', u'g\_\_Blautia', u's\_\_']  
 :lostridiales', u'f\_\_Lachnospiraceae', u'g\_\_Blautia', u's\_\_']  
 >bacteria', u'o\_\_Enterobacteriales', u'f\_\_Enterobacteriaceae', u'g\_\_', u's\_\_']  
 :lostridiales', u'f\_\_[Tissierellaceae]', u'g\_\_Finegoldia', u's\_\_']  
 :lostridiales', u'f\_\_Lachnospiraceae', u'g\_\_Blautia', u's\_\_']  
 :lostridiales', u'f\_\_Lachnospiraceae', u'g\_\_Blautia', u's\_\_']  
 i'f\_\_', u'g\_\_', u's\_\_']  
 'o\_\_Bacteroidales', u'f\_\_Porphyromonadaceae', u'g\_\_Parabacteroides', u's\_\_distasonis']  
 >bacteria', u'o\_\_Pasteurellales', u'f\_\_Pasteurellaceae', u'g\_\_Aggregatibacter', u's\_\_']  
 lales', u'f\_\_Staphylococcaceae', u'g\_\_Staphylococcus', u's\_\_']  
 :lostridiales', u'f\_\_Lachnospiraceae', u'g\_\_', u's\_\_']  
 cteria', u'o\_\_Burkholderiales', u'f\_\_Comamonadaceae']  
 >bacillales', u'f\_\_Streptococcaceae', u'g\_\_Streptococcus', u's\_\_']  
 :lostridiales', u'f\_\_Lachnospiraceae', u'g\_\_', u's\_\_']  
 :lostridiales', u'f\_\_Veillonellaceae', u'g\_\_Veillonella', u's\_\_']  
 :lostridiales', u'f\_\_Lachnospiraceae', u'g\_\_Dorea', u's\_\_']  
 >bacteria', u'o\_\_Pseudomonadales', u'f\_\_Pseudomonadaceae']  
 lales', u'f\_\_Staphylococcaceae', u'g\_\_Staphylococcus']  
 :lostridiales', u'f\_\_Clostridiaceae', u'g\_\_Clostridium']  
 lales', u'f\_\_Staphylococcaceae', u'g\_\_Staphylococcus']  
 >bacteria', u'o\_\_Enterobacteriales', u'f\_\_Enterobacteriaceae', u'g\_\_', u's\_\_']  
 >bacillales', u'f\_\_Streptococcaceae', u'g\_\_Streptococcus', u's\_\_']  
 :lostridiales', u'f\_\_Ruminococcaceae', u'g\_\_Ruminococcus', u's\_\_']

lales', u'f\_\_Staphylococcaceae', u'g\_\_Staphylococcus', u's\_\_aureus']  
 :lostridiales', u'f\_\_Clostridiaceae', u'g\_\_', u's\_\_']  
 >bacillales', u'f\_\_Streptococcaceae', u'g\_\_Streptococcus', u's\_\_']  
 :lostridiales', u'f\_\_Ruminococcaceae', u'g\_\_Faecalibacterium', u's\_\_prausnitzii']  
 >bacillales', u'f\_\_Streptococcaceae', u'g\_\_Streptococcus', u's\_\_']  
 cteria', u'o\_\_Burkholderiales', u'f\_\_Oxalobacteraceae', u'g\_\_', u's\_\_']  
 cteria', u'o\_\_Neisseriales', u'f\_\_Neisseriaceae', u'g\_\_Neisseria', u's\_\_']  
 :lostridiales', u'f\_\_Clostridiaceae', u'g\_\_', u's\_\_']  
 :lostridiales', u'f\_\_Lachnospiraceae', u'g\_\_', u's\_\_']  
 cteria', u'o\_\_Burkholderiales', u'f\_\_Comamonadaceae', u'g\_\_Delftia', u's\_\_']  
 :lostridiales', u'f\_\_Lachnospiraceae', u'g\_\_Blautia', u's\_\_']  
 >bacteria', u'o\_\_Enterobacteriales', u'f\_\_Enterobacteriaceae', u'g\_\_', u's\_\_']  
 :lostridiales', u'f\_\_Clostridiaceae', u'g\_\_', u's\_\_']  
 :lostridiales', u'f\_\_Lachnospiraceae', u'g\_\_Blautia', u's\_\_producta']  
 ', u'o\_\_Coriobacteriales', u'f\_\_Coriobacteriaceae', u'g\_\_Collinsella', u's\_\_aerofaciens']  
 'o\_\_Bacteroidales', u'f\_\_Porphyromonadaceae', u'g\_\_Parabacteroides', u's\_\_distasonis']  
 :lostridiales', u'f\_\_Lachnospiraceae', u'g\_\_Blautia', u's\_\_']  
 >bacteria', u'o\_\_Enterobacteriales', u'f\_\_Enterobacteriaceae', u'g\_\_', u's\_\_']  
 >bacteria', u'o\_\_Enterobacteriales', u'f\_\_Enterobacteriaceae', u'g\_\_', u's\_\_']  
 >bacillales', u'f\_\_Streptococcaceae', u'g\_\_Streptococcus', u's\_\_']  
 :lostridiales', u'f\_\_Ruminococcaceae', u'g\_\_', u's\_\_']  
 >bacillales', u'f\_\_Carnobacteriaceae', u'g\_\_Granulicatella', u's\_\_']  
 >bacteria', u'o\_\_Enterobacteriales', u'f\_\_Enterobacteriaceae', u'g\_\_', u's\_\_']  
 i', u'o\_\_Actinomycetales', u'f\_\_Corynebacteriaceae', u'g\_\_Corynebacterium', u's\_\_']  
 iia', u'o\_\_Sphingobacteriales', u'f\_\_Sphingobacteriaceae', u'g\_\_Sphingobacterium', u's\_\_multivorum']  
 :lostridiales', u'f\_\_Ruminococcaceae', u'g\_\_', u's\_\_']  
 >bacteria', u'o\_\_Enterobacteriales', u'f\_\_Enterobacteriaceae', u'g\_\_Erwinia', u's\_\_']  
 cteria', u'o\_\_Burkholderiales', u'f\_\_Comamonadaceae', u'g\_\_', u's\_\_']  
 >bacteria', u'o\_\_Enterobacteriales', u'f\_\_Enterobacteriaceae', u'g\_\_', u's\_\_']  
 i', u'o\_\_Bifidobacteriales', u'f\_\_Bifidobacteriaceae', u'g\_\_Bifidobacterium']  
 >bacillales', u'f\_\_Streptococcaceae', u'g\_\_Streptococcus', u's\_\_']  
 cteria', u'o\_\_Burkholderiales', u'f\_\_Comamonadaceae']  
 'o\_\_Bacteroidales', u'f\_\_Bacteroidaceae', u'g\_\_Bacteroides', u's\_\_']  
 :lostridiales', u'f\_\_Clostridiaceae', u'g\_\_', u's\_\_']  
 lales', u'f\_\_Staphylococcaceae', u'g\_\_Staphylococcus', u's\_\_aureus']  
 :lostridiales', u'f\_\_Lachnospiraceae', u'g\_\_', u's\_\_']  
 cteria', u'o\_\_Burkholderiales', u'f\_\_Comamonadaceae', u'g\_\_', u's\_\_']  
 , u'o\_\_Flavobacteriales', u'f\_\_[Weeksellaceae]', u'g\_\_Chryseobacterium', u's\_\_']  
 >bacillales', u'f\_\_Lactobacillaceae', u'g\_\_', u's\_\_']  
 >bacillales', u'f\_\_Streptococcaceae', u'g\_\_Streptococcus', u's\_\_']  
 :lostridiales', u'f\_\_Lachnospiraceae', u'g\_\_', u's\_\_']  
 :lostridiales', u'f\_\_Veillonellaceae', u'g\_\_Megasphaera', u's\_\_']  
 >bacteria', u'o\_\_Enterobacteriales', u'f\_\_Enterobacteriaceae', u'g\_\_', u's\_\_']  
 >bacillales', u'f\_\_Aerococcaceae', u'g\_\_Alloiococcus', u's\_\_']  
 'o\_\_Bacteroidales', u'f\_\_Bacteroidaceae', u'g\_\_Bacteroides', u's\_\_']  
 'o\_\_Bacteroidales', u'f\_\_Bacteroidaceae', u'g\_\_Bacteroides', u's\_\_']  
 :lostridiales', u'f\_\_Ruminococcaceae', u'g\_\_Oscillospira', u's\_\_']  
 lales', u'f\_\_Staphylococcaceae', u'g\_\_Staphylococcus', u's\_\_epidermidis']  
 'o\_\_Bacteroidales', u'f\_\_Prevotellaceae', u'g\_\_Prevotella', u's\_\_copri']  
 acteria', u'o\_\_Rhodobacterales', u'f\_\_Rhodobacteraceae', u'g\_\_Paracoccus', u's\_\_']  
 :lostridiales', u'f\_\_Veillonellaceae', u'g\_\_Veillonella', u's\_\_dispar']  
 acteria', u'o\_\_Rhizobiales', u'f\_\_Hyphomicrobiaceae', u'g\_\_Devosia', u's\_\_']  
 'o\_\_Bacteroidales', u'f\_\_Prevotellaceae', u'g\_\_Prevotella', u's\_\_']  
 :lostridiales', u'f\_\_Lachnospiraceae', u'g\_\_', u's\_\_']  
 acteria', u'o\_\_Rhizobiales', u'f\_\_Rhizobiaceae', u'g\_\_', u's\_\_']  
 >bacillales', u'f\_\_Streptococcaceae', u'g\_\_Streptococcus', u's\_\_']

>bacillales', u'f\_\_Streptococcaceae', u'g\_\_Streptococcus', u's\_\_']  
 :lostridiales', u'f\_\_Clostridiaceae', u'g\_\_', u's\_\_']  
 :lostridiales', u'f\_\_Ruminococcaceae', u'g\_\_', u's\_\_']  
 cteria', u'o\_\_Burkholderiales', u'f\_\_Alcaligenaceae', u'g\_\_Sutterella', u's\_\_']  
 ', u'o\_\_Coriobacteriales', u'f\_\_Coriobacteriaceae', u'g\_\_Collinsella', u's\_\_aerofaciens']  
 i', u'o\_\_Actinomycetales', u'f\_\_Corynebacteriaceae', u'g\_\_Corynebacterium', u's\_\_']  
 >bacteria', u'o\_\_Pseudomonadales', u'f\_\_Pseudomonadaceae', u'g\_\_Pseudomonas', u's\_\_stutzeri']  
 >bacteria', u'o\_\_Enterobacteriales', u'f\_\_Enterobacteriaceae', u'g\_\_', u's\_\_']  
 :lostridiales', u'f\_\_Veillonellaceae', u'g\_\_Veillonella', u's\_\_dispar']  
 :lostridiales', u'f\_\_Lachnospiraceae', u'g\_\_[Ruminococcus]', u's\_\_gnavus']  
 ', u'o\_\_Coriobacteriales', u'f\_\_Coriobacteriaceae', u'g\_\_Collinsella', u's\_\_']  
 >bacteria', u'o\_\_Enterobacteriales', u'f\_\_Enterobacteriaceae', u'g\_\_', u's\_\_']  
 :lostridiales', u'f\_\_Lachnospiraceae', u'g\_\_Blautia', u's\_\_']  
 cteria', u'o\_\_Burkholderiales', u'f\_\_Comamonadaceae', u'g\_\_', u's\_\_']  
 >bacteria', u'o\_\_Pseudomonadales', u'f\_\_Pseudomonadaceae', u'g\_\_Pseudomonas', u's\_\_']  
 :lostridiales', u'f\_\_Lachnospiraceae', u'g\_\_', u's\_\_']  
 >bacillales', u'f\_\_Streptococcaceae', u'g\_\_Streptococcus', u's\_\_']  
 >bacteria', u'o\_\_Pasteurellales', u'f\_\_Pasteurellaceae', u'g\_\_Haemophilus', u's\_\_']  
 :lostridiales', u'f\_\_Lachnospiraceae', u'g\_\_[Ruminococcus]', u's\_\_gnavus']  
 'o\_\_Bacteroidales', u'f\_\_Bacteroidaceae', u'g\_\_Bacteroides', u's\_\_']  
 >bacillales', u'f\_\_Streptococcaceae', u'g\_\_Lactococcus', u's\_\_']  
 :lostridiales', u'f\_\_Clostridiaceae', u'g\_\_', u's\_\_']  
 :lostridiales', u'f\_\_Veillonellaceae', u'g\_\_Veillonella', u's\_\_dispar']  
 >bacillales', u'f\_\_Enterococcaceae', u'g\_\_Enterococcus', u's\_\_']  
 :lostridiales', u'f\_\_Lachnospiraceae', u'g\_\_[Ruminococcus]', u's\_\_gnavus']  
 >bacteria', u'o\_\_Pseudomonadales', u'f\_\_Pseudomonadaceae', u'g\_\_Pseudomonas', u's\_\_']  
 :lostridiales', u'f\_\_Lachnospiraceae', u'g\_\_', u's\_\_']  
 :lostridiales', u'f\_\_Lachnospiraceae', u'g\_\_Blautia', u's\_\_']  
 :lostridiales', u'f\_\_Lachnospiraceae', u'g\_\_Coprococcus', u's\_\_']  
 'o\_\_Bacteroidales', u'f\_\_Bacteroidaceae', u'g\_\_Bacteroides', u's\_\_']  
 >bacteria', u'o\_\_Pseudomonadales', u'f\_\_Moraxellaceae', u'g\_\_Moraxella', u's\_\_']  
 'o\_\_Cytophagales', u'f\_\_Cytophagaceae', u'g\_\_Hymenobacter', u's\_\_']  
 'o\_\_Bacteroidales', u'f\_\_Bacteroidaceae', u'g\_\_Bacteroides', u's\_\_']  
 i', u'o\_\_Actinomycetales', u'f\_\_Corynebacteriaceae', u'g\_\_Corynebacterium', u's\_\_']  
 acteria', u'o\_\_Rhizobiales', u'f\_\_Phyllobacteriaceae', u'g\_\_Phyllobacterium', u's\_\_']  
 :lostridiales', u'f\_\_Lachnospiraceae', u'g\_\_', u's\_\_']  
 :lostridiales', u'f\_\_Lachnospiraceae', u'g\_\_Blautia', u's\_\_']  
 'o\_\_Bacteroidales', u'f\_\_Bacteroidaceae', u'g\_\_Bacteroides', u's\_\_']  
 'o\_\_Bacteroidales', u'f\_\_Bacteroidaceae', u'g\_\_Bacteroides', u's\_\_uniformis']  
 lales', u'f\_\_Staphylococcaceae', u'g\_\_Staphylococcus']  
 lales', u'f\_\_Staphylococcaceae', u'g\_\_Staphylococcus', u's\_\_epidermidis']  
 >bacillales', u'f\_\_Streptococcaceae', u'g\_\_Streptococcus', u's\_\_']  
 i', u'o\_\_Bifidobacteriales', u'f\_\_Bifidobacteriaceae', u'g\_\_Bifidobacterium']  
 :lostridiales', u'f\_\_Lachnospiraceae', u'g\_\_', u's\_\_']  
 :lostridiales', u'f\_\_Ruminococcaceae', u'g\_\_Oscillospira', u's\_\_']  
 >bacteria', u'o\_\_Pseudomonadales', u'f\_\_Pseudomonadaceae', u'g\_\_Pseudomonas', u's\_\_']  
 i', u'o\_\_Bifidobacteriales', u'f\_\_Bifidobacteriaceae', u'g\_\_Bifidobacterium', u's\_\_']  
 'o\_\_Bacteroidales', u'f\_\_Bacteroidaceae', u'g\_\_Bacteroides', u's\_\_uniformis']  
 :lostridiales', u'f\_\_Clostridiaceae', u'g\_\_SMB53', u's\_\_']  
 'obiae', u'o\_\_Verrucomicrobiales', u'f\_\_Verrucomicrobiaceae', u'g\_\_Akkermansia', u's\_\_muciniphila']  
 >bacillales', u'f\_\_Lactobacillaceae', u'g\_\_Lactobacillus', u's\_\_']  
 acteria', u'o\_\_Rhodobacterales', u'f\_\_Rhodobacteraceae', u'g\_\_Paracoccus']  
 :lostridiales', u'f\_\_Lachnospiraceae', u'g\_\_Lachnospira', u's\_\_']  
 'o\_\_Bacteroidales', u'f\_\_Bacteroidaceae', u'g\_\_Bacteroides', u's\_\_']  
 >bacteria', u'o\_\_Pseudomonadales', u'f\_\_Moraxellaceae', u'g\_\_Acinetobacter', u's\_\_rhizosphaerae']  
 's\_\_']

:lostridiales', u'f\_\_Veillonellaceae', u'g\_\_Megamonas', u's\_\_']  
 :lostridiales', u'f\_\_Veillonellaceae', u'g\_\_Veillonella', u's\_\_']  
 lales', u'f\_\_Staphylococcaceae', u'g\_\_Staphylococcus']  
 obacteria', u'o\_\_Enterobacteriales', u'f\_\_Enterobacteriaceae', u'g\_\_', u's\_\_']  
 lales']  
 robiae', u'o\_\_Verrucomicrobiales', u'f\_\_Verrucomicrobiaceae', u'g\_\_Akkermansia', u's\_\_muciniphila']  
 lales', u'f\_\_Staphylococcaceae', u'g\_\_Staphylococcus', u's\_\_']  
 :lostridiales', u'f\_\_Lachnospiraceae', u'g\_\_[Ruminococcus]', u's\_\_gnavus']  
 :lostridiales', u'f\_\_Clostridiaceae', u'g\_\_', u's\_\_']  
 obacteria', u'o\_\_Pseudomonadales', u'f\_\_Pseudomonadaceae', u'g\_\_Pseudomonas', u's\_\_']  
 obacteria', u'o\_\_Pseudomonadales', u'f\_\_Moraxellaceae', u'g\_\_Acinetobacter', u's\_\_rhizosphaerae']  
 obacillales']  
 obacillales', u'f\_\_Streptococcaceae', u'g\_\_Streptococcus', u's\_\_']  
 i', u'o\_\_Actinomycetales', u'f\_\_Corynebacteriaceae', u'g\_\_Corynebacterium', u's\_\_']  
 obacillales', u'f\_\_Streptococcaceae', u'g\_\_Streptococcus', u's\_\_']  
 i', u'o\_\_Actinomycetales', u'f\_\_Gordoniaceae', u'g\_\_Gordonia', u's\_\_']  
 :lostridiales', u'f\_\_Clostridiaceae', u'g\_\_', u's\_\_']  
 'o\_\_Bacteroidales', u'f\_\_Bacteroidaceae', u'g\_\_Bacteroides', u's\_\_']  
 'o\_\_Bacteroidales', u'f\_\_Bacteroidaceae', u'g\_\_Bacteroides', u's\_\_']  
 'o\_\_Bacteroidales', u'f\_\_Bacteroidaceae', u'g\_\_Bacteroides', u's\_\_caccae']  
 :lostridiales', u'f\_\_Lachnospiraceae', u'g\_\_Blautia', u's\_\_']  
 'o\_\_Bacteroidales', u'f\_\_Bacteroidaceae', u'g\_\_Bacteroides', u's\_\_fragilis']  
 :lostridiales', u'f\_\_Ruminococcaceae', u'g\_\_Ruminococcus', u's\_\_']  
 :lostridiales', u'f\_\_[Tissierellaceae]', u'g\_\_Anaerococcus', u's\_\_']  
 obacteria', u'o\_\_Pseudomonadales', u'f\_\_Pseudomonadaceae', u'g\_\_Pseudomonas', u's\_\_']  
 :lostridiales', u'f\_\_Lachnospiraceae', u'g\_\_Blautia', u's\_\_']  
 :lostridiales', u'f\_\_Lachnospiraceae', u'g\_\_[Ruminococcus]', u's\_\_gnavus']  
 :lostridiales', u'f\_\_Lachnospiraceae']  
 :lostridiales', u'f\_\_Lachnospiraceae']  
 obacteria', u'o\_\_Enterobacteriales', u'f\_\_Enterobacteriaceae', u'g\_\_', u's\_\_']  
 i', u'o\_\_Actinomycetales', u'f\_\_Mycobacteriaceae', u'g\_\_Mycobacterium', u's\_\_']  
 obacteria', u'o\_\_Enterobacteriales', u'f\_\_Enterobacteriaceae', u'g\_\_', u's\_\_']  
 :lostridiales', u'f\_\_Lachnospiraceae', u'g\_\_', u's\_\_']  
 cteria', u'o\_\_Burkholderiales', u'f\_\_Comamonadaceae']  
 i', u'o\_\_Actinomycetales', u'f\_\_Corynebacteriaceae', u'g\_\_Corynebacterium', u's\_\_']  
 lales', u'f\_\_Staphylococcaceae', u'g\_\_Staphylococcus']  
 'o\_\_Bacteroidales', u'f\_\_Bacteroidaceae', u'g\_\_Bacteroides', u's\_\_']  
 i', u'o\_\_Bifidobacteriales', u'f\_\_Bifidobacteriaceae', u'g\_\_Bifidobacterium', u's\_\_']  
 cteria', u'o\_\_Burkholderiales', u'f\_\_Oxalobacteraceae', u'g\_\_', u's\_\_']  
 obacteria', u'o\_\_Pseudomonadales', u'f\_\_Moraxellaceae', u'g\_\_', u's\_\_']  
 obacteria', u'o\_\_Enterobacteriales', u'f\_\_Enterobacteriaceae', u'g\_\_', u's\_\_']  
 obacillales', u'f\_\_Streptococcaceae', u'g\_\_Streptococcus', u's\_\_']  
 :lostridiales', u'f\_\_Lachnospiraceae', u'g\_\_', u's\_\_']  
 obacillales', u'f\_\_Streptococcaceae', u'g\_\_Streptococcus', u's\_\_']  
 'o\_\_Bacteroidales', u'f\_\_Bacteroidaceae', u'g\_\_Bacteroides', u's\_\_']  
 :lostridiales', u'f\_\_Lachnospiraceae', u'g\_\_Blautia', u's\_\_']  
 obacillales', u'f\_\_Streptococcaceae', u'g\_\_Streptococcus', u's\_\_']  
 :lostridiales', u'f\_\_Clostridiaceae']  
 :lostridiales', u'f\_\_Lachnospiraceae', u'g\_\_Dorea', u's\_\_']  
 obacteria', u'o\_\_Enterobacteriales', u'f\_\_Enterobacteriaceae', u'g\_\_', u's\_\_']  
 i', u'o\_\_Actinomycetales', u'f\_\_Corynebacteriaceae', u'g\_\_Corynebacterium', u's\_\_']  
 :lostridiales', u'f\_\_Ruminococcaceae', u'g\_\_Oscillospira', u's\_\_']  
 i', u'o\_\_Actinomycetales', u'f\_\_Microbacteriaceae', u'g\_\_', u's\_\_']  
 'o\_\_Bacteroidales', u'f\_\_Bacteroidaceae', u'g\_\_Bacteroides', u's\_\_']  
 obacteria', u'o\_\_Pseudomonadales', u'f\_\_Moraxellaceae', u'g\_\_Acinetobacter', u's\_\_']  
 obacillales', u'f\_\_Enterococcaceae', u'g\_\_Enterococcus', u's\_\_']

>bacillales', u'f\_\_Streptococcaceae', u'g\_\_Streptococcus', u's\_\_']  
 'obiae', u'o\_\_Verrucomicrobiales', u'f\_\_Verrucomicrobiaceae', u'g\_\_Akkermansia', u's\_\_muciniphila']  
 >bacillales', u'f\_\_Enterococcaceae', u'g\_\_Enterococcus', u's\_\_']  
 :lostridiales', u'f\_\_Lachnospiraceae', u'g\_\_', u's\_\_']  
 'o\_\_Bacteroidales', u'f\_\_Bacteroidaceae', u'g\_\_Bacteroides', u's\_\_']  
 >\_\_Erysipelotrichales', u'f\_\_Erysipelotrichaceae', u'g\_\_[Eubacterium]', u's\_\_dolichum']  
 'i', u'o\_\_Actinomycetales', u'f\_\_Actinomycetaceae', u'g\_\_Actinomyces', u's\_\_']  
 :lostridiales', u'f\_\_Clostridiaceae', u'g\_\_', u's\_\_']  
 :lostridiales', u'f\_\_Clostridiaceae', u'g\_\_Clostridium', u's\_\_']  
 ', u'o\_\_Coriobacteriales', u'f\_\_Coriobacteriaceae', u'g\_\_Atopobium', u's\_\_']  
 lales', u'f\_\_Staphylococcaceae', u'g\_\_Staphylococcus', u's\_\_']  
 >bacillales', u'f\_\_Lactobacillaceae', u'g\_\_Lactobacillus', u's\_\_zeae']  
 :lostridiales', u'f\_\_Lachnospiraceae', u'g\_\_Roseburia', u's\_\_']  
 :lostridiales', u'f\_\_Ruminococcaceae', u'g\_\_Oscillospira', u's\_\_']  
 :lostridiales', u'f\_\_Lachnospiraceae', u'g\_\_', u's\_\_']  
 lales', u'f\_\_Planococcaceae', u'g\_\_', u's\_\_']  
 :lostridiales', u'f\_\_Lachnospiraceae', u'g\_\_Lachnospira', u's\_\_']  
 >bacillales', u'f\_\_Streptococcaceae', u'g\_\_Streptococcus', u's\_\_']  
 >bacillales', u'f\_\_Streptococcaceae', u'g\_\_Streptococcus', u's\_\_']  
 'o\_\_Bacteroidales', u'f\_\_Bacteroidaceae', u'g\_\_Bacteroides', u's\_\_']  
 :lostridiales', u'f\_\_Lachnospiraceae']  
 >bacillales', u'f\_\_Aerococcaceae', u'g\_\_Alloiococcus', u's\_\_']  
 >bacteria', u'o\_\_Enterobacteriales', u'f\_\_Enterobacteriaceae', u'g\_\_', u's\_\_']  
 :lostridiales', u'f\_\_Veillonellaceae', u'g\_\_Veillonella', u's\_\_']  
 >bacillales', u'f\_\_Leuconostocaceae', u'g\_\_Leuconostoc', u's\_\_']  
 :lostridiales', u'f\_\_Lachnospiraceae', u'g\_\_', u's\_\_']  
 'i', u'o\_\_Actinomycetales', u'f\_\_Micrococcaceae', u'g\_\_Microbispora', u's\_\_rosea']  
 'i', u'o\_\_Bifidobacteriales', u'f\_\_Bifidobacteriaceae', u'g\_\_Bifidobacterium', u's\_\_adolescentis']  
 'o\_\_Bacteroidales', u'f\_\_Bacteroidaceae', u'g\_\_Bacteroides', u's\_\_']  
 >bacteria', u'o\_\_Pseudomonadales', u'f\_\_Moraxellaceae', u'g\_\_', u's\_\_']  
 :lostridiales']  
 >bacillales', u'f\_\_Streptococcaceae', u'g\_\_Streptococcus', u's\_\_']  
 'o\_\_Bacteroidales', u'f\_\_Bacteroidaceae', u'g\_\_Bacteroides', u's\_\_uniformis']  
 >bacteria', u'o\_\_Enterobacteriales', u'f\_\_Enterobacteriaceae', u'g\_\_', u's\_\_']  
 :lostridiales', u'f\_\_Ruminococcaceae', u'g\_\_Faecalibacterium', u's\_\_prausnitzii']  
 lales', u'f\_\_Paenibacillaceae', u'g\_\_Paenibacillus', u's\_\_']  
 >bacillales', u'f\_\_Streptococcaceae', u'g\_\_Streptococcus', u's\_\_']  
 :lostridiales', u'f\_\_Lachnospiraceae', u'g\_\_[Ruminococcus]', u's\_\_gnavus']  
 >bacillales', u'f\_\_Lactobacillaceae', u'g\_\_Lactobacillus', u's\_\_']  
 >bacillales', u'f\_\_Streptococcaceae', u'g\_\_Streptococcus', u's\_\_']  
 'i', u'o\_\_Bifidobacteriales', u'f\_\_Bifidobacteriaceae', u'g\_\_Bifidobacterium']  
 >bacteria', u'o\_\_Enterobacteriales', u'f\_\_Enterobacteriaceae', u'g\_\_', u's\_\_']  
 'i', u'o\_\_Actinomycetales', u'f\_\_Dermabacteraceae', u'g\_\_Dermabacter', u's\_\_']  
 'o\_\_Bacteroidales', u'f\_\_Rikenellaceae', u'g\_\_', u's\_\_']  
 :lostridiales', u'f\_\_Lachnospiraceae', u'g\_\_Coprococcus', u's\_\_']  
 lales', u'f\_\_Staphylococcaceae', u'g\_\_Staphylococcus', u's\_\_']  
 :lostridiales', u'f\_\_Lachnospiraceae', u'g\_\_[Ruminococcus]', u's\_\_']  
 >bacteria', u'o\_\_Pseudomonadales', u'f\_\_Pseudomonadaceae', u'g\_\_Pseudomonas', u's\_\_']  
 lales', u'f\_\_Staphylococcaceae', u'g\_\_Staphylococcus']  
 cteria', u'o\_\_Burkholderiales', u'f\_\_Comamonadaceae', u'g\_\_', u's\_\_']  
 'i', u'o\_\_Actinomycetales', u'f\_\_Corynebacteriaceae', u'g\_\_Corynebacterium', u's\_\_']  
 >bacillales', u'f\_\_Enterococcaceae', u'g\_\_Enterococcus', u's\_\_']  
 cteria', u'o\_\_Burkholderiales', u'f\_\_Comamonadaceae']  
 'o\_\_Bacteroidales', u'f\_\_Bacteroidaceae', u'g\_\_Bacteroides', u's\_\_']  
 'o\_\_Bacteroidales', u'f\_\_Porphyromonadaceae', u'g\_\_Parabacteroides', u's\_\_']  
 'o\_\_Bacteroidales', u'f\_\_Bacteroidaceae', u'g\_\_Bacteroides', u's\_\_']

'o\_\_Bacteroidales', u'f\_\_Bacteroidaceae', u'g\_\_Bacteroides', u's\_\_']  
 , u'o\_\_Flavobacteriales', u'f\_\_[Weeksellaceae]', u'g\_\_Chryseobacterium', u's\_\_']  
 :lostridiales', u'f\_\_Veillonellaceae', u'g\_\_Veillonella', u's\_\_dispar']  
 :lostridiales', u'f\_\_Lachnospiraceae', u'g\_\_Blautia', u's\_\_']  
 >bacteria', u'o\_\_Enterobacteriales', u'f\_\_Enterobacteriaceae', u'g\_\_Providencia', u's\_\_']  
 >bacteria', u'o\_\_Pseudomonadales', u'f\_\_Moraxellaceae', u'g\_\_Acinetobacter', u's\_\_']  
 i', u'o\_\_Actinomycetales', u'f\_\_Corynebacteriaceae', u'g\_\_Corynebacterium', u's\_\_']  
 'o\_\_Bacteroidales', u'f\_\_Bacteroidaceae', u'g\_\_Bacteroides', u's\_\_']  
 >bacillales', u'f\_\_Streptococcaceae', u'g\_\_Streptococcus', u's\_\_']  
 lales', u'f\_\_Staphylococcaceae', u'g\_\_Staphylococcus']  
 :lostridiales', u'f\_\_Lachnospiraceae', u'g\_\_Blautia', u's\_\_producta']  
 >bacillales', u'f\_\_Aerococcaceae', u'g\_\_Aerococcus', u's\_\_']  
 'o\_\_Bacteroidales', u'f\_\_Bacteroidaceae', u'g\_\_Bacteroides', u's\_\_']  
 :lostridiales', u'f\_\_Clostridiaceae', u'g\_\_', u's\_\_']  
 >bacteria', u'o\_\_Pseudomonadales', u'f\_\_Pseudomonadaceae', u'g\_\_Pseudomonas', u's\_\_']  
 :lostridiales', u'f\_\_Lachnospiraceae', u'g\_\_Blautia', u's\_\_producta']  
 'o\_\_Bacteroidales', u'f\_\_Bacteroidaceae', u'g\_\_Bacteroides', u's\_\_']  
 :lostridiales', u'f\_\_Lachnospiraceae', u'g\_\_[Ruminococcus]', u's\_\_']  
 :lostridiales', u'f\_\_Lachnospiraceae', u'g\_\_Blautia', u's\_\_']  
 >bacillales', u'f\_\_Lactobacillaceae', u'g\_\_Lactobacillus', u's\_\_']  
 :lostridiales', u'f\_\_Eubacteriaceae', u'g\_\_Pseudoramibacter\_Eubacterium', u's\_\_']  
 i', u'o\_\_Actinomycetales', u'f\_\_Micrococcaceae', u'g\_\_Rothia', u's\_\_dentocariosa']  
 cteria', u'o\_\_Burkholderiales', u'f\_\_Comamonadaceae', u'g\_\_', u's\_\_']  
 'o\_\_Bacteroidales', u'f\_\_Bacteroidaceae', u'g\_\_Bacteroides', u's\_\_uniformis']  
 >bacillales', u'f\_\_Streptococcaceae', u'g\_\_Streptococcus', u's\_\_']  
 :lostridiales', u'f\_\_Lachnospiraceae', u'g\_\_', u's\_\_']  
 cteria', u'o\_\_Burkholderiales', u'f\_\_Comamonadaceae', u'g\_\_', u's\_\_']  
 >bacillales', u'f\_\_Streptococcaceae', u'g\_\_Streptococcus', u's\_\_']  
 :lostridiales', u'f\_\_Ruminococcaceae', u'g\_\_Oscillospira', u's\_\_']  
 >bacillales', u'f\_\_Streptococcaceae', u'g\_\_Streptococcus', u's\_\_']  
 >bacillales', u'f\_\_Enterococcaceae']  
 :lostridiales', u'f\_\_Lachnospiraceae', u'g\_\_Blautia', u's\_\_']  
 i', u'o\_\_Actinomycetales', u'f\_\_Corynebacteriaceae', u'g\_\_Corynebacterium', u's\_\_']  
 'o\_\_Bacteroidales', u'f\_\_Porphyromonadaceae', u'g\_\_Parabacteroides', u's\_\_distasonis']  
 i', u'o\_\_Actinomycetales', u'f\_\_Micrococcaceae', u'g\_\_Micrococcus', u's\_\_']  
 >bacteria', u'o\_\_Enterobacteriales', u'f\_\_Enterobacteriaceae', u'g\_\_Erwinia', u's\_\_']  
 lales', u'f\_\_Staphylococcaceae', u'g\_\_Staphylococcus', u's\_\_']  
 'o\_\_Bacteroidales', u'f\_\_Porphyromonadaceae', u'g\_\_Parabacteroides', u's\_\_']  
 'o\_\_Bacteroidales', u'f\_\_Bacteroidaceae', u'g\_\_Bacteroides', u's\_\_uniformis']  
 >bacillales', u'f\_\_Enterococcaceae', u'g\_\_Enterococcus', u's\_\_']  
 >bacillales', u'f\_\_Streptococcaceae', u'g\_\_Streptococcus', u's\_\_']  
 , u'g\_\_', u's\_\_']  
 :lostridiales', u'f\_\_Clostridiaceae', u'g\_\_Clostridium', u's\_\_']  
 'o\_\_Bacteroidales', u'f\_\_Bacteroidaceae', u'g\_\_Bacteroides', u's\_\_']  
 >bacillales', u'f\_\_Lactobacillaceae', u'g\_\_Lactobacillus', u's\_\_zeae']  
 :lostridiales', u'f\_\_Veillonellaceae', u'g\_\_Veillonella', u's\_\_dispar']  
 :lostridiales', u'f\_\_Clostridiaceae', u'g\_\_', u's\_\_']  
 , u's\_\_']  
 >bacteria', u'o\_\_Enterobacteriales', u'f\_\_Enterobacteriaceae', u'g\_\_', u's\_\_']  
 'o\_\_Bacteroidales', u'f\_\_Bacteroidaceae', u'g\_\_Bacteroides', u's\_\_']  
 i', u'o\_\_Bifidobacteriales', u'f\_\_Bifidobacteriaceae', u'g\_\_Bifidobacterium', u's\_\_adolescentis']  
 lales', u'f\_\_Staphylococcaceae', u'g\_\_Staphylococcus']  
 >bacillales', u'f\_\_Aerococcaceae', u'g\_\_', u's\_\_']  
 acteria', u'o\_\_Rhizobiales', u'f\_\_Rhizobiaceae']  
 u'o\_\_Fusobacteriales', u'f\_\_Fusobacteriaceae', u'g\_\_Fusobacterium', u's\_\_']  
 i', u'o\_\_Actinomycetales', u'f\_\_Nocardaceae', u'g\_\_Rhodococcus', u's\_\_fascians']



:lostridiales', u'f\_\_Ruminococcaceae', u'g\_\_', u's\_\_']  
 >bacteria', u'o\_\_Enterobacteriales', u'f\_\_Enterobacteriaceae', u'g\_\_', u's\_\_']  
 >bacillales', u'f\_\_Streptococcaceae', u'g\_\_Streptococcus', u's\_\_infantis']  
 :lostridiales', u'f\_\_Ruminococcaceae', u'g\_\_', u's\_\_']  
 :lostridiales', u'f\_\_Lachnospiraceae', u'g\_\_', u's\_\_']  
 'o\_\_Bacteroidales', u'f\_\_Prevotellaceae', u'g\_\_Prevotella', u's\_\_']  
 ycidae', u'o\_\_Chroococcales', u'f\_\_Xenococcaceae', u'g\_\_', u's\_\_']  
 :lostridiales', u'f\_\_Ruminococcaceae', u'g\_\_Ruminococcus', u's\_\_']  
 >bacillales', u'f\_\_Carnobacteriaceae', u'g\_\_Granulicatella', u's\_\_']  
 >bacillales', u'f\_\_Streptococcaceae', u'g\_\_Streptococcus', u's\_\_']  
 :lostridiales', u'f\_\_Lachnospiraceae', u'g\_\_', u's\_\_']  
 'o\_\_Bacteroidales', u'f\_\_Prevotellaceae', u'g\_\_Prevotella', u's\_\_copri']  
 >bacillales', u'f\_\_Enterococcaceae', u'g\_\_Enterococcus', u's\_\_']  
 i', u'o\_\_Actinomycetales', u'f\_\_Corynebacteriaceae', u'g\_\_Corynebacterium', u's\_\_']  
 'o\_\_Bacteroidales', u'f\_\_Bacteroidaceae', u'g\_\_Bacteroides', u's\_\_']  
 :lostridiales', u'f\_\_Veillonellaceae', u'g\_\_Veillonella', u's\_\_dispar']  
 i', u'o\_\_Actinomycetales', u'f\_\_Micrococcaceae', u'g\_\_Rothia', u's\_\_mucilaginoso']  
 :lostridiales', u'f\_\_Lachnospiraceae', u'g\_\_[Ruminococcus]', u's\_\_']  
 'o\_\_Bacteroidales', u'f\_\_Bacteroidaceae', u'g\_\_Bacteroides', u's\_\_']  
 >bacteria', u'o\_\_Pseudomonadales', u'f\_\_Moraxellaceae', u'g\_\_Acinetobacter', u's\_\_rhizosphaerae']  
 :lostridiales', u'f\_\_Lachnospiraceae', u'g\_\_Blautia', u's\_\_']  
 'o\_\_Bacteroidales', u'f\_\_Bacteroidaceae', u'g\_\_Bacteroides', u's\_\_']  
 :lostridiales', u'f\_\_Ruminococcaceae', u'g\_\_Ruminococcus', u's\_\_']  
 :lostridiales', u'f\_\_Lachnospiraceae', u'g\_\_Lachnospira', u's\_\_']  
 >bacteria', u'o\_\_Pseudomonadales', u'f\_\_Pseudomonadaceae', u'g\_\_', u's\_\_']  
 :lostridiales', u'f\_\_Clostridiaceae', u'g\_\_Clostridium']  
 >bacteria', u'o\_\_Pseudomonadales', u'f\_\_Pseudomonadaceae', u'g\_\_Pseudomonas', u's\_\_']  
 i', u'o\_\_Bifidobacteriales', u'f\_\_Bifidobacteriaceae', u'g\_\_Bifidobacterium', u's\_\_']  
 >bacillales', u'f\_\_Streptococcaceae', u'g\_\_Streptococcus', u's\_\_']  
 i', u'o\_\_Actinomycetales', u'f\_\_Actinomycetaceae', u'g\_\_Actinomyces', u's\_\_']  
 :lostridiales', u'f\_\_Lachnospiraceae', u'g\_\_Dorea', u's\_\_']  
 'o\_\_Bacteroidales', u'f\_\_[Barnesiellaceae]', u'g\_\_', u's\_\_']  
 :lostridiales', u'f\_\_', u'g\_\_', u's\_\_']  
 'o\_\_Bacteroidales', u'f\_\_Bacteroidaceae', u'g\_\_Bacteroides', u's\_\_uniformis']  
 >bacteria', u'o\_\_Pseudomonadales', u'f\_\_Pseudomonadaceae', u'g\_\_Pseudomonas', u's\_\_']  
 >bacteria', u'o\_\_Enterobacteriales', u'f\_\_Enterobacteriaceae', u'g\_\_', u's\_\_']  
 :lostridiales', u'f\_\_Lachnospiraceae', u'g\_\_Roseburia', u's\_\_']  
 lales', u'f\_\_Staphylococcaceae', u'g\_\_Staphylococcus']  
 >bacteria', u'o\_\_Pseudomonadales', u'f\_\_Moraxellaceae', u'g\_\_Acinetobacter']  
 cteria', u'o\_\_Burkholderiales', u'f\_\_Alcaligenaceae', u'g\_\_Sutterella', u's\_\_']  
 >bacillales', u'f\_\_Lactobacillaceae', u'g\_\_Lactobacillus', u's\_\_']  
 :lostridiales', u'f\_\_Clostridiaceae', u'g\_\_', u's\_\_']  
 'o\_\_Bacteroidales', u'f\_\_Bacteroidaceae', u'g\_\_Bacteroides', u's\_\_uniformis']  
 :lostridiales', u'f\_\_Ruminococcaceae', u'g\_\_Faecalibacterium', u's\_\_prausnitzii']  
 iia', u'o\_\_Sphingobacteriales', u'f\_\_Sphingobacteriaceae', u'g\_\_Sphingobacterium', u's\_\_']  
 :lostridiales', u'f\_\_Lachnospiraceae', u'g\_\_Dorea', u's\_\_']  
 cteria', u'o\_\_Neisseriales', u'f\_\_Neisseriaceae', u'g\_\_', u's\_\_']  
 acteria', u'o\_\_Rhodobacterales', u'f\_\_Rhodobacteraceae', u'g\_\_Paracoccus', u's\_\_']  
 'o\_\_Bacteroidales', u'f\_\_Bacteroidaceae', u'g\_\_Bacteroides', u's\_\_uniformis']  
 :lostridiales', u'f\_\_Ruminococcaceae', u'g\_\_', u's\_\_']  
 cteria', u'o\_\_Burkholderiales', u'f\_\_Alcaligenaceae', u'g\_\_Sutterella', u's\_\_']  
 lales', u'f\_\_Staphylococcaceae', u'g\_\_Staphylococcus', u's\_\_epidermidis']  
 obiae', u'o\_\_Verrucomicrobiales', u'f\_\_Verrucomicrobiaceae', u'g\_\_Akkermansia', u's\_\_muciniphila']  
 :lostridiales', u'f\_\_Lachnospiraceae', u'g\_\_[Ruminococcus]', u's\_\_gnavus']  
 :lostridiales', u'f\_\_Lachnospiraceae', u'g\_\_', u's\_\_']  
 >bacteria', u'o\_\_Enterobacteriales', u'f\_\_Enterobacteriaceae', u'g\_\_', u's\_\_']

:lostridiales', u'f\_\_Lachnospiraceae']  
 cteria', u'o\_\_Burkholderiales', u'f\_\_Oxalobacteraceae', u'g\_\_', u's\_\_']  
 i', u'o\_\_Actinomycetales', u'f\_\_Micrococcaceae', u'g\_\_Rothia', u's\_\_mucilaginoso']  
 ellales', u'f\_\_Gemellaceae', u'g\_\_', u's\_\_']  
 :lostridiales', u'f\_\_Lachnospiraceae', u'g\_\_Coprococcus', u's\_\_']  
 :lostridiales', u'f\_\_Clostridiaceae', u'g\_\_Clostridium', u's\_\_perfringens']  
 :lostridiales', u'f\_\_Lachnospiraceae', u'g\_\_Blautia', u's\_\_']  
 :lostridiales', u'f\_\_Lachnospiraceae', u'g\_\_Dorea', u's\_\_']  
 :lostridiales', u'f\_\_Ruminococcaceae', u'g\_\_', u's\_\_']  
 :lostridiales', u'f\_\_Lachnospiraceae', u'g\_\_', u's\_\_']  
 i', u'o\_\_Actinomycetales', u'f\_\_Corynebacteriaceae', u'g\_\_Corynebacterium', u's\_\_']  
 i', u'o\_\_Bifidobacteriales', u'f\_\_Bifidobacteriaceae', u'g\_\_Bifidobacterium']  
 o\_\_Erysipelotrichales', u'f\_\_Erysipelotrichaceae', u'g\_\_', u's\_\_']  
 obacillales', u'f\_\_Streptococcaceae', u'g\_\_Lactococcus', u's\_\_']  
 'o\_\_Bacteroidales', u'f\_\_Bacteroidaceae', u'g\_\_Bacteroides', u's\_\_uniformis']  
 obacteria', u'o\_\_Enterobacteriales', u'f\_\_Enterobacteriaceae', u'g\_\_', u's\_\_']  
 :lostridiales', u'f\_\_Lachnospiraceae', u'g\_\_Dorea', u's\_\_']  
 :lostridiales', u'f\_\_Ruminococcaceae', u'g\_\_', u's\_\_']  
 'o\_\_Bacteroidales', u'f\_\_Bacteroidaceae', u'g\_\_Bacteroides', u's\_\_uniformis']  
 obacteria', u'o\_\_Enterobacteriales', u'f\_\_Enterobacteriaceae', u'g\_\_', u's\_\_']  
 'o\_\_Bacteroidales', u'f\_\_Bacteroidaceae', u'g\_\_Bacteroides', u's\_\_']  
 obacillales', u'f\_\_Carnobacteriaceae', u'g\_\_Granulicatella', u's\_\_']  
 obacillales', u'f\_\_Carnobacteriaceae', u'g\_\_Granulicatella', u's\_\_']  
 :lostridiales', u'f\_\_Lachnospiraceae', u'g\_\_Blautia', u's\_\_']  
 :lostridiales', u'f\_\_', u'g\_\_', u's\_\_']  
 :lostridiales', u'f\_\_Lachnospiraceae', u'g\_\_[Ruminococcus]', u's\_\_gnavus']  
 :lostridiales', u'f\_\_Ruminococcaceae', u'g\_\_Ruminococcus', u's\_\_']  
 :lostridiales', u'f\_\_[Tissierellaceae]', u'g\_\_Finegoldia', u's\_\_']  
 'o\_\_Streptophyta', u'f\_\_', u'g\_\_', u's\_\_']  
 obacteria', u'o\_\_Pseudomonadales', u'f\_\_Moraxellaceae', u'g\_\_Moraxella', u's\_\_']  
 acteria', u'o\_\_Caulobacterales', u'f\_\_Caulobacteraceae', u'g\_\_Brevundimonas', u's\_\_diminuta']  
 obacteria', u'o\_\_Enterobacteriales', u'f\_\_Enterobacteriaceae', u'g\_\_', u's\_\_']  
 i', u'o\_\_Bifidobacteriales', u'f\_\_Bifidobacteriaceae', u'g\_\_Bifidobacterium', u's\_\_']  
 obacillales', u'f\_\_Enterococcaceae', u'g\_\_Enterococcus', u's\_\_']  
 :lostridiales', u'f\_\_Clostridiaceae', u'g\_\_', u's\_\_']  
 acteria', u'o\_\_Rhizobiales', u'f\_\_Rhizobiaceae', u'g\_\_Agrobacterium', u's\_\_']  
 obacteria', u'o\_\_Pseudomonadales', u'f\_\_Pseudomonadaceae', u'g\_\_Pseudomonas', u's\_\_']  
 obacillales', u'f\_\_Streptococcaceae', u'g\_\_Streptococcus', u's\_\_']  
 obacillales', u'f\_\_Streptococcaceae', u'g\_\_Streptococcus', u's\_\_']  
 ', u'o\_\_Coriobacteriales', u'f\_\_Coriobacteriaceae', u'g\_\_Collinsella', u's\_\_aerofaciens']  
 :lostridiales', u'f\_\_Veillonellaceae', u'g\_\_Veillonella', u's\_\_dispar']  
 :lostridiales', u'f\_\_Lachnospiraceae', u'g\_\_Blautia', u's\_\_']  
 i', u'o\_\_Actinomycetales', u'f\_\_Actinomycetaceae', u'g\_\_Actinomyces', u's\_\_']  
 ellales', u'f\_\_Gemellaceae', u'g\_\_Gemella', u's\_\_']  
 acteria', u'o\_\_Caulobacterales', u'f\_\_Caulobacteraceae', u'g\_\_Brevundimonas', u's\_\_diminuta']  
 obacteria', u'o\_\_Enterobacteriales', u'f\_\_Enterobacteriaceae', u'g\_\_', u's\_\_']  
 :lostridiales', u'f\_\_Clostridiaceae', u'g\_\_', u's\_\_']  
 obacillales', u'f\_\_Lactobacillaceae', u'g\_\_Lactobacillus', u's\_\_zeae']  
 :lostridiales', u'f\_\_[Tissierellaceae]', u'g\_\_Anaerococcus', u's\_\_']  
 :lostridiales', u'f\_\_Lachnospiraceae', u'g\_\_Dorea', u's\_\_']  
 obacteria', u'o\_\_Enterobacteriales', u'f\_\_Enterobacteriaceae', u'g\_\_', u's\_\_']  
 :lostridiales', u'f\_\_Lachnospiraceae', u'g\_\_[Ruminococcus]', u's\_\_gnavus']  
 'o\_\_Bacteroidales', u'f\_\_Porphyromonadaceae', u'g\_\_Parabacteroides', u's\_\_distasonis']  
 :lostridiales', u'f\_\_Lachnospiraceae', u'g\_\_', u's\_\_']  
 cteria', u'o\_\_Burkholderiales', u'f\_\_Alcaligenaceae', u'g\_\_Sutterella', u's\_\_']  
 :lostridiales', u'f\_\_Clostridiaceae', u'g\_\_', u's\_\_']

'o\_\_Bacteroidales', u'f\_\_Bacteroidaceae', u'g\_\_Bacteroides', u's\_\_uniformis']  
]bacteria', u'o\_\_Pseudomonadales', u'f\_\_Pseudomonadaceae', u'g\_\_Pseudomonas', u's\_\_]  
:lostridiales', u'f\_\_Ruminococcaceae', u'g\_\_', u's\_\_]  
, u'o\_\_Flavobacteriales', u'f\_\_[Weeksellaceae]', u'g\_\_', u's\_\_]  
'o\_\_Bacteroidales', u'f\_\_Bacteroidaceae', u'g\_\_Bacteroides', u's\_\_]  
:lostridiales', u'f\_\_Clostridiaceae', u'g\_\_', u's\_\_]  
:lostridiales', u'f\_\_Clostridiaceae', u'g\_\_', u's\_\_]  
'o\_\_Bacteroidales', u'f\_\_Bacteroidaceae', u'g\_\_Bacteroides', u's\_\_]  
]bacillales', u'f\_\_Streptococcaceae', u'g\_\_Streptococcus', u's\_\_]  
:lostridiales', u'f\_\_Veillonellaceae', u'g\_\_Veillonella', u's\_\_]  
]ales', u'f\_\_Staphylococcaceae', u'g\_\_Staphylococcus', u's\_\_]  
]bacteria', u'o\_\_Enterobacteriales', u'f\_\_Enterobacteriaceae', u'g\_\_Morganella]  
]bacteria', u'o\_\_Enterobacteriales', u'f\_\_Enterobacteriaceae', u'g\_\_', u's\_\_]  
]bacillales', u'f\_\_Carnobacteriaceae', u'g\_\_Granulicatella', u's\_\_]  
]acteria', u'o\_\_Rickettsiales', u'f\_\_Rickettsiaceae', u'g\_\_Rickettsia', u's\_\_]  
]ellales', u'f\_\_Gemellaceae', u'g\_\_', u's\_\_]  
'o\_\_Bacteroidales', u'f\_\_Bacteroidaceae', u'g\_\_Bacteroides', u's\_\_]  
]ales', u'f\_\_Staphylococcaceae', u'g\_\_Staphylococcus]  
]l', u'o\_\_Actinomycetales', u'f\_\_Actinomycetaceae', u'g\_\_', u's\_\_]  
'o\_\_Bacteroidales', u'f\_\_[Barnesiellaceae]', u'g\_\_', u's\_\_]  
:lostridiales', u'f\_\_Lachnospiraceae', u'g\_\_', u's\_\_]  
]acteria', u'o\_\_Rhodobacterales', u'f\_\_Rhodobacteraceae', u'g\_\_Paracoccus', u's\_\_aminovorans']  
]bacillales', u'f\_\_Streptococcaceae', u'g\_\_Streptococcus', u's\_\_]  
]bacteria', u'o\_\_Enterobacteriales', u'f\_\_Enterobacteriaceae', u'g\_\_', u's\_\_]  
]bacteria', u'o\_\_Pseudomonadales', u'f\_\_Pseudomonadaceae', u'g\_\_Pseudomonas', u's\_\_]  
]acteria', u'o\_\_Rickettsiales', u'f\_\_Rickettsiaceae', u'g\_\_Rickettsia', u's\_\_]  
:lostridiales', u'f\_\_Lachnospiraceae', u'g\_\_Dorea', u's\_\_]  
:lostridiales', u'f\_\_Clostridiaceae', u'g\_\_', u's\_\_]  
]l', u'o\_\_Actinomycetales', u'f\_\_Corynebacteriaceae', u'g\_\_Corynebacterium', u's\_\_]  
]bacteria', u'o\_\_Pseudomonadales', u'f\_\_Pseudomonadaceae', u'g\_\_Pseudomonas', u's\_\_]  
]acteria', u'o\_\_Neisseriales', u'f\_\_Neisseriaceae', u'g\_\_Neisseria', u's\_\_subflava']  
]l', u'o\_\_Actinomycetales', u'f\_\_Actinomycetaceae', u'g\_\_Actinomyces', u's\_\_]  
]bacillales', u'f\_\_Lactobacillaceae', u'g\_\_Lactobacillus', u's\_\_]  
]ales', u'f\_\_Staphylococcaceae', u'g\_\_Staphylococcus', u's\_\_aureus']  
:lostridiales', u'f\_\_Veillonellaceae', u'g\_\_Veillonella', u's\_\_dispar]  
]ales', u'f\_\_Staphylococcaceae', u'g\_\_Staphylococcus]  
]bacteria', u'o\_\_Alteromonadales', u'f\_\_[Chromatiaceae]', u'g\_\_Rheinheimera', u's\_\_]  
]ales', u'f\_\_Staphylococcaceae', u'g\_\_Staphylococcus', u's\_\_]  
]l', u'o\_\_Actinomycetales', u'f\_\_Actinomycetaceae', u'g\_\_Actinomyces', u's\_\_]  
]l', u'o\_\_Actinomycetales', u'f\_\_Corynebacteriaceae', u'g\_\_Corynebacterium', u's\_\_]  
]bacteria', u'o\_\_Enterobacteriales', u'f\_\_Enterobacteriaceae', u'g\_\_', u's\_\_]  
:lostridiales', u'f\_\_Veillonellaceae', u'g\_\_Veillonella', u's\_\_parvula]  
'o\_\_Bacteroidales', u'f\_\_Porphyromonadaceae', u'g\_\_Parabacteroides', u's\_\_]  
]bacteria', u'o\_\_Enterobacteriales', u'f\_\_Enterobacteriaceae', u'g\_\_', u's\_\_]  
]bacteria', u'o\_\_Pseudomonadales', u'f\_\_Pseudomonadaceae', u'g\_\_Pseudomonas', u's\_\_]  
'o\_\_Bacteroidales', u'f\_\_Bacteroidaceae', u'g\_\_Bacteroides', u's\_\_]  
:lostridiales', u'f\_\_Veillonellaceae', u'g\_\_Phascolarctobacterium', u's\_\_]  
]ales', u'f\_\_Staphylococcaceae', u'g\_\_Staphylococcus]  
]acteria', u'o\_\_Burkholderiales', u'f\_\_Comamonadaceae', u'g\_\_', u's\_\_]  
]acteria', u'o\_\_Neisseriales', u'f\_\_Neisseriaceae', u'g\_\_', u's\_\_]  
'o\_\_Bacteroidales', u'f\_\_Porphyromonadaceae', u'g\_\_Parabacteroides', u's\_\_]  
:lostridiales', u'f\_\_Lachnospiraceae', u'g\_\_Dorea', u's\_\_]  
]l', u'o\_\_Actinomycetales', u'f\_\_Actinomycetaceae', u'g\_\_Actinomyces', u's\_\_]  
:lostridiales', u'f\_\_Ruminococcaceae', u'g\_\_Faecalibacterium', u's\_\_prausnitzii']  
'o\_\_Bacteroidales', u'f\_\_Bacteroidaceae', u'g\_\_Bacteroides', u's\_\_]  
\_, u'g\_\_', u's\_\_']

i', u'o\_\_Actinomycetales', u'f\_\_Corynebacteriaceae', u'g\_\_Corynebacterium', u's\_\_']  
 cteria', u'o\_\_Burkholderiales', u'f\_\_Oxalobacteraceae', u'g\_\_', u's\_\_']  
 :lostridiales', u'f\_\_Lachnospiraceae', u'g\_\_', u's\_\_']  
 'o\_\_Bacteroidales', u'f\_\_Bacteroidaceae', u'g\_\_Bacteroides', u's\_\_']  
 >bacteria', u'o\_\_Enterobacteriales', u'f\_\_Enterobacteriaceae', u'g\_\_', u's\_\_']  
 >bacteria', u'o\_\_Enterobacteriales', u'f\_\_Enterobacteriaceae', u'g\_\_', u's\_\_']  
 :lostridiales', u'f\_\_Lachnospiraceae', u'g\_\_[Ruminococcus]', u's\_\_']  
 acteria', u'o\_\_Rhizobiales', u'f\_\_Rhizobiaceae', u'g\_\_', u's\_\_']  
 cteria', u'o\_\_Neisseriales', u'f\_\_Neisseriaceae', u'g\_\_Vogesella', u's\_\_']  
 >bacteria', u'o\_\_Enterobacteriales', u'f\_\_Enterobacteriaceae', u'g\_\_', u's\_\_']  
 >obiae', u'o\_\_Verrucomicrobiales', u'f\_\_Verrucomicrobiaceae', u'g\_\_Akkermansia', u's\_\_muciniphila']  
 :lostridiales', u'f\_\_Lachnospiraceae', u'g\_\_', u's\_\_']  
 :lostridiales', u'f\_\_Lachnospiraceae', u'g\_\_', u's\_\_']  
 lales', u'f\_\_Staphylococcaceae', u'g\_\_Staphylococcus', u's\_\_']  
 >bacteria', u'o\_\_Enterobacteriales', u'f\_\_Enterobacteriaceae', u'g\_\_Providencia']  
 >bacillales', u'f\_\_Streptococcaceae', u'g\_\_Streptococcus', u's\_\_']  
 'o\_\_Bacteroidales', u'f\_\_Porphyromonadaceae', u'g\_\_Parabacteroides', u's\_\_distasonis']  
 >bacteria', u'o\_\_Enterobacteriales', u'f\_\_Enterobacteriaceae', u'g\_\_', u's\_\_']  
 :lostridiales', u'f\_\_Ruminococcaceae', u'g\_\_Faecalibacterium', u's\_\_prausnitzii']  
 >bacillales', u'f\_\_Enterococcaceae', u'g\_\_Enterococcus', u's\_\_']  
 :lostridiales', u'f\_\_Lachnospiraceae', u'g\_\_Lachnospira', u's\_\_']  
 >bacillales', u'f\_\_Streptococcaceae', u'g\_\_Streptococcus', u's\_\_']  
 >bacteria', u'o\_\_Enterobacteriales', u'f\_\_Enterobacteriaceae', u'g\_\_', u's\_\_']  
 'o\_\_Bacteroidales', u'f\_\_Bacteroidaceae', u'g\_\_Bacteroides', u's\_\_']  
 cteria', u'o\_\_Neisseriales', u'f\_\_Neisseriaceae', u'g\_\_Vogesella', u's\_\_']  
 :lostridiales', u'f\_\_Lachnospiraceae', u'g\_\_Blautia', u's\_\_']  
 'o\_\_Bacteroidales', u'f\_\_Bacteroidaceae', u'g\_\_Bacteroides', u's\_\_']  
 lales', u'f\_\_Staphylococcaceae', u'g\_\_Staphylococcus', u's\_\_aureus']  
 :lostridiales', u'f\_\_Lachnospiraceae', u'g\_\_Lachnospira', u's\_\_']  
 :lostridiales', u'f\_\_Lachnospiraceae', u'g\_\_', u's\_\_']  
 acteria', u'o\_\_Rhodobacterales', u'f\_\_Rhodobacteraceae', u'g\_\_Paracoccus', u's\_\_']  
 :lostridiales', u'f\_\_Lachnospiraceae', u'g\_\_Lachnospira', u's\_\_']  
 >bacillales', u'f\_\_Streptococcaceae', u'g\_\_Lactococcus', u's\_\_']  
 :lostridiales', u'f\_\_Lachnospiraceae']  
 :lostridiales', u'f\_\_Lachnospiraceae', u'g\_\_Blautia', u's\_\_']  
 :lostridiales', u'f\_\_Lachnospiraceae', u'g\_\_Blautia', u's\_\_']  
 :lostridiales', u'f\_\_Lachnospiraceae', u'g\_\_Blautia', u's\_\_']  
 acteria', u'o\_\_Rhizobiales', u'f\_\_', u'g\_\_', u's\_\_']  
 :lostridiales', u'f\_\_Lachnospiraceae']  
 :lostridiales', u'f\_\_Ruminococcaceae', u'g\_\_Anaerotruncus', u's\_\_']  
 acteria', u'o\_\_Sphingomonadales', u'f\_\_Sphingomonadaceae', u'g\_\_Sphingomonas', u's\_\_yabuuchiae']  
 >bacillales', u'f\_\_Streptococcaceae', u'g\_\_Streptococcus', u's\_\_']  
 :lostridiales', u'f\_\_Veillonellaceae', u'g\_\_Veillonella', u's\_\_dispar']  
 'o\_\_Bacteroidales', u'f\_\_Prevotellaceae', u'g\_\_Prevotella', u's\_\_copri']  
 'o\_\_Bacteroidales', u'f\_\_Bacteroidaceae', u'g\_\_Bacteroides', u's\_\_']  
 >bacteria', u'o\_\_Enterobacteriales', u'f\_\_Enterobacteriaceae', u'g\_\_', u's\_\_']  
 >bacteria', u'o\_\_Pseudomonadales', u'f\_\_Moraxellaceae', u'g\_\_', u's\_\_']  
 'o\_\_Bacteroidales', u'f\_\_Bacteroidaceae', u'g\_\_Bacteroides', u's\_\_']  
 >obiae', u'o\_\_Verrucomicrobiales', u'f\_\_Verrucomicrobiaceae', u'g\_\_Akkermansia', u's\_\_muciniphila']  
 :lostridiales', u'f\_\_Lachnospiraceae', u'g\_\_Blautia', u's\_\_']  
 'o\_\_Bacteroidales', u'f\_\_Bacteroidaceae', u'g\_\_Bacteroides', u's\_\_']  
 >bacillales', u'f\_\_Enterococcaceae', u'g\_\_Enterococcus', u's\_\_']  
 'o\_\_Bacteroidales', u'f\_\_Bacteroidaceae', u'g\_\_Bacteroides', u's\_\_']  
 acteria', u'o\_\_Sphingomonadales', u'f\_\_Sphingomonadaceae', u'g\_\_Sphingobium', u's\_\_']  
 >bacteria', u'o\_\_Pseudomonadales', u'f\_\_Moraxellaceae', u'g\_\_Moraxella', u's\_\_']  
 'o\_\_Bacteroidales', u'f\_\_Bacteroidaceae', u'g\_\_Bacteroides', u's\_\_']

cteria', u'o\_\_Burkholderiales', u'f\_\_Alcaligenaceae', u'g\_\_Sutterella', u's\_\_']  
 :lostridiales', u'f\_\_Clostridiaceae', u'g\_\_', u's\_\_']  
 ', u'o\_\_Coriobacteriales', u'f\_\_Coriobacteriaceae', u'g\_\_Collinsella', u's\_\_stercoris']  
 obacteria', u'o\_\_Enterobacteriales', u'f\_\_Enterobacteriaceae', u'g\_\_', u's\_\_']  
 obacteria', u'o\_\_Enterobacteriales', u'f\_\_Enterobacteriaceae', u'g\_\_', u's\_\_']  
 lales', u'f\_\_Staphylococcaceae', u'g\_\_Staphylococcus']  
 cteria', u'o\_\_Burkholderiales', u'f\_\_Comamonadaceae']  
 acteria', u'o\_\_Rhizobiales', u'f\_\_Phyllobacteriaceae', u'g\_\_Phyllobacterium', u's\_\_']  
 'o\_\_Bacteroidales', u'f\_\_Bacteroidaceae', u'g\_\_Bacteroides', u's\_\_']  
 obacillales', u'f\_\_Lactobacillaceae', u'g\_\_Lactobacillus', u's\_\_zeae']  
 obacillales', u'f\_\_Streptococcaceae', u'g\_\_Streptococcus', u's\_\_']  
 :lostridiales', u'f\_\_Lachnospiraceae']  
 :lostridiales', u'f\_\_Lachnospiraceae']  
 obacillales', u'f\_\_Streptococcaceae', u'g\_\_Streptococcus', u's\_\_']  
 obacteria', u'o\_\_Enterobacteriales', u'f\_\_Enterobacteriaceae', u'g\_\_', u's\_\_']  
 o\_\_Erysipelotrichales', u'f\_\_Erysipelotrichaceae', u'g\_\_[Eubacterium]', u's\_\_dolichum']  
 obacillales', u'f\_\_Streptococcaceae', u'g\_\_Streptococcus', u's\_\_']  
 obacteria', u'o\_\_Enterobacteriales', u'f\_\_Enterobacteriaceae', u'g\_\_', u's\_\_']  
 obacillales', u'f\_\_Streptococcaceae', u'g\_\_Streptococcus', u's\_\_']  
 obacteria', u'o\_\_Enterobacteriales', u'f\_\_Enterobacteriaceae', u'g\_\_', u's\_\_']  
 obacteria', u'o\_\_Enterobacteriales', u'f\_\_Enterobacteriaceae', u'g\_\_', u's\_\_']  
 :lostridiales', u'f\_\_Lachnospiraceae', u'g\_\_', u's\_\_']  
 obacillales']  
 'o\_\_Bacteroidales', u'f\_\_Prevotellaceae', u'g\_\_Prevotella', u's\_\_stercorea']  
 'o\_\_Bacteroidales', u'f\_\_[Barnesiellaceae]', u'g\_\_', u's\_\_']  
 :lostridiales', u'f\_\_Ruminococcaceae', u'g\_\_Oscillospira', u's\_\_']  
 obacteria', u'o\_\_Campylobacteriales', u'f\_\_Campylobacteraceae', u'g\_\_Campylobacter', u's\_\_']  
 :lostridiales', u'f\_\_Clostridiaceae', u'g\_\_', u's\_\_']  
 :lostridiales', u'f\_\_Lachnospiraceae', u'g\_\_Dorea', u's\_\_']  
 cteria', u'o\_\_Burkholderiales', u'f\_\_Comamonadaceae', u'g\_\_Limnohabitans', u's\_\_']  
 'o\_\_Bacteroidales', u'f\_\_Bacteroidaceae', u'g\_\_Bacteroides', u's\_\_']  
 :lostridiales', u'f\_\_Clostridiaceae', u'g\_\_', u's\_\_']  
 :lostridiales', u'f\_\_Clostridiaceae', u'g\_\_', u's\_\_']  
 :lostridiales', u'f\_\_Clostridiaceae', u'g\_\_', u's\_\_']  
 acteria', u'o\_\_Desulfovibrionales', u'f\_\_Desulfovibrionaceae', u'g\_\_Bilophila', u's\_\_']  
 obacteria', u'o\_\_Enterobacteriales', u'f\_\_Enterobacteriaceae', u'g\_\_', u's\_\_']  
 lales', u'f\_\_Staphylococcaceae', u'g\_\_Staphylococcus']  
 obacillales', u'f\_\_Streptococcaceae', u'g\_\_Streptococcus', u's\_\_']  
 obacteria', u'o\_\_Enterobacteriales', u'f\_\_Enterobacteriaceae', u'g\_\_', u's\_\_']  
 :lostridiales', u'f\_\_Ruminococcaceae', u'g\_\_', u's\_\_']  
 :lostridiales', u'f\_\_Eubacteriaceae', u'g\_\_Pseudoramibacter\_Eubacterium', u's\_\_']  
 :lostridiales', u'f\_\_Ruminococcaceae', u'g\_\_', u's\_\_']  
 :lostridiales', u'f\_\_Lachnospiraceae', u'g\_\_Lachnospira', u's\_\_']  
 :lostridiales', u'f\_\_Ruminococcaceae', u'g\_\_', u's\_\_']  
 :lostridiales', u'f\_\_Lachnospiraceae', u'g\_\_', u's\_\_']  
 obacteria', u'o\_\_Pseudomonadales', u'f\_\_Pseudomonadaceae', u'g\_\_Pseudomonas', u's\_\_']  
 'o\_\_Bacteroidales', u'f\_\_Prevotellaceae', u'g\_\_Prevotella', u's\_\_melaninogenica']  
 :lostridiales', u'f\_\_', u'g\_\_', u's\_\_']  
 i', u'o\_\_Actinomycetales', u'f\_\_Actinomycetaceae', u'g\_\_Actinomyces', u's\_\_']  
 :lostridiales', u'f\_\_[Tissierellaceae]', u'g\_\_Anaerococcus', u's\_\_']  
 :lostridiales', u'f\_\_Ruminococcaceae', u'g\_\_Faecalibacterium', u's\_\_prausnitzii']  
 'o\_\_Bacteroidales', u'f\_\_Bacteroidaceae', u'g\_\_Bacteroides', u's\_\_']  
 obacillales']  
 obacteria', u'o\_\_Enterobacteriales', u'f\_\_Enterobacteriaceae', u'g\_\_', u's\_\_']  
 ellales', u'f\_\_Gemellaceae', u'g\_\_', u's\_\_']  
 lales', u'f\_\_Staphylococcaceae', u'g\_\_Staphylococcus', u's\_\_aureus']

i', u'o\_\_Bifidobacteriales', u'f\_\_Bifidobacteriaceae', u'g\_\_Bifidobacterium', u's\_\_']  
 'o\_\_Bacteroidales', u'f\_\_Bacteroidaceae', u'g\_\_Bacteroides', u's\_\_']  
 :lostridiales', u'f\_\_Lachnospiraceae', u'g\_\_[Ruminococcus]', u's\_\_gnavus']  
 :lostridiales', u'f\_\_Veillonellaceae', u'g\_\_Veillonella', u's\_\_']  
 :lostridiales', u'f\_\_[Tissierellaceae]', u'g\_\_Anaerococcus', u's\_\_']  
 obacteria', u'o\_\_Pseudomonadales', u'f\_\_Moraxellaceae', u'g\_\_Acinetobacter', u's\_\_']  
 :lostridiales', u'f\_\_Ruminococcaceae']  
 acteria', u'o\_\_Rhodobacterales', u'f\_\_Rhodobacteraceae', u'g\_\_Paracoccus', u's\_\_aminovorans']  
 :lostridiales', u'f\_\_Lachnospiraceae', u'g\_\_Blautia', u's\_\_']  
 :lostridiales', u'f\_\_[Tissierellaceae]', u'g\_\_Peptoniphilus', u's\_\_']  
 lales', u'f\_\_Staphylococcaceae', u'g\_\_Staphylococcus', u's\_\_epidermidis']  
 :lostridiales', u'f\_\_Lachnospiraceae', u'g\_\_Blautia', u's\_\_']  
 i', u'o\_\_Actinomycetales', u'f\_\_Promicromonosporaceae', u'g\_\_Promicromonospora', u's\_\_']  
 lales', u'f\_\_Staphylococcaceae', u'g\_\_Staphylococcus']  
 acteria', u'o\_\_Caulobacterales', u'f\_\_Caulobacteraceae', u'g\_\_', u's\_\_']  
 :lostridiales', u'f\_\_Lachnospiraceae', u'g\_\_Blautia', u's\_\_']  
 i', u'o\_\_Bifidobacteriales', u'f\_\_Bifidobacteriaceae', u'g\_\_Bifidobacterium']  
 lales', u'f\_\_Staphylococcaceae', u'g\_\_Staphylococcus']  
 obacteria', u'o\_\_Enterobacteriales', u'f\_\_Enterobacteriaceae', u'g\_\_', u's\_\_']  
 obacteria', u'o\_\_Enterobacteriales', u'f\_\_Enterobacteriaceae', u'g\_\_', u's\_\_']  
 i', u'o\_\_Actinomycetales', u'f\_\_Actinomycetaceae', u'g\_\_Actinomyces', u's\_\_']  
 :lostridiales', u'f\_\_Veillonellaceae', u'g\_\_Veillonella', u's\_\_']  
 obacteria', u'o\_\_Pseudomonadales', u'f\_\_Moraxellaceae', u'g\_\_Moraxella', u's\_\_']  
 :lostridiales', u'f\_\_Lachnospiraceae', u'g\_\_', u's\_\_']  
 lales', u'f\_\_[Exiguobacteraceae]', u'g\_\_Exiguobacterium', u's\_\_']  
 lales', u'f\_\_Staphylococcaceae', u'g\_\_Staphylococcus', u's\_\_']  
 obacteria', u'o\_\_Pseudomonadales', u'f\_\_Pseudomonadaceae', u'g\_\_Pseudomonas', u's\_\_']  
 obacteria', u'o\_\_Enterobacteriales', u'f\_\_Enterobacteriaceae', u'g\_\_', u's\_\_']  
 obacillales', u'f\_\_Streptococcaceae', u'g\_\_Streptococcus', u's\_\_']  
 :lostridiales', u'f\_\_Lachnospiraceae', u'g\_\_Blautia', u's\_\_']  
 obacteria', u'o\_\_Enterobacteriales', u'f\_\_Enterobacteriaceae', u'g\_\_', u's\_\_']  
 :lostridiales', u'f\_\_Lachnospiraceae', u'g\_\_', u's\_\_']  
 :lostridiales', u'f\_\_Lachnospiraceae', u'g\_\_Blautia', u's\_\_producta']  
 acteria', u'o\_\_Burkholderiales', u'f\_\_Comamonadaceae', u'g\_\_', u's\_\_']  
 i', u'o\_\_Actinomycetales', u'f\_\_Corynebacteriaceae', u'g\_\_Corynebacterium', u's\_\_']  
 lales', u'f\_\_Staphylococcaceae', u'g\_\_Staphylococcus']  
 obacteria', u'o\_\_Enterobacteriales', u'f\_\_Enterobacteriaceae', u'g\_\_', u's\_\_']  
 'o\_\_Bacteroidales', u'f\_\_Prevotellaceae', u'g\_\_Prevotella', u's\_\_melaninogenica']  
 obacillales', u'f\_\_Lactobacillaceae', u'g\_\_Lactobacillus', u's\_\_']  
 acteria', u'o\_\_Sphingomonadales', u'f\_\_Sphingomonadaceae', u'g\_\_', u's\_\_']  
 acteria', u'o\_\_Neisseriales', u'f\_\_Neisseriaceae', u'g\_\_Neisseria']  
 :lostridiales', u'f\_\_Ruminococcaceae', u'g\_\_Faecalibacterium', u's\_\_prausnitzii']  
 :lostridiales', u'f\_\_Veillonellaceae', u'g\_\_Veillonella', u's\_\_dispar']  
 :lostridiales', u'f\_\_Lachnospiraceae', u'g\_\_[Ruminococcus]']  
 :lostridiales', u'f\_\_Lachnospiraceae', u'g\_\_Blautia', u's\_\_']  
 obacteria', u'o\_\_Pseudomonadales', u'f\_\_Moraxellaceae', u'g\_\_Moraxella', u's\_\_']  
 :lostridiales', u'f\_\_Ruminococcaceae', u'g\_\_', u's\_\_']  
 \_\_YS2', u'f\_\_', u'g\_\_', u's\_\_']  
 :lostridiales', u'f\_\_Lachnospiraceae', u'g\_\_Blautia', u's\_\_']  
 :lostridiales', u'f\_\_Clostridiaceae', u'g\_\_', u's\_\_']  
 i', u'o\_\_Bifidobacteriales', u'f\_\_Bifidobacteriaceae', u'g\_\_Bifidobacterium']  
 i', u'o\_\_Actinomycetales', u'f\_\_Micrococcaceae', u'g\_\_Microbispora', u's\_\_rosea']  
 :lostridiales', u'f\_\_Lachnospiraceae', u'g\_\_[Ruminococcus]', u's\_\_gnavus']  
 :lostridiales', u'f\_\_Lachnospiraceae']  
 'o\_\_Bacteroidales', u'f\_\_Bacteroidaceae', u'g\_\_Bacteroides', u's\_\_']  
 :lostridiales', u'f\_\_Lachnospiraceae', u'g\_\_Coprococcus', u's\_\_']

cteria', u'o\_\_Burkholderiales', u'f\_\_Comamonadaceae', u'g\_\_Delftia', u's\_\_']  
 :lostridiales', u'f\_\_Veillonellaceae', u'g\_\_Veillonella', u's\_\_dispar']  
 :lostridiales', u'f\_\_Clostridiaceae', u'g\_\_Clostridium', u's\_\_']  
 'o\_\_Bacteroidales', u'f\_\_Bacteroidaceae', u'g\_\_Bacteroides', u's\_\_']  
 obacteria', u'o\_\_Enterobacteriales', u'f\_\_Enterobacteriaceae', u'g\_\_', u's\_\_']  
 :lostridiales', u'f\_\_Lachnospiraceae', u'g\_\_Dorea', u's\_\_']  
 :lostridiales', u'f\_\_Eubacteriaceae', u'g\_\_Pseudoramibacter\_Eubacterium', u's\_\_']  
 :lostridiales', u'f\_\_Ruminococcaceae', u'g\_\_', u's\_\_']  
 cteria', u'o\_\_Burkholderiales', u'f\_\_Oxalobacteraceae', u'g\_\_', u's\_\_']  
 t', u'o\_\_Actinomycetales', u'f\_\_Actinomycetaceae', u'g\_\_Actinomyces', u's\_\_']  
 'o\_\_Bacteroidales', u'f\_\_Bacteroidaceae', u'g\_\_Bacteroides', u's\_\_']  
 'o\_\_Bacteroidales', u'f\_\_Bacteroidaceae', u'g\_\_Bacteroides', u's\_\_']  
 :lostridiales', u'f\_\_Lachnospiraceae', u'g\_\_', u's\_\_']  
 obacillales', u'f\_\_Streptococcaceae', u'g\_\_Streptococcus', u's\_\_']  
 obacteria', u'o\_\_Pseudomonadales', u'f\_\_Pseudomonadaceae']  
 obacillales', u'f\_\_Lactobacillaceae', u'g\_\_Lactobacillus', u's\_\_']  
 :lostridiales', u'f\_\_Lachnospiraceae', u'g\_\_Dorea', u's\_\_']  
 :lostridiales', u'f\_\_Ruminococcaceae', u'g\_\_Oscillospira', u's\_\_']  
 acteria', u'o\_\_Sphingomonadales', u'f\_\_Sphingomonadaceae', u'g\_\_Novosphingobium', u's\_\_']  
 obacillales', u'f\_\_Streptococcaceae', u'g\_\_Streptococcus', u's\_\_']  
 cteria', u'o\_\_Burkholderiales', u'f\_\_Oxalobacteraceae', u'g\_\_', u's\_\_']  
 obacillales', u'f\_\_Lactobacillaceae', u'g\_\_Lactobacillus', u's\_\_zeae']  
 t', u'o\_\_Bifidobacteriales', u'f\_\_Bifidobacteriaceae', u'g\_\_Bifidobacterium', u's\_\_']  
 :lostridiales', u'f\_\_Clostridiaceae', u'g\_\_', u's\_\_']  
 obacillales', u'f\_\_Streptococcaceae', u'g\_\_Streptococcus', u's\_\_']  
 obacillales', u'f\_\_Enterococcaceae', u'g\_\_Enterococcus', u's\_\_']  
 :lostridiales', u'f\_\_', u'g\_\_', u's\_\_']  
 :lostridiales', u'f\_\_Ruminococcaceae']  
 acteria', u'o\_\_Rhodobacterales', u'f\_\_Rhodobacteraceae', u'g\_\_Paracoccus', u's\_\_aminovorans']  
 lales', u'f\_\_Staphylococcaceae', u'g\_\_Staphylococcus', u's\_\_']  
 obacteria', u'o\_\_Pasteurellales', u'f\_\_Pasteurellaceae', u'g\_\_Haemophilus', u's\_\_parainfluenzae']  
 cteria', u'o\_\_Burkholderiales', u'f\_\_Comamonadaceae', u'g\_\_', u's\_\_']  
 'o\_\_Bacteroidales', u'f\_\_Bacteroidaceae', u'g\_\_Bacteroides', u's\_\_']  
 obacteria', u'o\_\_Enterobacteriales', u'f\_\_Enterobacteriaceae', u'g\_\_', u's\_\_']  
 :lostridiales', u'f\_\_Ruminococcaceae', u'g\_\_', u's\_\_']  
 cteria', u'o\_\_Burkholderiales', u'f\_\_Oxalobacteraceae', u'g\_\_', u's\_\_']  
 :lostridiales', u'f\_\_Clostridiaceae', u'g\_\_', u's\_\_']  
 :lostridiales', u'f\_\_Lachnospiraceae', u'g\_\_[Ruminococcus]', u's\_\_gnavus']  
 cteria', u'o\_\_Burkholderiales', u'f\_\_Comamonadaceae', u'g\_\_', u's\_\_']  
 t', u'o\_\_Bifidobacteriales', u'f\_\_Bifidobacteriaceae', u'g\_\_', u's\_\_']  
 t', u'o\_\_Actinomycetales', u'f\_\_Corynebacteriaceae', u'g\_\_Corynebacterium', u's\_\_']  
 lales', u'f\_\_Staphylococcaceae', u'g\_\_Staphylococcus', u's\_\_']  
 :lostridiales', u'f\_\_Veillonellaceae', u'g\_\_Veillonella', u's\_\_dispar']  
 obacteria', u'o\_\_Enterobacteriales', u'f\_\_Enterobacteriaceae', u'g\_\_', u's\_\_']  
 :lostridiales', u'f\_\_Veillonellaceae', u'g\_\_Veillonella', u's\_\_dispar']  
 t', u'o\_\_Actinomycetales', u'f\_\_Corynebacteriaceae', u'g\_\_Corynebacterium', u's\_\_']  
 obacillales', u'f\_\_Streptococcaceae', u'g\_\_Streptococcus', u's\_\_']  
 obacillales', u'f\_\_Streptococcaceae', u'g\_\_Streptococcus', u's\_\_']  
 :lostridiales', u'f\_\_Lachnospiraceae', u'g\_\_Coprococcus', u's\_\_']  
 'o\_\_Bacteroidales', u'f\_\_Bacteroidaceae', u'g\_\_Bacteroides', u's\_\_']  
 :lostridiales', u'f\_\_Ruminococcaceae', u'g\_\_', u's\_\_']  
 obacillales', u'f\_\_Streptococcaceae', u'g\_\_Streptococcus', u's\_\_']  
 :lostridiales', u'f\_\_Lachnospiraceae', u'g\_\_', u's\_\_']  
 'o\_\_Bacteroidales', u'f\_\_Porphyromonadaceae', u'g\_\_Porphyromonas', u's\_\_']  
 :lostridiales', u'f\_\_Lachnospiraceae', u'g\_\_Dorea', u's\_\_']  
 :lostridiales', u'f\_\_Veillonellaceae', u'g\_\_Megasphaera', u's\_\_']

ɔ\_\_Erysipelotrichales', u'f\_\_Erysipelotrichaceae', u'g\_\_[Eubacterium]', u's\_\_dolichum']  
 :lostridiales', u'f\_\_Veillonellaceae', u'g\_\_Phascolarctobacterium', u's\_\_']  
 ɔ\_\_Erysipelotrichales', u'f\_\_Erysipelotrichaceae', u'g\_\_', u's\_\_']  
 t', u'o\_\_Actinomycetales', u'f\_\_Geodermatophilaceae']  
 ɔbacillales', u'f\_\_Streptococcaceae', u'g\_\_Streptococcus', u's\_\_']  
 ɔbacteria', u'o\_\_Enterobacteriales', u'f\_\_Enterobacteriaceae', u'g\_\_', u's\_\_']  
 :lostridiales', u'f\_\_Lachnospiraceae', u'g\_\_Blautia', u's\_\_producta']  
 lales', u'f\_\_Staphylococcaceae', u'g\_\_Staphylococcus']  
 :lostridiales', u'f\_\_Lachnospiraceae']  
 ɔbacteria', u'o\_\_Enterobacteriales', u'f\_\_Enterobacteriaceae', u'g\_\_Klebsiella', u's\_\_']  
 acteria', u'o\_\_Rhodospirillales', u'f\_\_Rhodospirillaceae', u'g\_\_', u's\_\_']  
 :lostridiales', u'f\_\_Lachnospiraceae', u'g\_\_', u's\_\_']  
 ɔbacillales', u'f\_\_Enterococcaceae', u'g\_\_Enterococcus', u's\_\_']  
 'o\_\_Bacteroidales', u'f\_\_Bacteroidaceae', u'g\_\_Bacteroides', u's\_\_fragilis']  
 ɔbacillales', u'f\_\_Streptococcaceae', u'g\_\_Streptococcus', u's\_\_']  
 ɔbacteria', u'o\_\_Xanthomonadales', u'f\_\_Xanthomonadaceae', u'g\_\_Stenotrophomonas', u's\_\_']  
 ɔbacillales', u'f\_\_Streptococcaceae', u'g\_\_Streptococcus', u's\_\_']  
 acteria', u'o\_\_Burkholderiales', u'f\_\_Comamonadaceae', u'g\_\_', u's\_\_']  
 'o\_\_Bacteroidales', u'f\_\_Bacteroidaceae', u'g\_\_Bacteroides', u's\_\_']  
 t', u'o\_\_Actinomycetales', u'f\_\_Corynebacteriaceae', u'g\_\_Corynebacterium', u's\_\_']  
 :lostridiales', u'f\_\_Lachnospiraceae', u'g\_\_', u's\_\_']  
 :lostridiales', u'f\_\_Lachnospiraceae', u'g\_\_Dorea', u's\_\_']  
 acteria', u'o\_\_Rhodospirillales', u'f\_\_Rhodospirillaceae', u'g\_\_Azospirillum', u's\_\_']  
 ɔbacteria', u'o\_\_Enterobacteriales', u'f\_\_Enterobacteriaceae', u'g\_\_', u's\_\_']  
 'o\_\_Bacteroidales', u'f\_\_[Paraprevotellaceae]', u'g\_\_Paraprevotella', u's\_\_']  
 ɔbacteria', u'o\_\_Pseudomonadales', u'f\_\_Moraxellaceae', u'g\_\_Acinetobacter', u's\_\_']  
 :lostridiales', u'f\_\_Veillonellaceae', u'g\_\_Megasphaera', u's\_\_']  
 acteria', u'o\_\_Rhizobiales', u'f\_\_Rhizobiaceae', u'g\_\_Agrobacterium', u's\_\_']  
 :lostridiales', u'f\_\_Ruminococcaceae', u'g\_\_Faecalibacterium', u's\_\_prausnitzii']  
 t', u'o\_\_Actinomycetales', u'f\_\_Pseudonocardiaceae', u'g\_\_Pseudonocardia', u's\_\_']  
 'o\_\_Bacteroidales', u'f\_\_Porphyromonadaceae', u'g\_\_Porphyromonas', u's\_\_']  
 ɔbacteria', u'o\_\_Pseudomonadales', u'f\_\_Pseudomonadaceae', u'g\_\_Pseudomonas', u's\_\_']  
 :lostridiales', u'f\_\_Lachnospiraceae', u'g\_\_', u's\_\_']  
 ɔbacillales', u'f\_\_Carnobacteriaceae', u'g\_\_Granulicatella', u's\_\_']  
 'o\_\_Bacteroidales', u'f\_\_Bacteroidaceae', u'g\_\_Bacteroides', u's\_\_']  
 :lostridiales', u'f\_\_Clostridiaceae', u'g\_\_', u's\_\_']  
 :lostridiales', u'f\_\_Clostridiaceae', u'g\_\_', u's\_\_']  
 :lostridiales', u'f\_\_Clostridiaceae', u'g\_\_', u's\_\_']  
 ɔbacillales', u'f\_\_Streptococcaceae', u'g\_\_Streptococcus', u's\_\_']  
 ɔbacillales', u'f\_\_Streptococcaceae', u'g\_\_Streptococcus', u's\_\_']  
 acteria', u'o\_\_Rhodobacterales', u'f\_\_Rhodobacteraceae', u'g\_\_Paracoccus', u's\_\_']  
 'o\_\_Bacteroidales', u'f\_\_[Paraprevotellaceae]', u'g\_\_Paraprevotella', u's\_\_']  
 :lostridiales', u'f\_\_Lachnospiraceae', u'g\_\_Coprococcus', u's\_\_']  
 ɔ\_\_Erysipelotrichales', u'f\_\_Erysipelotrichaceae', u'g\_\_Coprobacillus', u's\_\_']  
 :lostridiales', u'f\_\_', u'g\_\_', u's\_\_']  
 t', u'o\_\_Actinomycetales', u'f\_\_Nocardioideaceae', u'g\_\_', u's\_\_']  
 lales', u'f\_\_Staphylococcaceae', u'g\_\_Staphylococcus']  
 :lostridiales', u'f\_\_Lachnospiraceae', u'g\_\_', u's\_\_']  
 acteria', u'o\_\_Rhizobiales', u'f\_\_Methylobacteriaceae', u'g\_\_', u's\_\_']  
 'o\_\_Bacteroidales', u'f\_\_Bacteroidaceae', u'g\_\_Bacteroides', u's\_\_']  
 :lostridiales', u'f\_\_Veillonellaceae', u'g\_\_Veillonella', u's\_\_parvula']  
 u'o\_\_Fusobacteriales', u'f\_\_Fusobacteriaceae', u'g\_\_Fusobacterium', u's\_\_']  
 ɔbacillales', u'f\_\_Lactobacillaceae', u'g\_\_Lactobacillus', u's\_\_zeae']  
 :lostridiales', u'f\_\_Lachnospiraceae', u'g\_\_', u's\_\_']  
 :lostridiales', u'f\_\_Ruminococcaceae', u'g\_\_', u's\_\_']  
 , u'o\_\_Flavobacteriales', u'f\_\_[Weeksellaceae]', u'g\_\_Wautersiella', u's\_\_']



i', u'o\_\_Actinomycetales', u'f\_\_Kineosporiaceae', u'g\_\_', u's\_\_']  
 :lostridiales', u'f\_\_Lachnospiraceae', u'g\_\_Blautia', u's\_\_']  
 >bacteria', u'o\_\_Enterobacteriales', u'f\_\_Enterobacteriaceae', u'g\_\_', u's\_\_']  
 'o\_\_Bacteroidales', u'f\_\_Porphyromonadaceae', u'g\_\_Parabacteroides', u's\_\_distasonis']  
 :lostridiales', u'f\_\_Lachnospiraceae', u'g\_\_Blautia', u's\_\_']  
 acteria', u'o\_\_Rhizobiales', u'f\_\_Phyllobacteriaceae', u'g\_\_Phyllobacterium', u's\_\_']  
 :lostridiales', u'f\_\_Lachnospiraceae', u'g\_\_Roseburia', u's\_\_']  
 >bacteria', u'o\_\_Enterobacteriales', u'f\_\_Enterobacteriaceae', u'g\_\_', u's\_\_']  
 lales', u'f\_\_Staphylococcaceae', u'g\_\_Staphylococcus', u's\_\_aureus']  
 i', u'o\_\_Actinomycetales', u'f\_\_Corynebacteriaceae', u'g\_\_Corynebacterium', u's\_\_']  
 lales', u'f\_\_Bacillaceae', u'g\_\_Bacillus', u's\_\_']  
 'o\_\_Bacteroidales', u'f\_\_Bacteroidaceae', u'g\_\_Bacteroides', u's\_\_']  
 >bacillales', u'f\_\_Enterococcaceae', u'g\_\_Enterococcus', u's\_\_']  
 :lostridiales', u'f\_\_Lachnospiraceae', u'g\_\_', u's\_\_']  
 'o\_\_Bacteroidales', u'f\_\_[Barnesiellaceae]', u'g\_\_', u's\_\_']  
 :lostridiales', u'f\_\_Lachnospiraceae', u'g\_\_[Ruminococcus]', u's\_\_gnavus']  
 >bacillales', u'f\_\_Streptococcaceae', u'g\_\_Streptococcus', u's\_\_']  
 :lostridiales', u'f\_\_Lachnospiraceae', u'g\_\_Roseburia', u's\_\_']  
 lales', u'f\_\_Staphylococcaceae', u'g\_\_Staphylococcus']  
 >bacillales', u'f\_\_Streptococcaceae', u'g\_\_Streptococcus', u's\_\_']  
 :lostridiales', u'f\_\_Ruminococcaceae', u'g\_\_Faecalibacterium', u's\_\_prausnitzii']  
 >bacillales', u'f\_\_Streptococcaceae', u'g\_\_Streptococcus', u's\_\_']  
 'o\_\_Bacteroidales', u'f\_\_Bacteroidaceae', u'g\_\_Bacteroides', u's\_\_']  
 >bacteria', u'o\_\_Enterobacteriales', u'f\_\_Enterobacteriaceae', u'g\_\_', u's\_\_']  
 'o\_\_Bacteroidales', u'f\_\_Bacteroidaceae', u'g\_\_Bacteroides', u's\_\_']  
 i', u'o\_\_Bifidobacteriales', u'f\_\_Bifidobacteriaceae', u'g\_\_Bifidobacterium', u's\_\_']  
 >bacteria', u'o\_\_Pseudomonadales', u'f\_\_Pseudomonadaceae', u'g\_\_Pseudomonas', u's\_\_']  
 >bacillales', u'f\_\_Streptococcaceae', u'g\_\_Streptococcus', u's\_\_']  
 lales', u'f\_\_Staphylococcaceae', u'g\_\_Staphylococcus', u's\_\_']  
 i', u'o\_\_Actinomycetales', u'f\_\_Mycobacteriaceae', u'g\_\_Mycobacterium', u's\_\_']  
 i', u'o\_\_Bifidobacteriales', u'f\_\_Bifidobacteriaceae', u'g\_\_Bifidobacterium', u's\_\_']  
 'o\_\_Bacteroidales', u'f\_\_Bacteroidaceae', u'g\_\_Bacteroides', u's\_\_']  
 >bacillales', u'f\_\_Streptococcaceae', u'g\_\_Streptococcus', u's\_\_']  
 >bacillales', u'f\_\_Streptococcaceae', u'g\_\_Streptococcus', u's\_\_']  
 >bacillales', u'f\_\_Streptococcaceae', u'g\_\_Streptococcus', u's\_\_']  
 cteria', u'o\_\_Burkholderiales', u'f\_\_Oxalobacteraceae', u'g\_\_', u's\_\_']  
 >bacillales', u'f\_\_Streptococcaceae', u'g\_\_Streptococcus', u's\_\_']  
 cteria', u'o\_\_Neisseriales', u'f\_\_Neisseriaceae', u'g\_\_', u's\_\_']  
 :lostridiales', u'f\_\_Lachnospiraceae', u'g\_\_', u's\_\_']  
 'o\_\_Bacteroidales', u'f\_\_Bacteroidaceae', u'g\_\_Bacteroides', u's\_\_fragilis']  
 lales', u'f\_\_Staphylococcaceae', u'g\_\_Staphylococcus']  
 >bacteria', u'o\_\_Pasteurellales', u'f\_\_Pasteurellaceae', u'g\_\_Haemophilus', u's\_\_']  
 :lostridiales', u'f\_\_Lachnospiraceae', u'g\_\_Blautia', u's\_\_']  
 i', u'o\_\_Actinomycetales', u'f\_\_Corynebacteriaceae', u'g\_\_Corynebacterium', u's\_\_']  
 >bacillales', u'f\_\_Enterococcaceae', u'g\_\_Enterococcus', u's\_\_']  
 :lostridiales', u'f\_\_Veillonellaceae', u'g\_\_Veillonella', u's\_\_parvula']  
 :lostridiales', u'f\_\_Veillonellaceae', u'g\_\_Megasphaera', u's\_\_']  
 >bacteria', u'o\_\_Enterobacteriales', u'f\_\_Enterobacteriaceae', u'g\_\_', u's\_\_']  
 >bacteria', u'o\_\_Enterobacteriales', u'f\_\_Enterobacteriaceae', u'g\_\_', u's\_\_']  
 >bacillales', u'f\_\_Streptococcaceae', u'g\_\_Streptococcus', u's\_\_']  
 >bacteria', u'o\_\_Enterobacteriales', u'f\_\_Enterobacteriaceae', u'g\_\_', u's\_\_']  
 cteria', u'o\_\_Neisseriales', u'f\_\_Neisseriaceae', u'g\_\_', u's\_\_']  
 >bacteria', u'o\_\_Pseudomonadales', u'f\_\_Pseudomonadaceae', u'g\_\_Pseudomonas', u's\_\_balearica']  
 :lostridiales', u'f\_\_Lachnospiraceae', u'g\_\_[Ruminococcus]', u's\_\_gnavus']  
 >bacillales', u'f\_\_Streptococcaceae', u'g\_\_Streptococcus', u's\_\_']  
 i', u'o\_\_Actinomycetales', u'f\_\_Corynebacteriaceae', u'g\_\_Corynebacterium', u's\_\_']

>bacteria', u'o\_\_Pseudomonadales', u'f\_\_Pseudomonadaceae', u'g\_\_Pseudomonas', u's\_\_']  
 >bacillales', u'f\_\_Streptococcaceae', u'g\_\_Streptococcus', u's\_\_']  
 >bacillales', u'f\_\_Streptococcaceae', u'g\_\_Streptococcus', u's\_\_']  
 >bacillales', u'f\_\_Streptococcaceae', u'g\_\_Streptococcus', u's\_\_']  
 >bacteria', u'o\_\_Enterobacteriales', u'f\_\_Enterobacteriaceae', u'g\_\_Serratia', u's\_\_marcescens']  
 i', u'o\_\_Bifidobacteriales', u'f\_\_Bifidobacteriaceae', u'g\_\_Bifidobacterium', u's\_\_']  
 >bacillales', u'f\_\_Streptococcaceae', u'g\_\_Streptococcus', u's\_\_']  
 i', u'o\_\_Actinomycetales', u'f\_\_Corynebacteriaceae', u'g\_\_Corynebacterium', u's\_\_']  
 :lostridiales', u'f\_\_Lachnospiraceae', u'g\_\_[Ruminococcus]', u's\_\_gnavus']  
 >bacillales', u'f\_\_Streptococcaceae', u'g\_\_Streptococcus', u's\_\_']  
 i', u'o\_\_Bifidobacteriales', u'f\_\_Bifidobacteriaceae', u'g\_\_Bifidobacterium', u's\_\_']  
 :lostridiales', u'f\_\_Veillonellaceae', u'g\_\_Megamonas', u's\_\_']  
 :lostridiales', u'f\_\_[Tissierellaceae]', u'g\_\_Anaerococcus', u's\_\_']  
 >bacillales', u'f\_\_Aerococcaceae', u'g\_\_Alloiococcus', u's\_\_']  
 i', u'o\_\_Bifidobacteriales', u'f\_\_Bifidobacteriaceae', u'g\_\_Bifidobacterium', u's\_\_adolescentis']  
 >bacillales', u'f\_\_Streptococcaceae', u'g\_\_Streptococcus', u's\_\_infantis']  
 i', u'o\_\_Actinomycetales', u'f\_\_Corynebacteriaceae', u'g\_\_Corynebacterium', u's\_\_']  
 >bacteria', u'o\_\_Burkholderiales', u'f\_\_Comamonadaceae', u'g\_\_', u's\_\_']  
 >bacteria', u'o\_\_Enterobacteriales', u'f\_\_Enterobacteriaceae', u'g\_\_', u's\_\_']  
 :lostridiales', u'f\_\_Lachnospiraceae', u'g\_\_', u's\_\_']  
 >o\_\_Bacteroidales', u'f\_\_Bacteroidaceae', u'g\_\_Bacteroides', u's\_\_']  
 >bacillales', u'f\_\_Streptococcaceae', u'g\_\_Streptococcus', u's\_\_']  
 :lostridiales', u'f\_\_Lachnospiraceae']  
 >o\_\_Bacteroidales', u'f\_\_Porphyromonadaceae', u'g\_\_Parabacteroides', u's\_\_distasonis']  
 :lostridiales', u'f\_\_Lachnospiraceae', u'g\_\_[Ruminococcus]', u's\_\_']  
 i', u'o\_\_Actinomycetales', u'f\_\_Micrococcaceae', u'g\_\_Rothia', u's\_\_mucilaginososa']  
 >o\_\_Bacteroidales', u'f\_\_Bacteroidaceae', u'g\_\_Bacteroides', u's\_\_']  
 >alales', u'f\_\_Planococcaceae', u'g\_\_', u's\_\_']  
 >o\_\_Bacteroidales', u'f\_\_Bacteroidaceae', u'g\_\_Bacteroides', u's\_\_fragilis']  
 :lostridiales', u'f\_\_Ruminococcaceae', u'g\_\_Oscillospira', u's\_\_']  
 :lostridiales', u'f\_\_Lachnospiraceae', u'g\_\_Blautia', u's\_\_']  
 :lostridiales', u'f\_\_Lachnospiraceae', u'g\_\_', u's\_\_']  
 >bacillales', u'f\_\_Streptococcaceae', u'g\_\_Streptococcus', u's\_\_']  
 >bacillales']  
 >bacillales', u'f\_\_Streptococcaceae', u'g\_\_Streptococcus', u's\_\_']  
 i', u'o\_\_Bifidobacteriales', u'f\_\_Bifidobacteriaceae', u'g\_\_Bifidobacterium', u's\_\_adolescentis']  
 >bacteria', u'o\_\_Enterobacteriales', u'f\_\_Enterobacteriaceae', u'g\_\_', u's\_\_']  
 i', u'o\_\_Actinomycetales', u'f\_\_Nocardoidaceae', u'g\_\_', u's\_\_']  
 :lostridiales', u'f\_\_Clostridiaceae', u'g\_\_', u's\_\_']  
 >bacillales', u'f\_\_Streptococcaceae', u'g\_\_Streptococcus', u's\_\_']  
 >bacillales', u'f\_\_Enterococcaceae', u'g\_\_Enterococcus', u's\_\_']  
 >bacteria', u'o\_\_Pasteurellales', u'f\_\_Pasteurellaceae', u'g\_\_Haemophilus', u's\_\_']  
 >bacteria', u'o\_\_Enterobacteriales', u'f\_\_Enterobacteriaceae', u'g\_\_', u's\_\_']  
 i', u'o\_\_Actinomycetales', u'f\_\_Corynebacteriaceae', u'g\_\_Corynebacterium', u's\_\_']  
 :lostridiales', u'f\_\_Veillonellaceae', u'g\_\_Megasphaera', u's\_\_']  
 >acteria', u'o\_\_Rhizobiales', u'f\_\_Phyllobacteriaceae', u'g\_\_Phyllobacterium', u's\_\_']  
 >bacillales', u'f\_\_Aerococcaceae', u'g\_\_Alloiococcus', u's\_\_']  
 :lostridiales', u'f\_\_Veillonellaceae']  
 >bacteria', u'o\_\_Enterobacteriales', u'f\_\_Enterobacteriaceae', u'g\_\_', u's\_\_']  
 >acteria', u'o\_\_Rhizobiales', u'f\_\_Hyphomicrobiaceae', u'g\_\_Devosia', u's\_\_']  
 >bacillales', u'f\_\_Enterococcaceae']  
 :lostridiales', u'f\_\_Clostridiaceae', u'g\_\_', u's\_\_']  
 >\_\_Erysipelotrichales', u'f\_\_Erysipelotrichaceae', u'g\_\_', u's\_\_']  
 >bacteria', u'o\_\_Pseudomonadales', u'f\_\_Moraxellaceae', u'g\_\_Moraxella', u's\_\_']  
 :lostridiales', u'f\_\_Ruminococcaceae', u'g\_\_Oscillospira', u's\_\_']  
 >bacillales', u'f\_\_Streptococcaceae', u'g\_\_Streptococcus', u's\_\_']

i', u'o\_\_Actinomycetales', u'f\_\_Nocardioideae', u'g\_\_', u's\_\_']  
 >bacteria', u'o\_\_Enterobacteriales', u'f\_\_Enterobacteriaceae', u'g\_\_', u's\_\_']  
 >bacillales', u'f\_\_Streptococcaceae', u'g\_\_Streptococcus', u's\_\_']  
 >bacteria', u'o\_\_Pasteurellales', u'f\_\_Pasteurellaceae', u'g\_\_Haemophilus', u's\_\_']  
 :lostridiales', u'f\_\_Lachnospiraceae', u'g\_\_Blautia', u's\_\_producta']  
 >bacillales', u'f\_\_Streptococcaceae', u'g\_\_Streptococcus', u's\_\_']  
 ', u'o\_\_Coriobacteriales', u'f\_\_Coriobacteriaceae', u'g\_\_Collinsella', u's\_\_stercoris']  
 >bacteria', u'o\_\_Enterobacteriales', u'f\_\_Enterobacteriaceae', u'g\_\_', u's\_\_']  
 i', u'o\_\_Actinomycetales', u'f\_\_Corynebacteriaceae', u'g\_\_Corynebacterium', u's\_\_']  
 >bacteria', u'o\_\_Pasteurellales', u'f\_\_Pasteurellaceae', u'g\_\_Haemophilus', u's\_\_']  
 :lostridiales', u'f\_\_[Tissierellaceae]', u'g\_\_Finegoldia', u's\_\_']  
 >bacillales', u'f\_\_Enterococcaceae', u'g\_\_Enterococcus', u's\_\_']  
 lales', u'f\_\_Staphylococcaceae', u'g\_\_Staphylococcus', u's\_\_']  
 i', u'o\_\_Actinomycetales', u'f\_\_Micrococcaceae', u'g\_\_Rothia', u's\_\_mucilaginosae']  
 >bacillales']  
 i', u'o\_\_Actinomycetales', u'f\_\_Corynebacteriaceae', u'g\_\_Corynebacterium', u's\_\_']  
 :lostridiales', u'f\_\_Ruminococcaceae', u'g\_\_', u's\_\_']  
 :lostridiales', u'f\_\_Lachnospiraceae']  
 >bacillales', u'f\_\_Streptococcaceae', u'g\_\_Streptococcus', u's\_\_']  
 i', u'o\_\_Actinomycetales', u'f\_\_Micrococcaceae', u'g\_\_Rothia', u's\_\_mucilaginosae']  
 :lostridiales', u'f\_\_Lachnospiraceae', u'g\_\_', u's\_\_']  
 >bacillales', u'f\_\_Streptococcaceae', u'g\_\_Lactococcus', u's\_\_']  
 >bacillales', u'f\_\_Streptococcaceae', u'g\_\_Streptococcus', u's\_\_']  
 >bacteria', u'o\_\_Enterobacteriales', u'f\_\_Enterobacteriaceae', u'g\_\_', u's\_\_']  
 cteria', u'o\_\_Burkholderiales', u'f\_\_Comamonadaceae', u'g\_\_', u's\_\_']  
 i', u'o\_\_Actinomycetales', u'f\_\_Corynebacteriaceae', u'g\_\_Corynebacterium', u's\_\_']  
 :lostridiales', u'f\_\_Veillonellaceae', u'g\_\_Dialister', u's\_\_']  
 i', u'o\_\_Bifidobacteriales', u'f\_\_Bifidobacteriaceae', u'g\_\_Bifidobacterium', u's\_\_']  
 cteria', u'o\_\_Burkholderiales', u'f\_\_Oxalobacteraceae', u'g\_\_', u's\_\_']  
 :lostridiales', u'f\_\_Clostridiaceae', u'g\_\_', u's\_\_']  
 :lostridiales', u'f\_\_Veillonellaceae', u'g\_\_Veillonella', u's\_\_dispar']  
 'o\_\_Bacteroidales', u'f\_\_Bacteroidaceae', u'g\_\_Bacteroides', u's\_\_ovatus']  
 >bacteria', u'o\_\_Enterobacteriales', u'f\_\_Enterobacteriaceae', u'g\_\_Klebsiella', u's\_\_']  
 :lostridiales', u'f\_\_Lachnospiraceae']  
 >bacteria', u'o\_\_Enterobacteriales', u'f\_\_Enterobacteriaceae', u'g\_\_', u's\_\_']  
 :lostridiales', u'f\_\_Veillonellaceae', u'g\_\_Megasphaera', u's\_\_']  
 :lostridiales', u'f\_\_Clostridiaceae', u'g\_\_', u's\_\_']  
 >bacteria', u'o\_\_Enterobacteriales', u'f\_\_Enterobacteriaceae', u'g\_\_', u's\_\_']  
 lales', u'f\_\_Staphylococcaceae', u'g\_\_Staphylococcus', u's\_\_epidermidis']  
 'o\_\_Bacteroidales', u'f\_\_Bacteroidaceae', u'g\_\_Bacteroides', u's\_\_fragilis']  
 i', u'o\_\_Actinomycetales', u'f\_\_Corynebacteriaceae', u'g\_\_Corynebacterium', u's\_\_']  
 'o\_\_Bacteroidales', u'f\_\_Porphyromonadaceae', u'g\_\_Parabacteroides', u's\_\_distasonis']  
 >bacillales', u'f\_\_Streptococcaceae', u'g\_\_Streptococcus', u's\_\_']  
 >bacillales', u'f\_\_Streptococcaceae', u'g\_\_Streptococcus', u's\_\_']  
 :lostridiales', u'f\_\_Lachnospiraceae', u'g\_\_Coprococcus', u's\_\_']  
 >bacillales', u'f\_\_Streptococcaceae', u'g\_\_Streptococcus', u's\_\_']  
 >bacillales', u'f\_\_Aerococcaceae', u'g\_\_Alloiococcus', u's\_\_']  
 >bacillales', u'f\_\_Streptococcaceae', u'g\_\_Lactococcus', u's\_\_']  
 >bacillales', u'f\_\_Streptococcaceae', u'g\_\_Streptococcus', u's\_\_']  
 >bacillales', u'f\_\_Streptococcaceae', u'g\_\_Streptococcus', u's\_\_']  
 >bacteria', u'o\_\_Enterobacteriales', u'f\_\_Enterobacteriaceae', u'g\_\_', u's\_\_']  
 >bacillales', u'f\_\_Streptococcaceae', u'g\_\_Streptococcus', u's\_\_']  
 >bacillales', u'f\_\_Streptococcaceae', u'g\_\_Streptococcus', u's\_\_']  
 >bacteria', u'o\_\_Enterobacteriales', u'f\_\_Enterobacteriaceae', u'g\_\_', u's\_\_']  
 i', u'o\_\_Actinomycetales', u'f\_\_Corynebacteriaceae', u'g\_\_Corynebacterium', u's\_\_']  
 i', u'o\_\_Actinomycetales', u'f\_\_', u'g\_\_', u's\_\_']

>bacillales', u'f\_\_Streptococcaceae', u'g\_\_Streptococcus', u's\_\_']  
 'o\_\_Bacteroidales', u'f\_\_Bacteroidaceae', u'g\_\_Bacteroides', u's\_\_']  
 'i', u'o\_\_Bifidobacteriales', u'f\_\_Bifidobacteriaceae', u'g\_\_Bifidobacterium', u's\_\_']  
 >bacteria', u'o\_\_Enterobacteriales', u'f\_\_Enterobacteriaceae', u'g\_\_Enterobacter']  
 >bacillales', u'f\_\_Streptococcaceae', u'g\_\_Streptococcus', u's\_\_']  
 >bacillales', u'f\_\_Aerococcaceae', u'g\_\_Alloiococcus', u's\_\_']  
 'i', u'o\_\_Bifidobacteriales', u'f\_\_Bifidobacteriaceae', u'g\_\_Bifidobacterium', u's\_\_adolescentis']  
 :lostridiales', u'f\_\_Lachnospiraceae', u'g\_\_', u's\_\_']  
 's\_\_']  
 :lostridiales', u'f\_\_Veillonellaceae', u'g\_\_Megasphaera', u's\_\_']  
 >bacillales', u'f\_\_Streptococcaceae', u'g\_\_Streptococcus', u's\_\_']  
 >bacteria', u'o\_\_Pseudomonadales', u'f\_\_Moraxellaceae', u'g\_\_Moraxella', u's\_\_']  
 >bacillales', u'f\_\_Streptococcaceae', u'g\_\_Streptococcus', u's\_\_']  
 >bacillales', u'f\_\_Aerococcaceae', u'g\_\_Alloiococcus', u's\_\_']  
 :lostridiales', u'f\_\_Lachnospiraceae', u'g\_\_Dorea', u's\_\_']  
 :lostridiales', u'f\_\_Clostridiaceae', u'g\_\_', u's\_\_']  
 >bacillales', u'f\_\_Streptococcaceae', u'g\_\_Streptococcus', u's\_\_']  
 >bacillales', u'f\_\_Streptococcaceae', u'g\_\_Streptococcus', u's\_\_']  
 :lostridiales', u'f\_\_Veillonellaceae', u'g\_\_Megasphaera', u's\_\_']  
 'o\_\_Bacteroidales', u'f\_\_[Paraprevotellaceae]', u'g\_\_[Prevotella]', u's\_\_']  
 'o\_\_Bacteroidales', u'f\_\_Porphyromonadaceae', u'g\_\_Parabacteroides', u's\_\_distasonis']  
 >bacillales', u'f\_\_Lactobacillaceae', u'g\_\_Lactobacillus', u's\_\_zeae']  
 >bacteria', u'o\_\_Enterobacteriales', u'f\_\_Enterobacteriaceae', u'g\_\_', u's\_\_']  
 'o\_\_Bacteroidales', u'f\_\_Bacteroidaceae', u'g\_\_Bacteroides', u's\_\_']  
 :lostridiales', u'f\_\_Veillonellaceae', u'g\_\_Veillonella', u's\_\_dispar']  
 :lostridiales', u'f\_\_Lachnospiraceae', u'g\_\_', u's\_\_']  
 >bacillales', u'f\_\_Lactobacillaceae', u'g\_\_Lactobacillus', u's\_\_zeae']  
 :lostridiales', u'f\_\_Lachnospiraceae', u'g\_\_Blautia', u's\_\_']  
 >bacillales', u'f\_\_Streptococcaceae', u'g\_\_Streptococcus', u's\_\_']  
 :lostridiales', u'f\_\_Lachnospiraceae', u'g\_\_', u's\_\_']  
 >bacillales', u'f\_\_Streptococcaceae', u'g\_\_Streptococcus', u's\_\_']  
 >bacteria', u'o\_\_Enterobacteriales', u'f\_\_Enterobacteriaceae', u'g\_\_', u's\_\_']  
 'o\_\_Bacteroidales', u'f\_\_Bacteroidaceae', u'g\_\_Bacteroides', u's\_\_']  
 :lostridiales', u'f\_\_Lachnospiraceae', u'g\_\_', u's\_\_']  
 'i', u'o\_\_Actinomycetales', u'f\_\_Corynebacteriaceae', u'g\_\_Corynebacterium', u's\_\_']  
 lales', u'f\_\_Planococcaceae', u'g\_\_', u's\_\_']  
 >bacillales', u'f\_\_Streptococcaceae', u'g\_\_Streptococcus', u's\_\_']  
 :lostridiales', u'f\_\_Veillonellaceae', u'g\_\_Veillonella', u's\_\_dispar']  
 'i', u'o\_\_Bifidobacteriales', u'f\_\_Bifidobacteriaceae', u'g\_\_Bifidobacterium', u's\_\_']  
 'i', u'o\_\_Bifidobacteriales', u'f\_\_Bifidobacteriaceae', u'g\_\_Bifidobacterium', u's\_\_']  
 :lostridiales', u'f\_\_Lachnospiraceae', u'g\_\_', u's\_\_']  
 cteria', u'o\_\_Burkholderiales']  
 >bacillales', u'f\_\_Aerococcaceae', u'g\_\_Alloiococcus', u's\_\_']  
 'i', u'o\_\_Actinomycetales', u'f\_\_Corynebacteriaceae', u'g\_\_Corynebacterium', u's\_\_']  
 acteria', u'o\_\_Rhodospirillales', u'f\_\_Acetobacteraceae', u'g\_\_', u's\_\_']  
 >bacillales', u'f\_\_Streptococcaceae', u'g\_\_Streptococcus', u's\_\_']  
 >bacillales', u'f\_\_Streptococcaceae', u'g\_\_Streptococcus', u's\_\_']  
 >bacillales', u'f\_\_Streptococcaceae', u'g\_\_Streptococcus', u's\_\_']  
 :lostridiales', u'f\_\_Lachnospiraceae', u'g\_\_', u's\_\_']  
 :lostridiales', u'f\_\_Lachnospiraceae', u'g\_\_Blautia']  
 :lostridiales', u'f\_\_Veillonellaceae', u'g\_\_Veillonella', u's\_\_']  
 'i', u'o\_\_Actinomycetales', u'f\_\_Corynebacteriaceae', u'g\_\_Corynebacterium', u's\_\_']  
 'i', u'o\_\_Actinomycetales', u'f\_\_Corynebacteriaceae', u'g\_\_Corynebacterium', u's\_\_']  
 :lostridiales', u'f\_\_[Tissierellaceae]', u'g\_\_Peptoniphilus', u's\_\_']  
 'i', u'o\_\_Actinomycetales', u'f\_\_Corynebacteriaceae', u'g\_\_Corynebacterium', u's\_\_']  
 'i', u'o\_\_Bifidobacteriales', u'f\_\_Bifidobacteriaceae', u'g\_\_Bifidobacterium', u's\_\_adolescentis']

>bacteria', u'o\_\_Enterobacteriales', u'f\_\_Enterobacteriaceae', u'g\_\_', u's\_\_']  
 :lostridiales', u'f\_\_Lachnospiraceae', u'g\_\_[Ruminococcus]', u's\_\_gnavus']  
 'o\_\_Bacteroidales', u'f\_\_Porphyromonadaceae', u'g\_\_Parabacteroides', u's\_\_']  
 >bacteria', u'o\_\_Enterobacteriales', u'f\_\_Enterobacteriaceae', u'g\_\_', u's\_\_']  
 >bacillales', u'f\_\_Aerococcaceae', u'g\_\_Alloiococcus', u's\_\_']  
 'l', u'o\_\_Actinomycetales', u'f\_\_Corynebacteriaceae', u'g\_\_Corynebacterium', u's\_\_']  
 :lostridiales', u'f\_\_Eubacteriaceae', u'g\_\_Pseudoramibacter\_Eubacterium', u's\_\_']  
 >bacillales', u'f\_\_Streptococcaceae', u'g\_\_Streptococcus', u's\_\_']  
 'o\_\_Bacteroidales', u'f\_\_Porphyromonadaceae', u'g\_\_Parabacteroides', u's\_\_distasonis']  
 cteria', u'o\_\_Burkholderiales', u'f\_\_Alcaligenaceae', u'g\_\_Sutterella', u's\_\_']  
 :lostridiales', u'f\_\_Clostridiaceae', u'g\_\_', u's\_\_']  
 >bacillales', u'f\_\_Streptococcaceae', u'g\_\_Streptococcus', u's\_\_']  
 'o\_\_Bacteroidales', u'f\_\_Bacteroidaceae', u'g\_\_Bacteroides', u's\_\_']  
 >bacillales', u'f\_\_Enterococcaceae', u'g\_\_Enterococcus', u's\_\_']  
 :lostridiales', u'f\_\_Lachnospiraceae', u'g\_\_[Ruminococcus]', u's\_\_gnavus']  
 :lostridiales', u'f\_\_Lachnospiraceae', u'g\_\_', u's\_\_']  
 :lostridiales', u'f\_\_Clostridiaceae', u'g\_\_', u's\_\_']  
 >bacteria', u'o\_\_Pseudomonadales', u'f\_\_Pseudomonadaceae', u'g\_\_Pseudomonas', u's\_\_']  
 >bacillales', u'f\_\_Streptococcaceae', u'g\_\_Streptococcus', u's\_\_']  
 'l', u'o\_\_Actinomycetales', u'f\_\_Corynebacteriaceae', u'g\_\_Corynebacterium', u's\_\_']  
 'l', u'o\_\_Bifidobacteriales', u'f\_\_Bifidobacteriaceae', u'g\_\_Bifidobacterium', u's\_\_adolescentis']  
 :lostridiales', u'f\_\_Lachnospiraceae', u'g\_\_Blautia', u's\_\_']  
 >bacteria', u'o\_\_Pasteurellales', u'f\_\_Pasteurellaceae', u'g\_\_Haemophilus', u's\_\_']  
 :lostridiales', u'f\_\_Clostridiaceae', u'g\_\_Clostridium', u's\_\_neonatale']  
 'l', u'o\_\_Actinomycetales', u'f\_\_Corynebacteriaceae', u'g\_\_Corynebacterium', u's\_\_']  
 :lostridiales', u'f\_\_Veillonellaceae', u'g\_\_Veillonella', u's\_\_dispar']  
 >bacteria', u'o\_\_Enterobacteriales', u'f\_\_Enterobacteriaceae', u'g\_\_', u's\_\_']  
 'l', u'o\_\_Actinomycetales', u'f\_\_Micrococcaceae', u'g\_\_Rothia', u's\_\_mucilaginososa']  
 >bacillales', u'f\_\_Streptococcaceae', u'g\_\_Streptococcus', u's\_\_']  
 >bacteria', u'o\_\_Enterobacteriales', u'f\_\_Enterobacteriaceae', u'g\_\_', u's\_\_']  
 >bacillales', u'f\_\_Aerococcaceae', u'g\_\_Alloiococcus', u's\_\_']  
 >bacillales', u'f\_\_Streptococcaceae', u'g\_\_Streptococcus', u's\_\_']  
 >bacillales', u'f\_\_Streptococcaceae', u'g\_\_Streptococcus', u's\_\_']  
 :lostridiales', u'f\_\_[Tissierellaceae]', u'g\_\_Finegoldia', u's\_\_']  
 :lostridiales', u'f\_\_Veillonellaceae', u'g\_\_Veillonella', u's\_\_parvula']  
 'l', u'o\_\_Actinomycetales', u'f\_\_Corynebacteriaceae', u'g\_\_Corynebacterium', u's\_\_']  
 >bacillales', u'f\_\_Streptococcaceae', u'g\_\_Streptococcus', u's\_\_']  
 'o\_\_Bacteroidales', u'f\_\_Bacteroidaceae', u'g\_\_Bacteroides', u's\_\_ovatus']  
 'l', u'o\_\_Actinomycetales', u'f\_\_Corynebacteriaceae', u'g\_\_Corynebacterium', u's\_\_']  
 >bacillales', u'f\_\_Streptococcaceae', u'g\_\_Streptococcus', u's\_\_']  
 >bacillales', u'f\_\_Streptococcaceae', u'g\_\_Streptococcus', u's\_\_']  
 >bacillales', u'f\_\_Enterococcaceae', u'g\_\_Enterococcus', u's\_\_']  
 'o\_\_Bacteroidales', u'f\_\_Bacteroidaceae', u'g\_\_Bacteroides', u's\_\_fragilis']  
 'o\_\_Bacteroidales', u'f\_\_Bacteroidaceae', u'g\_\_Bacteroides', u's\_\_']  
 'l', u'o\_\_Bifidobacteriales', u'f\_\_Bifidobacteriaceae', u'g\_\_Bifidobacterium']  
 'o\_\_Bacteroidales', u'f\_\_Porphyromonadaceae', u'g\_\_Parabacteroides', u's\_\_distasonis']  
 :lostridiales', u'f\_\_Lachnospiraceae']  
 >bacillales', u'f\_\_Streptococcaceae', u'g\_\_Streptococcus', u's\_\_']  
 >bacteria', u'o\_\_Enterobacteriales', u'f\_\_Enterobacteriaceae', u'g\_\_', u's\_\_']  
 'l', u'o\_\_Actinomycetales', u'f\_\_Nocardoidaceae', u'g\_\_', u's\_\_']  
 :lostridiales', u'f\_\_Lachnospiraceae', u'g\_\_', u's\_\_']  
 >bacillales', u'f\_\_Streptococcaceae', u'g\_\_Streptococcus', u's\_\_']  
 'l', u'o\_\_Coriobacteriales', u'f\_\_Coriobacteriaceae', u'g\_\_Eggerthella', u's\_\_lenta']  
 >bacillales', u'f\_\_Streptococcaceae', u'g\_\_Streptococcus', u's\_\_']  
 >bacillales', u'f\_\_Streptococcaceae', u'g\_\_Streptococcus']  
 >bacillales', u'f\_\_Streptococcaceae', u'g\_\_Streptococcus', u's\_\_']

'o\_\_Bacteroidales', u'f\_\_Bacteroidaceae', u'g\_\_Bacteroides', u's\_\_']  
 >bacteria', u'o\_\_Enterobacteriales', u'f\_\_Enterobacteriaceae', u'g\_\_', u's\_\_']  
 >bacillales', u'f\_\_Streptococcaceae', u'g\_\_Streptococcus', u's\_\_']  
 >bacteria', u'o\_\_Pasteurellales', u'f\_\_Pasteurellaceae', u'g\_\_Haemophilus', u's\_\_']  
 :lostridiales', u'f\_\_Lachnospiraceae']  
 cteria', u'o\_\_Burkholderiales', u'f\_\_Comamonadaceae', u'g\_\_', u's\_\_']  
 'o\_\_Bacteroidales', u'f\_\_Bacteroidaceae', u'g\_\_Bacteroides', u's\_\_fragilis']  
 cteria', u'o\_\_Neisseriales', u'f\_\_Neisseriaceae', u'g\_\_', u's\_\_']  
 t', u'o\_\_Actinomycetales', u'f\_\_Corynebacteriaceae', u'g\_\_Corynebacterium', u's\_\_']  
 :lostridiales', u'f\_\_Veillonellaceae', u'g\_\_Veillonella']  
 t', u'o\_\_Bifidobacteriales', u'f\_\_Bifidobacteriaceae', u'g\_\_Bifidobacterium', u's\_\_']  
 >bacillales', u'f\_\_Streptococcaceae', u'g\_\_Streptococcus', u's\_\_']  
 t', u'o\_\_Rubrobacterales', u'f\_\_Rubrobacteraceae', u'g\_\_Rubrobacter', u's\_\_']  
 'o\_\_Bacteroidales', u'f\_\_Bacteroidaceae', u'g\_\_Bacteroides', u's\_\_']  
 :lostridiales', u'f\_\_Veillonellaceae', u'g\_\_Veillonella', u's\_\_']  
 acteria', u'o\_\_Rhodospirillales', u'f\_\_Rhodospirillaceae', u'g\_\_', u's\_\_']  
 t', u'o\_\_Actinomycetales', u'f\_\_Corynebacteriaceae', u'g\_\_Corynebacterium', u's\_\_']  
 t', u'o\_\_Actinomycetales', u'f\_\_Corynebacteriaceae', u'g\_\_Corynebacterium', u's\_\_']  
 >bacillales', u'f\_\_Streptococcaceae', u'g\_\_Streptococcus', u's\_\_']  
 >bacillales', u'f\_\_Streptococcaceae', u'g\_\_Streptococcus', u's\_\_']  
 >bacteria', u'o\_\_Enterobacteriales', u'f\_\_Enterobacteriaceae', u'g\_\_', u's\_\_']  
 >bacillales', u'f\_\_Streptococcaceae', u'g\_\_Streptococcus', u's\_\_']  
 >bacteria', u'o\_\_Enterobacteriales', u'f\_\_Enterobacteriaceae', u'g\_\_', u's\_\_']  
 t', u'o\_\_Actinomycetales', u'f\_\_Corynebacteriaceae', u'g\_\_Corynebacterium', u's\_\_']  
 :lostridiales', u'f\_\_Lachnospiraceae', u'g\_\_[Ruminococcus]', u's\_\_gnavus']  
 cteria', u'o\_\_Burkholderiales', u'f\_\_Comamonadaceae', u'g\_\_', u's\_\_']  
 'o\_\_Bacteroidales', u'f\_\_Bacteroidaceae', u'g\_\_Bacteroides', u's\_\_fragilis']  
 >bacillales', u'f\_\_Streptococcaceae', u'g\_\_Streptococcus', u's\_\_']  
 >bacteria', u'o\_\_Pseudomonadales', u'f\_\_Moraxellaceae', u'g\_\_Moraxella', u's\_\_']  
 >bacillales', u'f\_\_Enterococcaceae', u'g\_\_Enterococcus', u's\_\_']  
 'o\_\_Bacteroidales', u'f\_\_Bacteroidaceae', u'g\_\_Bacteroides', u's\_\_uniformis']  
 lales', u'f\_\_Staphylococcaceae', u'g\_\_Staphylococcus']  
 :lostridiales', u'f\_\_Lachnospiraceae', u'g\_\_[Ruminococcus]', u's\_\_gnavus']  
 'o\_\_Bacteroidales', u'f\_\_Prevotellaceae', u'g\_\_Prevotella', u's\_\_']  
 t', u'o\_\_Actinomycetales', u'f\_\_Corynebacteriaceae', u'g\_\_Corynebacterium', u's\_\_']  
 'o\_\_Bacteroidales', u'f\_\_Bacteroidaceae', u'g\_\_Bacteroides', u's\_\_']  
 >bacillales', u'f\_\_Streptococcaceae', u'g\_\_Streptococcus', u's\_\_']  
 >bacteria', u'o\_\_Enterobacteriales', u'f\_\_Enterobacteriaceae', u'g\_\_Providencia', u's\_\_']  
 'o\_\_Bacteroidales', u'f\_\_Prevotellaceae', u'g\_\_Prevotella', u's\_\_']  
 t', u'o\_\_Actinomycetales', u'f\_\_Corynebacteriaceae', u'g\_\_Corynebacterium', u's\_\_']  
 lales', u'f\_\_Planococcaceae', u'g\_\_', u's\_\_']  
 >bacillales', u'f\_\_Streptococcaceae', u'g\_\_Streptococcus', u's\_\_']  
 >bacillales', u'f\_\_Streptococcaceae', u'g\_\_Streptococcus', u's\_\_']  
 :lostridiales', u'f\_\_Lachnospiraceae', u'g\_\_', u's\_\_']  
 t', u'o\_\_Actinomycetales', u'f\_\_Corynebacteriaceae', u'g\_\_Corynebacterium', u's\_\_']  
 >bacteria', u'o\_\_Pseudomonadales', u'f\_\_Moraxellaceae', u'g\_\_', u's\_\_']  
 'o\_\_Bacteroidales', u'f\_\_Bacteroidaceae', u'g\_\_Bacteroides', u's\_\_']  
 :lostridiales', u'f\_\_Veillonellaceae', u'g\_\_Veillonella', u's\_\_']  
 >bacillales', u'f\_\_Streptococcaceae', u'g\_\_Streptococcus', u's\_\_']  
 'o\_\_Bacteroidales', u'f\_\_Bacteroidaceae', u'g\_\_Bacteroides', u's\_\_caccae']  
 :lostridiales', u'f\_\_Veillonellaceae', u'g\_\_Veillonella', u's\_\_']  
 acteria', u'o\_\_Rhizobiales', u'f\_\_Phyllobacteriaceae', u'g\_\_Phyllobacterium', u's\_\_']  
 >bacteria', u'o\_\_Enterobacteriales', u'f\_\_Enterobacteriaceae', u'g\_\_', u's\_\_']  
 :lostridiales', u'f\_\_Ruminococcaceae', u'g\_\_Oscillospira', u's\_\_']  
 :lostridiales', u'f\_\_Ruminococcaceae', u'g\_\_Oscillospira', u's\_\_']  
 :lostridiales', u'f\_\_Clostridiaceae', u'g\_\_', u's\_\_']

>bacillales', u'f\_\_Streptococcaceae', u'g\_\_Streptococcus', u's\_\_']  
 :lostridiales', u'f\_\_Lachnospiraceae', u'g\_\_[Ruminococcus]', u's\_\_gnavus']  
 >bacillales', u'f\_\_Aerococcaceae', u'g\_\_Alloiococcus', u's\_\_']  
 >bacillales', u'f\_\_Enterococcaceae', u'g\_\_Enterococcus', u's\_\_']  
 >bacteria', u'o\_\_Xanthomonadales', u'f\_\_Xanthomonadaceae', u'g\_\_', u's\_\_']  
 >bacillales', u'f\_\_Aerococcaceae', u'g\_\_Alloiococcus', u's\_\_']  
 :lostridiales', u'f\_\_Clostridiaceae', u'g\_\_Clostridium']  
 >bacillales', u'f\_\_Streptococcaceae', u'g\_\_Streptococcus', u's\_\_']  
 :lostridiales', u'f\_\_Lachnospiraceae', u'g\_\_', u's\_\_']  
 >bacillales', u'f\_\_Streptococcaceae', u'g\_\_Streptococcus', u's\_\_']  
 :lostridiales', u'f\_\_[Tissierellaceae]', u'g\_\_Finegoldia', u's\_\_']  
 :lostridiales', u'f\_\_[Tissierellaceae]', u'g\_\_Peptoniphilus', u's\_\_']  
 >bacteria', u'o\_\_Enterobacteriales', u'f\_\_Enterobacteriaceae', u'g\_\_Proteus', u's\_\_']  
 'o\_\_Bacteroidales', u'f\_\_Prevotellaceae', u'g\_\_Prevotella', u's\_\_']  
 >bacillales', u'f\_\_Enterococcaceae', u'g\_\_Enterococcus', u's\_\_']  
 lales', u'f\_\_Staphylococcaceae', u'g\_\_Staphylococcus', u's\_\_']  
 >bacillales', u'f\_\_Streptococcaceae', u'g\_\_Streptococcus', u's\_\_']  
 i', u'o\_\_Actinomycetales', u'f\_\_Corynebacteriaceae', u'g\_\_Corynebacterium', u's\_\_']  
 :lostridiales', u'f\_\_Clostridiaceae', u'g\_\_Clostridium', u's\_\_neonatale']  
 >bacillales', u'f\_\_Aerococcaceae', u'g\_\_Alloiococcus', u's\_\_']  
 :lostridiales', u'f\_\_Lachnospiraceae', u'g\_\_', u's\_\_']  
 >bacillales', u'f\_\_Streptococcaceae', u'g\_\_Streptococcus', u's\_\_']  
 >bacillales', u'f\_\_Streptococcaceae', u'g\_\_Streptococcus', u's\_\_']  
 :lostridiales', u'f\_\_Veillonellaceae', u'g\_\_Veillonella', u's\_\_dispar']  
 i', u'o\_\_Actinomycetales', u'f\_\_Nocardiodaceae', u'g\_\_', u's\_\_']  
 'o\_\_Bacteroidales', u'f\_\_Bacteroidaceae', u'g\_\_Bacteroides', u's\_\_']  
 :lostridiales', u'f\_\_Lachnospiraceae']  
  
 >bacteria', u'o\_\_Pasteurellales', u'f\_\_Pasteurellaceae', u'g\_\_Haemophilus', u's\_\_']  
 >bacillales', u'f\_\_Streptococcaceae', u'g\_\_Streptococcus', u's\_\_']  
 'o\_\_Bacteroidales', u'f\_\_Bacteroidaceae', u'g\_\_Bacteroides', u's\_\_ovatus']  
 :lostridiales', u'f\_\_Lachnospiraceae', u'g\_\_[Ruminococcus]', u's\_\_gnavus']  
 >bacteria', u'o\_\_Enterobacteriales', u'f\_\_Enterobacteriaceae', u'g\_\_', u's\_\_']  
 >bacillales', u'f\_\_Streptococcaceae', u'g\_\_Streptococcus', u's\_\_']  
 >bacillales', u'f\_\_Streptococcaceae', u'g\_\_Streptococcus', u's\_\_']  
 >bacillales', u'f\_\_Streptococcaceae', u'g\_\_Streptococcus', u's\_\_']  
 cteria', u'o\_\_Neisseriales', u'f\_\_Neisseriaceae', u'g\_\_', u's\_\_']  
 >bacillales', u'f\_\_Streptococcaceae', u'g\_\_Streptococcus', u's\_\_']  
 i', u'o\_\_Bifidobacteriales', u'f\_\_Bifidobacteriaceae', u'g\_\_Bifidobacterium', u's\_\_adolescentis']  
 >bacillales', u'f\_\_Streptococcaceae', u'g\_\_Streptococcus', u's\_\_infantis']  
 i', u'o\_\_Actinomycetales', u'f\_\_Corynebacteriaceae', u'g\_\_Corynebacterium', u's\_\_']  
 >bacillales', u'f\_\_Streptococcaceae', u'g\_\_Streptococcus', u's\_\_infantis']  
 i', u'o\_\_Actinomycetales', u'f\_\_Corynebacteriaceae', u'g\_\_Corynebacterium', u's\_\_']  
  
 >bacillales', u'f\_\_Streptococcaceae', u'g\_\_Streptococcus', u's\_\_']  
 >bacillales', u'f\_\_Streptococcaceae', u'g\_\_Streptococcus', u's\_\_']  
 acteria', u'o\_\_Rhizobiales', u'f\_\_Phyllobacteriaceae', u'g\_\_Phyllobacterium', u's\_\_']  
 'o\_\_Bacteroidales', u'f\_\_Bacteroidaceae', u'g\_\_Bacteroides', u's\_\_']  
 'o\_\_Bacteroidales', u'f\_\_Bacteroidaceae', u'g\_\_Bacteroides', u's\_\_caccae']  
 >bacillales', u'f\_\_Aerococcaceae', u'g\_\_Alloiococcus', u's\_\_']  
 >bacillales', u'f\_\_Aerococcaceae', u'g\_\_Alloiococcus', u's\_\_']  
 i', u'o\_\_Actinomycetales', u'f\_\_Corynebacteriaceae', u'g\_\_Corynebacterium', u's\_\_']  
 i', u'o\_\_Actinomycetales', u'f\_\_Corynebacteriaceae', u'g\_\_Corynebacterium', u's\_\_']  
 >bacillales', u'f\_\_Streptococcaceae', u'g\_\_Streptococcus', u's\_\_']  
 'o\_\_Bacteroidales', u'f\_\_Bacteroidaceae', u'g\_\_Bacteroides', u's\_\_']  
 >bacillales', u'f\_\_Streptococcaceae', u'g\_\_Streptococcus', u's\_\_']

>bacillales', u'f\_\_Streptococcaceae', u'g\_\_Streptococcus', u's\_\_']  
 i', u'o\_\_Actinomycetales', u'f\_\_Corynebacteriaceae', u'g\_\_Corynebacterium', u's\_\_']  
 >bacteria', u'o\_\_Pasteurellales', u'f\_\_Pasteurellaceae', u'g\_\_Haemophilus', u's\_\_']  
 >bacteria', u'o\_\_Pseudomonadales', u'f\_\_Moraxellaceae', u'g\_\_Moraxella', u's\_\_']  
 :lostridiales', u'f\_\_Veillonellaceae', u'g\_\_Dialister', u's\_\_']  
 i', u'o\_\_Actinomycetales', u'f\_\_Micrococcaceae', u'g\_\_Microbispora', u's\_\_rosea']  
 >bacteria', u'o\_\_Enterobacteriales', u'f\_\_Enterobacteriaceae', u'g\_\_', u's\_\_']  
 :lostridiales', u'f\_\_[Tissierellaceae]', u'g\_\_Finegoldia', u's\_\_']  
 lales', u'f\_\_Staphylococcaceae', u'g\_\_Staphylococcus', u's\_\_']  
 i', u'o\_\_Actinomycetales', u'f\_\_Corynebacteriaceae', u'g\_\_Corynebacterium', u's\_\_']  
 :lostridiales', u'f\_\_Lachnospiraceae', u'g\_\_[Ruminococcus]', u's\_\_']  
 acteria', u'o\_\_Rhizobiales', u'f\_\_Phyllobacteriaceae', u'g\_\_Phyllobacterium', u's\_\_']  
 i', u'o\_\_Actinomycetales', u'f\_\_Corynebacteriaceae', u'g\_\_Corynebacterium', u's\_\_']  
 i', u'o\_\_Actinomycetales', u'f\_\_Corynebacteriaceae', u'g\_\_Corynebacterium', u's\_\_']  
 acteria', u'o\_\_Rhodobacterales', u'f\_\_Rhodobacteraceae', u'g\_\_Paracoccus', u's\_\_']  
 i', u'o\_\_Actinomycetales', u'f\_\_Corynebacteriaceae', u'g\_\_Corynebacterium', u's\_\_']  
 >bacillales', u'f\_\_Aerococcaceae', u'g\_\_Alloiococcus', u's\_\_']  
 i', u'o\_\_Bifidobacteriales', u'f\_\_Bifidobacteriaceae', u'g\_\_Bifidobacterium']  
 i', u'o\_\_Actinomycetales', u'f\_\_Corynebacteriaceae', u'g\_\_Corynebacterium', u's\_\_']  
 >bacteria', u'o\_\_Pasteurellales', u'f\_\_Pasteurellaceae', u'g\_\_Haemophilus', u's\_\_']  
 >\_\_Erysipelotrichales', u'f\_\_Erysipelotrichaceae', u'g\_\_[Eubacterium]', u's\_\_dolichum']  
 i', u'o\_\_Actinomycetales', u'f\_\_Micrococcaceae', u'g\_\_Rothia', u's\_\_mucilaginoso']  
 acteria', u'o\_\_Caulobacteriales', u'f\_\_Caulobacteraceae', u'g\_\_', u's\_\_']  
 i', u'o\_\_Actinomycetales', u'f\_\_Corynebacteriaceae', u'g\_\_Corynebacterium', u's\_\_']  
 'o\_\_Bacteroidales', u'f\_\_Bacteroidaceae', u'g\_\_Bacteroides', u's\_\_fragilis']  
 'o\_\_Bacteroidales', u'f\_\_Porphyromonadaceae', u'g\_\_Parabacteroides', u's\_\_distasonis']  
 >bacteria', u'o\_\_Pseudomonadales', u'f\_\_Moraxellaceae', u'g\_\_Moraxella', u's\_\_']  
 i', u'o\_\_Actinomycetales', u'f\_\_Corynebacteriaceae', u'g\_\_Corynebacterium', u's\_\_']  
 >bacteria', u'o\_\_Enterobacteriales', u'f\_\_Enterobacteriaceae', u'g\_\_', u's\_\_']  
 >bacillales', u'f\_\_Streptococcaceae', u'g\_\_Streptococcus', u's\_\_']  
 >bacteria', u'o\_\_Enterobacteriales', u'f\_\_Enterobacteriaceae', u'g\_\_', u's\_\_']  
 acteria', u'o\_\_Burkholderiales', u'f\_\_Oxalobacteraceae', u'g\_\_', u's\_\_']  
 acteria', u'o\_\_Burkholderiales', u'f\_\_Oxalobacteraceae', u'g\_\_', u's\_\_']  
 :lostridiales', u'f\_\_Lachnospiraceae', u'g\_\_', u's\_\_']  
 acteria', u'o\_\_Burkholderiales', u'f\_\_Comamonadaceae', u'g\_\_', u's\_\_']  
 >bacillales', u'f\_\_Enterococcaceae', u'g\_\_Enterococcus', u's\_\_']  
 >bacillales', u'f\_\_Streptococcaceae', u'g\_\_Streptococcus', u's\_\_']  
 >bacillales', u'f\_\_Streptococcaceae', u'g\_\_Streptococcus', u's\_\_']  
 >bacillales', u'f\_\_Streptococcaceae', u'g\_\_Streptococcus', u's\_\_']  
 i', u'o\_\_Actinomycetales', u'f\_\_Corynebacteriaceae', u'g\_\_Corynebacterium', u's\_\_']  
 :lostridiales', u'f\_\_Veillonellaceae', u'g\_\_Veillonella', u's\_\_parvula']  
 >bacillales', u'f\_\_Streptococcaceae', u'g\_\_Streptococcus', u's\_\_']  
 >bacteria', u'o\_\_Pasteurellales', u'f\_\_Pasteurellaceae', u'g\_\_Haemophilus', u's\_\_']  
 >bacillales', u'f\_\_Streptococcaceae', u'g\_\_Streptococcus', u's\_\_']  
 >bacillales', u'f\_\_Aerococcaceae', u'g\_\_Alloiococcus', u's\_\_']  
 i', u'o\_\_Bifidobacteriales', u'f\_\_Bifidobacteriaceae', u'g\_\_Bifidobacterium', u's\_\_adolescentis']  
 >bacillales', u'f\_\_Streptococcaceae', u'g\_\_Streptococcus', u's\_\_']  
 :lostridiales', u'f\_\_Lachnospiraceae', u'g\_\_Dorea', u's\_\_']  
 i', u'o\_\_Bifidobacteriales', u'f\_\_Bifidobacteriaceae', u'g\_\_Bifidobacterium']  
 :lostridiales', u'f\_\_Lachnospiraceae', u'g\_\_', u's\_\_']  
 >bacillales', u'f\_\_Lactobacillaceae', u'g\_\_Lactobacillus', u's\_\_']  
 >bacillales', u'f\_\_Aerococcaceae', u'g\_\_Alloiococcus', u's\_\_']  
 >bacillales', u'f\_\_Streptococcaceae', u'g\_\_Streptococcus', u's\_\_']  
 :lostridiales', u'f\_\_Lachnospiraceae', u'g\_\_Dorea', u's\_\_']  
 'o\_\_Bacteroidales', u'f\_\_Bacteroidaceae', u'g\_\_Bacteroides', u's\_\_']  
 >bacteria', u'o\_\_Enterobacteriales', u'f\_\_Enterobacteriaceae', u'g\_\_', u's\_\_']



lales', u'f\_\_Staphylococcaceae', u'g\_\_Staphylococcus', u's\_\_epidermidis']  
 :lostridiales', u'f\_\_Lachnospiraceae', u'g\_\_', u's\_\_']  
 i', u'o\_\_Actinomycetales', u'f\_\_Corynebacteriaceae', u'g\_\_Corynebacterium', u's\_\_']  
 >bacillales', u'f\_\_Streptococcaceae', u'g\_\_Streptococcus', u's\_\_']  
 :lostridiales', u'f\_\_Veillonellaceae', u'g\_\_Veillonella', u's\_\_']  
 >bacteria', u'o\_\_Pasteurellales', u'f\_\_Pasteurellaceae', u'g\_\_Haemophilus', u's\_\_']  
 i', u'o\_\_Bifidobacteriales', u'f\_\_Bifidobacteriaceae', u'g\_\_Bifidobacterium', u's\_\_']  
 >bacillales', u'f\_\_Streptococcaceae', u'g\_\_Streptococcus', u's\_\_']  
 >bacteria', u'o\_\_Enterobacteriales', u'f\_\_Enterobacteriaceae', u'g\_\_', u's\_\_']  
 >bacteria', u'o\_\_Xanthomonadales', u'f\_\_Xanthomonadaceae', u'g\_\_Lysobacter', u's\_\_']  
 'o\_\_Bacteroidales', u'f\_\_Porphyromonadaceae', u'g\_\_Parabacteroides', u's\_\_distasonis']  
 >bacteria', u'o\_\_Enterobacteriales', u'f\_\_Enterobacteriaceae', u'g\_\_', u's\_\_']  
 :lostridiales', u'f\_\_Clostridiaceae', u'g\_\_', u's\_\_']  
 :lostridiales', u'f\_\_Ruminococcaceae', u'g\_\_Ruminococcus', u's\_\_']  
 'o\_\_Bacteroidales', u'f\_\_Bacteroidaceae', u'g\_\_Bacteroides', u's\_\_']  
 i', u'o\_\_Actinomycetales', u'f\_\_Corynebacteriaceae', u'g\_\_Corynebacterium', u's\_\_']  
 'o\_\_Bacteroidales', u'f\_\_Bacteroidaceae', u'g\_\_Bacteroides', u's\_\_fragilis']  
 >bacillales', u'f\_\_Streptococcaceae', u'g\_\_Streptococcus', u's\_\_']  
 cteria', u'o\_\_Burkholderiales', u'f\_\_Alcaligenaceae', u'g\_\_Sutterella', u's\_\_']  
 >bacillales', u'f\_\_Streptococcaceae', u'g\_\_Streptococcus', u's\_\_']  
 :lostridiales', u'f\_\_Clostridiaceae', u'g\_\_', u's\_\_']  
 >bacillales', u'f\_\_Streptococcaceae', u'g\_\_Streptococcus', u's\_\_']  
 >bacillales', u'f\_\_Streptococcaceae', u'g\_\_Streptococcus', u's\_\_']  
 >bacillales', u'f\_\_Aerococcaceae', u'g\_\_Aerococcus', u's\_\_']  
 lales']  
 >bacteria', u'o\_\_Enterobacteriales', u'f\_\_Enterobacteriaceae', u'g\_\_', u's\_\_']  
 >bacteria', u'o\_\_Pseudomonadales', u'f\_\_Moraxellaceae', u'g\_\_Moraxella', u's\_\_']  
 'o\_\_Bacteroidales', u'f\_\_Bacteroidaceae', u'g\_\_Bacteroides', u's\_\_']  
 i', u'o\_\_Bifidobacteriales', u'f\_\_Bifidobacteriaceae', u'g\_\_Bifidobacterium', u's\_\_']  
 >bacteria', u'o\_\_Enterobacteriales', u'f\_\_Enterobacteriaceae', u'g\_\_', u's\_\_']  
 cteria', u'o\_\_Burkholderiales', u'f\_\_Comamonadaceae']  
 :lostridiales', u'f\_\_Veillonellaceae', u'g\_\_Veillonella', u's\_\_dispar']  
 'o\_\_Bacteroidales', u'f\_\_[Paraprevotellaceae]', u'g\_\_[Prevotella]', u's\_\_']  
 >bacillales', u'f\_\_Streptococcaceae', u'g\_\_Streptococcus', u's\_\_']  
 >bacillales', u'f\_\_Streptococcaceae', u'g\_\_Lactococcus', u's\_\_']  
 >bacillales', u'f\_\_Streptococcaceae', u'g\_\_Streptococcus', u's\_\_']  
 >bacillales', u'f\_\_Aerococcaceae', u'g\_\_Alloiococcus', u's\_\_']  
 :lostridiales', u'f\_\_Veillonellaceae', u'g\_\_Megasphaera', u's\_\_']  
 'o\_\_Bacteroidales', u'f\_\_Bacteroidaceae', u'g\_\_Bacteroides', u's\_\_']  
 >bacteria', u'o\_\_Enterobacteriales', u'f\_\_Enterobacteriaceae', u'g\_\_', u's\_\_']  
 'o\_\_Bacteroidales', u'f\_\_Bacteroidaceae', u'g\_\_Bacteroides', u's\_\_caccae']  
 :lostridiales', u'f\_\_Clostridiaceae', u'g\_\_Clostridium']  
 i', u'o\_\_Actinomycetales', u'f\_\_Corynebacteriaceae', u'g\_\_Corynebacterium', u's\_\_']  
 >bacteria', u'o\_\_Enterobacteriales', u'f\_\_Enterobacteriaceae', u'g\_\_', u's\_\_']  
 :lostridiales', u'f\_\_Clostridiaceae', u'g\_\_', u's\_\_']  
 >bacillales', u'f\_\_Enterococcaceae', u'g\_\_Enterococcus', u's\_\_']  
 >bacteria', u'o\_\_Enterobacteriales', u'f\_\_Enterobacteriaceae', u'g\_\_', u's\_\_']  
 >bacillales', u'f\_\_Streptococcaceae', u'g\_\_Streptococcus', u's\_\_']  
 i', u'o\_\_Actinomycetales', u'f\_\_Corynebacteriaceae', u'g\_\_Corynebacterium', u's\_\_']  
 >bacillales', u'f\_\_Enterococcaceae', u'g\_\_Enterococcus', u's\_\_']  
 cteria', u'o\_\_Burkholderiales', u'f\_\_Comamonadaceae', u'g\_\_', u's\_\_']  
 'o\_\_Bacteroidales', u'f\_\_Bacteroidaceae', u'g\_\_Bacteroides', u's\_\_']  
 :lostridiales', u'f\_\_', u'g\_\_', u's\_\_']  
 cteria', u'o\_\_Neisseriales', u'f\_\_Neisseriaceae', u'g\_\_', u's\_\_']  
 >bacillales', u'f\_\_Streptococcaceae', u'g\_\_Streptococcus', u's\_\_']  
 >bacillales', u'f\_\_Streptococcaceae', u'g\_\_Streptococcus', u's\_\_']

:lostridiales', u'f\_\_Veillonellaceae', u'g\_\_Veillonella', u's\_\_']  
 :lostridiales', u'f\_\_Veillonellaceae', u'g\_\_Veillonella', u's\_\_']  
 acteria', u'o\_\_Rhodobacterales', u'f\_\_Rhodobacteraceae', u'g\_\_Paracoccus', u's\_\_aminovorans']  
 :lostridiales', u'f\_\_Lachnospiraceae', u'g\_\_', u's\_\_']  
 >bacillales', u'f\_\_Streptococcaceae', u'g\_\_Streptococcus', u's\_\_']  
 >bacteria', u'o\_\_Enterobacteriales', u'f\_\_Enterobacteriaceae', u'g\_\_', u's\_\_']  
 :lostridiales', u'f\_\_Clostridiaceae', u'g\_\_', u's\_\_']  
 t', u'o\_\_Bifidobacteriales', u'f\_\_Bifidobacteriaceae', u'g\_\_Bifidobacterium', u's\_\_adolescentis']  
 :lostridiales', u'f\_\_Lachnospiraceae']  
 >bacillales', u'f\_\_Streptococcaceae', u'g\_\_Streptococcus', u's\_\_']  
 >bacillales', u'f\_\_Lactobacillaceae', u'g\_\_Lactobacillus', u's\_\_']  
 >bacteria', u'o\_\_Pseudomonadales', u'f\_\_Moraxellaceae', u'g\_\_', u's\_\_']  
 :lostridiales', u'f\_\_Veillonellaceae', u'g\_\_Veillonella', u's\_\_dispar']  
 'o\_\_Bacteroidales', u'f\_\_Porphyromonadaceae', u'g\_\_Parabacteroides', u's\_\_']  
 t', u'o\_\_Actinomycetales', u'f\_\_Corynebacteriaceae', u'g\_\_Corynebacterium', u's\_\_']  
 >bacillales', u'f\_\_Streptococcaceae', u'g\_\_Streptococcus', u's\_\_']  
 'o\_\_Bacteroidales', u'f\_\_Porphyromonadaceae', u'g\_\_Parabacteroides', u's\_\_distasonis']  
 'o\_\_Bacteroidales', u'f\_\_Bacteroidaceae', u'g\_\_Bacteroides', u's\_\_']  
 >bacteria', u'o\_\_Pasteurellales', u'f\_\_Pasteurellaceae', u'g\_\_Haemophilus', u's\_\_parainfluenzae']  
 :lostridiales', u'f\_\_Lachnospiraceae', u'g\_\_[Ruminococcus]', u's\_\_gnavus']  
 >bacillales', u'f\_\_Streptococcaceae', u'g\_\_Streptococcus', u's\_\_']  
 :lostridiales', u'f\_\_Veillonellaceae', u'g\_\_Veillonella', u's\_\_']  
 >bacillales', u'f\_\_Streptococcaceae', u'g\_\_Streptococcus', u's\_\_']  
 'obiae', u'o\_\_Verrucomicrobiales', u'f\_\_Verrucomicrobiaceae', u'g\_\_Akkermansia', u's\_\_muciniphila']  
 >bacillales', u'f\_\_Streptococcaceae', u'g\_\_Streptococcus', u's\_\_']  
 >bacillales', u'f\_\_Streptococcaceae', u'g\_\_Streptococcus', u's\_\_']  
 t', u'o\_\_Actinomycetales', u'f\_\_Actinomycetaceae', u'g\_\_Actinomyces', u's\_\_']  
 :lostridiales', u'f\_\_Lachnospiraceae', u'g\_\_', u's\_\_']  
 :lostridiales', u'f\_\_Veillonellaceae', u'g\_\_Veillonella', u's\_\_']  
 lales', u'f\_\_Staphylococcaceae', u'g\_\_Staphylococcus', u's\_\_']  
 >bacillales', u'f\_\_Aerococcaceae', u'g\_\_Alloiococcus', u's\_\_']  
 >bacillales', u'f\_\_Streptococcaceae', u'g\_\_Streptococcus', u's\_\_']  
 >bacillales', u'f\_\_Carnobacteriaceae']  
 :lostridiales', u'f\_\_Clostridiaceae', u'g\_\_', u's\_\_']  
 'o\_\_Bacteroidales', u'f\_\_Bacteroidaceae', u'g\_\_Bacteroides', u's\_\_']  
 lales']  
 'o\_\_Bacteroidales', u'f\_\_Porphyromonadaceae', u'g\_\_Parabacteroides', u's\_\_distasonis']  
 >bacteria', u'o\_\_Enterobacteriales', u'f\_\_Enterobacteriaceae', u'g\_\_', u's\_\_']  
 >bacteria', u'o\_\_Enterobacteriales', u'f\_\_Enterobacteriaceae', u'g\_\_', u's\_\_']  
 t', u'o\_\_Bifidobacteriales', u'f\_\_Bifidobacteriaceae', u'g\_\_Bifidobacterium']  
 :lostridiales', u'f\_\_Lachnospiraceae', u'g\_\_Blautia', u's\_\_']  
 >bacillales', u'f\_\_Streptococcaceae', u'g\_\_Streptococcus', u's\_\_']  
 ', u'o\_\_Coriobacteriales', u'f\_\_Coriobacteriaceae', u'g\_\_Eggerthella', u's\_\_lenta']  
 >bacillales', u'f\_\_Streptococcaceae', u'g\_\_Streptococcus', u's\_\_']  
 >bacillales', u'f\_\_Streptococcaceae', u'g\_\_Streptococcus', u's\_\_']  
 cteria', u'o\_\_Burkholderiales', u'f\_\_Oxalobacteraceae', u'g\_\_', u's\_\_']  
 >bacillales', u'f\_\_Streptococcaceae', u'g\_\_Streptococcus', u's\_\_']  
 t', u'o\_\_Actinomycetales', u'f\_\_Corynebacteriaceae', u'g\_\_Corynebacterium', u's\_\_']  
 >bacteria', u'o\_\_Pseudomonadales', u'f\_\_Moraxellaceae', u'g\_\_', u's\_\_']  
 >bacteria', u'o\_\_Pasteurellales', u'f\_\_Pasteurellaceae', u'g\_\_Haemophilus', u's\_\_influenzae']  
 >bacillales', u'f\_\_Streptococcaceae', u'g\_\_Streptococcus', u's\_\_']  
 >bacillales', u'f\_\_Streptococcaceae', u'g\_\_Streptococcus', u's\_\_']  
 :lostridiales', u'f\_\_Ruminococcaceae', u'g\_\_Oscillospira', u's\_\_']  
 lales', u'f\_\_Staphylococcaceae', u'g\_\_Staphylococcus', u's\_\_']  
  
 :lostridiales', u'f\_\_Lachnospiraceae', u'g\_\_', u's\_\_']

'o\_\_Bacteroidales', u'f\_\_Porphyromonadaceae', u'g\_\_Parabacteroides', u's\_\_distasonis']  
>bacillales', u'f\_\_Streptococcaceae', u'g\_\_Streptococcus', u's\_\_']  
'o\_\_Bacteroidales', u'f\_\_Bacteroidaceae', u'g\_\_Bacteroides', u's\_\_fragilis']  
cteria', u'o\_\_Burkholderiales', u'f\_\_Oxalobacteraceae', u'g\_\_', u's\_\_']  
>bacteria', u'o\_\_Enterobacteriales', u'f\_\_Enterobacteriaceae', u'g\_\_', u's\_\_']  
t', u'o\_\_Actinomycetales', u'f\_\_Corynebacteriaceae', u'g\_\_Corynebacterium', u's\_\_']  
t', u'o\_\_Bifidobacteriales', u'f\_\_Bifidobacteriaceae', u'g\_\_Bifidobacterium', u's\_\_adolescentis']  
>bacteria', u'o\_\_Pseudomonadales', u'f\_\_Pseudomonadaceae', u'g\_\_Pseudomonas', u's\_\_']  
t', u'o\_\_Actinomycetales', u'f\_\_Corynebacteriaceae', u'g\_\_Corynebacterium', u's\_\_']  
>bacillales', u'f\_\_Streptococcaceae', u'g\_\_Streptococcus', u's\_\_']  
>bacillales', u'f\_\_Lactobacillaceae', u'g\_\_', u's\_\_']  
cteria', u'o\_\_Burkholderiales', u'f\_\_Oxalobacteraceae', u'g\_\_', u's\_\_']  
>bacillales', u'f\_\_Streptococcaceae', u'g\_\_Streptococcus', u's\_\_']  
>bacillales', u'f\_\_Streptococcaceae', u'g\_\_Streptococcus', u's\_\_']  
>bacteria', u'o\_\_Enterobacteriales', u'f\_\_Enterobacteriaceae', u'g\_\_', u's\_\_']  
:lostridiales', u'f\_\_Veillonellaceae', u'g\_\_Megasphaera', u's\_\_']  
cteria', u'o\_\_Burkholderiales', u'f\_\_Oxalobacteraceae', u'g\_\_', u's\_\_']  
'o\_\_Bacteroidales', u'f\_\_Porphyromonadaceae', u'g\_\_Parabacteroides', u's\_\_distasonis']  
'o\_\_Bacteroidales', u'f\_\_Porphyromonadaceae', u'g\_\_Parabacteroides', u's\_\_distasonis']  
'o\_\_Bacteroidales', u'f\_\_Bacteroidaceae', u'g\_\_Bacteroides', u's\_\_fragilis']  
>bacillales', u'f\_\_Streptococcaceae', u'g\_\_Streptococcus', u's\_\_']  
>bacillales', u'f\_\_Streptococcaceae', u'g\_\_Streptococcus', u's\_\_']  
>bacteria', u'o\_\_Pseudomonadales', u'f\_\_Pseudomonadaceae', u'g\_\_Pseudomonas', u's\_\_']  
:lostridiales', u'f\_\_Lachnospiraceae', u'g\_\_[Ruminococcus]', u's\_\_gnavus']  
cteria', u'o\_\_Burkholderiales', u'f\_\_Oxalobacteraceae', u'g\_\_', u's\_\_']  
>bacteria', u'o\_\_Enterobacteriales', u'f\_\_Enterobacteriaceae', u'g\_\_', u's\_\_']  
t', u'o\_\_Actinomycetales', u'f\_\_Corynebacteriaceae', u'g\_\_Corynebacterium', u's\_\_']  
t', u'o\_\_Bifidobacteriales', u'f\_\_Bifidobacteriaceae', u'g\_\_Bifidobacterium']  
>bacteria', u'o\_\_Enterobacteriales', u'f\_\_Enterobacteriaceae']  
>bacillales', u'f\_\_Streptococcaceae', u'g\_\_Streptococcus', u's\_\_']  
>bacillales', u'f\_\_Streptococcaceae', u'g\_\_Streptococcus', u's\_\_']  
t', u'o\_\_Actinomycetales', u'f\_\_Corynebacteriaceae', u'g\_\_Corynebacterium', u's\_\_']  
:lostridiales', u'f\_\_Peptostreptococcaceae', u'g\_\_', u's\_\_']  
:lostridiales', u'f\_\_Veillonellaceae', u'g\_\_Veillonella']  
lales', u'f\_\_Staphylococcaceae', u'g\_\_Staphylococcus', u's\_\_epidermidis']  
:lostridiales', u'f\_\_Veillonellaceae', u'g\_\_Veillonella', u's\_\_dispar']  
>bacillales', u'f\_\_Streptococcaceae', u'g\_\_Streptococcus', u's\_\_']  
:lostridiales', u'f\_\_Veillonellaceae', u'g\_\_Veillonella', u's\_\_parvula']  
>bacillales', u'f\_\_Streptococcaceae', u'g\_\_Streptococcus', u's\_\_']  
:lostridiales', u'f\_\_Lachnospiraceae', u'g\_\_[Ruminococcus]', u's\_\_gnavus']  
:lostridiales', u'f\_\_Lachnospiraceae', u'g\_\_', u's\_\_']  
:lostridiales', u'f\_\_Veillonellaceae', u'g\_\_Veillonella', u's\_\_']  
lales', u'f\_\_Staphylococcaceae', u'g\_\_Staphylococcus']  
'obiae', u'o\_\_Verrucomicrobiales', u'f\_\_Verrucomicrobiaceae', u'g\_\_Akkermansia', u's\_\_muciniphila']  
t', u'o\_\_Actinomycetales', u'f\_\_Corynebacteriaceae', u'g\_\_Corynebacterium', u's\_\_']  
:lostridiales', u'f\_\_Veillonellaceae', u'g\_\_Veillonella', u's\_\_']  
t', u'o\_\_Actinomycetales', u'f\_\_Nocardiodaceae', u'g\_\_', u's\_\_']  
t', u'o\_\_Actinomycetales', u'f\_\_Corynebacteriaceae', u'g\_\_Corynebacterium', u's\_\_']  
t', u'o\_\_Actinomycetales', u'f\_\_Nocardiodaceae', u'g\_\_', u's\_\_']  
>bacillales', u'f\_\_Streptococcaceae', u'g\_\_Streptococcus', u's\_\_']  
t', u'o\_\_Actinomycetales', u'f\_\_Corynebacteriaceae', u'g\_\_Corynebacterium', u's\_\_']  
t', u'o\_\_Actinomycetales', u'f\_\_Corynebacteriaceae', u'g\_\_Corynebacterium', u's\_\_']  
:lostridiales', u'f\_\_Veillonellaceae', u'g\_\_Veillonella', u's\_\_dispar']  
>bacillales', u'f\_\_Streptococcaceae', u'g\_\_Streptococcus', u's\_\_']  
:lostridiales', u'f\_\_Veillonellaceae', u'g\_\_Veillonella', u's\_\_parvula']  
t', u'o\_\_Actinomycetales', u'f\_\_Corynebacteriaceae', u'g\_\_Corynebacterium', u's\_\_']

'o\_\_Bacteroidales', u'f\_\_Porphyromonadaceae', u'g\_\_Parabacteroides', u's\_\_distasonis']  
:lostridiales', u'f\_\_Clostridiaceae', u'g\_\_', u's\_\_']  
i', u'o\_\_Actinomycetales', u'f\_\_Corynebacteriaceae', u'g\_\_Corynebacterium', u's\_\_']  
'o\_\_Bacteroidales', u'f\_\_Bacteroidaceae', u'g\_\_Bacteroides', u's\_\_uniformis']  
:lostridiales', u'f\_\_Clostridiaceae', u'g\_\_', u's\_\_']  
>bacillales', u'f\_\_Aerococcaceae', u'g\_\_Alloiococcus', u's\_\_']  
:lostridiales', u'f\_\_Veillonellaceae', u'g\_\_Veillonella', u's\_\_parvula']  
:lostridiales', u'f\_\_Lachnospiraceae', u'g\_\_[Ruminococcus]', u's\_\_gnavus']  
'o\_\_Bacteroidales', u'f\_\_Bacteroidaceae', u'g\_\_Bacteroides', u's\_\_']  
>bacillales', u'f\_\_Streptococcaceae', u'g\_\_Streptococcus', u's\_\_']  
:lostridiales', u'f\_\_Ruminococcaceae', u'g\_\_', u's\_\_']  
'o\_\_Bacteroidales', u'f\_\_Prevotellaceae', u'g\_\_Prevotella', u's\_\_']  
>bacteria', u'o\_\_Enterobacteriales', u'f\_\_Enterobacteriaceae', u'g\_\_Proteus', u's\_\_']  
'o\_\_Bacteroidales', u'f\_\_Porphyromonadaceae', u'g\_\_Parabacteroides', u's\_\_distasonis']  
>bacteria', u'o\_\_Pseudomonadales', u'f\_\_Moraxellaceae', u'g\_\_Moraxella', u's\_\_']  
i', u'o\_\_Actinomycetales', u'f\_\_Corynebacteriaceae', u'g\_\_Corynebacterium', u's\_\_']  
>bacillales', u'f\_\_Streptococcaceae', u'g\_\_Streptococcus', u's\_\_']  
'o\_\_Bacteroidales', u'f\_\_Bacteroidaceae', u'g\_\_Bacteroides', u's\_\_acidifaciens']  
>bacillales', u'f\_\_Streptococcaceae', u'g\_\_Streptococcus', u's\_\_']  
>bacillales', u'f\_\_Aerococcaceae', u'g\_\_Alloiococcus', u's\_\_']  
>bacillales', u'f\_\_Streptococcaceae', u'g\_\_Streptococcus', u's\_\_']  
'o\_\_Bacteroidales', u'f\_\_Bacteroidaceae', u'g\_\_Bacteroides', u's\_\_fragilis']  
i', u'o\_\_Actinomycetales', u'f\_\_Corynebacteriaceae', u'g\_\_Corynebacterium', u's\_\_']  
>bacillales', u'f\_\_Streptococcaceae', u'g\_\_Lactococcus', u's\_\_']  
acteria', u'o\_\_Rhodobacterales', u'f\_\_Rhodobacteraceae', u'g\_\_Rubellimicrobium', u's\_\_']  
'o\_\_Bacteroidales', u'f\_\_Bacteroidaceae', u'g\_\_Bacteroides', u's\_\_fragilis']  
>bacillales', u'f\_\_Carnobacteriaceae', u'g\_\_Granulicatella', u's\_\_']  
>bacillales', u'f\_\_Streptococcaceae', u'g\_\_Streptococcus', u's\_\_']  
'o\_\_Bacteroidales', u'f\_\_Porphyromonadaceae', u'g\_\_Parabacteroides', u's\_\_distasonis']  
:lostridiales', u'f\_\_Lachnospiraceae', u'g\_\_Coprococcus', u's\_\_']  
:lostridiales', u'f\_\_Lachnospiraceae', u'g\_\_Lachnospira', u's\_\_']  
:lostridiales', u'f\_\_Ruminococcaceae', u'g\_\_Oscillospira', u's\_\_']  
:lostridiales', u'f\_\_Clostridiaceae', u'g\_\_', u's\_\_']

i', u'o\_\_Actinomycetales', u'f\_\_Corynebacteriaceae', u'g\_\_Corynebacterium', u's\_\_']  
lales', u'f\_\_Planococcaceae', u'g\_\_', u's\_\_']  
>bacillales', u'f\_\_Streptococcaceae', u'g\_\_Streptococcus', u's\_\_']  
', u'o\_\_Coriobacteriales', u'f\_\_Coriobacteriaceae', u'g\_\_Eggerthella', u's\_\_lenta']  
i', u'o\_\_Actinomycetales', u'f\_\_Corynebacteriaceae', u'g\_\_Corynebacterium', u's\_\_']  
acteria', u'o\_\_Burkholderiales', u'f\_\_Comamonadaceae', u'g\_\_Delftia', u's\_\_']  
>bacillales', u'f\_\_Streptococcaceae', u'g\_\_Streptococcus', u's\_\_']  
'o\_\_Bacteroidales', u'f\_\_Prevotellaceae', u'g\_\_Prevotella', u's\_\_']  
i', u'o\_\_Actinomycetales', u'f\_\_Pseudonocardiaceae', u'g\_\_Pseudonocardia', u's\_\_']  
>bacillales', u'f\_\_Streptococcaceae', u'g\_\_Streptococcus', u's\_\_']  
i', u'o\_\_Bifidobacteriales', u'f\_\_Bifidobacteriaceae', u'g\_\_Bifidobacterium']  
>bacillales', u'f\_\_Streptococcaceae', u'g\_\_Streptococcus', u's\_\_']  
:lostridiales', u'f\_\_Veillonellaceae', u'g\_\_Veillonella', u's\_\_parvula']  
>bacillales', u'f\_\_Streptococcaceae', u'g\_\_Streptococcus', u's\_\_']  
>bacillales', u'f\_\_Streptococcaceae', u'g\_\_Streptococcus', u's\_\_']  
>bacteria', u'o\_\_Enterobacteriales', u'f\_\_Enterobacteriaceae', u'g\_\_Citrobacter', u's\_\_']  
'obiae', u'o\_\_Verrucomicrobiales', u'f\_\_Verrucomicrobiaceae', u'g\_\_Akkermansia', u's\_\_muciniphila']  
:lostridiales', u'f\_\_Lachnospiraceae', u'g\_\_[Ruminococcus]', u's\_\_gnavus']  
lales', u'f\_\_Staphylococcaceae', u'g\_\_Staphylococcus']  
>bacillales']  
:lostridiales', u'f\_\_Veillonellaceae', u'g\_\_Veillonella', u's\_\_']  
>bacteria', u'o\_\_Enterobacteriales', u'f\_\_Enterobacteriaceae', u'g\_\_Trabulsiiella']

i', u'o\_\_Actinomycetales', u'f\_\_Corynebacteriaceae', u'g\_\_Corynebacterium', u's\_\_']  
 i', u'o\_\_Actinomycetales', u'f\_\_Corynebacteriaceae', u'g\_\_Corynebacterium', u's\_\_']  
 :lostridiales', u'f\_\_Lachnospiraceae', u'g\_\_', u's\_\_']  
 i', u'o\_\_Actinomycetales', u'f\_\_Corynebacteriaceae', u'g\_\_Corynebacterium', u's\_\_']  
 :lostridiales', u'f\_\_Lachnospiraceae']  
 :lostridiales', u'f\_\_Lachnospiraceae', u'g\_\_[Ruminococcus]', u's\_\_gnavus']  
 obacteria', u'o\_\_Pseudomonadales', u'f\_\_Pseudomonadaceae', u'g\_\_Pseudomonas', u's\_\_']  
 :lostridiales', u'f\_\_Lachnospiraceae', u'g\_\_Dorea', u's\_\_']  
 obacillales', u'f\_\_Streptococcaceae', u'g\_\_Streptococcus', u's\_\_']  
 'o\_\_Bacteroidales', u'f\_\_Porphyromonadaceae', u'g\_\_Parabacteroides', u's\_\_distasonis']  
 obacillales', u'f\_\_Streptococcaceae', u'g\_\_Streptococcus', u's\_\_']  
 cteria', u'o\_\_Burkholderiales', u'f\_\_Alcaligenaceae', u'g\_\_Sutterella', u's\_\_']  
 lales', u'f\_\_Staphylococcaceae', u'g\_\_Staphylococcus', u's\_\_']  
 obacillales', u'f\_\_Aerococcaceae', u'g\_\_Alloiococcus', u's\_\_']  
 :lostridiales', u'f\_\_Lachnospiraceae']  
 obacillales', u'f\_\_Streptococcaceae', u'g\_\_Streptococcus', u's\_\_']  
 obacillales', u'f\_\_Aerococcaceae', u'g\_\_Alloiococcus', u's\_\_']  
 'o\_\_Bacteroidales', u'f\_\_Bacteroidaceae', u'g\_\_Bacteroides', u's\_\_ovatus']  
 obacillales', u'f\_\_Streptococcaceae', u'g\_\_Streptococcus', u's\_\_']  
 acteria', u'o\_\_Rickettsiales', u'f\_\_mitochondria', u'g\_\_', u's\_\_']  
 obacillales', u'f\_\_Streptococcaceae', u'g\_\_Streptococcus', u's\_\_']  
 i', u'o\_\_Bifidobacteriales', u'f\_\_Bifidobacteriaceae', u'g\_\_Bifidobacterium', u's\_\_']  
 i', u'o\_\_Actinomycetales', u'f\_\_Corynebacteriaceae', u'g\_\_Corynebacterium', u's\_\_']  
 obacillales', u'f\_\_Streptococcaceae', u'g\_\_Streptococcus', u's\_\_']  
 obacillales', u'f\_\_Aerococcaceae', u'g\_\_Alloiococcus', u's\_\_']  
 obacillales', u'f\_\_Streptococcaceae', u'g\_\_Streptococcus', u's\_\_']  
 obacillales', u'f\_\_Streptococcaceae', u'g\_\_Streptococcus', u's\_\_']  
 obacteria', u'o\_\_Enterobacteriales', u'f\_\_Enterobacteriaceae', u'g\_\_', u's\_\_']  
 obacteria', u'o\_\_Enterobacteriales', u'f\_\_Enterobacteriaceae', u'g\_\_', u's\_\_']  
 obacillales', u'f\_\_Lactobacillaceae', u'g\_\_Lactobacillus', u's\_\_']  
 obacillales', u'f\_\_Streptococcaceae', u'g\_\_Streptococcus', u's\_\_']  
 i', u'o\_\_Bifidobacteriales', u'f\_\_Bifidobacteriaceae', u'g\_\_Bifidobacterium', u's\_\_']  
 o\_\_Erysipelotrichales', u'f\_\_Erysipelotrichaceae', u'g\_\_', u's\_\_']  
 obacillales', u'f\_\_Streptococcaceae', u'g\_\_Streptococcus', u's\_\_']  
 i', u'o\_\_Bifidobacteriales', u'f\_\_Bifidobacteriaceae', u'g\_\_Bifidobacterium', u's\_\_adolescentis']  
 :lostridiales', u'f\_\_Lachnospiraceae', u'g\_\_[Ruminococcus]', u's\_\_gnavus']  
 cteria', u'o\_\_Neisseriales', u'f\_\_Neisseriaceae', u'g\_\_', u's\_\_']  
 obacteria', u'o\_\_Enterobacteriales', u'f\_\_Enterobacteriaceae', u'g\_\_', u's\_\_']  
 obacillales', u'f\_\_Streptococcaceae', u'g\_\_Streptococcus', u's\_\_']  
 obacillales', u'f\_\_Streptococcaceae', u'g\_\_Streptococcus', u's\_\_']  
 o\_\_Erysipelotrichales', u'f\_\_Erysipelotrichaceae', u'g\_\_[Eubacterium]', u's\_\_dolichum']  
 obacillales', u'f\_\_Streptococcaceae', u'g\_\_Streptococcus', u's\_\_']  
 'o\_\_Bacteroidales', u'f\_\_Porphyromonadaceae', u'g\_\_Parabacteroides', u's\_\_distasonis']  
 obacillales', u'f\_\_Streptococcaceae', u'g\_\_Streptococcus', u's\_\_']  
 'o\_\_Bacteroidales', u'f\_\_Bacteroidaceae', u'g\_\_Bacteroides', u's\_\_']  
 obacteria', u'o\_\_Pseudomonadales', u'f\_\_Moraxellaceae', u'g\_\_', u's\_\_']  
 :lostridiales', u'f\_\_Veillonellaceae', u'g\_\_Veillonella', u's\_\_dispar']  
 acteria', u'o\_\_Rhodobacterales', u'f\_\_Rhodobacteraceae', u'g\_\_Paracoccus', u's\_\_aminovorans']  
 i', u'o\_\_Bifidobacteriales', u'f\_\_Bifidobacteriaceae', u'g\_\_Bifidobacterium', u's\_\_']  
 i', u'o\_\_Actinomycetales', u'f\_\_Corynebacteriaceae', u'g\_\_Corynebacterium', u's\_\_']  
 :lostridiales', u'f\_\_Veillonellaceae', u'g\_\_Dialister', u's\_\_']  
 obacillales', u'f\_\_Streptococcaceae', u'g\_\_Streptococcus', u's\_\_']  
 i', u'o\_\_Actinomycetales', u'f\_\_Corynebacteriaceae', u'g\_\_Corynebacterium', u's\_\_']  
 obacillales', u'f\_\_Streptococcaceae', u'g\_\_Streptococcus', u's\_\_']  
 obacteria', u'o\_\_Enterobacteriales', u'f\_\_Enterobacteriaceae', u'g\_\_', u's\_\_']  
 :lostridiales', u'f\_\_Lachnospiraceae', u'g\_\_Blautia', u's\_\_']

>bacillales']  
 i', u'o\_\_Actinomycetales', u'f\_\_Actinomycetaceae', u'g\_\_Actinomyces', u's\_\_']  
 >bacillales', u'f\_\_Aerococcaceae', u'g\_\_Alloiococcus', u's\_\_']  
 >bacteria', u'o\_\_Enterobacteriales', u'f\_\_Enterobacteriaceae', u'g\_\_', u's\_\_']  
 >bacillales', u'f\_\_Aerococcaceae', u'g\_\_Alloiococcus', u's\_\_']  
 >bacteria', u'o\_\_Pasteurellales', u'f\_\_Pasteurellaceae', u'g\_\_Haemophilus', u's\_\_influenzae']  
 >bacteria', u'o\_\_Enterobacteriales', u'f\_\_Enterobacteriaceae', u'g\_\_', u's\_\_']  
 :lostridiales', u'f\_\_Clostridiaceae', u'g\_\_', u's\_\_']  
 >bacteria', u'o\_\_Pasteurellales', u'f\_\_Pasteurellaceae', u'g\_\_Haemophilus', u's\_\_']  
 'o\_\_Bacteroidales', u'f\_\_Bacteroidaceae', u'g\_\_Bacteroides', u's\_\_']  
 >bacteria', u'o\_\_Enterobacteriales', u'f\_\_Enterobacteriaceae', u'g\_\_', u's\_\_']  
 >\_\_Erysipelotrichales', u'f\_\_Erysipelotrichaceae', u'g\_\_', u's\_\_']  
 :lostridiales', u'f\_\_Lachnospiraceae', u'g\_\_', u's\_\_']  
 >bacteria', u'o\_\_Enterobacteriales', u'f\_\_Enterobacteriaceae', u'g\_\_', u's\_\_']  
 >bacillales', u'f\_\_Streptococcaceae', u'g\_\_Streptococcus', u's\_\_']  
 :lostridiales', u'f\_\_Lachnospiraceae', u'g\_\_[Ruminococcus]', u's\_\_gnavus']  
 :lostridiales', u'f\_\_Ruminococcaceae', u'g\_\_', u's\_\_']  
 :lostridiales', u'f\_\_Lachnospiraceae', u'g\_\_', u's\_\_']  
 >bacteria', u'o\_\_Enterobacteriales', u'f\_\_Enterobacteriaceae', u'g\_\_', u's\_\_']  
 >bacillales', u'f\_\_Streptococcaceae', u'g\_\_Streptococcus', u's\_\_']  
 :lostridiales', u'f\_\_Lachnospiraceae', u'g\_\_[Ruminococcus]', u's\_\_gnavus']  
 >bacillales', u'f\_\_Streptococcaceae', u'g\_\_Streptococcus', u's\_\_']  
 :lostridiales', u'f\_\_Veillonellaceae', u'g\_\_Veillonella', u's\_\_parvula']  
 >bacillales', u'f\_\_Streptococcaceae', u'g\_\_Streptococcus', u's\_\_']  
 :lostridiales', u'f\_\_Veillonellaceae', u'g\_\_Veillonella', u's\_\_dispar']  
 >bacillales', u'f\_\_Streptococcaceae', u'g\_\_Streptococcus', u's\_\_']  
 i', u'o\_\_Actinomycetales', u'f\_\_Corynebacteriaceae', u'g\_\_Corynebacterium', u's\_\_']  
 i', u'o\_\_Bifidobacteriales', u'f\_\_Bifidobacteriaceae', u'g\_\_Bifidobacterium', u's\_\_longum']  
 :lostridiales', u'f\_\_Lachnospiraceae', u'g\_\_Coprococcus', u's\_\_']  
 'o\_\_Bacteroidales', u'f\_\_Bacteroidaceae', u'g\_\_Bacteroides', u's\_\_']  
 lales', u'f\_\_Staphylococcaceae', u'g\_\_Staphylococcus', u's\_\_']  
 >bacillales', u'f\_\_Streptococcaceae', u'g\_\_Streptococcus', u's\_\_']  
 :lostridiales', u'f\_\_Lachnospiraceae', u'g\_\_', u's\_\_']  
 'o\_\_Bacteroidales', u'f\_\_Bacteroidaceae', u'g\_\_Bacteroides', u's\_\_']  
 >bacteria', u'o\_\_Enterobacteriales', u'f\_\_Enterobacteriaceae', u'g\_\_', u's\_\_']  
 :lostridiales', u'f\_\_Peptostreptococcaceae', u'g\_\_', u's\_\_']  
 :lostridiales', u'f\_\_Ruminococcaceae', u'g\_\_Oscillospira', u's\_\_']  
 >bacillales', u'f\_\_Enterococcaceae', u'g\_\_Enterococcus', u's\_\_']  
 >bacillales', u'f\_\_Streptococcaceae', u'g\_\_Streptococcus', u's\_\_']  
 >bacteria', u'o\_\_Enterobacteriales', u'f\_\_Enterobacteriaceae', u'g\_\_', u's\_\_']  
 >bacillales', u'f\_\_Streptococcaceae', u'g\_\_Streptococcus', u's\_\_']  
 >bacillales', u'f\_\_Streptococcaceae', u'g\_\_Streptococcus', u's\_\_']  
 >bacillales', u'f\_\_Streptococcaceae', u'g\_\_Streptococcus', u's\_\_']  
 :lostridiales', u'f\_\_Lachnospiraceae', u'g\_\_Dorea', u's\_\_']  
 >bacteria', u'o\_\_Pasteurellales', u'f\_\_Pasteurellaceae', u'g\_\_Haemophilus', u's\_\_']  
 >bacillales', u'f\_\_Streptococcaceae', u'g\_\_Streptococcus', u's\_\_']  
 i', u'o\_\_Bifidobacteriales', u'f\_\_Bifidobacteriaceae', u'g\_\_Bifidobacterium']  
 >bacteria', u'o\_\_Enterobacteriales', u'f\_\_Enterobacteriaceae', u'g\_\_', u's\_\_']  
 >bacteria', u'o\_\_Pseudomonadales', u'f\_\_Moraxellaceae', u'g\_\_Moraxella', u's\_\_']  
 >bacteria', u'o\_\_Pseudomonadales', u'f\_\_Moraxellaceae', u'g\_\_', u's\_\_']  
 cteria', u'o\_\_Burkholderiales', u'f\_\_Oxalobacteraceae', u'g\_\_', u's\_\_']  
 lales', u'f\_\_Staphylococcaceae', u'g\_\_Staphylococcus', u's\_\_']  
 i', u'o\_\_Actinomycetales', u'f\_\_Corynebacteriaceae', u'g\_\_Corynebacterium', u's\_\_']  
 :lostridiales', u'f\_\_Veillonellaceae', u'g\_\_Megasphaera', u's\_\_']  
 :lostridiales', u'f\_\_Clostridiaceae', u'g\_\_Clostridium', u's\_\_neonatale']  
 :lostridiales', u'f\_\_Veillonellaceae', u'g\_\_Veillonella', u's\_\_dispar']

lales', u'f\_\_Staphylococcaceae', u'g\_\_Staphylococcus', u's\_\_']  
 >bacillales', u'f\_\_Streptococcaceae', u'g\_\_Streptococcus', u's\_\_infantis']  
 >bacillales', u'f\_\_Streptococcaceae', u'g\_\_Streptococcus', u's\_\_']  
 >bacteria', u'o\_\_Enterobacteriales', u'f\_\_Enterobacteriaceae', u'g\_\_', u's\_\_']  
 'o\_\_Bacteroidales', u'f\_\_Porphyromonadaceae', u'g\_\_Parabacteroides', u's\_\_distasonis']  
 'o\_\_Bacteroidales', u'f\_\_Porphyromonadaceae', u'g\_\_Parabacteroides', u's\_\_']  
 cteria', u'o\_\_Burkholderiales', u'f\_\_Comamonadaceae', u'g\_\_', u's\_\_']  
 i', u'o\_\_Bifidobacteriales', u'f\_\_Bifidobacteriaceae', u'g\_\_Bifidobacterium', u's\_\_']  
 'o\_\_Bacteroidales', u'f\_\_Porphyromonadaceae', u'g\_\_Parabacteroides', u's\_\_distasonis']  
 'o\_\_Bacteroidales', u'f\_\_Porphyromonadaceae', u'g\_\_Parabacteroides', u's\_\_distasonis']  
 :lostridiales', u'f\_\_Lachnospiraceae', u'g\_\_Coprococcus', u's\_\_']  
 >bacillales', u'f\_\_Streptococcaceae', u'g\_\_Streptococcus', u's\_\_']  
 >bacillales', u'f\_\_Streptococcaceae', u'g\_\_Streptococcus', u's\_\_']  
 >\_\_Erysipelotrichales', u'f\_\_Erysipelotrichaceae', u'g\_\_', u's\_\_']

>bacillales', u'f\_\_Streptococcaceae', u'g\_\_Streptococcus', u's\_\_']  
 cteria', u'o\_\_Burkholderiales', u'f\_\_Alcaligenaceae', u'g\_\_Sutterella', u's\_\_']  
 >bacteria', u'o\_\_Pseudomonadales', u'f\_\_Moraxellaceae', u'g\_\_Moraxella', u's\_\_']  
 i', u'o\_\_Actinomycetales', u'f\_\_Corynebacteriaceae', u'g\_\_Corynebacterium', u's\_\_']  
 :lostridiales', u'f\_\_Lachnospiraceae', u'g\_\_Coprococcus', u's\_\_']  
 >bacillales', u'f\_\_Streptococcaceae', u'g\_\_Streptococcus', u's\_\_']  
 acteria', u'o\_\_Rhodospirillales', u'f\_\_Rhodospirillaceae', u'g\_\_', u's\_\_']  
 >bacillales', u'f\_\_Streptococcaceae', u'g\_\_Streptococcus', u's\_\_']  
 >bacteria', u'o\_\_Enterobacteriales', u'f\_\_Enterobacteriaceae', u'g\_\_', u's\_\_']  
 >bacteria', u'o\_\_Enterobacteriales', u'f\_\_Enterobacteriaceae', u'g\_\_', u's\_\_']  
 :lostridiales', u'f\_\_Lachnospiraceae', u'g\_\_Blautia', u's\_\_']  
 >bacillales', u'f\_\_Streptococcaceae', u'g\_\_Streptococcus', u's\_\_']  
 >bacillales', u'f\_\_Streptococcaceae', u'g\_\_Streptococcus', u's\_\_']  
 >bacteria', u'o\_\_Pseudomonadales', u'f\_\_Pseudomonadaceae', u'g\_\_Pseudomonas', u's\_\_']  
 >bacillales', u'f\_\_Streptococcaceae', u'g\_\_Streptococcus', u's\_\_']  
 >bacteria', u'o\_\_Enterobacteriales', u'f\_\_Enterobacteriaceae', u'g\_\_', u's\_\_']  
 >bacillales', u'f\_\_Streptococcaceae', u'g\_\_Streptococcus', u's\_\_']  
 >bacteria', u'o\_\_Enterobacteriales', u'f\_\_Enterobacteriaceae']  
 lales', u'f\_\_Bacillaceae', u'g\_\_Bacillus', u's\_\_']  
 >\_\_Erysipelotrichales', u'f\_\_Erysipelotrichaceae', u'g\_\_', u's\_\_']  
 lales', u'f\_\_Staphylococcaceae', u'g\_\_Staphylococcus']  
 'obiae', u'o\_\_Verrucomicrobiales', u'f\_\_Verrucomicrobiaceae', u'g\_\_Akkermansia', u's\_\_muciniphila']  
 >bacillales', u'f\_\_Streptococcaceae', u'g\_\_Streptococcus', u's\_\_']  
 'o\_\_Bacteroidales', u'f\_\_Bacteroidaceae', u'g\_\_Bacteroides', u's\_\_']  
 :lostridiales', u'f\_\_Clostridiaceae', u'g\_\_Clostridium', u's\_\_neonatale']  
 >bacteria', u'o\_\_Enterobacteriales', u'f\_\_Enterobacteriaceae', u'g\_\_', u's\_\_']  
 'o\_\_Bacteroidales', u'f\_\_Porphyromonadaceae', u'g\_\_Parabacteroides', u's\_\_distasonis']  
 >bacillales', u'f\_\_Aerococcaceae', u'g\_\_Alloiococcus', u's\_\_']  
 i', u'o\_\_Actinomycetales', u'f\_\_Corynebacteriaceae', u'g\_\_Corynebacterium', u's\_\_']  
 'o\_\_Bacteroidales', u'f\_\_Bacteroidaceae', u'g\_\_Bacteroides', u's\_\_']  
 >bacteria', u'o\_\_Enterobacteriales', u'f\_\_Enterobacteriaceae', u'g\_\_', u's\_\_']  
 i', u'o\_\_Bifidobacteriales', u'f\_\_Bifidobacteriaceae', u'g\_\_Bifidobacterium']  
 'o\_\_Bacteroidales', u'f\_\_Bacteroidaceae', u'g\_\_Bacteroides', u's\_\_']  
 :lostridiales', u'f\_\_Clostridiaceae', u'g\_\_Clostridium', u's\_\_neonatale']  
 'o\_\_Bacteroidales', u'f\_\_Bacteroidaceae', u'g\_\_Bacteroides', u's\_\_']  
 cteria', u'o\_\_Rhodocyclales', u'f\_\_Rhodocyclaceae']  
 cteria']  
 ', u'o\_\_Coriobacteriales', u'f\_\_Coriobacteriaceae', u'g\_\_Collinsella', u's\_\_stercoris']  
 >bacteria', u'o\_\_Enterobacteriales', u'f\_\_Enterobacteriaceae', u'g\_\_', u's\_\_']  
 >bacillales', u'f\_\_Streptococcaceae', u'g\_\_Streptococcus', u's\_\_']  
 'o\_\_Bacteroidales', u'f\_\_Bacteroidaceae', u'g\_\_Bacteroides', u's\_\_ovatus']

'o\_\_Bacteroidales', u'f\_\_Porphyromonadaceae', u'g\_\_Parabacteroides', u's\_\_distasonis']  
:lostridiales', u'f\_\_Lachnospiraceae', u'g\_\_Dorea', u's\_\_']  
'o\_\_Bacteroidales', u'f\_\_Bacteroidaceae', u'g\_\_Bacteroides', u's\_\_']  
:lostridiales', u'f\_\_Lachnospiraceae', u'g\_\_Blautia', u's\_\_']  
>bacillales', u'f\_\_Enterococcaceae', u'g\_\_Enterococcus', u's\_\_']  
:lostridiales', u'f\_\_', u'g\_\_', u's\_\_']  
>bacillales', u'f\_\_Streptococcaceae', u'g\_\_Streptococcus', u's\_\_']  
:lostridiales', u'f\_\_Lachnospiraceae', u'g\_\_[Ruminococcus]', u's\_\_gnavus']  
>bacteria', u'o\_\_Enterobacteriales', u'f\_\_Enterobacteriaceae', u'g\_\_', u's\_\_']  
:lostridiales', u'f\_\_Lachnospiraceae', u'g\_\_Dorea', u's\_\_']  
>bacteria', u'o\_\_Enterobacteriales', u'f\_\_Enterobacteriaceae', u'g\_\_', u's\_\_']  
:lostridiales', u'f\_\_Ruminococcaceae', u'g\_\_Ruminococcus', u's\_\_']  
>bacillales', u'f\_\_Aerococcaceae', u'g\_\_Alloiococcus', u's\_\_']  
t', u'o\_\_Actinomycetales', u'f\_\_Corynebacteriaceae', u'g\_\_Corynebacterium', u's\_\_']  
>bacteria', u'o\_\_Enterobacteriales', u'f\_\_Enterobacteriaceae', u'g\_\_', u's\_\_']  
lales']  
>bacillales', u'f\_\_Streptococcaceae', u'g\_\_Streptococcus', u's\_\_']  
>bacillales', u'f\_\_Streptococcaceae', u'g\_\_Streptococcus', u's\_\_']  
>bacteria', u'o\_\_Enterobacteriales', u'f\_\_Enterobacteriaceae', u'g\_\_', u's\_\_']  
>bacillales', u'f\_\_Streptococcaceae', u'g\_\_Streptococcus', u's\_\_']  
>bacillales', u'f\_\_Streptococcaceae', u'g\_\_Streptococcus', u's\_\_']  
>bacillales', u'f\_\_Enterococcaceae', u'g\_\_Enterococcus', u's\_\_']  
>bacillales', u'f\_\_Aerococcaceae', u'g\_\_Alloiococcus', u's\_\_']  
>bacillales', u'f\_\_Aerococcaceae', u'g\_\_Alloiococcus', u's\_\_']  
>bacillales', u'f\_\_Enterococcaceae', u'g\_\_Enterococcus', u's\_\_']  
t', u'o\_\_Actinomycetales', u'f\_\_Corynebacteriaceae', u'g\_\_Corynebacterium', u's\_\_']  
>bacillales', u'f\_\_Streptococcaceae', u'g\_\_Streptococcus', u's\_\_']  
>bacillales', u'f\_\_Lactobacillaceae', u'g\_\_Lactobacillus', u's\_\_zeae']  
>bacillales', u'f\_\_Streptococcaceae', u'g\_\_Streptococcus', u's\_\_']  
'o\_\_Bacteroidales', u'f\_\_Porphyromonadaceae', u'g\_\_Parabacteroides', u's\_\_distasonis']  
>bacillales', u'f\_\_Streptococcaceae', u'g\_\_Streptococcus', u's\_\_']  
>bacillales', u'f\_\_Streptococcaceae', u'g\_\_Streptococcus', u's\_\_']  
>bacillales', u'f\_\_Streptococcaceae', u'g\_\_Streptococcus', u's\_\_']  
>bacteria', u'o\_\_Enterobacteriales', u'f\_\_Enterobacteriaceae', u'g\_\_', u's\_\_']  
acteria', u'o\_\_Rhizobiales', u'f\_\_Bradyrhizobiaceae', u'g\_\_', u's\_\_']  
>bacillales', u'f\_\_Aerococcaceae', u'g\_\_Alloiococcus', u's\_\_']  
lales', u'f\_\_Paenibacillaceae', u'g\_\_Paenibacillus', u's\_\_']  
'o\_\_Bacteroidales', u'f\_\_Porphyromonadaceae', u'g\_\_Parabacteroides', u's\_\_distasonis']  
>bacillales', u'f\_\_Streptococcaceae', u'g\_\_Streptococcus', u's\_\_']  
>bacteria', u'o\_\_Pasteurellales', u'f\_\_Pasteurellaceae', u'g\_\_Haemophilus', u's\_\_']  
acteria', u'o\_\_Burkholderiales', u'f\_\_Alcaligenaceae', u'g\_\_Sutterella', u's\_\_']  
>\_\_Erysipelotrichales', u'f\_\_Erysipelotrichaceae', u'g\_\_', u's\_\_']  
:lostridiales', u'f\_\_Ruminococcaceae', u'g\_\_Faecalibacterium', u's\_\_prausnitzii']  
>bacillales', u'f\_\_Streptococcaceae', u'g\_\_Streptococcus', u's\_\_']  
t', u'o\_\_Actinomycetales', u'f\_\_Corynebacteriaceae', u'g\_\_Corynebacterium', u's\_\_']  
'o\_\_Bacteroidales', u'f\_\_Prevotellaceae', u'g\_\_Prevotella', u's\_\_']  
>bacillales', u'f\_\_Lactobacillaceae', u'g\_\_Lactobacillus', u's\_\_']  
:lostridiales']  
acteria', u'o\_\_Burkholderiales', u'f\_\_Oxalobacteraceae', u'g\_\_', u's\_\_']  
>bacillales', u'f\_\_Streptococcaceae', u'g\_\_Streptococcus', u's\_\_']  
>bacillales', u'f\_\_Streptococcaceae', u'g\_\_Streptococcus', u's\_\_']  
>bacillales', u'f\_\_Streptococcaceae', u'g\_\_Streptococcus', u's\_\_']  
:lostridiales', u'f\_\_Veillonellaceae', u'g\_\_Megasphaera', u's\_\_']  
:lostridiales', u'f\_\_Veillonellaceae', u'g\_\_Veillonella', u's\_\_parvula']  
>bacillales', u'f\_\_Streptococcaceae', u'g\_\_Streptococcus', u's\_\_']  
>bacillales', u'f\_\_Streptococcaceae', u'g\_\_Streptococcus', u's\_\_']



cteria', u'o\_\_Burkholderiales', u'f\_\_Comamonadaceae', u'g\_\_', u's\_\_']  
 :lostridiales', u'f\_\_Lachnospiraceae']  
 :lostridiales', u'f\_\_Veillonellaceae', u'g\_\_Veillonella', u's\_\_']  
 :lostridiales', u'f\_\_Veillonellaceae', u'g\_\_Veillonella', u's\_\_dispar']  
 >bacteria', u'o\_\_Pseudomonadales', u'f\_\_Moraxellaceae', u'g\_\_Moraxella', u's\_\_']  
 :lostridiales', u'f\_\_Lachnospiraceae', u'g\_\_Coprococcus', u's\_\_']  
 >bacteria', u'o\_\_Enterobacteriales', u'f\_\_Enterobacteriaceae', u'g\_\_', u's\_\_']  
 lales', u'f\_\_Staphylococcaceae', u'g\_\_Staphylococcus']  
 >bacillales', u'f\_\_Streptococcaceae', u'g\_\_Streptococcus', u's\_\_']  
 lales', u'f\_\_Staphylococcaceae', u'g\_\_Staphylococcus', u's\_\_']  
 :lostridiales', u'f\_\_Veillonellaceae', u'g\_\_Megasphaera', u's\_\_']  
 :lostridiales', u'f\_\_Lachnospiraceae', u'g\_\_[Ruminococcus]', u's\_\_gnavus']  
 t', u'o\_\_Bifidobacteriales', u'f\_\_Bifidobacteriaceae', u'g\_\_Bifidobacterium', u's\_\_']  
 >bacteria', u'o\_\_Pseudomonadales', u'f\_\_Moraxellaceae', u'g\_\_Moraxella', u's\_\_']  
 >bacteria', u'o\_\_Enterobacteriales', u'f\_\_Enterobacteriaceae', u'g\_\_', u's\_\_']  
 cteria', u'o\_\_Neisseriales', u'f\_\_Neisseriaceae', u'g\_\_', u's\_\_']  
 :lostridiales', u'f\_\_Lachnospiraceae', u'g\_\_Dorea', u's\_\_']  
 :lostridiales', u'f\_\_Lachnospiraceae', u'g\_\_Blautia', u's\_\_producta']  
 t', u'o\_\_Actinomycetales', u'f\_\_Corynebacteriaceae', u'g\_\_Corynebacterium', u's\_\_']  
 >bacteria', u'o\_\_Enterobacteriales', u'f\_\_Enterobacteriaceae', u'g\_\_', u's\_\_']  
 >bacillales', u'f\_\_Streptococcaceae', u'g\_\_Streptococcus', u's\_\_']  
 >bacillales', u'f\_\_Streptococcaceae', u'g\_\_Streptococcus', u's\_\_']  
 lales', u'f\_\_Staphylococcaceae', u'g\_\_Staphylococcus', u's\_\_']  
 >bacillales', u'f\_\_Streptococcaceae', u'g\_\_Streptococcus', u's\_\_']  
 >bacillales', u'f\_\_Streptococcaceae', u'g\_\_Streptococcus', u's\_\_']  
 :lostridiales', u'f\_\_Clostridiaceae', u'g\_\_', u's\_\_']  
 >bacillales', u'f\_\_Streptococcaceae', u'g\_\_Streptococcus', u's\_\_']  
 t', u'o\_\_Actinomycetales', u'f\_\_Corynebacteriaceae', u'g\_\_Corynebacterium', u's\_\_']  
 >bacillales', u'f\_\_Streptococcaceae', u'g\_\_Streptococcus', u's\_\_']  
 >bacillales', u'f\_\_Streptococcaceae', u'g\_\_Streptococcus', u's\_\_']  
 :lostridiales', u'f\_\_Lachnospiraceae', u'g\_\_[Ruminococcus]', u's\_\_gnavus']  
 >bacteria', u'o\_\_Pasteurellales', u'f\_\_Pasteurellaceae', u'g\_\_Haemophilus', u's\_\_influenzae']  
 'o\_\_Bacteroidales', u'f\_\_Bacteroidaceae', u'g\_\_Bacteroides', u's\_\_']  
 :lostridiales', u'f\_\_Veillonellaceae', u'g\_\_Veillonella']  
 >bacteria', u'o\_\_Enterobacteriales', u'f\_\_Enterobacteriaceae', u'g\_\_', u's\_\_']  
 >bacillales', u'f\_\_Streptococcaceae', u'g\_\_Streptococcus', u's\_\_']  
 'o\_\_Bacteroidales', u'f\_\_Bacteroidaceae', u'g\_\_Bacteroides', u's\_\_ovatus']  
 lales', u'f\_\_Staphylococcaceae', u'g\_\_Staphylococcus', u's\_\_']  
 acteria', u'o\_\_Rhizobiales', u'f\_\_Phyllobacteriaceae', u'g\_\_Phyllobacterium', u's\_\_']  
 >bacteria', u'o\_\_Pasteurellales', u'f\_\_Pasteurellaceae', u'g\_\_Haemophilus', u's\_\_']  
 cteria', u'o\_\_Burkholderiales', u'f\_\_Comamonadaceae', u'g\_\_Delftia', u's\_\_']  
 >bacillales', u'f\_\_Streptococcaceae', u'g\_\_Streptococcus', u's\_\_']  
 acteria', u'o\_\_Sphingomonadales', u'f\_\_Sphingomonadaceae', u'g\_\_Novosphingobium', u's\_\_']  
 >bacillales', u'f\_\_Streptococcaceae', u'g\_\_Streptococcus', u's\_\_']  
 t', u'o\_\_Actinomycetales', u'f\_\_Corynebacteriaceae', u'g\_\_Corynebacterium', u's\_\_']  
 >bacteria', u'o\_\_Enterobacteriales', u'f\_\_Enterobacteriaceae', u'g\_\_', u's\_\_']  
 'o\_\_Bacteroidales', u'f\_\_[Paraprevotellaceae]', u'g\_\_Paraprevotella', u's\_\_']  
 >bacillales', u'f\_\_Streptococcaceae', u'g\_\_Streptococcus', u's\_\_']  
 :lostridiales', u'f\_\_Clostridiaceae', u'g\_\_Clostridium', u's\_\_neonatale']  
 :lostridiales', u'f\_\_Ruminococcaceae', u'g\_\_Oscillospira', u's\_\_']  
 :lostridiales', u'f\_\_Lachnospiraceae', u'g\_\_Blautia', u's\_\_']  
 >bacillales', u'f\_\_Streptococcaceae', u'g\_\_Streptococcus', u's\_\_']  
 :lostridiales', u'f\_\_Veillonellaceae', u'g\_\_Veillonella', u's\_\_parvula']  
 >bacillales', u'f\_\_Streptococcaceae', u'g\_\_Streptococcus', u's\_\_']  
 >bacillales', u'f\_\_Enterococcaceae', u'g\_\_Enterococcus', u's\_\_']  
 t', u'o\_\_Bifidobacteriales', u'f\_\_Bifidobacteriaceae', u'g\_\_Bifidobacterium', u's\_\_']

]bacteria', u'o\_\_Pseudomonadales']  
 :lostridiales', u'f\_\_Lachnospiraceae']  
 ]bacillales', u'f\_\_Streptococcaceae', u'g\_\_Streptococcus', u's\_\_']  
 ]o\_\_Streptophyta', u'f\_\_', u'g\_\_', u's\_\_']  
 ]bacillales', u'f\_\_Streptococcaceae', u'g\_\_Streptococcus', u's\_\_']  
 ]', u'o\_\_Actinomycetales', u'f\_\_Corynebacteriaceae', u'g\_\_Corynebacterium', u's\_\_']  
 ]', u'o\_\_Rubrobacterales', u'f\_\_Rubrobacteraceae', u'g\_\_Rubrobacter', u's\_\_']  
 ]', u'o\_\_Actinomycetales', u'f\_\_Corynebacteriaceae', u'g\_\_Corynebacterium', u's\_\_']  
 ]bacillales', u'f\_\_Streptococcaceae', u'g\_\_Lactococcus', u's\_\_']  
 ]bacillales', u'f\_\_Streptococcaceae', u'g\_\_Streptococcus', u's\_\_']  
 :lostridiales', u'f\_\_Lachnospiraceae', u'g\_\_Blautia', u's\_\_']  
 ]bacillales', u'f\_\_Streptococcaceae', u'g\_\_Streptococcus', u's\_\_']  
 ]bacteria', u'o\_\_Enterobacteriales', u'f\_\_Enterobacteriaceae', u'g\_\_', u's\_\_']  
 ]bacillales', u'f\_\_Streptococcaceae', u'g\_\_Streptococcus', u's\_\_']  
 ]bacillales', u'f\_\_Aerococcaceae', u'g\_\_Alloiococcus', u's\_\_']  
 ]bacillales', u'f\_\_Enterococcaceae', u'g\_\_Enterococcus']  
 :lostridiales', u'f\_\_Clostridiaceae', u'g\_\_', u's\_\_']  
 lales']  
 ]', u'o\_\_Actinomycetales', u'f\_\_Actinomycetaceae', u'g\_\_Actinomyces', u's\_\_']  
 ]bacillales', u'f\_\_Aerococcaceae', u'g\_\_Alloiococcus', u's\_\_']  
 ]o\_\_Bacteroidales', u'f\_\_Bacteroidaceae', u'g\_\_Bacteroides', u's\_\_caccae']  
 ]', u'o\_\_Bifidobacteriales', u'f\_\_Bifidobacteriaceae', u'g\_\_Bifidobacterium', u's\_\_adolescentis']  
 ]', u'o\_\_Bifidobacteriales', u'f\_\_Bifidobacteriaceae', u'g\_\_Bifidobacterium', u's\_\_adolescentis']  
 ]', u'o\_\_Bifidobacteriales', u'f\_\_Bifidobacteriaceae', u'g\_\_Bifidobacterium', u's\_\_adolescentis']  
 ]o\_\_Bacteroidales', u'f\_\_Bacteroidaceae', u'g\_\_Bacteroides', u's\_\_']  
 ]bacteria', u'o\_\_Pseudomonadales', u'f\_\_Pseudomonadaceae', u'g\_\_Pseudomonas', u's\_\_']  
 ]', u'o\_\_Actinomycetales', u'f\_\_Corynebacteriaceae', u'g\_\_Corynebacterium', u's\_\_']  
 ]bacillales', u'f\_\_Streptococcaceae', u'g\_\_Streptococcus']  
 ]', u'o\_\_Bifidobacteriales', u'f\_\_Bifidobacteriaceae', u'g\_\_Bifidobacterium', u's\_\_adolescentis']  
 ]', u'o\_\_Coriobacteriales', u'f\_\_Coriobacteriaceae', u'g\_\_Collinsella', u's\_\_stercoris']  
 ]obiae', u'o\_\_Verrucomicrobiales', u'f\_\_Verrucomicrobiaceae', u'g\_\_Akkermansia', u's\_\_muciniphila']  
 ]', u'o\_\_Bifidobacteriales', u'f\_\_Bifidobacteriaceae', u'g\_\_Bifidobacterium']  
 ]acteria', u'o\_\_Burkholderiales', u'f\_\_Alcaligenaceae', u'g\_\_Sutterella', u's\_\_']  
 ]bacteria', u'o\_\_Enterobacteriales', u'f\_\_Enterobacteriaceae', u'g\_\_Providencia', u's\_\_']  
 :lostridiales', u'f\_\_Veillonellaceae', u'g\_\_Veillonella', u's\_\_']  
 ]bacillales', u'f\_\_Streptococcaceae', u'g\_\_Streptococcus', u's\_\_']  
 lales']  
 ]o\_\_Bacteroidales', u'f\_\_Porphyromonadaceae', u'g\_\_Parabacteroides', u's\_\_distasonis']  
 :lostridiales', u'f\_\_Clostridiaceae', u'g\_\_', u's\_\_']  
 ]bacillales', u'f\_\_Streptococcaceae', u'g\_\_Streptococcus', u's\_\_']  
 ]acteria', u'o\_\_Rhodobacterales', u'f\_\_Rhodobacteraceae', u'g\_\_Paracoccus', u's\_\_aminovorans']  
 ]bacillales', u'f\_\_Streptococcaceae', u'g\_\_Streptococcus', u's\_\_']  
  
 ]bacillales', u'f\_\_Streptococcaceae', u'g\_\_Streptococcus', u's\_\_']  
 ]bacillales', u'f\_\_Streptococcaceae', u'g\_\_Streptococcus', u's\_\_']  
 ]bacteria', u'o\_\_Enterobacteriales', u'f\_\_Enterobacteriaceae', u'g\_\_', u's\_\_']  
 ]bacteria', u'o\_\_Enterobacteriales', u'f\_\_Enterobacteriaceae', u'g\_\_', u's\_\_']  
 ]bacteria', u'o\_\_Enterobacteriales', u'f\_\_Enterobacteriaceae', u'g\_\_Proteus', u's\_\_']  
 ]acteria', u'o\_\_Neisseriales', u'f\_\_Neisseriaceae', u'g\_\_', u's\_\_']  
 ]bacteria', u'o\_\_Enterobacteriales', u'f\_\_Enterobacteriaceae', u'g\_\_', u's\_\_']  
 ]', u'o\_\_Bifidobacteriales', u'f\_\_Bifidobacteriaceae', u'g\_\_Bifidobacterium', u's\_\_']  
 ]bacillales']  
 ]o\_\_Bacteroidales', u'f\_\_Bacteroidaceae', u'g\_\_Bacteroides', u's\_\_']  
 ]o\_\_Bacteroidales', u'f\_\_Bacteroidaceae', u'g\_\_Bacteroides', u's\_\_fragilis']  
 ]bacillales', u'f\_\_Lactobacillaceae', u'g\_\_Lactobacillus', u's\_\_zeae']

:lostridiales', u'f\_\_Ruminococcaceae', u'g\_\_Faecalibacterium', u's\_\_prausnitzii']  
 >bacillales', u'f\_\_Streptococcaceae', u'g\_\_Streptococcus', u's\_\_']  
 >bacillales', u'f\_\_Streptococcaceae', u'g\_\_Streptococcus', u's\_\_']  
 >bacillales', u'f\_\_Streptococcaceae', u'g\_\_Streptococcus', u's\_\_']  
 >bacillales', u'f\_\_Streptococcaceae', u'g\_\_Streptococcus', u's\_\_']  
 >bacillales', u'f\_\_Enterococcaceae']  
 'o\_\_Bacteroidales', u'f\_\_Porphyromonadaceae', u'g\_\_Parabacteroides', u's\_\_distasonis']  
 :lostridiales', u'f\_\_Clostridiaceae', u'g\_\_', u's\_\_']  
 cteria', u'o\_\_Burkholderiales', u'f\_\_Comamonadaceae', u'g\_\_', u's\_\_']  
 t', u'o\_\_Actinomycetales', u'f\_\_Corynebacteriaceae', u'g\_\_Corynebacterium', u's\_\_']  
 'obiae', u'o\_\_Verrucomicrobiales', u'f\_\_Verrucomicrobiaceae', u'g\_\_Akkermansia', u's\_\_muciniphila']  
 ellales', u'f\_\_Gemellaceae', u'g\_\_', u's\_\_']  
 :lostridiales', u'f\_\_Lachnospiraceae', u'g\_\_Coprococcus', u's\_\_']  
 :lostridiales', u'f\_\_Lachnospiraceae', u'g\_\_[Ruminococcus]', u's\_\_gnavus']  
  
 'o\_\_Bacteroidales', u'f\_\_Porphyromonadaceae', u'g\_\_Parabacteroides', u's\_\_distasonis']  
 >bacillales', u'f\_\_Streptococcaceae', u'g\_\_Streptococcus', u's\_\_']  
 >bacteria', u'o\_\_Enterobacteriales', u'f\_\_Enterobacteriaceae', u'g\_\_', u's\_\_']  
 :lostridiales', u'f\_\_Clostridiaceae', u'g\_\_', u's\_\_']  
 >bacteria', u'o\_\_Enterobacteriales', u'f\_\_Enterobacteriaceae', u'g\_\_', u's\_\_']  
 >bacteria', u'o\_\_Enterobacteriales', u'f\_\_Enterobacteriaceae', u'g\_\_', u's\_\_']  
 t', u'o\_\_Actinomycetales', u'f\_\_Corynebacteriaceae', u'g\_\_Corynebacterium', u's\_\_']  
 >bacteria', u'o\_\_Pasteurellales', u'f\_\_Pasteurellaceae', u'g\_\_Haemophilus', u's\_\_']  
  
 lales', u'f\_\_Staphylococcaceae', u'g\_\_Staphylococcus', u's\_\_aureus']  
 >bacillales', u'f\_\_Lactobacillaceae', u'g\_\_Lactobacillus', u's\_\_iners']  
 >bacillales', u'f\_\_Streptococcaceae', u'g\_\_Streptococcus', u's\_\_']  
 :lostridiales', u'f\_\_Lachnospiraceae', u'g\_\_Dorea', u's\_\_']  
 :lostridiales', u'f\_\_Lachnospiraceae', u'g\_\_Coprococcus', u's\_\_']  
 >bacillales', u'f\_\_Streptococcaceae', u'g\_\_Streptococcus', u's\_\_']  
 'o\_\_Bacteroidales', u'f\_\_Bacteroidaceae', u'g\_\_Bacteroides', u's\_\_fragilis']  
 >bacillales', u'f\_\_Streptococcaceae', u'g\_\_Streptococcus', u's\_\_']  
 t', u'o\_\_Actinomycetales', u'f\_\_Corynebacteriaceae', u'g\_\_Corynebacterium', u's\_\_']  
 :lostridiales', u'f\_\_Lachnospiraceae', u'g\_\_', u's\_\_']  
 :lostridiales', u'f\_\_Clostridiaceae', u'g\_\_Clostridium']  
 :lostridiales', u'f\_\_Lachnospiraceae']  
 >bacillales', u'f\_\_Streptococcaceae', u'g\_\_Streptococcus', u's\_\_']  
 >bacillales', u'f\_\_Streptococcaceae', u'g\_\_Streptococcus', u's\_\_']  
 t', u'o\_\_Actinomycetales', u'f\_\_Corynebacteriaceae', u'g\_\_Corynebacterium', u's\_\_']  
 'o\_\_Bacteroidales', u'f\_\_Bacteroidaceae', u'g\_\_Bacteroides', u's\_\_']  
 :lostridiales', u'f\_\_Lachnospiraceae', u'g\_\_Coprococcus', u's\_\_']  
 >bacteria', u'o\_\_Enterobacteriales', u'f\_\_Enterobacteriaceae', u'g\_\_', u's\_\_']  
 :lostridiales', u'f\_\_Lachnospiraceae']  
 :lostridiales', u'f\_\_Veillonellaceae', u'g\_\_Veillonella', u's\_\_']  
 >bacillales', u'f\_\_Aerococcaceae', u'g\_\_Alloiococcus', u's\_\_']  
 >bacillales', u'f\_\_Streptococcaceae', u'g\_\_Streptococcus', u's\_\_']  
 t', u'o\_\_Bifidobacteriales', u'f\_\_Bifidobacteriaceae', u'g\_\_Bifidobacterium', u's\_\_']  
 :lostridiales', u'f\_\_Lachnospiraceae', u'g\_\_[Ruminococcus]', u's\_\_gnavus']  
 :lostridiales', u'f\_\_Clostridiaceae']  
 :lostridiales', u'f\_\_Lachnospiraceae', u'g\_\_', u's\_\_']  
 >bacteria', u'o\_\_Enterobacteriales', u'f\_\_Enterobacteriaceae', u'g\_\_', u's\_\_']  
 cteria', u'o\_\_Burkholderiales', u'f\_\_Comamonadaceae', u'g\_\_', u's\_\_']  
 :lostridiales', u'f\_\_Clostridiaceae', u'g\_\_Clostridium']  
 :lostridiales', u'f\_\_Lachnospiraceae', u'g\_\_', u's\_\_']  
 >bacillales', u'f\_\_Enterococcaceae', u'g\_\_Enterococcus']  
 :lostridiales', u'f\_\_Lachnospiraceae', u'g\_\_[Ruminococcus]', u's\_\_']

>bacillales', u'f\_\_Lactobacillaceae', u'g\_\_Lactobacillus', u's\_\_']  
 >bacillales', u'f\_\_Streptococcaceae', u'g\_\_Streptococcus', u's\_\_']  
 >bacillales', u'f\_\_Streptococcaceae', u'g\_\_Streptococcus', u's\_\_']  
 >bacillales', u'f\_\_Streptococcaceae', u'g\_\_Streptococcus']  
 :lostridiales', u'f\_\_Veillonellaceae', u'g\_\_Veillonella', u's\_\_']  
 'o\_\_Bacteroidales', u'f\_\_Porphyromonadaceae', u'g\_\_Parabacteroides', u's\_\_distasonis']  
 lales', u'f\_\_Staphylococcaceae', u'g\_\_Staphylococcus', u's\_\_']  
 >bacillales', u'f\_\_Streptococcaceae', u'g\_\_Streptococcus', u's\_\_']  
 >bacillales', u'f\_\_Streptococcaceae', u'g\_\_Streptococcus', u's\_\_']  
 >bacillales', u'f\_\_Streptococcaceae', u'g\_\_Streptococcus', u's\_\_']  
 >bacteria', u'o\_\_Pseudomonadales', u'f\_\_Moraxellaceae', u'g\_\_Moraxella', u's\_\_']  
 >bacteria', u'o\_\_Enterobacteriales', u'f\_\_Enterobacteriaceae', u'g\_\_', u's\_\_']  
 :lostridiales', u'f\_\_Clostridiaceae', u'g\_\_', u's\_\_']  
 >bacillales', u'f\_\_Streptococcaceae', u'g\_\_Streptococcus', u's\_\_']  
 >bacillales', u'f\_\_Enterococcaceae', u'g\_\_Enterococcus']  
 i', u'o\_\_Actinomycetales', u'f\_\_Micrococcaceae', u'g\_\_Rothia', u's\_\_mucilaginoso']  
 >bacillales', u'f\_\_Streptococcaceae', u'g\_\_Streptococcus', u's\_\_']  
 >bacteria', u'o\_\_Enterobacteriales', u'f\_\_Enterobacteriaceae', u'g\_\_Citrobacter', u's\_\_']  
 i', u'o\_\_Actinomycetales', u'f\_\_Corynebacteriaceae', u'g\_\_Corynebacterium', u's\_\_']  
 :lostridiales', u'f\_\_Lachnospiraceae', u'g\_\_Coprococcus', u's\_\_']  
 i', u'o\_\_Actinomycetales', u'f\_\_Corynebacteriaceae', u'g\_\_Corynebacterium', u's\_\_']  
 >bacteria', u'o\_\_Enterobacteriales', u'f\_\_Enterobacteriaceae', u'g\_\_', u's\_\_']  
 >bacteria', u'o\_\_Enterobacteriales', u'f\_\_Enterobacteriaceae', u'g\_\_', u's\_\_']  
 >bacteria', u'o\_\_Xanthomonadales', u'f\_\_Xanthomonadaceae', u'g\_\_', u's\_\_']  
 :lostridiales', u'f\_\_Veillonellaceae', u'g\_\_Megamonas', u's\_\_']  
 'o\_\_Bacteroidales', u'f\_\_Bacteroidaceae', u'g\_\_Bacteroides', u's\_\_']  
 >bacillales', u'f\_\_Streptococcaceae', u'g\_\_Streptococcus', u's\_\_']  
 >bacillales', u'f\_\_Streptococcaceae', u'g\_\_Streptococcus', u's\_\_']  
 >bacteria', u'o\_\_Pasteurellales', u'f\_\_Pasteurellaceae', u'g\_\_Haemophilus', u's\_\_']  
 :lostridiales', u'f\_\_Veillonellaceae', u'g\_\_Veillonella', u's\_\_dispar']  
 >bacillales', u'f\_\_Streptococcaceae', u'g\_\_Streptococcus', u's\_\_']  
 :lostridiales', u'f\_\_Veillonellaceae', u'g\_\_Veillonella', u's\_\_']  
 >bacillales', u'f\_\_Streptococcaceae', u'g\_\_Streptococcus', u's\_\_']  
 :lostridiales', u'f\_\_Veillonellaceae', u'g\_\_Veillonella', u's\_\_dispar']  
 i', u'o\_\_Actinomycetales', u'f\_\_Corynebacteriaceae', u'g\_\_Corynebacterium', u's\_\_']  
 :lostridiales', u'f\_\_Clostridiaceae', u'g\_\_', u's\_\_']  
 ', u'o\_\_Coriobacteriales', u'f\_\_Coriobacteriaceae', u'g\_\_Collinsella', u's\_\_aerofaciens']  
 'o\_\_Bacteroidales', u'f\_\_Bacteroidaceae', u'g\_\_Bacteroides', u's\_\_']  
 cteria', u'o\_\_Burkholderiales', u'f\_\_', u'g\_\_', u's\_\_']  
 >bacillales', u'f\_\_Streptococcaceae', u'g\_\_Streptococcus', u's\_\_']  
 >bacteria', u'o\_\_Pseudomonadales', u'f\_\_Moraxellaceae', u'g\_\_Moraxella', u's\_\_']  
 >bacteria', u'o\_\_Enterobacteriales', u'f\_\_Enterobacteriaceae', u'g\_\_', u's\_\_']  
 >bacillales', u'f\_\_Carnobacteriaceae', u'g\_\_Granulicatella', u's\_\_']  
 >bacteria', u'o\_\_Enterobacteriales', u'f\_\_Enterobacteriaceae', u'g\_\_', u's\_\_']  
 :lostridiales', u'f\_\_Lachnospiraceae', u'g\_\_Blautia', u's\_\_']  
 'o\_\_Bacteroidales', u'f\_\_Bacteroidaceae', u'g\_\_Bacteroides', u's\_\_']  
 'o\_\_Bacteroidales', u'f\_\_Prevotellaceae', u'g\_\_Prevotella', u's\_\_']  
 >bacillales', u'f\_\_Aerococcaceae', u'g\_\_Alloiococcus', u's\_\_']  
 >bacillales', u'f\_\_Lactobacillaceae', u'g\_\_Lactobacillus', u's\_\_zeae']  
 >bacteria', u'o\_\_Enterobacteriales', u'f\_\_Enterobacteriaceae', u'g\_\_', u's\_\_']  
 i', u'o\_\_Bifidobacteriales', u'f\_\_Bifidobacteriaceae', u'g\_\_Bifidobacterium', u's\_\_']  
 >bacteria', u'o\_\_Enterobacteriales', u'f\_\_Enterobacteriaceae', u'g\_\_', u's\_\_']  
 , u'g\_\_', u's\_\_']  
 'o\_\_Bacteroidales', u'f\_\_Porphyromonadaceae', u'g\_\_Parabacteroides', u's\_\_distasonis']  
 'o\_\_Bacteroidales', u'f\_\_Bacteroidaceae', u'g\_\_Bacteroides', u's\_\_']  
 >bacillales', u'f\_\_Streptococcaceae', u'g\_\_Streptococcus', u's\_\_']

:lostridiales', u'f\_\_Lachnospiraceae', u'g\_\_', u's\_\_']  
 cteria', u'o\_\_Neisseriales', u'f\_\_Neisseriaceae', u'g\_\_', u's\_\_']  
 acteria', u'o\_\_Sphingomonadales', u'f\_\_Sphingomonadaceae', u'g\_\_Novosphingobium', u's\_\_']  
 i', u'o\_\_Actinomycetales', u'f\_\_Corynebacteriaceae', u'g\_\_Corynebacterium', u's\_\_']  
 lales', u'f\_\_Staphylococcaceae', u'g\_\_Staphylococcus', u's\_\_aureus']  
 >bacteria', u'o\_\_Enterobacteriales', u'f\_\_Enterobacteriaceae', u'g\_\_', u's\_\_']  
 >bacillales', u'f\_\_Streptococcaceae', u'g\_\_Streptococcus', u's\_\_']  
 >bacteria', u'o\_\_Enterobacteriales', u'f\_\_Enterobacteriaceae', u'g\_\_', u's\_\_']  
 ', u'o\_\_Coriobacteriales', u'f\_\_Coriobacteriaceae', u'g\_\_Collinsella', u's\_\_aerofaciens']  
 acteria', u'o\_\_Rhizobiales', u'f\_\_Bradyrhizobiaceae', u'g\_\_', u's\_\_']  
 :lostridiales', u'f\_\_Clostridiaceae', u'g\_\_Clostridium', u's\_\_butyricum']  
 i', u'o\_\_Actinomycetales', u'f\_\_Corynebacteriaceae', u'g\_\_Corynebacterium', u's\_\_']  
 >bacteria', u'o\_\_Pseudomonadales', u'f\_\_Moraxellaceae', u'g\_\_Moraxella', u's\_\_']  
 i', u'o\_\_Actinomycetales', u'f\_\_Corynebacteriaceae', u'g\_\_Corynebacterium', u's\_\_']  
 'o\_\_Bacteroidales', u'f\_\_Bacteroidaceae', u'g\_\_Bacteroides', u's\_\_ovatus']  
 :lostridiales', u'f\_\_Clostridiaceae', u'g\_\_Clostridium', u's\_\_neonatale']  
 >bacillales', u'f\_\_Streptococcaceae', u'g\_\_Streptococcus', u's\_\_']  
 >bacillales', u'f\_\_Streptococcaceae', u'g\_\_Streptococcus', u's\_\_']  
 >bacillales', u'f\_\_Streptococcaceae', u'g\_\_Streptococcus', u's\_\_']  
 cteria', u'o\_\_Burkholderiales', u'f\_\_Comamonadaceae', u'g\_\_', u's\_\_']  
 >bacillales', u'f\_\_Aerococcaceae', u'g\_\_Alloiococcus', u's\_\_']  
 cteria', u'o\_\_Neisseriales', u'f\_\_Neisseriaceae', u'g\_\_', u's\_\_']  
 >bacillales', u'f\_\_Streptococcaceae', u'g\_\_Streptococcus', u's\_\_']  
 :lostridiales', u'f\_\_Lachnospiraceae', u'g\_\_Coprococcus', u's\_\_']  
 >bacteria', u'o\_\_Enterobacteriales', u'f\_\_Enterobacteriaceae', u'g\_\_', u's\_\_']  
 >bacillales', u'f\_\_Streptococcaceae', u'g\_\_Streptococcus', u's\_\_infantis']  
 lales', u'f\_\_Staphylococcaceae', u'g\_\_Staphylococcus', u's\_\_aureus']  
 :lostridiales', u'f\_\_Lachnospiraceae', u'g\_\_[Ruminococcus]', u's\_\_']  
 >bacteria', u'o\_\_Enterobacteriales', u'f\_\_Enterobacteriaceae', u'g\_\_Providencia', u's\_\_']  
 i', u'o\_\_Bifidobacteriales', u'f\_\_Bifidobacteriaceae', u'g\_\_Bifidobacterium']  
 >bacillales']  
 >bacteria', u'o\_\_Enterobacteriales', u'f\_\_Enterobacteriaceae', u'g\_\_', u's\_\_']  
 'obiae', u'o\_\_Verrucomicrobiales', u'f\_\_Verrucomicrobiaceae', u'g\_\_Akkermansia', u's\_\_muciniphila']  
 >bacillales', u'f\_\_Streptococcaceae', u'g\_\_Streptococcus', u's\_\_']  
 >bacteria', u'o\_\_Pseudomonadales', u'f\_\_Moraxellaceae', u'g\_\_', u's\_\_']  
 >bacillales', u'f\_\_Streptococcaceae', u'g\_\_Streptococcus', u's\_\_']  
 >bacillales', u'f\_\_Streptococcaceae', u'g\_\_Streptococcus', u's\_\_']  
 i', u'o\_\_Bifidobacteriales', u'f\_\_Bifidobacteriaceae', u'g\_\_Bifidobacterium']  
 'o\_\_Bacteroidales', u'f\_\_Porphyromonadaceae', u'g\_\_Parabacteroides', u's\_\_distasonis']  
 >bacillales', u'f\_\_Aerococcaceae', u'g\_\_Alloiococcus', u's\_\_']  
 lales', u'f\_\_Staphylococcaceae', u'g\_\_Staphylococcus', u's\_\_']  
 'o\_\_Bacteroidales', u'f\_\_Porphyromonadaceae', u'g\_\_Parabacteroides', u's\_\_distasonis']  
 :lostridiales', u'f\_\_Lachnospiraceae', u'g\_\_Blautia', u's\_\_']  
 'o\_\_Bacteroidales', u'f\_\_Bacteroidaceae', u'g\_\_Bacteroides', u's\_\_']  
 >bacillales', u'f\_\_Streptococcaceae', u'g\_\_Streptococcus', u's\_\_']  
 >bacillales', u'f\_\_Enterococcaceae', u'g\_\_Enterococcus', u's\_\_']  
 :lostridiales', u'f\_\_Lachnospiraceae', u'g\_\_[Ruminococcus]', u's\_\_']  
 ellales', u'f\_\_Gemellaceae', u'g\_\_', u's\_\_']  
 lales', u'f\_\_Staphylococcaceae', u'g\_\_Staphylococcus', u's\_\_epidermidis']  
 lales', u'f\_\_Staphylococcaceae', u'g\_\_Staphylococcus', u's\_\_']  
 >bacillales', u'f\_\_Streptococcaceae', u'g\_\_Streptococcus', u's\_\_']  
 :lostridiales', u'f\_\_Peptostreptococcaceae', u'g\_\_', u's\_\_']  
 'o\_\_Bacteroidales', u'f\_\_Porphyromonadaceae', u'g\_\_Parabacteroides', u's\_\_distasonis']  
 :lostridiales', u'f\_\_Clostridiaceae', u'g\_\_', u's\_\_']  
 'o\_\_Bacteroidales', u'f\_\_Bacteroidaceae', u'g\_\_Bacteroides', u's\_\_']  
 >bacillales', u'f\_\_Streptococcaceae', u'g\_\_Streptococcus', u's\_\_']

:lostridiales', u'f\_\_Clostridiaceae', u'g\_\_', u's\_\_']  
 i', u'o\_\_Bifidobacteriales', u'f\_\_Bifidobacteriaceae', u'g\_\_Bifidobacterium', u's\_\_']  
 i', u'o\_\_Actinomycetales', u'f\_\_Corynebacteriaceae', u'g\_\_Corynebacterium', u's\_\_']  
 >bacillales', u'f\_\_Lactobacillaceae', u'g\_\_Lactobacillus', u's\_\_zeae']  
 cteria', u'o\_\_Burkholderiales', u'f\_\_Comamonadaceae', u'g\_\_', u's\_\_']  
 :lostridiales', u'f\_\_Veillonellaceae', u'g\_\_Veillonella', u's\_\_dispar']  
 i', u'o\_\_Actinomycetales', u'f\_\_Actinomycetaceae', u'g\_\_Actinomyces', u's\_\_']  
 i', u'o\_\_Actinomycetales', u'f\_\_Corynebacteriaceae', u'g\_\_Corynebacterium', u's\_\_']  
 >bacillales', u'f\_\_Streptococcaceae', u'g\_\_Streptococcus', u's\_\_']  
 >bacteria', u'o\_\_Enterobacteriales', u'f\_\_Enterobacteriaceae', u'g\_\_', u's\_\_']  
 i', u'o\_\_Bifidobacteriales', u'f\_\_Bifidobacteriaceae', u'g\_\_Bifidobacterium', u's\_\_']  
 >bacillales', u'f\_\_Streptococcaceae', u'g\_\_Streptococcus', u's\_\_']  
 >bacillales', u'f\_\_Aerococcaceae', u'g\_\_Alloiococcus', u's\_\_']  
 >bacillales', u'f\_\_Streptococcaceae', u'g\_\_Streptococcus', u's\_\_']  
 >bacteria', u'o\_\_Enterobacteriales', u'f\_\_Enterobacteriaceae', u'g\_\_', u's\_\_']  
 cteria', u'o\_\_Neisseriales', u'f\_\_Neisseriaceae', u'g\_\_', u's\_\_']  
 lales', u'f\_\_Staphylococcaceae', u'g\_\_Staphylococcus']  
 cteria', u'o\_\_Burkholderiales', u'f\_\_Alcaligenaceae', u'g\_\_Sutterella', u's\_\_']  
 i', u'o\_\_Bifidobacteriales', u'f\_\_Bifidobacteriaceae', u'g\_\_Bifidobacterium']  
 i', u'o\_\_Actinomycetales', u'f\_\_Corynebacteriaceae', u'g\_\_Corynebacterium', u's\_\_']  
 >bacillales', u'f\_\_Streptococcaceae', u'g\_\_Streptococcus', u's\_\_']  
 cteria', u'o\_\_Burkholderiales', u'f\_\_Oxalobacteraceae', u'g\_\_', u's\_\_']  
 :lostridiales', u'f\_\_Veillonellaceae', u'g\_\_Megasphaera', u's\_\_']  
 acteria', u'o\_\_Rhodospirillales', u'f\_\_Rhodospirillaceae', u'g\_\_', u's\_\_']  
 cteria', u'o\_\_Burkholderiales', u'f\_\_Comamonadaceae', u'g\_\_', u's\_\_']  
 i', u'o\_\_Actinomycetales', u'f\_\_Corynebacteriaceae', u'g\_\_Corynebacterium', u's\_\_']  
 >bacteria', u'o\_\_Enterobacteriales', u'f\_\_Enterobacteriaceae', u'g\_\_', u's\_\_']  
 >bacteria', u'o\_\_Enterobacteriales', u'f\_\_Enterobacteriaceae', u'g\_\_', u's\_\_']  
 >bacillales', u'f\_\_Enterococcaceae']  
 >bacillales', u'f\_\_Enterococcaceae', u'g\_\_Enterococcus', u's\_\_']  
 'o\_\_Bacteroidales', u'f\_\_Bacteroidaceae', u'g\_\_Bacteroides', u's\_\_']  
 >bacillales', u'f\_\_Streptococcaceae', u'g\_\_Streptococcus', u's\_\_']  
 >bacteria']  
 i', u'o\_\_Actinomycetales', u'f\_\_Corynebacteriaceae', u'g\_\_Corynebacterium', u's\_\_']  
 :lostridiales', u'f\_\_Peptostreptococcaceae', u'g\_\_', u's\_\_']  
 cteria', u'o\_\_Burkholderiales', u'f\_\_Oxalobacteraceae', u'g\_\_', u's\_\_']  
 >bacillales', u'f\_\_Streptococcaceae', u'g\_\_Streptococcus', u's\_\_']  
 i', u'o\_\_Bifidobacteriales', u'f\_\_Bifidobacteriaceae', u'g\_\_Bifidobacterium']  
 lales', u'f\_\_Staphylococcaceae', u'g\_\_Staphylococcus', u's\_\_']  
 'o\_\_Bacteroidales', u'f\_\_Bacteroidaceae', u'g\_\_Bacteroides', u's\_\_']  
 lales', u'f\_\_Staphylococcaceae', u'g\_\_Staphylococcus', u's\_\_']  
 cteria', u'o\_\_Burkholderiales', u'f\_\_Alcaligenaceae', u'g\_\_Sutterella', u's\_\_']  
 'o\_\_Bacteroidales', u'f\_\_Bacteroidaceae', u'g\_\_Bacteroides', u's\_\_fragilis']  
 'o\_\_Bacteroidales', u'f\_\_Porphyromonadaceae', u'g\_\_Parabacteroides', u's\_\_distasonis']  
 i', u'o\_\_Actinomycetales', u'f\_\_Corynebacteriaceae', u'g\_\_Corynebacterium', u's\_\_']  
 >bacteria', u'o\_\_Enterobacteriales', u'f\_\_Enterobacteriaceae', u'g\_\_', u's\_\_']  
 lales', u'f\_\_Staphylococcaceae', u'g\_\_Staphylococcus', u's\_\_']  
 :lostridiales', u'f\_\_Lachnospiraceae', u'g\_\_[Ruminococcus]', u's\_\_gnavus']  
 >bacillales', u'f\_\_Streptococcaceae', u'g\_\_Streptococcus', u's\_\_']  
 :lostridiales', u'f\_\_Veillonellaceae', u'g\_\_Veillonella', u's\_\_']  
 'o\_\_Bacteroidales', u'f\_\_Bacteroidaceae', u'g\_\_Bacteroides', u's\_\_']  
 >bacteria', u'o\_\_Pseudomonadales', u'f\_\_Moraxellaceae', u'g\_\_Moraxella', u's\_\_']  
 ellales', u'f\_\_Gemellaceae', u'g\_\_', u's\_\_']  
 :lostridiales', u'f\_\_Lachnospiraceae', u'g\_\_', u's\_\_']  
 'o\_\_Bacteroidales', u'f\_\_Prevotellaceae', u'g\_\_Prevotella', u's\_\_']  
 >bacteria', u'o\_\_Pseudomonadales', u'f\_\_Pseudomonadaceae', u'g\_\_Pseudomonas', u's\_\_']

]bacillales', u'f\_\_Aerococcaceae', u'g\_\_Alloiococcus', u's\_\_']  
 ]bacteria', u'o\_\_Enterobacteriales', u'f\_\_Enterobacteriaceae', u'g\_\_', u's\_\_']  
 ]lostridiales', u'f\_\_Veillonellaceae', u'g\_\_Megasphaera', u's\_\_']  
 ]lostridiales', u'f\_\_Clostridiaceae', u'g\_\_Clostridium', u's\_\_neonatale']  
 ]bacteria', u'o\_\_Enterobacteriales', u'f\_\_Enterobacteriaceae', u'g\_\_', u's\_\_']  
 ]lostridiales']  
 ]acteria', u'o\_\_Rhizobiales', u'f\_\_Phyllobacteriaceae', u'g\_\_Phyllobacterium', u's\_\_']  
 ]', u'o\_\_Actinomycetales', u'f\_\_Corynebacteriaceae', u'g\_\_Corynebacterium', u's\_\_']  
 ]lostridiales', u'f\_\_Lachnospiraceae', u'g\_\_Coproccoccus', u's\_\_']  
 ]lostridiales', u'f\_\_Clostridiaceae', u'g\_\_', u's\_\_']

]bacillales', u'f\_\_Streptococcaceae', u'g\_\_Streptococcus', u's\_\_']  
 ]o\_\_Bacteroidales', u'f\_\_Bacteroidaceae', u'g\_\_Bacteroides', u's\_\_']  
 ]bacillales', u'f\_\_Aerococcaceae', u'g\_\_Alloiococcus', u's\_\_']  
 ]bacillales', u'f\_\_Streptococcaceae', u'g\_\_Streptococcus', u's\_\_']  
 ]bacillales', u'f\_\_Aerococcaceae', u'g\_\_Alloiococcus', u's\_\_']  
 ]lostridiales', u'f\_\_Lachnospiraceae', u'g\_\_', u's\_\_']  
 ]', u'o\_\_Actinomycetales', u'f\_\_Corynebacteriaceae', u'g\_\_Corynebacterium', u's\_\_']  
 ]bacillales', u'f\_\_Enterococcaceae', u'g\_\_Enterococcus', u's\_\_']  
 ]bacteria', u'o\_\_Enterobacteriales', u'f\_\_Enterobacteriaceae', u'g\_\_', u's\_\_']  
 ]bacteria', u'o\_\_Pasteurellales', u'f\_\_Pasteurellaceae', u'g\_\_Haemophilus']  
 ]bacteria', u'o\_\_Enterobacteriales', u'f\_\_Enterobacteriaceae', u'g\_\_', u's\_\_']  
 ]lostridiales', u'f\_\_Clostridiaceae', u'g\_\_', u's\_\_']  
 ]o\_\_Bacteroidales', u'f\_\_Porphyromonadaceae', u'g\_\_Parabacteroides', u's\_\_distasonis']  
 ]lostridiales', u'f\_\_Lachnospiraceae', u'g\_\_', u's\_\_']  
 ]bacteria', u'o\_\_Pasteurellales', u'f\_\_Pasteurellaceae', u'g\_\_Haemophilus', u's\_\_']  
 ]bacillales', u'f\_\_Aerococcaceae', u'g\_\_Alloiococcus', u's\_\_']  
 ]bacillales', u'f\_\_Streptococcaceae', u'g\_\_Streptococcus', u's\_\_']  
 ]lostridiales', u'f\_\_Veillonellaceae', u'g\_\_Veillonella', u's\_\_dispar']  
 ]lostridiales', u'f\_\_Lachnospiraceae', u'g\_\_Dorea', u's\_\_']  
 ]', u'o\_\_Actinomycetales', u'f\_\_Corynebacteriaceae', u'g\_\_Corynebacterium', u's\_\_']  
 ]lales', u'f\_\_Staphylococcaceae', u'g\_\_Staphylococcus', u's\_\_']  
 ]bacillales', u'f\_\_Aerococcaceae', u'g\_\_Alloiococcus', u's\_\_']  
 ]lostridiales', u'f\_\_Veillonellaceae', u'g\_\_Veillonella', u's\_\_parvula']  
 ]o\_\_Bacteroidales', u'f\_\_Bacteroidaceae', u'g\_\_Bacteroides', u's\_\_']  
 ]lostridiales', u'f\_\_Veillonellaceae', u'g\_\_Megasphaera', u's\_\_']  
 ]bacteria', u'o\_\_Enterobacteriales', u'f\_\_Enterobacteriaceae', u'g\_\_', u's\_\_']  
 ]bacillales', u'f\_\_Streptococcaceae', u'g\_\_Streptococcus', u's\_\_']  
 ]bacteria', u'o\_\_Enterobacteriales', u'f\_\_Enterobacteriaceae', u'g\_\_', u's\_\_']  
 ]acteria', u'o\_\_Burkholderiales', u'f\_\_Alcaligenaceae', u'g\_\_Sutterella', u's\_\_']  
 ]lostridiales', u'f\_\_Veillonellaceae', u'g\_\_Veillonella', u's\_\_']  
 ]bacteria', u'o\_\_Pasteurellales', u'f\_\_Pasteurellaceae', u'g\_\_Haemophilus', u's\_\_influenzae']  
 ]obiae', u'o\_\_Verrucomicrobiales', u'f\_\_Verrucomicrobiaceae', u'g\_\_Akkermansia', u's\_\_muciniphila']  
 ]', u'o\_\_Actinomycetales', u'f\_\_Corynebacteriaceae', u'g\_\_Corynebacterium', u's\_\_']  
 ]bacillales', u'f\_\_Streptococcaceae', u'g\_\_Streptococcus', u's\_\_']  
 ]lostridiales', u'f\_\_Veillonellaceae', u'g\_\_Veillonella', u's\_\_parvula']  
 ]acteria', u'o\_\_Burkholderiales', u'f\_\_Comamonadaceae']  
 ]bacillales', u'f\_\_Streptococcaceae', u'g\_\_Streptococcus', u's\_\_']  
 ]lostridiales', u'f\_\_Lachnospiraceae', u'g\_\_Dorea', u's\_\_']  
 ]bacillales', u'f\_\_Streptococcaceae', u'g\_\_Streptococcus', u's\_\_']  
 ]bacillales', u'f\_\_Enterococcaceae', u'g\_\_Vagococcus', u's\_\_']  
 ]lostridiales', u'f\_\_Lachnospiraceae', u'g\_\_Blautia', u's\_\_producta']  
 ]lostridiales', u'f\_\_Lachnospiraceae', u'g\_\_[Ruminococcus]', u's\_\_gnavus']  
 ]lostridiales', u'f\_\_Clostridiaceae', u'g\_\_', u's\_\_']  
 ]bacteria', u'o\_\_Enterobacteriales', u'f\_\_Enterobacteriaceae', u'g\_\_', u's\_\_']  
 ]lostridiales', u'f\_\_Lachnospiraceae', u'g\_\_', u's\_\_']

'o\_\_Bacteroidales', u'f\_\_Bacteroidaceae', u'g\_\_Bacteroides', u's\_\_']  
>bacillales', u'o\_\_Enterobacteriales', u'f\_\_Enterobacteriaceae', u'g\_\_', u's\_\_']  
>bacillales', u'f\_\_Aerococcaceae', u'g\_\_Alloiococcus', u's\_\_']  
>bacillales', u'f\_\_Streptococcaceae', u'g\_\_Streptococcus', u's\_\_']  
:lostridiales', u'f\_\_Lachnospiraceae', u'g\_\_Dorea', u's\_\_']  
>bacillales', u'f\_\_Aerococcaceae', u'g\_\_Alloiococcus', u's\_\_']  
>bacillales', u'f\_\_Streptococcaceae', u'g\_\_Streptococcus', u's\_\_']  
>bacillales', u'f\_\_Streptococcaceae', u'g\_\_Streptococcus', u's\_\_']  
acteria', u'o\_\_Rhizobiales', u'f\_\_Phyllobacteriaceae']  
>bacillales', u'f\_\_Streptococcaceae', u'g\_\_Streptococcus', u's\_\_']  
  
'o\_\_Bacteroidales', u'f\_\_Bacteroidaceae', u'g\_\_Bacteroides', u's\_\_']  
>bacillales', u'o\_\_Pseudomonadales', u'f\_\_Moraxellaceae', u'g\_\_Moraxella', u's\_\_']  
>bacillales', u'o\_\_Pseudomonadales', u'f\_\_Moraxellaceae', u'g\_\_Acinetobacter', u's\_\_']  
:lostridiales', u'f\_\_Lachnospiraceae', u'g\_\_', u's\_\_']  
>bacillales', u'o\_\_Enterobacteriales', u'f\_\_Enterobacteriaceae', u'g\_\_', u's\_\_']  
>bacillales', u'o\_\_Enterobacteriales', u'f\_\_Enterobacteriaceae', u'g\_\_', u's\_\_']  
:lostridiales', u'f\_\_Clostridiaceae', u'g\_\_', u's\_\_']  
>bacillales', u'f\_\_Streptococcaceae', u'g\_\_Streptococcus', u's\_\_']  
:lostridiales', u'f\_\_Veillonellaceae', u'g\_\_Megasphaera', u's\_\_']  
>bacillales', u'f\_\_Streptococcaceae', u'g\_\_Streptococcus', u's\_\_']  
:lostridiales', u'f\_\_Lachnospiraceae']  
lales', u'f\_\_Staphylococcaceae', u'g\_\_Staphylococcus', u's\_\_']  
>bacillales', u'o\_\_Pasteurellales', u'f\_\_Pasteurellaceae', u'g\_\_Haemophilus', u's\_\_influenzae']  
:lostridiales', u'f\_\_Veillonellaceae', u'g\_\_Veillonella', u's\_\_parvula']  
acteria', u'o\_\_Rhizobiales', u'f\_\_Phyllobacteriaceae', u'g\_\_Phyllobacterium', u's\_\_']  
>bacillales', u'f\_\_Aerococcaceae', u'g\_\_Alloiococcus', u's\_\_']  
>bacillales', u'f\_\_Streptococcaceae', u'g\_\_Lactococcus', u's\_\_']  
ellales', u'f\_\_Gemellaceae', u'g\_\_', u's\_\_']  
>bacillales', u'f\_\_Streptococcaceae', u'g\_\_Streptococcus', u's\_\_']  
acteria', u'o\_\_Burkholderiales', u'f\_\_Comamonadaceae']  
if\_\_', u'g\_\_', u's\_\_']  
>bacillales', u'f\_\_Enterococcaceae', u'g\_\_Enterococcus', u's\_\_']  
>bacillales', u'o\_\_Pseudomonadales', u'f\_\_Pseudomonadaceae', u'g\_\_Pseudomonas', u's\_\_']  
>bacillales', u'f\_\_Aerococcaceae', u'g\_\_Alloiococcus', u's\_\_']  
>bacillales', u'o\_\_Enterobacteriales', u'f\_\_Enterobacteriaceae', u'g\_\_', u's\_\_']  
'o\_\_Bacteroidales', u'f\_\_Porphyromonadaceae', u'g\_\_Parabacteroides', u's\_\_distasonis']  
:lostridiales', u'f\_\_Veillonellaceae', u'g\_\_Veillonella', u's\_\_dispar']  
acteria', u'o\_\_Burkholderiales', u'f\_\_Oxalobacteraceae', u'g\_\_', u's\_\_']  
i', u'o\_\_Bifidobacteriales', u'f\_\_Bifidobacteriaceae', u'g\_\_Bifidobacterium']  
>bacillales', u'o\_\_Enterobacteriales', u'f\_\_Enterobacteriaceae', u'g\_\_', u's\_\_']  
>bacillales', u'o\_\_Enterobacteriales', u'f\_\_Enterobacteriaceae', u'g\_\_Citrobacter', u's\_\_']  
i', u'o\_\_Actinomycetales', u'f\_\_Corynebacteriaceae', u'g\_\_Corynebacterium', u's\_\_']  
>bacillales', u'f\_\_Streptococcaceae', u'g\_\_Streptococcus', u's\_\_']  
acteria', u'o\_\_Burkholderiales', u'f\_\_Comamonadaceae', u'g\_\_', u's\_\_']  
'o\_\_Bacteroidales', u'f\_\_Porphyromonadaceae', u'g\_\_Parabacteroides', u's\_\_distasonis']  
>bacillales', u'f\_\_Streptococcaceae', u'g\_\_Streptococcus', u's\_\_']  
'o\_\_Bacteroidales', u'f\_\_Bacteroidaceae', u'g\_\_Bacteroides', u's\_\_ovatus']  
i', u'o\_\_Bifidobacteriales', u'f\_\_Bifidobacteriaceae', u'g\_\_Bifidobacterium']  
lales', u'f\_\_Staphylococcaceae', u'g\_\_Staphylococcus']  
>bacillales', u'f\_\_Streptococcaceae', u'g\_\_Streptococcus', u's\_\_']  
>bacillales', u'o\_\_Enterobacteriales', u'f\_\_Enterobacteriaceae', u'g\_\_', u's\_\_']  
>bacillales', u'f\_\_Streptococcaceae', u'g\_\_Streptococcus', u's\_\_']  
>bacillales', u'o\_\_Pasteurellales', u'f\_\_Pasteurellaceae', u'g\_\_Haemophilus', u's\_\_']  
'o\_\_Bacteroidales', u'f\_\_Bacteroidaceae', u'g\_\_Bacteroides', u's\_\_']  
acteria', u'o\_\_Neisseriales', u'f\_\_Neisseriaceae', u'g\_\_', u's\_\_']



:lostridiales', u'f\_\_Veillonellaceae', u'g\_\_Veillonella', u's\_\_']  
 >bacillales', u'f\_\_Streptococcaceae', u'g\_\_Streptococcus', u's\_\_']  
 :lostridiales', u'f\_\_Lachnospiraceae', u'g\_\_[Ruminococcus]', u's\_\_gnavus']  
 >bacillales', u'f\_\_Streptococcaceae', u'g\_\_Streptococcus', u's\_\_']  
 'o\_\_Bacteroidales', u'f\_\_Bacteroidaceae', u'g\_\_Bacteroides', u's\_\_']  
 >bacteria', u'o\_\_Pseudomonadales', u'f\_\_Moraxellaceae', u'g\_\_Acinetobacter', u's\_\_']  
 :lostridiales']  
 i', u'o\_\_Bifidobacteriales', u'f\_\_Bifidobacteriaceae', u'g\_\_Bifidobacterium', u's\_\_']  
 i', u'o\_\_Actinomycetales', u'f\_\_Corynebacteriaceae', u'g\_\_Corynebacterium', u's\_\_']  
 'o\_\_Bacteroidales', u'f\_\_Bacteroidaceae', u'g\_\_Bacteroides', u's\_\_']  
 :lostridiales', u'f\_\_', u'g\_\_', u's\_\_']  
 cteria', u'o\_\_Burkholderiales']  
 :lostridiales', u'f\_\_Lachnospiraceae', u'g\_\_[Ruminococcus]', u's\_\_gnavus']  
 :lostridiales', u'f\_\_Veillonellaceae', u'g\_\_Veillonella', u's\_\_dispar']  
 :lostridiales', u'f\_\_Veillonellaceae', u'g\_\_Veillonella', u's\_\_dispar']  
 >bacteria', u'o\_\_Enterobacteriales', u'f\_\_Enterobacteriaceae', u'g\_\_', u's\_\_']  
 >bacillales', u'f\_\_Streptococcaceae', u'g\_\_Streptococcus', u's\_\_infantis']  
 >bacillales', u'f\_\_Streptococcaceae', u'g\_\_Streptococcus', u's\_\_']  
 >bacteria', u'o\_\_Pseudomonadales', u'f\_\_Pseudomonadaceae', u'g\_\_', u's\_\_']  
 >bacillales', u'f\_\_Streptococcaceae', u'g\_\_Streptococcus', u's\_\_']  
 cteria', u'o\_\_Burkholderiales', u'f\_\_Comamonadaceae']  
 >bacteria', u'o\_\_Pasteurellales', u'f\_\_Pasteurellaceae', u'g\_\_Haemophilus', u's\_\_']  
 >bacillales', u'f\_\_Aerococcaceae', u'g\_\_Alloiococcus', u's\_\_']  
 >bacillales', u'f\_\_Streptococcaceae', u'g\_\_Streptococcus', u's\_\_']  
 >bacteria', u'o\_\_Enterobacteriales', u'f\_\_Enterobacteriaceae', u'g\_\_', u's\_\_']  
 cteria', u'o\_\_Burkholderiales', u'f\_\_Oxalobacteraceae', u'g\_\_', u's\_\_']  
 :lostridiales', u'f\_\_Lachnospiraceae', u'g\_\_Coprococcus', u's\_\_']  
 :lostridiales', u'f\_\_Clostridiaceae', u'g\_\_Clostridium', u's\_\_neonatale']  
 i', u'o\_\_Actinomycetales', u'f\_\_Corynebacteriaceae', u'g\_\_Corynebacterium', u's\_\_']  
 >bacillales', u'f\_\_Streptococcaceae', u'g\_\_Lactococcus', u's\_\_']  
 >bacillales', u'f\_\_Streptococcaceae', u'g\_\_Streptococcus', u's\_\_']  
 'o\_\_Bacteroidales', u'f\_\_Porphyromonadaceae', u'g\_\_Parabacteroides', u's\_\_distasonis']  
 :lostridiales', u'f\_\_Clostridiaceae', u'g\_\_Clostridium', u's\_\_']  
 :lostridiales', u'f\_\_Lachnospiraceae', u'g\_\_[Ruminococcus]', u's\_\_gnavus']  
 >bacillales', u'f\_\_Streptococcaceae', u'g\_\_Streptococcus', u's\_\_']  
 >bacillales', u'f\_\_Streptococcaceae', u'g\_\_Streptococcus', u's\_\_']  
 :lostridiales', u'f\_\_Veillonellaceae', u'g\_\_Megasphaera', u's\_\_']  
 >bacillales', u'f\_\_Streptococcaceae', u'g\_\_Streptococcus', u's\_\_']  
 :lostridiales', u'f\_\_Ruminococcaceae', u'g\_\_Faecalibacterium', u's\_\_prausnitzii']  
 >bacteria', u'o\_\_Pseudomonadales', u'f\_\_Moraxellaceae', u'g\_\_Moraxella', u's\_\_']  
 i', u'o\_\_Actinomycetales', u'f\_\_Corynebacteriaceae', u'g\_\_Corynebacterium', u's\_\_']  
  
 >bacillales', u'f\_\_Streptococcaceae', u'g\_\_Streptococcus', u's\_\_']  
 >bacillales', u'f\_\_Streptococcaceae', u'g\_\_Streptococcus', u's\_\_']  
 i', u'o\_\_Actinomycetales', u'f\_\_Corynebacteriaceae', u'g\_\_Corynebacterium', u's\_\_']  
 >bacillales', u'f\_\_Aerococcaceae', u'g\_\_Alloiococcus', u's\_\_']  
 :lostridiales', u'f\_\_Lachnospiraceae', u'g\_\_[Ruminococcus]', u's\_\_gnavus']  
 :lostridiales', u'f\_\_Lachnospiraceae', u'g\_\_Dorea', u's\_\_']  
 >bacteria', u'o\_\_Enterobacteriales', u'f\_\_Enterobacteriaceae', u'g\_\_', u's\_\_']  
 :lostridiales', u'f\_\_Clostridiaceae', u'g\_\_', u's\_\_']  
 i', u'o\_\_Actinomycetales', u'f\_\_Corynebacteriaceae', u'g\_\_Corynebacterium', u's\_\_']  
 i', u'o\_\_Actinomycetales', u'f\_\_Nocardoidaceae', u'g\_\_', u's\_\_']  
 cteria', u'o\_\_Burkholderiales', u'f\_\_Alcaligenaceae', u'g\_\_Sutterella', u's\_\_']  
 i', u'o\_\_Bifidobacteriales', u'f\_\_Bifidobacteriaceae', u'g\_\_Bifidobacterium', u's\_\_']  
 >bacteria', u'o\_\_Enterobacteriales', u'f\_\_Enterobacteriaceae', u'g\_\_', u's\_\_']  
 >bacteria', u'o\_\_Pasteurellales', u'f\_\_Pasteurellaceae', u'g\_\_Haemophilus', u's\_\_influenzae']

>bacteria', u'o\_\_Pasteurellales', u'f\_\_Pasteurellaceae', u'g\_\_Haemophilus', u's\_\_']  
 'o\_\_Bacteroidales', u'f\_\_Bacteroidaceae', u'g\_\_Bacteroides', u's\_\_fragilis']  
 :lostridiales', u'f\_\_Veillonellaceae', u'g\_\_Veillonella', u's\_\_']  
 cteria', u'o\_\_Burkholderiales', u'f\_\_Comamonadaceae']  
 'o\_\_Bacteroidales', u'f\_\_Bacteroidaceae', u'g\_\_Bacteroides', u's\_\_']  
 >bacillales', u'f\_\_Streptococcaceae', u'g\_\_Streptococcus', u's\_\_']  
 >bacillales', u'f\_\_Streptococcaceae', u'g\_\_Streptococcus', u's\_\_']  
 acteria', u'o\_\_Sphingomonadales', u'f\_\_Sphingomonadaceae', u'g\_\_Novosphingobium', u's\_\_']  
 'o\_\_Bacteroidales', u'f\_\_Porphyromonadaceae', u'g\_\_Parabacteroides', u's\_\_distasonis']  
 :lostridiales', u'f\_\_Veillonellaceae', u'g\_\_Veillonella', u's\_\_dispar']  
 acteria', u'o\_\_Rhizobiales', u'f\_\_Phyllobacteriaceae', u'g\_\_Phyllobacterium', u's\_\_']  
 :lostridiales', u'f\_\_Veillonellaceae', u'g\_\_Veillonella', u's\_\_dispar']  
 cteria', u'o\_\_Burkholderiales', u'f\_\_Comamonadaceae']  
 >bacillales', u'f\_\_Streptococcaceae', u'g\_\_Streptococcus', u's\_\_']  
 >bacillales', u'f\_\_Enterococcaceae', u'g\_\_Enterococcus', u's\_\_']  
 i', u'o\_\_Bifidobacteriales', u'f\_\_Bifidobacteriaceae', u'g\_\_Bifidobacterium', u's\_\_']  
 'o\_\_Bacteroidales', u'f\_\_Porphyromonadaceae', u'g\_\_Porphyromonas', u's\_\_']  
 'o\_\_Cytophagales', u'f\_\_Cytophagaceae', u'g\_\_', u's\_\_']  
 :lostridiales', u'f\_\_Ruminococcaceae', u'g\_\_Faecalibacterium', u's\_\_prausnitzii']  
 >bacteria', u'o\_\_Enterobacteriales', u'f\_\_Enterobacteriaceae', u'g\_\_', u's\_\_']  
 >bacillales', u'f\_\_', u'g\_\_', u's\_\_']  
 i', u'o\_\_Actinomycetales', u'f\_\_Corynebacteriaceae', u'g\_\_Corynebacterium', u's\_\_']  
 :lostridiales', u'f\_\_Clostridiaceae', u'g\_\_Clostridium', u's\_\_neonatale']  
 >bacteria', u'o\_\_Enterobacteriales', u'f\_\_Enterobacteriaceae', u'g\_\_', u's\_\_']  
 >bacillales', u'f\_\_Streptococcaceae', u'g\_\_Streptococcus', u's\_\_']  
 >bacillales', u'f\_\_Streptococcaceae', u'g\_\_Streptococcus', u's\_\_']  
 :lostridiales', u'f\_\_Lachnospiraceae', u'g\_\_', u's\_\_']  
 >bacillales', u'f\_\_Streptococcaceae', u'g\_\_Streptococcus', u's\_\_']  
 i', u'o\_\_Actinomycetales', u'f\_\_Corynebacteriaceae', u'g\_\_Corynebacterium', u's\_\_']  
 i', u'o\_\_Actinomycetales', u'f\_\_Corynebacteriaceae', u'g\_\_Corynebacterium', u's\_\_']  
 :lostridiales', u'f\_\_Clostridiaceae', u'g\_\_Clostridium', u's\_\_neonatale']  
 :lostridiales']  
 i', u'o\_\_Actinomycetales', u'f\_\_Corynebacteriaceae', u'g\_\_Corynebacterium', u's\_\_']  
 >bacteria', u'o\_\_Enterobacteriales', u'f\_\_Enterobacteriaceae', u'g\_\_', u's\_\_']  
 i', u'o\_\_Bifidobacteriales', u'f\_\_Bifidobacteriaceae', u'g\_\_Bifidobacterium', u's\_\_']  
 :lostridiales', u'f\_\_Lachnospiraceae', u'g\_\_[Ruminococcus]', u's\_\_gnavus']  
 i', u'o\_\_Bifidobacteriales', u'f\_\_Bifidobacteriaceae', u'g\_\_Bifidobacterium']  
 lales', u'f\_\_Staphylococcaceae', u'g\_\_Staphylococcus']  
 :lostridiales', u'f\_\_Lachnospiraceae', u'g\_\_', u's\_\_']  
 >bacillales', u'f\_\_Streptococcaceae', u'g\_\_Streptococcus', u's\_\_']  
 :lostridiales', u'f\_\_Clostridiaceae', u'g\_\_', u's\_\_']  
 i', u'o\_\_Bifidobacteriales', u'f\_\_Bifidobacteriaceae', u'g\_\_Bifidobacterium', u's\_\_']  
 >bacillales', u'f\_\_Streptococcaceae', u'g\_\_Streptococcus', u's\_\_']  
 'o\_\_Bacteroidales', u'f\_\_Porphyromonadaceae', u'g\_\_Parabacteroides', u's\_\_distasonis']  
 i', u'o\_\_Actinomycetales', u'f\_\_Corynebacteriaceae', u'g\_\_Corynebacterium', u's\_\_']  
 i', u'o\_\_Actinomycetales', u'f\_\_Actinomycetaceae', u'g\_\_Actinomyces', u's\_\_']  
 >bacillales', u'f\_\_Streptococcaceae', u'g\_\_Streptococcus', u's\_\_']  
 i', u'o\_\_Bifidobacteriales', u'f\_\_Bifidobacteriaceae', u'g\_\_Bifidobacterium', u's\_\_']  
 >bacillales', u'f\_\_Carnobacteriaceae', u'g\_\_Granulicatella', u's\_\_']  
 >bacillales', u'f\_\_Streptococcaceae', u'g\_\_Streptococcus', u's\_\_']  
 :lostridiales', u'f\_\_Ruminococcaceae', u'g\_\_', u's\_\_']  
 cteria', u'o\_\_Burkholderiales', u'f\_\_Alcaligenaceae', u'g\_\_Sutterella', u's\_\_']  
 :lostridiales', u'f\_\_Lachnospiraceae', u'g\_\_Coprococcus', u's\_\_']  
 cteria', u'o\_\_Burkholderiales', u'f\_\_Comamonadaceae', u'g\_\_', u's\_\_']  
 'o\_\_Bacteroidales', u'f\_\_Bacteroidaceae', u'g\_\_Bacteroides', u's\_\_']  
 i', u'o\_\_Bifidobacteriales', u'f\_\_Bifidobacteriaceae', u'g\_\_Bifidobacterium', u's\_\_']

lales', u'f\_\_Staphylococcaceae', u'g\_\_Staphylococcus', u's\_\_']  
 >bacillales', u'f\_\_Lactobacillaceae', u'g\_\_Lactobacillus', u's\_\_']  
 cteria', u'o\_\_Burkholderiales', u'f\_\_Oxalobacteraceae', u'g\_\_', u's\_\_']  
 >bacteria', u'o\_\_Pasteurellales', u'f\_\_Pasteurellaceae', u'g\_\_Haemophilus', u's\_\_']  
 :lostridiales', u'f\_\_Veillonellaceae', u'g\_\_Megamonas', u's\_\_']  
 >bacillales', u'f\_\_Aerococcaceae', u'g\_\_Alloiococcus', u's\_\_']  
 :lostridiales', u'f\_\_Lachnospiraceae', u'g\_\_', u's\_\_']  
 >bacillales', u'f\_\_', u'g\_\_', u's\_\_']  
 >bacillales', u'f\_\_Streptococcaceae', u'g\_\_Streptococcus', u's\_\_']  
 :lostridiales']  
 >bacillales', u'f\_\_Streptococcaceae', u'g\_\_Streptococcus', u's\_\_']  
 lales', u'f\_\_Staphylococcaceae', u'g\_\_Staphylococcus']  
 'o\_\_Bacteroidales', u'f\_\_Bacteroidaceae', u'g\_\_Bacteroides', u's\_\_']  
 >bacteria', u'o\_\_Pasteurellales', u'f\_\_Pasteurellaceae', u'g\_\_Haemophilus', u's\_\_']  
 >bacillales', u'f\_\_Streptococcaceae', u'g\_\_Streptococcus', u's\_\_']  
 :lostridiales', u'f\_\_Lachnospiraceae', u'g\_\_', u's\_\_']  
 >bacteria', u'o\_\_Enterobacteriales', u'f\_\_Enterobacteriaceae', u'g\_\_', u's\_\_']  
 'o\_\_Bacteroidales', u'f\_\_Prevotellaceae', u'g\_\_Prevotella', u's\_\_']  
 >bacillales', u'f\_\_Streptococcaceae', u'g\_\_Streptococcus', u's\_\_']  
 i', u'o\_\_Actinomycetales', u'f\_\_Corynebacteriaceae', u'g\_\_Corynebacterium', u's\_\_']  
 'o\_\_Bacteroidales', u'f\_\_Bacteroidaceae', u'g\_\_Bacteroides', u's\_\_']  
 >bacillales', u'f\_\_Streptococcaceae', u'g\_\_Streptococcus', u's\_\_']  
 >bacteria', u'o\_\_Enterobacteriales', u'f\_\_Enterobacteriaceae', u'g\_\_', u's\_\_']  
 >bacillales', u'f\_\_Enterococcaceae', u'g\_\_Enterococcus', u's\_\_']  
 >bacillales', u'f\_\_Streptococcaceae', u'g\_\_Streptococcus', u's\_\_']  
 i', u'o\_\_Actinomycetales', u'f\_\_Corynebacteriaceae', u'g\_\_Corynebacterium', u's\_\_']  
 >bacillales', u'f\_\_Streptococcaceae', u'g\_\_Streptococcus', u's\_\_']  
 :lostridiales', u'f\_\_Clostridiaceae', u'g\_\_Clostridium', u's\_\_']  
 :lostridiales', u'f\_\_Lachnospiraceae', u'g\_\_[Ruminococcus]', u's\_\_']  
 :lostridiales', u'f\_\_Veillonellaceae', u'g\_\_Veillonella', u's\_\_dispar']  
 i', u'o\_\_Actinomycetales', u'f\_\_Nocardoidaceae', u'g\_\_', u's\_\_']  
 >bacillales', u'f\_\_Streptococcaceae', u'g\_\_Streptococcus', u's\_\_']  
 >bacillales', u'f\_\_Streptococcaceae', u'g\_\_Streptococcus', u's\_\_']  
 'obiae', u'o\_\_Verrucomicrobiales', u'f\_\_Verrucomicrobiaceae', u'g\_\_Akkermansia', u's\_\_muciniphila']  
 :lostridiales', u'f\_\_Clostridiaceae', u'g\_\_Clostridium', u's\_\_butyricum']  
 cteria', u'o\_\_Burkholderiales', u'f\_\_Oxalobacteraceae', u'g\_\_', u's\_\_']  
 >bacillales', u'f\_\_Streptococcaceae', u'g\_\_Streptococcus', u's\_\_']  
 :lostridiales', u'f\_\_[Tissierellaceae]', u'g\_\_Fingoldia', u's\_\_']  
 :lostridiales', u'f\_\_Lachnospiraceae']  
 cteria', u'o\_\_Burkholderiales', u'f\_\_Alcaligenaceae', u'g\_\_Sutterella', u's\_\_']  
 i', u'o\_\_Actinomycetales', u'f\_\_Corynebacteriaceae', u'g\_\_Corynebacterium', u's\_\_']  
 >bacteria', u'o\_\_Pasteurellales', u'f\_\_Pasteurellaceae', u'g\_\_Haemophilus', u's\_\_']  
 >bacteria', u'o\_\_Pasteurellales', u'f\_\_Pasteurellaceae', u'g\_\_Haemophilus', u's\_\_']  
 >bacillales', u'f\_\_Aerococcaceae', u'g\_\_Alloiococcus', u's\_\_']  
 >bacillales', u'f\_\_Streptococcaceae', u'g\_\_Streptococcus', u's\_\_']  
 :lostridiales', u'f\_\_Lachnospiraceae', u'g\_\_[Ruminococcus]', u's\_\_gnavus']  
 'o\_\_Bacteroidales', u'f\_\_Porphyromonadaceae', u'g\_\_Parabacteroides', u's\_\_distasonis']  
 :lostridiales', u'f\_\_Lachnospiraceae', u'g\_\_[Ruminococcus]', u's\_\_']  
 i', u'o\_\_Bifidobacteriales', u'f\_\_Bifidobacteriaceae', u'g\_\_Bifidobacterium', u's\_\_']  
 >bacteria', u'o\_\_Pasteurellales', u'f\_\_Pasteurellaceae', u'g\_\_Haemophilus', u's\_\_parainfluenzae']  
 'o\_\_Bacteroidales', u'f\_\_Porphyromonadaceae', u'g\_\_Parabacteroides', u's\_\_distasonis']  
 >bacillales', u'f\_\_Streptococcaceae', u'g\_\_Streptococcus', u's\_\_infantis']  
 i', u'o\_\_Actinomycetales', u'f\_\_Corynebacteriaceae', u'g\_\_Corynebacterium', u's\_\_']  
 >bacillales', u'f\_\_Streptococcaceae', u'g\_\_Streptococcus', u's\_\_']  
 >bacillales', u'f\_\_Streptococcaceae', u'g\_\_Streptococcus', u's\_\_']  
 'o\_\_Bacteroidales', u'f\_\_Bacteroidaceae', u'g\_\_Bacteroides', u's\_\_']

:lostridiales', u'f\_\_Veillonellaceae', u'g\_\_Veillonella', u's\_\_dispar']  
 )\_\_Caldilineales', u'f\_\_Caldilineaceae', u'g\_\_', u's\_\_']  
 >bacillales', u'f\_\_Streptococcaceae', u'g\_\_Streptococcus', u's\_\_']  
 i', u'o\_\_Actinomycetales', u'f\_\_Corynebacteriaceae', u'g\_\_Corynebacterium', u's\_\_']  
 :lostridiales', u'f\_\_Clostridiaceae', u'g\_\_Clostridium', u's\_\_']  
 lales', u'f\_\_Staphylococcaceae', u'g\_\_Staphylococcus', u's\_\_']  
 >bacteria', u'o\_\_Enterobacteriales', u'f\_\_Enterobacteriaceae', u'g\_\_', u's\_\_']  
 :lostridiales', u'f\_\_Lachnospiraceae', u'g\_\_', u's\_\_']  
 >bacillales', u'f\_\_Aerococcaceae', u'g\_\_Alloiococcus', u's\_\_']  
 :lostridiales', u'f\_\_Clostridiaceae', u'g\_\_', u's\_\_']  
 >bacillales', u'f\_\_Streptococcaceae', u'g\_\_Streptococcus', u's\_\_']  
 'o\_\_Bacteroidales', u'f\_\_[Barnesiellaceae]', u'g\_\_', u's\_\_']  
 'o\_\_Bacteroidales', u'f\_\_Bacteroidaceae', u'g\_\_Bacteroides', u's\_\_']  
 :lostridiales', u'f\_\_Lachnospiraceae', u'g\_\_Dorea', u's\_\_']  
 :lostridiales', u'f\_\_Lachnospiraceae', u'g\_\_Coprococcus', u's\_\_']  
 :lostridiales', u'f\_\_Lachnospiraceae', u'g\_\_', u's\_\_']  
 >bacillales', u'f\_\_Streptococcaceae', u'g\_\_Streptococcus', u's\_\_']  
 :lostridiales', u'f\_\_Lachnospiraceae', u'g\_\_Blautia', u's\_\_']  
 >bacillales', u'f\_\_Streptococcaceae', u'g\_\_Streptococcus', u's\_\_']  
 i', u'o\_\_Actinomycetales', u'f\_\_Corynebacteriaceae', u'g\_\_Corynebacterium', u's\_\_']  
 :lostridiales', u'f\_\_Lachnospiraceae', u'g\_\_Coprococcus', u's\_\_']  
 :lostridiales', u'f\_\_Lachnospiraceae', u'g\_\_', u's\_\_']  
 >bacillales', u'f\_\_Streptococcaceae', u'g\_\_Streptococcus', u's\_\_']  
 >bacillales', u'f\_\_Streptococcaceae', u'g\_\_Streptococcus', u's\_\_']  
 >bacillales', u'f\_\_Streptococcaceae', u'g\_\_Streptococcus', u's\_\_']  
 i', u'o\_\_Actinomycetales', u'f\_\_Corynebacteriaceae', u'g\_\_Corynebacterium', u's\_\_']  
 acteria', u'o\_\_Rhodospirillales', u'f\_\_Rhodospirillaceae', u'g\_\_', u's\_\_']  
 >bacillales', u'f\_\_Aerococcaceae', u'g\_\_Alloiococcus', u's\_\_']  
 i', u'o\_\_Actinomycetales', u'f\_\_Corynebacteriaceae', u'g\_\_Corynebacterium', u's\_\_']  
 >bacillales', u'f\_\_Streptococcaceae', u'g\_\_Streptococcus', u's\_\_']  
 >bacillales', u'f\_\_Lactobacillaceae', u'g\_\_Lactobacillus', u's\_\_zeae']  
 'o\_\_Bacteroidales', u'f\_\_Bacteroidaceae', u'g\_\_Bacteroides', u's\_\_']  
 'o\_\_Bacteroidales', u'f\_\_[Paraprevotellaceae]', u'g\_\_Paraprevotella', u's\_\_']  
 >bacillales', u'f\_\_Streptococcaceae', u'g\_\_Streptococcus', u's\_\_']  
 :lostridiales', u'f\_\_Veillonellaceae', u'g\_\_Veillonella', u's\_\_dispar']  
 >bacillales', u'f\_\_Streptococcaceae', u'g\_\_Streptococcus', u's\_\_']  
 >bacteria', u'o\_\_Enterobacteriales', u'f\_\_Enterobacteriaceae', u'g\_\_', u's\_\_']  
 >bacteria', u'o\_\_Enterobacteriales', u'f\_\_Enterobacteriaceae', u'g\_\_Erwinia', u's\_\_']  
 >bacillales', u'f\_\_Streptococcaceae', u'g\_\_Streptococcus', u's\_\_']  
 >bacillales', u'f\_\_Enterococcaceae', u'g\_\_Enterococcus', u's\_\_']  
 :lostridiales', u'f\_\_Veillonellaceae', u'g\_\_Veillonella', u's\_\_dispar']  
 i', u'o\_\_Actinomycetales', u'f\_\_Corynebacteriaceae', u'g\_\_Corynebacterium', u's\_\_']  
 :lostridiales', u'f\_\_Lachnospiraceae', u'g\_\_', u's\_\_']  
 cteria', u'o\_\_Burkholderiales', u'f\_\_Comamonadaceae', u'g\_\_', u's\_\_']  
 i', u'o\_\_Bifidobacteriales', u'f\_\_Bifidobacteriaceae', u'g\_\_Bifidobacterium']  
 :lostridiales', u'f\_\_Lachnospiraceae', u'g\_\_', u's\_\_']  
 'obiae', u'o\_\_Verrucomicrobiales', u'f\_\_Verrucomicrobiaceae', u'g\_\_Akkermansia', u's\_\_muciniphila']  
 >bacillales', u'f\_\_Streptococcaceae', u'g\_\_Streptococcus', u's\_\_']  
 'o\_\_Bacteroidales', u'f\_\_Bacteroidaceae', u'g\_\_Bacteroides', u's\_\_']  
 >bacillales', u'f\_\_Enterococcaceae', u'g\_\_Enterococcus']  
 i', u'o\_\_Actinomycetales', u'f\_\_Corynebacteriaceae', u'g\_\_Corynebacterium', u's\_\_']  
 >bacillales', u'f\_\_Streptococcaceae', u'g\_\_Streptococcus', u's\_\_']  
 :lostridiales', u'f\_\_Lachnospiraceae', u'g\_\_Blautia', u's\_\_']  
 'o\_\_Bacteroidales', u'f\_\_Prevotellaceae', u'g\_\_Prevotella', u's\_\_']  
 >bacteria', u'o\_\_Enterobacteriales', u'f\_\_Enterobacteriaceae', u'g\_\_Citrobacter', u's\_\_']  
 cteria', u'o\_\_Burkholderiales', u'f\_\_Oxalobacteraceae', u'g\_\_', u's\_\_']

:lostridiales', u'f\_\_Clostridiaceae', u'g\_\_Clostridium']  
 >bacteria', u'o\_\_Pseudomonadales', u'f\_\_Moraxellaceae', u'g\_\_Acinetobacter', u's\_\_']  
 >bacillales', u'f\_\_Streptococcaceae', u'g\_\_Streptococcus', u's\_\_']  
 >bacillales', u'f\_\_Streptococcaceae', u'g\_\_Streptococcus', u's\_\_']  
 cteria', u'o\_\_Burkholderiales', u'f\_\_Comamonadaceae', u'g\_\_', u's\_\_']  
 >bacteria', u'o\_\_Enterobacteriales', u'f\_\_Enterobacteriaceae', u'g\_\_', u's\_\_']  
 >bacillales', u'f\_\_Streptococcaceae', u'g\_\_Streptococcus', u's\_\_']  
 cteria', u'o\_\_Burkholderiales', u'f\_\_Comamonadaceae', u'g\_\_', u's\_\_']  
 :lostridiales', u'f\_\_Veillonellaceae', u'g\_\_Veillonella', u's\_\_']  
 'o\_\_Bacteroidales', u'f\_\_Bacteroidaceae', u'g\_\_Bacteroides', u's\_\_']  
 'o\_\_Bacteroidales', u'f\_\_[Paraprevotellaceae]', u'g\_\_[Prevotella]', u's\_\_']  
 >bacillales', u'f\_\_Streptococcaceae', u'g\_\_Streptococcus', u's\_\_']  
 >bacillales', u'f\_\_Lactobacillaceae', u'g\_\_Lactobacillus', u's\_\_']  
 cteria', u'o\_\_Burkholderiales', u'f\_\_Comamonadaceae', u'g\_\_', u's\_\_']  
 :lostridiales', u'f\_\_Ruminococcaceae', u'g\_\_Faecalibacterium', u's\_\_prausnitzii']  
 'o\_\_Bacteroidales', u'f\_\_Bacteroidaceae', u'g\_\_Bacteroides', u's\_\_']  
 >bacteria', u'o\_\_Pasteurellales', u'f\_\_Pasteurellaceae', u'g\_\_Haemophilus', u's\_\_']  
 cteria', u'o\_\_Burkholderiales', u'f\_\_Comamonadaceae', u'g\_\_', u's\_\_']  
 >bacillales', u'f\_\_Streptococcaceae', u'g\_\_Streptococcus', u's\_\_']  
 >bacillales', u'f\_\_Streptococcaceae', u'g\_\_Streptococcus', u's\_\_']  
 :lostridiales', u'f\_\_Veillonellaceae', u'g\_\_Veillonella', u's\_\_dispar']  
 'o\_\_Bacteroidales', u'f\_\_[Barnesiellaceae]', u'g\_\_', u's\_\_']  
 :lostridiales', u'f\_\_Lachnospiraceae', u'g\_\_[Ruminococcus]', u's\_\_gnavus']  
 'l', u'o\_\_Bifidobacteriales', u'f\_\_Bifidobacteriaceae', u'g\_\_Bifidobacterium', u's\_\_']  
 'l', u'o\_\_Bifidobacteriales', u'f\_\_Bifidobacteriaceae', u'g\_\_Bifidobacterium']  
 :lostridiales', u'f\_\_Lachnospiraceae', u'g\_\_[Ruminococcus]', u's\_\_']  
 :lostridiales', u'f\_\_Lachnospiraceae', u'g\_\_[Ruminococcus]', u's\_\_gnavus']  
 >\_\_Erysipelotrichales', u'f\_\_Erysipelotrichaceae', u'g\_\_', u's\_\_']  
 >bacteria', u'o\_\_Pasteurellales', u'f\_\_Pasteurellaceae', u'g\_\_Haemophilus', u's\_\_']  
 :lostridiales', u'f\_\_Lachnospiraceae']  
 >bacillales', u'f\_\_Streptococcaceae', u'g\_\_Streptococcus', u's\_\_']  
 >\_\_Erysipelotrichales', u'f\_\_Erysipelotrichaceae', u'g\_\_', u's\_\_']  
 'o\_\_Bacteroidales', u'f\_\_Bacteroidaceae', u'g\_\_Bacteroides', u's\_\_']  
 >bacillales', u'f\_\_Aerococcaceae', u'g\_\_Alloiococcus', u's\_\_']  
 :lostridiales', u'f\_\_Lachnospiraceae', u'g\_\_', u's\_\_']  
 cteria', u'o\_\_Burkholderiales', u'f\_\_Alcaligenaceae', u'g\_\_Sutterella', u's\_\_']  
 :lostridiales', u'f\_\_Veillonellaceae', u'g\_\_Veillonella', u's\_\_dispar']  
 's\_\_']  
 cteria', u'o\_\_Burkholderiales', u'f\_\_Alcaligenaceae', u'g\_\_Sutterella', u's\_\_']  
 >bacillales', u'f\_\_Lactobacillaceae', u'g\_\_Pediococcus', u's\_\_']  
 >bacillales', u'f\_\_Streptococcaceae', u'g\_\_Streptococcus', u's\_\_']  
 :lostridiales', u'f\_\_Veillonellaceae', u'g\_\_Veillonella', u's\_\_']  
 >bacillales', u'f\_\_Streptococcaceae', u'g\_\_Streptococcus', u's\_\_']  
 >bacillales', u'f\_\_Streptococcaceae', u'g\_\_Streptococcus', u's\_\_']  
 :lostridiales', u'f\_\_Peptostreptococcaceae', u'g\_\_', u's\_\_']  
 'o\_\_Bacteroidales', u'f\_\_Bacteroidaceae', u'g\_\_Bacteroides', u's\_\_']  
 >bacillales', u'f\_\_Enterococcaceae', u'g\_\_Enterococcus', u's\_\_']  
 'l', u'o\_\_Actinomycetales', u'f\_\_Actinomycetaceae', u'g\_\_Actinomyces', u's\_\_']  
 'l', u'o\_\_Actinomycetales', u'f\_\_Corynebacteriaceae', u'g\_\_Corynebacterium', u's\_\_']  
 :lostridiales', u'f\_\_[Tissierellaceae]', u'g\_\_Fingoldia', u's\_\_']  
 >bacillales', u'f\_\_Streptococcaceae', u'g\_\_Streptococcus', u's\_\_']  
 >bacillales', u'f\_\_Lactobacillaceae', u'g\_\_Lactobacillus', u's\_\_zeae']  
 >bacillales', u'f\_\_Streptococcaceae', u'g\_\_Streptococcus', u's\_\_']  
 'l', u'o\_\_Actinomycetales', u'f\_\_Corynebacteriaceae', u'g\_\_Corynebacterium', u's\_\_']  
 'l', u'o\_\_Actinomycetales', u'f\_\_Corynebacteriaceae', u'g\_\_Corynebacterium', u's\_\_']  
 :lostridiales', u'f\_\_Veillonellaceae', u'g\_\_Veillonella', u's\_\_']

'o\_\_Bacteroidales', u'f\_\_Bacteroidaceae', u'g\_\_Bacteroides', u's\_\_fragilis']  
>bacteria', u'o\_\_Enterobacteriales', u'f\_\_Enterobacteriaceae', u'g\_\_', u's\_\_']  
:lostridiales', u'f\_\_Lachnospiraceae', u'g\_\_', u's\_\_']  
i', u'o\_\_Actinomycetales', u'f\_\_Corynebacteriaceae', u'g\_\_Corynebacterium', u's\_\_']  
:lostridiales', u'f\_\_Veillonellaceae', u'g\_\_Veillonella', u's\_\_dispar']  
'o\_\_Bacteroidales', u'f\_\_Bacteroidaceae', u'g\_\_Bacteroides', u's\_\_']  
>bacteria', u'o\_\_Enterobacteriales', u'f\_\_Enterobacteriaceae', u'g\_\_', u's\_\_']  
:lostridiales', u'f\_\_Clostridiaceae', u'g\_\_', u's\_\_']  
>bacillales', u'f\_\_Enterococcaceae', u'g\_\_Enterococcus']  
i', u'o\_\_Actinomycetales', u'f\_\_Corynebacteriaceae', u'g\_\_Corynebacterium', u's\_\_']  
'o\_\_Bacteroidales', u'f\_\_[Paraprevotellaceae]', u'g\_\_Paraprevotella', u's\_\_']  
>bacillales', u'f\_\_Lactobacillaceae', u'g\_\_Lactobacillus', u's\_\_']  
>bacillales', u'f\_\_Streptococcaceae', u'g\_\_Streptococcus', u's\_\_']  
'o\_\_Bacteroidales', u'f\_\_Bacteroidaceae', u'g\_\_Bacteroides', u's\_\_']  
acteria', u'o\_\_Rhodobacterales', u'f\_\_Rhodobacteraceae', u'g\_\_Paracoccus', u's\_\_aminovorans']  
'o\_\_Cytophagales', u'f\_\_Cytophagaceae', u'g\_\_', u's\_\_']  
'o\_\_Bacteroidales', u'f\_\_Bacteroidaceae', u'g\_\_Bacteroides', u's\_\_']  
:lostridiales', u'f\_\_Lachnospiraceae']  
>bacillales', u'f\_\_Streptococcaceae', u'g\_\_Streptococcus', u's\_\_']  
acteria', u'o\_\_Neisseriales', u'f\_\_Neisseriaceae', u'g\_\_', u's\_\_']  
>bacteria', u'o\_\_Enterobacteriales', u'f\_\_Enterobacteriaceae', u'g\_\_', u's\_\_']  
>bacillales', u'f\_\_Lactobacillaceae', u'g\_\_Lactobacillus', u's\_\_zeae']  
'o\_\_Bacteroidales', u'f\_\_Porphyromonadaceae', u'g\_\_Parabacteroides', u's\_\_distasonis']  
:lostridiales', u'f\_\_Veillonellaceae', u'g\_\_Veillonella', u's\_\_']  
>bacillales', u'f\_\_Enterococcaceae', u'g\_\_Enterococcus']  
:lostridiales', u'f\_\_Lachnospiraceae']  
>bacillales', u'f\_\_Streptococcaceae', u'g\_\_Streptococcus', u's\_\_']  
>bacteria', u'o\_\_Enterobacteriales', u'f\_\_Enterobacteriaceae', u'g\_\_', u's\_\_']  
>bacteria', u'o\_\_Enterobacteriales', u'f\_\_Enterobacteriaceae', u'g\_\_', u's\_\_']  
:lostridiales', u'f\_\_Lachnospiraceae', u'g\_\_Dorea', u's\_\_']  
>bacteria', u'o\_\_Pseudomonadales', u'f\_\_Moraxellaceae', u'g\_\_Acinetobacter', u's\_\_']  
>bacillales', u'f\_\_Streptococcaceae', u'g\_\_Streptococcus', u's\_\_']  
'o\_\_Bacteroidales', u'f\_\_Bacteroidaceae', u'g\_\_Bacteroides', u's\_\_']  
>bacteria', u'o\_\_Enterobacteriales', u'f\_\_Enterobacteriaceae', u'g\_\_', u's\_\_']  
>bacteria', u'o\_\_Pasteurellales', u'f\_\_Pasteurellaceae', u'g\_\_Haemophilus', u's\_\_']  
i', u'o\_\_Bifidobacteriales', u'f\_\_Bifidobacteriaceae', u'g\_\_Bifidobacterium', u's\_\_']  
>bacteria', u'o\_\_Enterobacteriales', u'f\_\_Enterobacteriaceae', u'g\_\_', u's\_\_']  
'o\_\_Bacteroidales', u'f\_\_Bacteroidaceae', u'g\_\_Bacteroides', u's\_\_']  
'o\_\_Bacteroidales', u'f\_\_Bacteroidaceae', u'g\_\_Bacteroides', u's\_\_']  
:lostridiales', u'f\_\_Lachnospiraceae', u'g\_\_Coprococcus', u's\_\_']  
:lostridiales', u'f\_\_Eubacteriaceae', u'g\_\_Pseudoramibacter\_Eubacterium', u's\_\_']  
ellales']  
i', u'o\_\_Actinomycetales', u'f\_\_Corynebacteriaceae', u'g\_\_Corynebacterium', u's\_\_']  
acteria', u'o\_\_Burkholderiales', u'f\_\_Comamonadaceae']  
:lostridiales', u'f\_\_Veillonellaceae', u'g\_\_Megasphaera', u's\_\_']  
>bacillales', u'f\_\_Streptococcaceae', u'g\_\_Streptococcus', u's\_\_']  
acteria', u'o\_\_Caulobacterales', u'f\_\_Caulobacteraceae', u'g\_\_', u's\_\_']  
>bacillales', u'f\_\_Streptococcaceae', u'g\_\_Streptococcus', u's\_\_']  
:lostridiales', u'f\_\_Veillonellaceae', u'g\_\_Veillonella', u's\_\_']  
:lostridiales', u'f\_\_Veillonellaceae', u'g\_\_Veillonella', u's\_\_']  
>bacteria', u'o\_\_Pseudomonadales', u'f\_\_Moraxellaceae', u'g\_\_Moraxella', u's\_\_']  
>bacillales', u'f\_\_Streptococcaceae', u'g\_\_Streptococcus', u's\_\_']  
:lostridiales', u'f\_\_', u'g\_\_', u's\_\_']  
i', u'o\_\_Actinomycetales', u'f\_\_Nocardoidaceae', u'g\_\_', u's\_\_']  
>bacillales', u'f\_\_Aerococcaceae', u'g\_\_Alloiococcus', u's\_\_']  
:lostridiales', u'f\_\_Clostridiaceae', u'g\_\_', u's\_\_']

i', u'o\_\_Actinomycetales', u'f\_\_Corynebacteriaceae', u'g\_\_Corynebacterium', u's\_\_']  
 >bacteria', u'o\_\_Enterobacteriales', u'f\_\_Enterobacteriaceae', u'g\_\_', u's\_\_']  
 >bacillales', u'f\_\_Streptococcaceae', u'g\_\_Streptococcus', u's\_\_']  
 :lostridiales', u'f\_\_', u'g\_\_', u's\_\_']  
 :lostridiales', u'f\_\_Lachnospiraceae', u'g\_\_Dorea', u's\_\_']  
 >bacteria', u'o\_\_Pseudomonadales', u'f\_\_Pseudomonadaceae', u'g\_\_Pseudomonas', u's\_\_']  
 >bacillales', u'f\_\_Streptococcaceae', u'g\_\_Streptococcus', u's\_\_']  
 >bacillales', u'f\_\_Lactobacillaceae', u'g\_\_Lactobacillus', u's\_\_']  
 :lostridiales', u'f\_\_Clostridiaceae', u'g\_\_Clostridium', u's\_\_neonatale']  
 >bacteria', u'o\_\_Pseudomonadales', u'f\_\_Pseudomonadaceae', u'g\_\_Pseudomonas', u's\_\_']  
 'o\_\_Bacteroidales', u'f\_\_Bacteroidaceae', u'g\_\_Bacteroides', u's\_\_']  
 :lostridiales', u'f\_\_Lachnospiraceae', u'g\_\_Blautia', u's\_\_']  
 :lostridiales', u'f\_\_Lachnospiraceae', u'g\_\_', u's\_\_']  
 >bacillales', u'f\_\_Aerococcaceae', u'g\_\_Alloiococcus', u's\_\_']  
 >bacteria', u'o\_\_Enterobacteriales', u'f\_\_Enterobacteriaceae', u'g\_\_', u's\_\_']  
 'o\_\_Bacteroidales', u'f\_\_Bacteroidaceae', u'g\_\_Bacteroides', u's\_\_']  
 >bacillales', u'f\_\_Streptococcaceae', u'g\_\_Streptococcus', u's\_\_']  
 :lostridiales', u'f\_\_Lachnospiraceae', u'g\_\_Dorea', u's\_\_']  
 i', u'o\_\_Actinomycetales', u'f\_\_Corynebacteriaceae', u'g\_\_Corynebacterium', u's\_\_']  
 >bacillales', u'f\_\_Streptococcaceae', u'g\_\_Streptococcus', u's\_\_']  
 acteria', u'o\_\_Rhizobiales', u'f\_\_Phyllobacteriaceae', u'g\_\_Phyllobacterium', u's\_\_']  
 >bacillales', u'f\_\_Streptococcaceae', u'g\_\_Streptococcus', u's\_\_']  
 >bacillales', u'f\_\_Aerococcaceae', u'g\_\_Alloiococcus', u's\_\_']  
 >bacillales', u'f\_\_Streptococcaceae', u'g\_\_Streptococcus']  
 >bacillales', u'f\_\_Streptococcaceae', u'g\_\_Streptococcus', u's\_\_']  
 >bacillales', u'f\_\_Streptococcaceae', u'g\_\_Streptococcus', u's\_\_']  
 >bacteria', u'o\_\_Enterobacteriales', u'f\_\_Enterobacteriaceae', u'g\_\_', u's\_\_']  
 >bacillales', u'f\_\_Enterococcaceae']  
 >bacteria', u'o\_\_Pseudomonadales', u'f\_\_Moraxellaceae', u'g\_\_Moraxella', u's\_\_']  
 :lostridiales', u'f\_\_Lachnospiraceae', u'g\_\_', u's\_\_']  
 >bacteria', u'o\_\_Pseudomonadales', u'f\_\_Pseudomonadaceae', u'g\_\_Pseudomonas', u's\_\_viridiflava']  
 >bacillales', u'f\_\_Streptococcaceae', u'g\_\_Streptococcus', u's\_\_']  
 :lostridiales', u'f\_\_Veillonellaceae', u'g\_\_Veillonella', u's\_\_']  
 'o\_\_Bacteroidales', u'f\_\_Bacteroidaceae', u'g\_\_Bacteroides', u's\_\_']  
 >bacteria', u'o\_\_Pasteurellales', u'f\_\_Pasteurellaceae', u'g\_\_Haemophilus', u's\_\_influenzae']  
 >bacillales', u'f\_\_Lactobacillaceae', u'g\_\_Lactobacillus', u's\_\_']  
 :lostridiales', u'f\_\_Lachnospiraceae', u'g\_\_', u's\_\_']  
 'o\_\_Bacteroidales', u'f\_\_Bacteroidaceae', u'g\_\_Bacteroides', u's\_\_']  
 >bacillales', u'f\_\_Streptococcaceae', u'g\_\_Streptococcus', u's\_\_']  
 'o\_\_Bacteroidales', u'f\_\_Porphyromonadaceae', u'g\_\_Parabacteroides', u's\_\_']  
 :lostridiales', u'f\_\_Veillonellaceae', u'g\_\_Veillonella', u's\_\_']  
 >bacillales', u'f\_\_Streptococcaceae', u'g\_\_Streptococcus', u's\_\_']  
 >bacteria', u'o\_\_Enterobacteriales', u'f\_\_Enterobacteriaceae', u'g\_\_', u's\_\_']  
 >bacteria', u'o\_\_Enterobacteriales', u'f\_\_Enterobacteriaceae', u'g\_\_', u's\_\_']  
 >bacillales', u'f\_\_Streptococcaceae', u'g\_\_Streptococcus', u's\_\_']  
 acteria', u'o\_\_Burkholderiales', u'f\_\_Comamonadaceae', u'g\_\_', u's\_\_']  
 >bacteria', u'o\_\_Pseudomonadales', u'f\_\_Pseudomonadaceae', u'g\_\_Pseudomonas', u's\_\_']  
 >bacillales', u'f\_\_Streptococcaceae', u'g\_\_Streptococcus', u's\_\_']  
 >bacillales', u'f\_\_Streptococcaceae', u'g\_\_Streptococcus', u's\_\_']  
 :lostridiales', u'f\_\_Lachnospiraceae']  
 :lostridiales', u'f\_\_Lachnospiraceae', u'g\_\_', u's\_\_']  
 i', u'o\_\_Bifidobacteriales', u'f\_\_Bifidobacteriaceae', u'g\_\_Bifidobacterium', u's\_\_']  
 :lostridiales', u'f\_\_Ruminococcaceae', u'g\_\_', u's\_\_']  
 lales', u'f\_\_Staphylococcaceae', u'g\_\_Staphylococcus', u's\_\_epidermidis']  
 :lostridiales']  
 >bacillales', u'f\_\_Streptococcaceae', u'g\_\_Streptococcus', u's\_\_']

>bacteria', u'o\_\_Enterobacteriales', u'f\_\_Enterobacteriaceae', u'g\_\_', u's\_\_']  
 :lostridiales', u'f\_\_Veillonellaceae', u'g\_\_Veillonella', u's\_\_dispar']  
 'o\_\_Bacteroidales', u'f\_\_Bacteroidaceae', u'g\_\_Bacteroides', u's\_\_uniformis']  
 acteria', u'o\_\_Rhizobiales', u'f\_\_Phyllobacteriaceae', u'g\_\_Phyllobacterium', u's\_\_']  
 >bacteria', u'o\_\_Enterobacteriales', u'f\_\_Enterobacteriaceae', u'g\_\_Citrobacter', u's\_\_']  
 >bacillales', u'f\_\_Streptococcaceae', u'g\_\_Streptococcus', u's\_\_']  
 >bacteria', u'o\_\_Enterobacteriales', u'f\_\_Enterobacteriaceae', u'g\_\_', u's\_\_']  
 :lostridiales', u'f\_\_Lachnospiraceae', u'g\_\_Dorea', u's\_\_']  
 'l', u'o\_\_Actinomycetales', u'f\_\_Corynebacteriaceae', u'g\_\_Corynebacterium', u's\_\_']  
 :lostridiales', u'f\_\_Lachnospiraceae', u'g\_\_[Ruminococcus]', u's\_\_gnavus']  
 'o\_\_Bacteroidales', u'f\_\_Bacteroidaceae', u'g\_\_Bacteroides', u's\_\_']  
 'o\_\_Bacteroidales', u'f\_\_Porphyromonadaceae', u'g\_\_Parabacteroides', u's\_\_distasonis']  
 'l', u'o\_\_Bifidobacteriales', u'f\_\_Bifidobacteriaceae', u'g\_\_Bifidobacterium', u's\_\_longum']  
 >bacillales', u'f\_\_Aerococcaceae', u'g\_\_Alloiococcus', u's\_\_']  
 :lostridiales', u'f\_\_Clostridiaceae', u'g\_\_', u's\_\_']  
 :lostridiales', u'f\_\_Lachnospiraceae', u'g\_\_Coprococcus', u's\_\_']  
 >bacillales', u'f\_\_Enterococcaceae', u'g\_\_Enterococcus', u's\_\_']  
 >bacillales', u'f\_\_Aerococcaceae', u'g\_\_Alloiococcus', u's\_\_']  
 :lostridiales', u'f\_\_Lachnospiraceae', u'g\_\_[Ruminococcus]', u's\_\_gnavus']  
 'l', u'o\_\_Actinomycetales', u'f\_\_Corynebacteriaceae', u'g\_\_Corynebacterium', u's\_\_']  
 :lostridiales', u'f\_\_Lachnospiraceae', u'g\_\_', u's\_\_']  
 >bacteria', u'o\_\_Enterobacteriales', u'f\_\_Enterobacteriaceae', u'g\_\_', u's\_\_']  
 >bacteria', u'o\_\_Pseudomonadales', u'f\_\_Moraxellaceae', u'g\_\_Acinetobacter', u's\_\_rhizosphaerae']  
 :lostridiales', u'f\_\_Lachnospiraceae', u'g\_\_Blautia', u's\_\_']  
 >bacteria', u'o\_\_Pseudomonadales', u'f\_\_Pseudomonadaceae', u'g\_\_Pseudomonas', u's\_\_']  
 lales', u'f\_\_Planococcaceae', u'g\_\_', u's\_\_']  
 :lostridiales', u'f\_\_Lachnospiraceae']  
 >bacillales', u'f\_\_Streptococcaceae', u'g\_\_Streptococcus', u's\_\_']  
 :lostridiales', u'f\_\_Lachnospiraceae', u'g\_\_', u's\_\_']  
 >bacillales', u'f\_\_Streptococcaceae', u'g\_\_Streptococcus', u's\_\_']  
 'o\_\_Bacteroidales', u'f\_\_Bacteroidaceae', u'g\_\_Bacteroides', u's\_\_']  
 'o\_\_Cytophagales', u'f\_\_Cytophagaceae', u'g\_\_Hymenobacter', u's\_\_']  
 :lostridiales', u'f\_\_Lachnospiraceae', u'g\_\_Blautia']  
 >bacteria', u'o\_\_Pseudomonadales', u'f\_\_Moraxellaceae', u'g\_\_Moraxella', u's\_\_']  
 :lostridiales', u'f\_\_Lachnospiraceae', u'g\_\_', u's\_\_']  
 :lostridiales', u'f\_\_Lachnospiraceae', u'g\_\_[Ruminococcus]', u's\_\_gnavus']  
 >bacteria', u'o\_\_Enterobacteriales', u'f\_\_Enterobacteriaceae', u'g\_\_', u's\_\_']  
 >bacteria', u'o\_\_Enterobacteriales', u'f\_\_Enterobacteriaceae', u'g\_\_', u's\_\_']  
 'o\_\_Bacteroidales', u'f\_\_Bacteroidaceae', u'g\_\_Bacteroides', u's\_\_']  
 :lostridiales', u'f\_\_Veillonellaceae', u'g\_\_Veillonella', u's\_\_dispar']  
 :lostridiales', u'f\_\_[Tissierellaceae]', u'g\_\_Anaerococcus', u's\_\_']  
 >bacillales', u'f\_\_Streptococcaceae', u'g\_\_Streptococcus', u's\_\_']  
 'l', u'o\_\_Actinomycetales', u'f\_\_Corynebacteriaceae', u'g\_\_Corynebacterium', u's\_\_']  
 >bacillales', u'f\_\_Streptococcaceae', u'g\_\_Streptococcus', u's\_\_']  
 :lostridiales', u'f\_\_Veillonellaceae', u'g\_\_Veillonella', u's\_\_']  
 >bacillales', u'f\_\_Streptococcaceae', u'g\_\_Streptococcus', u's\_\_']  
 lales', u'f\_\_Staphylococcaceae', u'g\_\_Staphylococcus']  
 'l', u'o\_\_Actinomycetales', u'f\_\_Corynebacteriaceae', u'g\_\_Corynebacterium', u's\_\_']  
 'l', u'o\_\_Actinomycetales', u'f\_\_Corynebacteriaceae', u'g\_\_Corynebacterium', u's\_\_']  
 'l', u'o\_\_Actinomycetales', u'f\_\_Corynebacteriaceae', u'g\_\_Corynebacterium', u's\_\_']  
 :lostridiales', u'f\_\_Lachnospiraceae', u'g\_\_', u's\_\_']  
 >bacteria', u'o\_\_Enterobacteriales', u'f\_\_Enterobacteriaceae', u'g\_\_', u's\_\_']  
 :lostridiales', u'f\_\_Lachnospiraceae', u'g\_\_Dorea', u's\_\_']  
 >bacteria', u'o\_\_Enterobacteriales', u'f\_\_Enterobacteriaceae', u'g\_\_', u's\_\_']  
 >bacillales', u'f\_\_Streptococcaceae', u'g\_\_Streptococcus', u's\_\_']  
 'l', u'o\_\_Bifidobacteriales', u'f\_\_Bifidobacteriaceae', u'g\_\_Bifidobacterium', u's\_\_adolescentis']



' , u'o\_\_Coriobacteriales', u'f\_\_Coriobacteriaceae', u'g\_\_Collinsella', u's\_\_aerofaciens']  
 >bacteria', u'o\_\_Enterobacteriales', u'f\_\_Enterobacteriaceae', u'g\_\_', u's\_\_']  
 'o\_\_Bacteroidales', u'f\_\_Porphyromonadaceae', u'g\_\_Parabacteroides', u's\_\_distasonis']  
 ' , u'o\_\_Bifidobacteriales', u'f\_\_Bifidobacteriaceae', u'g\_\_Bifidobacterium']  
 :lostridiales', u'f\_\_Lachnospiraceae', u'g\_\_[Ruminococcus]', u's\_\_']  
 >bacillales', u'f\_\_Streptococcaceae', u'g\_\_Streptococcus', u's\_\_']  
 :lostridiales', u'f\_\_Lachnospiraceae', u'g\_\_[Ruminococcus]', u's\_\_gnavus']  
 ' , u'o\_\_Actinomycetales', u'f\_\_Corynebacteriaceae', u'g\_\_Corynebacterium', u's\_\_']  
 lales', u'f\_\_Staphylococcaceae', u'g\_\_Staphylococcus', u's\_\_']  
 :lostridiales', u'f\_\_Veillonellaceae', u'g\_\_Veillonella', u's\_\_']  
 ' , u'o\_\_Actinomycetales', u'f\_\_Corynebacteriaceae', u'g\_\_Corynebacterium', u's\_\_']  
 >bacillales', u'f\_\_Streptococcaceae', u'g\_\_Streptococcus', u's\_\_']  
 'o\_\_Bacteroidales', u'f\_\_Porphyromonadaceae', u'g\_\_Parabacteroides', u's\_\_distasonis']  
 :lostridiales', u'f\_\_Veillonellaceae', u'g\_\_Megasphaera', u's\_\_']  
 :lostridiales', u'f\_\_Lachnospiraceae', u'g\_\_[Ruminococcus]', u's\_\_']  
 ' , u'o\_\_Actinomycetales', u'f\_\_Corynebacteriaceae', u'g\_\_Corynebacterium', u's\_\_']  
 >bacillales', u'f\_\_Streptococcaceae', u'g\_\_Streptococcus', u's\_\_']  
 :lostridiales', u'f\_\_Clostridiaceae', u'g\_\_Clostridium', u's\_\_']  
 ' , u'o\_\_Bifidobacteriales', u'f\_\_Bifidobacteriaceae', u'g\_\_Bifidobacterium', u's\_\_']  
 >bacteria', u'o\_\_Enterobacteriales', u'f\_\_Enterobacteriaceae', u'g\_\_', u's\_\_']  
 >bacteria', u'o\_\_Pseudomonadales', u'f\_\_Moraxellaceae', u'g\_\_', u's\_\_']  
 >bacillales', u'f\_\_Streptococcaceae', u'g\_\_Streptococcus', u's\_\_']  
 'o\_\_Bacteroidales', u'f\_\_Bacteroidaceae', u'g\_\_Bacteroides', u's\_\_caccae']  
 >bacteria', u'o\_\_Pseudomonadales', u'f\_\_Moraxellaceae', u'g\_\_', u's\_\_']  
 's\_\_']  
 >bacillales', u'f\_\_Lactobacillaceae', u'g\_\_Lactobacillus', u's\_\_iners']  
 >bacteria', u'o\_\_Enterobacteriales', u'f\_\_Enterobacteriaceae', u'g\_\_', u's\_\_']  
 >bacteria', u'o\_\_Pseudomonadales', u'f\_\_Moraxellaceae', u'g\_\_Moraxella', u's\_\_']  
 >bacteria', u'o\_\_Enterobacteriales', u'f\_\_Enterobacteriaceae', u'g\_\_', u's\_\_']  
 :lostridiales', u'f\_\_Lachnospiraceae', u'g\_\_Blautia', u's\_\_producta']  
 >bacteria', u'o\_\_Xanthomonadales', u'f\_\_Xanthomonadaceae', u'g\_\_Lysobacter', u's\_\_']  
 ' , u'o\_\_Coriobacteriales', u'f\_\_Coriobacteriaceae', u'g\_\_Collinsella', u's\_\_aerofaciens']  
 >bacillales', u'f\_\_Streptococcaceae', u'g\_\_Streptococcus', u's\_\_']  
 >bacillales', u'f\_\_Streptococcaceae', u'g\_\_Streptococcus', u's\_\_infantis']  
 >bacteria', u'o\_\_Enterobacteriales', u'f\_\_Enterobacteriaceae', u'g\_\_', u's\_\_']  
 >bacillales', u'f\_\_Streptococcaceae', u'g\_\_Streptococcus', u's\_\_']  
 >bacillales', u'f\_\_Streptococcaceae', u'g\_\_Streptococcus', u's\_\_']  
 >bacillales', u'f\_\_Enterococcaceae', u'g\_\_Enterococcus']  
 >bacillales', u'f\_\_Streptococcaceae', u'g\_\_Streptococcus', u's\_\_']  
 ' , u'o\_\_Bifidobacteriales', u'f\_\_Bifidobacteriaceae', u'g\_\_Bifidobacterium', u's\_\_']  
 ' , u'o\_\_Bifidobacteriales', u'f\_\_Bifidobacteriaceae', u'g\_\_Bifidobacterium', u's\_\_']  
 >bacteria', u'o\_\_Enterobacteriales', u'f\_\_Enterobacteriaceae', u'g\_\_', u's\_\_']  
 :lostridiales', u'f\_\_Clostridiaceae', u'g\_\_', u's\_\_']  
 ' , u'o\_\_Bifidobacteriales', u'f\_\_Bifidobacteriaceae', u'g\_\_Bifidobacterium', u's\_\_adolescentis']  
 >bacillales', u'f\_\_Streptococcaceae', u'g\_\_Streptococcus', u's\_\_']  
 >bacteria', u'o\_\_Enterobacteriales', u'f\_\_Enterobacteriaceae']  
 ' , u'o\_\_Actinomycetales', u'f\_\_Corynebacteriaceae', u'g\_\_Corynebacterium', u's\_\_']  
 >bacteria', u'o\_\_Xanthomonadales', u'f\_\_Xanthomonadaceae', u'g\_\_Lysobacter', u's\_\_']  
 >bacteria', u'o\_\_Enterobacteriales', u'f\_\_Enterobacteriaceae', u'g\_\_', u's\_\_']  
 :lostridiales', u'f\_\_Lachnospiraceae', u'g\_\_[Ruminococcus]', u's\_\_']  
 ' , u'o\_\_Actinomycetales', u'f\_\_Corynebacteriaceae', u'g\_\_Corynebacterium', u's\_\_']  
 >bacillales', u'f\_\_Streptococcaceae', u'g\_\_Streptococcus', u's\_\_']  
 >bacillales', u'f\_\_Streptococcaceae', u'g\_\_Streptococcus', u's\_\_']  
 >bacillales', u'f\_\_Streptococcaceae', u'g\_\_Streptococcus', u's\_\_']  
 ' , u'o\_\_Bifidobacteriales', u'f\_\_Bifidobacteriaceae', u'g\_\_Bifidobacterium', u's\_\_']  
 :lostridiales', u'f\_\_Lachnospiraceae', u'g\_\_', u's\_\_']

:lostridiales', u'f\_\_Clostridiaceae', u'g\_\_', u's\_\_']  
 >bacillales', u'f\_\_Streptococcaceae', u'g\_\_Streptococcus', u's\_\_']  
 'o\_\_Bacteroidales', u'f\_\_Bacteroidaceae', u'g\_\_Bacteroides', u's\_\_']  
 'l', u'o\_\_Actinomycetales', u'f\_\_Corynebacteriaceae', u'g\_\_Corynebacterium', u's\_\_']  
 'l', u'o\_\_Actinomycetales', u'f\_\_Corynebacteriaceae', u'g\_\_Corynebacterium', u's\_\_']  
 >bacillales', u'f\_\_Streptococcaceae', u'g\_\_Streptococcus', u's\_\_']  
 >bacillales', u'f\_\_Streptococcaceae', u'g\_\_Streptococcus', u's\_\_']  
 lales', u'f\_\_Staphylococcaceae', u'g\_\_Staphylococcus', u's\_\_aureus']  
 lales', u'f\_\_Staphylococcaceae', u'g\_\_Staphylococcus', u's\_\_aureus']  
 >bacillales', u'f\_\_Streptococcaceae', u'g\_\_Streptococcus', u's\_\_']  
 cteria', u'o\_\_Neisseriales', u'f\_\_Neisseriaceae', u'g\_\_', u's\_\_']  
 'o\_\_Bacteroidales', u'f\_\_Porphyromonadaceae', u'g\_\_Parabacteroides', u's\_\_']  
 'o\_\_Bacteroidales', u'f\_\_Bacteroidaceae', u'g\_\_Bacteroides', u's\_\_']  
 >bacillales', u'f\_\_Streptococcaceae', u'g\_\_Streptococcus', u's\_\_']  
 >bacillales', u'f\_\_Streptococcaceae', u'g\_\_Streptococcus', u's\_\_']  
 :lostridiales', u'f\_\_Clostridiaceae', u'g\_\_Clostridium', u's\_\_']  
 'o\_\_Bacteroidales', u'f\_\_Bacteroidaceae', u'g\_\_Bacteroides', u's\_\_']  
 >bacteria', u'o\_\_Pseudomonadales', u'f\_\_Moraxellaceae', u'g\_\_Moraxella', u's\_\_']  
 >bacteria', u'o\_\_Pasteurellales', u'f\_\_Pasteurellaceae', u'g\_\_Haemophilus', u's\_\_']  
 >bacillales', u'f\_\_Streptococcaceae', u'g\_\_Streptococcus', u's\_\_']  
 'o\_\_Bacteroidales', u'f\_\_Bacteroidaceae', u'g\_\_Bacteroides', u's\_\_caccae']  
 >bacteria', u'o\_\_Enterobacteriales', u'f\_\_Enterobacteriaceae', u'g\_\_', u's\_\_']  
 >bacillales', u'f\_\_Streptococcaceae', u'g\_\_Streptococcus', u's\_\_infantis']  
 :lostridiales', u'f\_\_Lachnospiraceae']  
 lales', u'f\_\_Staphylococcaceae', u'g\_\_Staphylococcus', u's\_\_']  
 cteria', u'o\_\_Burkholderiales', u'f\_\_Alcaligenaceae', u'g\_\_Sutterella', u's\_\_']  
 :lostridiales', u'f\_\_Lachnospiraceae', u'g\_\_Coprococcus', u's\_\_']  
 einococcales', u'f\_\_Deinococcaceae', u'g\_\_Deinococcus', u's\_\_']  
 >bacillales', u'f\_\_Streptococcaceae', u'g\_\_Streptococcus', u's\_\_']  
 >bacillales', u'f\_\_Streptococcaceae', u'g\_\_Streptococcus', u's\_\_']  
 cteria', u'o\_\_Neisseriales', u'f\_\_Neisseriaceae', u'g\_\_', u's\_\_']  
 cteria', u'o\_\_Burkholderiales', u'f\_\_Comamonadaceae', u'g\_\_', u's\_\_']  
 >bacillales', u'f\_\_Streptococcaceae', u'g\_\_Streptococcus', u's\_\_']  
 'o\_\_Bacteroidales', u'f\_\_Bacteroidaceae', u'g\_\_Bacteroides', u's\_\_ovatus']  
 >bacillales', u'f\_\_Streptococcaceae', u'g\_\_Streptococcus', u's\_\_']  
 >bacillales', u'f\_\_Streptococcaceae', u'g\_\_Streptococcus', u's\_\_']  
 :lostridiales', u'f\_\_Clostridiaceae', u'g\_\_', u's\_\_']  
 cteria', u'o\_\_Neisseriales', u'f\_\_Neisseriaceae', u'g\_\_', u's\_\_']  
 >bacillales', u'f\_\_Streptococcaceae', u'g\_\_Streptococcus', u's\_\_']  
 'o\_\_Bacteroidales', u'f\_\_Bacteroidaceae', u'g\_\_Bacteroides', u's\_\_']  
 >bacillales', u'f\_\_Enterococcaceae']  
 :lostridiales', u'f\_\_Lachnospiraceae']  
 :lostridiales', u'f\_\_Veillonellaceae', u'g\_\_Veillonella', u's\_\_dispar']  
 >bacillales', u'f\_\_Streptococcaceae', u'g\_\_Streptococcus', u's\_\_infantis']  
 >bacillales', u'f\_\_Streptococcaceae', u'g\_\_Streptococcus', u's\_\_']  
 'l', u'o\_\_Actinomycetales', u'f\_\_Corynebacteriaceae', u'g\_\_Corynebacterium', u's\_\_']  
 >bacillales', u'f\_\_Streptococcaceae', u'g\_\_Streptococcus', u's\_\_']  
 >bacteria', u'o\_\_Enterobacteriales', u'f\_\_Enterobacteriaceae', u'g\_\_Citrobacter', u's\_\_']  
 >bacillales', u'f\_\_Streptococcaceae', u'g\_\_Streptococcus', u's\_\_']  
 :lostridiales', u'f\_\_Ruminococcaceae', u'g\_\_Faecalibacterium', u's\_\_prausnitzii']  
 cteria', u'o\_\_Burkholderiales', u'f\_\_Comamonadaceae']  
 >bacillales', u'f\_\_Streptococcaceae', u'g\_\_Streptococcus', u's\_\_']  
 :lostridiales']  
 'o\_\_Bacteroidales', u'f\_\_Porphyromonadaceae', u'g\_\_Parabacteroides', u's\_\_distasonis']  
 'l', u'o\_\_Bifidobacteriales', u'f\_\_Bifidobacteriaceae', u'g\_\_Bifidobacterium', u's\_\_longum']  
 >bacillales', u'f\_\_Streptococcaceae', u'g\_\_Streptococcus', u's\_\_']

i', u'o\_\_Actinomycetales', u'f\_\_Corynebacteriaceae', u'g\_\_Corynebacterium', u's\_\_']  
 ]bacteria', u'o\_\_Enterobacteriales', u'f\_\_Enterobacteriaceae', u'g\_\_', u's\_\_']  
 cteria', u'o\_\_Burkholderiales', u'f\_\_Oxalobacteraceae', u'g\_\_', u's\_\_']  
 i', u'o\_\_Bifidobacteriales', u'f\_\_Bifidobacteriaceae', u'g\_\_Bifidobacterium']  
 ]bacillales', u'f\_\_Streptococcaceae', u'g\_\_Streptococcus', u's\_\_']  
 'o\_\_Bacteroidales', u'f\_\_Bacteroidaceae', u'g\_\_Bacteroides', u's\_\_fragilis']  
 :lostridiales', u'f\_\_Veillonellaceae', u'g\_\_Veillonella', u's\_\_dispar']  
 ]bacteria', u'o\_\_Pasteurellales', u'f\_\_Pasteurellaceae', u'g\_\_Haemophilus', u's\_\_']  
 i', u'o\_\_Actinomycetales', u'f\_\_Corynebacteriaceae', u'g\_\_Corynebacterium', u's\_\_']  
 :lostridiales', u'f\_\_Veillonellaceae', u'g\_\_Megamonas', u's\_\_']  
 ]bacteria', u'o\_\_Pasteurellales', u'f\_\_Pasteurellaceae', u'g\_\_Haemophilus', u's\_\_']  
 'obiae', u'o\_\_Verrucomicrobiales', u'f\_\_Verrucomicrobiaceae', u'g\_\_Akkermansia', u's\_\_muciniphila']  
 ]bacillales', u'f\_\_Streptococcaceae', u'g\_\_Streptococcus', u's\_\_']  
 ]bacillales', u'f\_\_Streptococcaceae', u'g\_\_Streptococcus', u's\_\_']  
 ]bacillales', u'f\_\_Streptococcaceae', u'g\_\_Streptococcus', u's\_\_']  
 ]bacillales', u'f\_\_Streptococcaceae', u'g\_\_Streptococcus', u's\_\_']  
 'o\_\_Bacteroidales', u'f\_\_Porphyromonadaceae', u'g\_\_Dysgonomonas', u's\_\_']  
 ]bacillales', u'f\_\_Streptococcaceae', u'g\_\_Streptococcus', u's\_\_']  
 acteria', u'o\_\_Rhizobiales', u'f\_\_Phyllobacteriaceae', u'g\_\_Phyllobacterium', u's\_\_']  
 i', u'o\_\_Bifidobacteriales', u'f\_\_Bifidobacteriaceae', u'g\_\_Bifidobacterium', u's\_\_']  
 ]bacteria', u'o\_\_Enterobacteriales', u'f\_\_Enterobacteriaceae', u'g\_\_', u's\_\_']  
 'obiae', u'o\_\_Verrucomicrobiales', u'f\_\_Verrucomicrobiaceae', u'g\_\_Akkermansia', u's\_\_muciniphila']  
 cteria', u'o\_\_Burkholderiales', u'f\_\_Oxalobacteraceae', u'g\_\_', u's\_\_']  
 ]bacteria', u'o\_\_Enterobacteriales', u'f\_\_Enterobacteriaceae', u'g\_\_', u's\_\_']  
 i', u'o\_\_Actinomycetales', u'f\_\_Corynebacteriaceae', u'g\_\_Corynebacterium', u's\_\_']  
 ]bacillales', u'f\_\_Streptococcaceae', u'g\_\_Streptococcus', u's\_\_infantis']  
 :lostridiales', u'f\_\_Veillonellaceae', u'g\_\_Veillonella', u's\_\_']  
 :lostridiales', u'f\_\_Lachnospiraceae', u'g\_\_', u's\_\_']  
 :lostridiales', u'f\_\_', u'g\_\_', u's\_\_']  
 ]bacillales', u'f\_\_Streptococcaceae', u'g\_\_Streptococcus', u's\_\_']  
 :lostridiales', u'f\_\_Lachnospiraceae', u'g\_\_', u's\_\_']  
 :lostridiales', u'f\_\_Lachnospiraceae', u'g\_\_Coprococcus', u's\_\_']  
 ]bacillales', u'f\_\_Streptococcaceae', u'g\_\_Streptococcus', u's\_\_']  
 :lostridiales', u'f\_\_Eubacteriaceae', u'g\_\_Pseudoramibacter\_Eubacterium', u's\_\_']  
 :lostridiales', u'f\_\_', u'g\_\_', u's\_\_']  
 ]bacteria', u'o\_\_Pasteurellales', u'f\_\_Pasteurellaceae', u'g\_\_Haemophilus', u's\_\_influenzae']  
 ]bacillales', u'f\_\_Streptococcaceae', u'g\_\_Streptococcus', u's\_\_']  
 i', u'o\_\_Actinomycetales', u'f\_\_Corynebacteriaceae', u'g\_\_Corynebacterium', u's\_\_']  
 :lostridiales', u'f\_\_Lachnospiraceae', u'g\_\_', u's\_\_']  
 cteria', u'o\_\_Neisseriales', u'f\_\_Neisseriaceae', u'g\_\_', u's\_\_']  
 ]bacteria', u'o\_\_Enterobacteriales', u'f\_\_Enterobacteriaceae', u'g\_\_', u's\_\_']  
 ]bacillales', u'f\_\_Aerococcaceae', u'g\_\_Alloiococcus', u's\_\_']  
 ]bacillales', u'f\_\_Streptococcaceae', u'g\_\_Streptococcus', u's\_\_']  
 ]bacteria', u'o\_\_Enterobacteriales', u'f\_\_Enterobacteriaceae', u'g\_\_', u's\_\_']  
 'o\_\_Bacteroidales', u'f\_\_Porphyromonadaceae', u'g\_\_Parabacteroides', u's\_\_distasonis']  
 ]bacillales', u'f\_\_Streptococcaceae', u'g\_\_Streptococcus', u's\_\_']  
 'o\_\_Bacteroidales', u'f\_\_Bacteroidaceae', u'g\_\_Bacteroides', u's\_\_']  
 cteria']  
 :lostridiales', u'f\_\_Ruminococcaceae', u'g\_\_', u's\_\_']  
 ]bacillales', u'f\_\_Streptococcaceae', u'g\_\_Streptococcus', u's\_\_']  
 ]bacteria', u'o\_\_Enterobacteriales', u'f\_\_Enterobacteriaceae', u'g\_\_', u's\_\_']  
 'o\_\_Bacteroidales', u'f\_\_Bacteroidaceae', u'g\_\_Bacteroides', u's\_\_']  
 ]bacteria', u'o\_\_Enterobacteriales', u'f\_\_Enterobacteriaceae', u'g\_\_', u's\_\_']  
 ]bacteria', u'o\_\_Enterobacteriales', u'f\_\_Enterobacteriaceae', u'g\_\_', u's\_\_']  
 :lostridiales']  
 ]bacillales', u'f\_\_Streptococcaceae', u'g\_\_Streptococcus', u's\_\_']

'o\_\_Bacteroidales', u'f\_\_Porphyromonadaceae', u'g\_\_Parabacteroides', u's\_\_distasonis']  
>bacillales', u'f\_\_Streptococcaceae', u'g\_\_Streptococcus', u's\_\_']  
'o\_\_Bacteroidales', u'f\_\_Porphyromonadaceae', u'g\_\_Parabacteroides', u's\_\_distasonis']  
>bacillales', u'f\_\_Streptococcaceae', u'g\_\_Streptococcus', u's\_\_']  
:lostridiales', u'f\_\_Veillonellaceae', u'g\_\_Veillonella', u's\_\_parvula']  
:lostridiales', u'f\_\_Lachnospiraceae', u'g\_\_Epulopiscium', u's\_\_']  
>bacillales', u'f\_\_Streptococcaceae', u'g\_\_Streptococcus', u's\_\_']  
i', u'o\_\_Bifidobacteriales', u'f\_\_Bifidobacteriaceae', u'g\_\_Bifidobacterium', u's\_\_adolescentis']  
:lostridiales', u'f\_\_Lachnospiraceae', u'g\_\_Dorea', u's\_\_']  
>bacillales', u'f\_\_Streptococcaceae', u'g\_\_Streptococcus', u's\_\_']  
>bacillales', u'f\_\_Streptococcaceae', u'g\_\_Streptococcus', u's\_\_']  
cteria', u'o\_\_Burkholderiales', u'f\_\_Comamonadaceae']  
i', u'o\_\_Bifidobacteriales', u'f\_\_Bifidobacteriaceae', u'g\_\_Bifidobacterium', u's\_\_adolescentis']  
>bacillales', u'f\_\_Streptococcaceae', u'g\_\_Streptococcus', u's\_\_']  
cteria', u'o\_\_Burkholderiales', u'f\_\_Oxalobacteraceae', u'g\_\_', u's\_\_']  
i', u'o\_\_Actinomycetales', u'f\_\_Nocardoidaceae', u'g\_\_', u's\_\_']  
:lostridiales', u'f\_\_Lachnospiraceae', u'g\_\_[Ruminococcus]', u's\_\_gnavus']  
:lostridiales', u'f\_\_Lachnospiraceae', u'g\_\_Coprococcus', u's\_\_']  
>bacillales', u'f\_\_Streptococcaceae', u'g\_\_Streptococcus', u's\_\_']  
i', u'o\_\_Actinomycetales', u'f\_\_Corynebacteriaceae', u'g\_\_Corynebacterium', u's\_\_']  
i', u'o\_\_Actinomycetales', u'f\_\_Corynebacteriaceae', u'g\_\_Corynebacterium', u's\_\_']  
>bacillales', u'f\_\_Streptococcaceae', u'g\_\_Streptococcus', u's\_\_']  
>bacillales', u'f\_\_Streptococcaceae', u'g\_\_Streptococcus', u's\_\_']  
'o\_\_Bacteroidales', u'f\_\_Bacteroidaceae', u'g\_\_Bacteroides', u's\_\_']  
:lostridiales', u'f\_\_Veillonellaceae', u'g\_\_Veillonella', u's\_\_']  
>bacillales', u'f\_\_Enterococcaceae', u'g\_\_Enterococcus', u's\_\_']  
:lostridiales', u'f\_\_Lachnospiraceae', u'g\_\_', u's\_\_']  
>bacteria', u'o\_\_Pseudomonadales', u'f\_\_Moraxellaceae', u'g\_\_Acinetobacter', u's\_\_']  
:lostridiales', u'f\_\_Veillonellaceae', u'g\_\_Veillonella', u's\_\_parvula']  
:lostridiales', u'f\_\_Veillonellaceae', u'g\_\_Veillonella', u's\_\_dispar']  
>bacillales', u'f\_\_Aerococcaceae', u'g\_\_Alloiococcus', u's\_\_']  
>bacillales', u'f\_\_Enterococcaceae', u'g\_\_Enterococcus']  
:lostridiales', u'f\_\_Veillonellaceae', u'g\_\_Veillonella', u's\_\_']  
', u'o\_\_Coriobacteriales', u'f\_\_Coriobacteriaceae', u'g\_\_Collinsella', u's\_\_aerofaciens']  
>bacillales', u'f\_\_Streptococcaceae', u'g\_\_Streptococcus', u's\_\_']  
i', u'o\_\_Actinomycetales', u'f\_\_Corynebacteriaceae', u'g\_\_Corynebacterium', u's\_\_']  
>bacteria', u'o\_\_Enterobacteriales', u'f\_\_Enterobacteriaceae', u'g\_\_', u's\_\_']  
>bacteria', u'o\_\_Enterobacteriales', u'f\_\_Enterobacteriaceae', u'g\_\_', u's\_\_']  
:lostridiales', u'f\_\_Lachnospiraceae', u'g\_\_Blautia', u's\_\_']  
>bacillales', u'f\_\_Streptococcaceae', u'g\_\_Streptococcus', u's\_\_']  
>bacillales', u'f\_\_Streptococcaceae', u'g\_\_Streptococcus', u's\_\_']  
>bacillales', u'f\_\_Streptococcaceae', u'g\_\_Streptococcus', u's\_\_']  
>bacteria', u'o\_\_Enterobacteriales', u'f\_\_Enterobacteriaceae', u'g\_\_Erwinia', u's\_\_']  
:lostridiales', u'f\_\_', u'g\_\_', u's\_\_']  
'o\_\_Bacteroidales', u'f\_\_Bacteroidaceae', u'g\_\_Bacteroides', u's\_\_fragilis']  
acteria', u'o\_\_Caulobacterales', u'f\_\_Caulobacteraceae', u'g\_\_', u's\_\_']  
cteria', u'o\_\_Burkholderiales', u'f\_\_Alcaligenaceae', u'g\_\_Sutterella', u's\_\_']  
'o\_\_Bacteroidales', u'f\_\_Bacteroidaceae', u'g\_\_Bacteroides', u's\_\_']  
cteria', u'o\_\_Burkholderiales', u'f\_\_Comamonadaceae', u'g\_\_', u's\_\_']  
i', u'o\_\_Bifidobacteriales', u'f\_\_Bifidobacteriaceae', u'g\_\_Bifidobacterium', u's\_\_']  
>bacillales', u'f\_\_Streptococcaceae', u'g\_\_Streptococcus', u's\_\_']  
:lostridiales', u'f\_\_Lachnospiraceae', u'g\_\_Blautia', u's\_\_']  
>bacillales', u'f\_\_Streptococcaceae', u'g\_\_Streptococcus', u's\_\_']  
:lostridiales', u'f\_\_Veillonellaceae', u'g\_\_Veillonella', u's\_\_']  
>bacillales', u'f\_\_Streptococcaceae', u'g\_\_Streptococcus', u's\_\_']  
i', u'o\_\_Bifidobacteriales', u'f\_\_Bifidobacteriaceae', u'g\_\_Bifidobacterium']

i', u'o\_\_Bifidobacteriales', u'f\_\_Bifidobacteriaceae', u'g\_\_Bifidobacterium', u's\_\_']  
 'o\_\_Bacteroidales', u'f\_\_Porphyromonadaceae', u'g\_\_Parabacteroides', u's\_\_']  
 >bacteria', u'o\_\_Enterobacteriales', u'f\_\_Enterobacteriaceae', u'g\_\_', u's\_\_']  
 i', u'o\_\_Actinomycetales', u'f\_\_Nocardioideaceae', u'g\_\_', u's\_\_']  
 >bacillales', u'f\_\_Streptococcaceae', u'g\_\_Streptococcus', u's\_\_']  
 :lostridiales', u'f\_\_Clostridiaceae']  
 >bacteria', u'o\_\_Enterobacteriales', u'f\_\_Enterobacteriaceae', u'g\_\_', u's\_\_']  
 'o\_\_Bacteroidales', u'f\_\_Bacteroidaceae', u'g\_\_Bacteroides', u's\_\_']  
 >bacteria', u'o\_\_Pseudomonadales', u'f\_\_Moraxellaceae', u'g\_\_Moraxella', u's\_\_']  
 >bacteria', u'o\_\_Pasteurellales', u'f\_\_Pasteurellaceae', u'g\_\_Haemophilus', u's\_\_']  
 :lostridiales', u'f\_\_Lachnospiraceae', u'g\_\_', u's\_\_']  
 i', u'o\_\_Bifidobacteriales', u'f\_\_Bifidobacteriaceae', u'g\_\_Bifidobacterium']  
 >bacillales', u'f\_\_Streptococcaceae', u'g\_\_Streptococcus', u's\_\_']  
 :lostridiales', u'f\_\_Lachnospiraceae', u'g\_\_[Ruminococcus]', u's\_\_gnavus']  
 >bacillales', u'f\_\_Streptococcaceae', u'g\_\_Streptococcus', u's\_\_']  
 >bacteria', u'o\_\_Enterobacteriales', u'f\_\_Enterobacteriaceae', u'g\_\_', u's\_\_']  
 'o\_\_Bacteroidales', u'f\_\_Bacteroidaceae', u'g\_\_Bacteroides', u's\_\_fragilis']  
 >bacillales', u'f\_\_Streptococcaceae', u'g\_\_Streptococcus']  
 cteria', u'o\_\_Burkholderiales', u'f\_\_Comamonadaceae', u'g\_\_Delftia', u's\_\_']  
 >bacteria', u'o\_\_Enterobacteriales', u'f\_\_Enterobacteriaceae', u'g\_\_', u's\_\_']  
 acteria', u'o\_\_Rhizobiales', u'f\_\_Phyllobacteriaceae', u'g\_\_Phyllobacterium', u's\_\_']  
 acteria', u'o\_\_Rhodobacterales', u'f\_\_Rhodobacteraceae', u'g\_\_Paracoccus', u's\_\_aminovorans']  
 >bacillales', u'f\_\_Streptococcaceae', u'g\_\_Streptococcus', u's\_\_']  
 :lostridiales', u'f\_\_Lachnospiraceae', u'g\_\_', u's\_\_']  
 i', u'o\_\_Actinomycetales', u'f\_\_Nocardioideaceae', u'g\_\_', u's\_\_']  
 lales']  
 cteria', u'o\_\_Burkholderiales', u'f\_\_Comamonadaceae']  
 cteria', u'o\_\_Burkholderiales', u'f\_\_Comamonadaceae', u'g\_\_', u's\_\_']  
 cteria', u'o\_\_Burkholderiales', u'f\_\_Comamonadaceae', u'g\_\_', u's\_\_']  
 :lostridiales', u'f\_\_Clostridiaceae', u'g\_\_', u's\_\_']  
 >bacillales', u'f\_\_Streptococcaceae', u'g\_\_Streptococcus', u's\_\_']  
 :lostridiales', u'f\_\_Clostridiaceae', u'g\_\_', u's\_\_']  
 >bacillales', u'f\_\_Streptococcaceae', u'g\_\_Streptococcus', u's\_\_']  
 i', u'o\_\_Actinomycetales', u'f\_\_Corynebacteriaceae', u'g\_\_Corynebacterium', u's\_\_']  
 >bacillales', u'f\_\_Streptococcaceae', u'g\_\_Streptococcus', u's\_\_']  
 >bacteria', u'o\_\_Pasteurellales', u'f\_\_Pasteurellaceae', u'g\_\_Haemophilus', u's\_\_']  
 >bacteria', u'o\_\_Enterobacteriales', u'f\_\_Enterobacteriaceae', u'g\_\_', u's\_\_']  
 >bacillales', u'f\_\_Streptococcaceae', u'g\_\_Streptococcus', u's\_\_']  
 :lostridiales', u'f\_\_Lachnospiraceae', u'g\_\_[Ruminococcus]', u's\_\_gnavus']  
 i', u'o\_\_Actinomycetales', u'f\_\_Corynebacteriaceae', u'g\_\_Corynebacterium', u's\_\_']  
 i', u'o\_\_Bifidobacteriales', u'f\_\_Bifidobacteriaceae', u'g\_\_Bifidobacterium']  
 >bacillales', u'f\_\_Streptococcaceae', u'g\_\_Streptococcus', u's\_\_infantis']  
 >bacillales', u'f\_\_Streptococcaceae', u'g\_\_Streptococcus', u's\_\_']  
 >bacillales', u'f\_\_Streptococcaceae', u'g\_\_Streptococcus', u's\_\_infantis']  
 'o\_\_Bacteroidales', u'f\_\_Porphyromonadaceae', u'g\_\_Dysgonomonas', u's\_\_']  
 >bacteria', u'o\_\_Pasteurellales', u'f\_\_Pasteurellaceae', u'g\_\_Haemophilus', u's\_\_']  
 'o\_\_Bacteroidales', u'f\_\_Bacteroidaceae', u'g\_\_Bacteroides', u's\_\_ovatus']  
 >bacillales', u'f\_\_Streptococcaceae', u'g\_\_Streptococcus', u's\_\_']  
 :lostridiales', u'f\_\_Veillonellaceae', u'g\_\_Veillonella', u's\_\_']  
 >bacillales', u'f\_\_Aerococcaceae', u'g\_\_Alloiococcus', u's\_\_']  
 >bacteria', u'o\_\_Enterobacteriales', u'f\_\_Enterobacteriaceae', u'g\_\_', u's\_\_']  
 ', u'o\_\_Coriobacteriales', u'f\_\_Coriobacteriaceae', u'g\_\_Collinsella', u's\_\_aerofaciens']  
 >bacteria', u'o\_\_Pseudomonadales', u'f\_\_Pseudomonadaceae', u'g\_\_Pseudomonas', u's\_\_']  
 ellales', u'f\_\_Gemellaceae', u'g\_\_', u's\_\_']  
 'obiae', u'o\_\_Verrucomicrobiales', u'f\_\_Verrucomicrobiaceae', u'g\_\_Akkermansia', u's\_\_muciniphila']  
 >bacillales', u'f\_\_Aerococcaceae', u'g\_\_Alloiococcus', u's\_\_']

'o\_\_Bacteroidales', u'f\_\_Bacteroidaceae', u'g\_\_Bacteroides', u's\_\_']  
'o\_\_Bacteroidales', u'f\_\_Porphyromonadaceae', u'g\_\_Porphyromonas', u's\_\_']  
>bacillales', u'f\_\_Streptococcaceae', u'g\_\_Streptococcus', u's\_\_']  
'o\_\_Bacteroidales', u'f\_\_Bacteroidaceae', u'g\_\_Bacteroides', u's\_\_']  
>bacteria', u'o\_\_Enterobacteriales', u'f\_\_Enterobacteriaceae', u'g\_\_', u's\_\_']  
'o\_\_Bacteroidales', u'f\_\_Bacteroidaceae', u'g\_\_Bacteroides', u's\_\_']  
t', u'o\_\_Actinomycetales', u'f\_\_Nocardoidaceae', u'g\_\_', u's\_\_']  
>bacillales', u'f\_\_Streptococcaceae', u'g\_\_Streptococcus', u's\_\_']  
t', u'o\_\_Actinomycetales', u'f\_\_Corynebacteriaceae', u'g\_\_Corynebacterium', u's\_\_']  
t', u'o\_\_Actinomycetales', u'f\_\_Corynebacteriaceae', u'g\_\_Corynebacterium', u's\_\_']  
:lostridiales', u'f\_\_Veillonellaceae', u'g\_\_Veillonella', u's\_\_dispar']  
:lostridiales', u'f\_\_Lachnospiraceae', u'g\_\_', u's\_\_']  
'o\_\_Bacteroidales', u'f\_\_Porphyromonadaceae', u'g\_\_Parabacteroides', u's\_\_distasonis']  
'o\_\_Bacteroidales', u'f\_\_Prevotellaceae', u'g\_\_Prevotella', u's\_\_']  
>bacteria', u'o\_\_Enterobacteriales', u'f\_\_Enterobacteriaceae', u'g\_\_', u's\_\_']  
t', u'o\_\_Actinomycetales', u'f\_\_Nocardoidaceae', u'g\_\_', u's\_\_']  
'o\_\_Bacteroidales', u'f\_\_Porphyromonadaceae', u'g\_\_Parabacteroides', u's\_\_distasonis']  
>bacillales', u'f\_\_Streptococcaceae', u'g\_\_Streptococcus', u's\_\_']  
t', u'o\_\_Actinomycetales', u'f\_\_Corynebacteriaceae', u'g\_\_Corynebacterium', u's\_\_']  
>bacillales', u'f\_\_Streptococcaceae', u'g\_\_Streptococcus', u's\_\_']  
>bacteria', u'o\_\_Enterobacteriales', u'f\_\_Enterobacteriaceae', u'g\_\_', u's\_\_']  
:lostridiales', u'f\_\_Clostridiaceae', u'g\_\_', u's\_\_']  
>bacillales', u'f\_\_Streptococcaceae', u'g\_\_Streptococcus', u's\_\_']  
:lostridiales', u'f\_\_Lachnospiraceae', u'g\_\_', u's\_\_']  
t', u'o\_\_Actinomycetales', u'f\_\_Corynebacteriaceae', u'g\_\_Corynebacterium', u's\_\_']  
:lostridiales', u'f\_\_Ruminococcaceae', u'g\_\_', u's\_\_']  
>bacillales', u'f\_\_Streptococcaceae', u'g\_\_Streptococcus', u's\_\_']  
>bacillales', u'f\_\_Streptococcaceae', u'g\_\_Streptococcus']  
>bacillales', u'f\_\_Streptococcaceae', u'g\_\_Streptococcus', u's\_\_']  
'o\_\_Bacteroidales', u'f\_\_Bacteroidaceae', u'g\_\_Bacteroides', u's\_\_fragilis']  
:lostridiales', u'f\_\_Lachnospiraceae', u'g\_\_Dorea', u's\_\_']  
>bacillales', u'f\_\_Streptococcaceae', u'g\_\_Streptococcus', u's\_\_']  
'o\_\_Bacteroidales', u'f\_\_Porphyromonadaceae', u'g\_\_Parabacteroides', u's\_\_distasonis']  
>bacillales', u'f\_\_Streptococcaceae', u'g\_\_Streptococcus', u's\_\_']  
>bacteria', u'o\_\_Enterobacteriales', u'f\_\_Enterobacteriaceae', u'g\_\_', u's\_\_']  
:lostridiales', u'f\_\_Lachnospiraceae']  
>bacteria', u'o\_\_Pseudomonadales', u'f\_\_Moraxellaceae', u'g\_\_Moraxella', u's\_\_']  
>bacillales', u'f\_\_Streptococcaceae', u'g\_\_Streptococcus', u's\_\_']  
t', u'o\_\_Actinomycetales', u'f\_\_Corynebacteriaceae', u'g\_\_Corynebacterium', u's\_\_']  
lales', u'f\_\_Planococcaceae', u'g\_\_', u's\_\_']  
t', u'o\_\_Actinomycetales', u'f\_\_Corynebacteriaceae', u'g\_\_Corynebacterium', u's\_\_']  
lales', u'f\_\_Staphylococcaceae', u'g\_\_Staphylococcus', u's\_\_']  
>bacillales', u'f\_\_Streptococcaceae', u'g\_\_Streptococcus', u's\_\_']  
:lostridiales', u'f\_\_Lachnospiraceae', u'g\_\_[Ruminococcus]', u's\_\_gnavus']  
:lostridiales', u'f\_\_Lachnospiraceae', u'g\_\_Blautia', u's\_\_']  
', u'o\_\_Coriobacteriales', u'f\_\_Coriobacteriaceae', u'g\_\_Eggerthella', u's\_\_lenta']  
:lostridiales', u'f\_\_Lachnospiraceae', u'g\_\_', u's\_\_']  
:lostridiales', u'f\_\_Ruminococcaceae', u'g\_\_', u's\_\_']  
t', u'o\_\_Bifidobacteriales', u'f\_\_Bifidobacteriaceae', u'g\_\_Bifidobacterium', u's\_\_']  
cteria', u'o\_\_Burkholderiales', u'f\_\_Comamonadaceae', u'g\_\_Ramilibacter', u's\_\_']  
>bacillales', u'f\_\_Streptococcaceae', u'g\_\_Streptococcus', u's\_\_infantis']  
'o\_\_Bacteroidales', u'f\_\_Porphyromonadaceae', u'g\_\_Parabacteroides', u's\_\_distasonis']  
>bacillales', u'f\_\_Streptococcaceae', u'g\_\_Streptococcus', u's\_\_']  
>bacteria', u'o\_\_Xanthomonadales', u'f\_\_Xanthomonadaceae', u'g\_\_Lysobacter', u's\_\_']  
>bacillales', u'f\_\_Lactobacillaceae', u'g\_\_Lactobacillus', u's\_\_zeae']  
t', u'o\_\_Actinomycetales', u'f\_\_Corynebacteriaceae', u'g\_\_Corynebacterium', u's\_\_']

>bacteria', u'o\_\_Enterobacteriales', u'f\_\_Enterobacteriaceae', u'g\_\_', u's\_\_']  
 :lostridiales', u'f\_\_Peptostreptococcaceae', u'g\_\_', u's\_\_']  
 i', u'o\_\_Actinomycetales', u'f\_\_Corynebacteriaceae', u'g\_\_Corynebacterium', u's\_\_']  
 lales', u'f\_\_Staphylococcaceae', u'g\_\_Staphylococcus', u's\_\_']

>bacillales', u'f\_\_Streptococcaceae', u'g\_\_Streptococcus']  
 i', u'o\_\_Actinomycetales', u'f\_\_Micrococcaceae', u'g\_\_Rothia', u's\_\_mucilaginoso']  
 >bacteria', u'o\_\_Pseudomonadales', u'f\_\_Pseudomonadaceae', u'g\_\_Pseudomonas', u's\_\_']  
 i', u'o\_\_Actinomycetales', u'f\_\_Corynebacteriaceae', u'g\_\_Corynebacterium', u's\_\_']  
 >bacillales', u'f\_\_Streptococcaceae', u'g\_\_Streptococcus', u's\_\_']  
 >bacillales', u'f\_\_Aerococcaceae', u'g\_\_Alloiococcus', u's\_\_']  
 :lostridiales', u'f\_\_Lachnospiraceae', u'g\_\_Coprococcus', u's\_\_']  
 i', u'o\_\_Actinomycetales', u'f\_\_Corynebacteriaceae', u'g\_\_Corynebacterium', u's\_\_']  
 :lostridiales', u'f\_\_Veillonellaceae', u'g\_\_Veillonella', u's\_\_']  
 :lostridiales', u'f\_\_Lachnospiraceae', u'g\_\_', u's\_\_']  
 lales', u'f\_\_Staphylococcaceae', u'g\_\_Staphylococcus']  
 i', u'o\_\_Actinomycetales', u'f\_\_Corynebacteriaceae', u'g\_\_Corynebacterium', u's\_\_']  
 'o\_\_Bacteroidales', u'f\_\_Porphyromonadaceae', u'g\_\_Parabacteroides', u's\_\_distasonis']  
 >bacteria', u'o\_\_Pseudomonadales', u'f\_\_Moraxellaceae', u'g\_\_Moraxella', u's\_\_']  
 :lostridiales', u'f\_\_Lachnospiraceae', u'g\_\_Dorea', u's\_\_']  
 >bacillales', u'f\_\_Streptococcaceae', u'g\_\_Streptococcus', u's\_\_']  
 :lostridiales', u'f\_\_Clostridiaceae', u'g\_\_', u's\_\_']  
 >bacillales', u'f\_\_Streptococcaceae', u'g\_\_Streptococcus', u's\_\_']  
 >bacteria', u'o\_\_Pseudomonadales', u'f\_\_Pseudomonadaceae', u'g\_\_Pseudomonas', u's\_\_']  
 >bacteria', u'o\_\_Enterobacteriales', u'f\_\_Enterobacteriaceae', u'g\_\_', u's\_\_']  
 'o\_\_Bacteroidales', u'f\_\_Bacteroidaceae', u'g\_\_Bacteroides', u's\_\_']  
 >bacteria', u'o\_\_Enterobacteriales', u'f\_\_Enterobacteriaceae', u'g\_\_', u's\_\_']  
 >bacillales', u'f\_\_Streptococcaceae', u'g\_\_Streptococcus', u's\_\_']  
 >bacillales', u'f\_\_Streptococcaceae', u'g\_\_Streptococcus', u's\_\_']

>bacillales', u'f\_\_Streptococcaceae', u'g\_\_Streptococcus', u's\_\_']  
 >bacillales', u'f\_\_Streptococcaceae', u'g\_\_Streptococcus', u's\_\_']  
 :lostridiales', u'f\_\_Peptostreptococcaceae', u'g\_\_', u's\_\_']  
 'o\_\_Bacteroidales', u'f\_\_Bacteroidaceae', u'g\_\_Bacteroides', u's\_\_']  
 >bacillales', u'f\_\_Streptococcaceae', u'g\_\_Streptococcus', u's\_\_']  
 :lostridiales', u'f\_\_Lachnospiraceae', u'g\_\_Dorea', u's\_\_']  
 :lostridiales', u'f\_\_Lachnospiraceae']  
 'o\_\_Bacteroidales', u'f\_\_Bacteroidaceae', u'g\_\_Bacteroides', u's\_\_']  
 >bacteria', u'o\_\_Pseudomonadales', u'f\_\_Pseudomonadaceae', u'g\_\_Pseudomonas', u's\_\_']  
 cterias', u'o\_\_Burkholderiales', u'f\_\_Comamonadaceae']  
 >bacteria', u'o\_\_Enterobacteriales', u'f\_\_Enterobacteriaceae', u'g\_\_Providencia', u's\_\_']  
 :lostridiales', u'f\_\_Clostridiaceae', u'g\_\_', u's\_\_']  
 >bacillales', u'f\_\_Streptococcaceae', u'g\_\_Streptococcus', u's\_\_']  
 >bacillales', u'f\_\_Streptococcaceae', u'g\_\_Streptococcus', u's\_\_']  
 nadia]', u'o\_\_[Fimbriimonadales]', u'f\_\_[Fimbriimonadaceae]', u'g\_\_Fimbriimonas', u's\_\_']  
 nadia]', u'o\_\_[Fimbriimonadales]', u'f\_\_[Fimbriimonadaceae]', u'g\_\_Fimbriimonas', u's\_\_']  
 >bacillales', u'f\_\_Streptococcaceae', u'g\_\_Lactococcus', u's\_\_']  
 'o\_\_Bacteroidales', u'f\_\_Prevotellaceae', u'g\_\_Prevotella', u's\_\_']  
 :lostridiales', u'f\_\_Veillonellaceae', u'g\_\_Veillonella', u's\_\_dispar']  
 >bacillales', u'f\_\_Streptococcaceae', u'g\_\_Streptococcus', u's\_\_']

:lostridiales', u'f\_\_Veillonellaceae']  
 >bacillales']  
 >bacteria', u'o\_\_Enterobacteriales', u'f\_\_Enterobacteriaceae', u'g\_\_', u's\_\_']  
 :lostridiales', u'f\_\_Clostridiaceae', u'g\_\_Clostridium']  
 :lostridiales', u'f\_\_Clostridiaceae', u'g\_\_Clostridium']

:lostridiales']  
 :lostridiales', u'f\_\_Lachnospiraceae', u'g\_\_[Ruminococcus]', u's\_\_']  
 cteria', u'o\_\_Neisseriales', u'f\_\_Neisseriaceae', u'g\_\_', u's\_\_']  
 :lostridiales', u'f\_\_Lachnospiraceae', u'g\_\_[Ruminococcus]', u's\_\_']  
 >bacillales', u'f\_\_Streptococcaceae', u'g\_\_Streptococcus', u's\_\_']  
 :lostridiales', u'f\_\_Lachnospiraceae', u'g\_\_', u's\_\_']  
 'o\_\_Bacteroidales', u'f\_\_Porphyromonadaceae', u'g\_\_Parabacteroides', u's\_\_distasonis']  
 >bacillales', u'f\_\_Aerococcaceae', u'g\_\_Alloiococcus', u's\_\_']  
 :lostridiales', u'f\_\_Clostridiaceae', u'g\_\_', u's\_\_']  
 >bacteria', u'o\_\_Enterobacteriales', u'f\_\_Enterobacteriaceae', u'g\_\_', u's\_\_']  
 i', u'o\_\_Actinomycetales', u'f\_\_Corynebacteriaceae', u'g\_\_Corynebacterium', u's\_\_']  
 :lostridiales', u'f\_\_Lachnospiraceae', u'g\_\_', u's\_\_']  
 :lostridiales', u'f\_\_Clostridiaceae', u'g\_\_', u's\_\_']  
 >bacillales', u'f\_\_Streptococcaceae', u'g\_\_Streptococcus', u's\_\_']  
 >bacteria', u'o\_\_Enterobacteriales', u'f\_\_Enterobacteriaceae', u'g\_\_', u's\_\_']  
 cteria', u'o\_\_Rhodocyclales', u'f\_\_Rhodocyclaceae', u'g\_\_', u's\_\_']  
 'o\_\_Bacteroidales', u'f\_\_Bacteroidaceae', u'g\_\_Bacteroides', u's\_\_']  
 :lostridiales', u'f\_\_Veillonellaceae', u'g\_\_Megasphaera', u's\_\_']  
 >bacillales', u'f\_\_Streptococcaceae', u'g\_\_Streptococcus', u's\_\_']  
 :lostridiales', u'f\_\_Lachnospiraceae', u'g\_\_[Ruminococcus]', u's\_\_gnavus']  
 :lostridiales', u'f\_\_Lachnospiraceae', u'g\_\_Coprococcus', u's\_\_']  
 acteria', u'o\_\_Rhizobiales', u'f\_\_Phyllobacteriaceae', u'g\_\_Phyllobacterium', u's\_\_']  
 >bacteria', u'o\_\_Pasteurellales', u'f\_\_Pasteurellaceae', u'g\_\_Haemophilus', u's\_\_']  
 i', u'o\_\_Actinomycetales', u'f\_\_Corynebacteriaceae', u'g\_\_Corynebacterium', u's\_\_']  
 i', u'o\_\_Bifidobacteriales', u'f\_\_Bifidobacteriaceae', u'g\_\_Bifidobacterium']  
 'o\_\_Bacteroidales', u'f\_\_Bacteroidaceae', u'g\_\_Bacteroides', u's\_\_']  
 ', u'o\_\_Coriobacteriales', u'f\_\_Coriobacteriaceae', u'g\_\_Eggerthella', u's\_\_lenta']  
 i', u'o\_\_Actinomycetales', u'f\_\_Corynebacteriaceae', u'g\_\_Corynebacterium', u's\_\_']  
 lales']  
 :lostridiales', u'f\_\_Lachnospiraceae', u'g\_\_[Ruminococcus]', u's\_\_gnavus']  
 i', u'o\_\_Actinomycetales', u'f\_\_Corynebacteriaceae', u'g\_\_Corynebacterium', u's\_\_']  
 >bacillales', u'f\_\_Streptococcaceae', u'g\_\_Streptococcus', u's\_\_']  
 :lostridiales', u'f\_\_Lachnospiraceae', u'g\_\_', u's\_\_']  
 'o\_\_Bacteroidales', u'f\_\_Prevotellaceae', u'g\_\_Prevotella', u's\_\_']  
 i', u'o\_\_Actinomycetales', u'f\_\_Corynebacteriaceae', u'g\_\_Corynebacterium', u's\_\_']  
 i', u'o\_\_Bifidobacteriales', u'f\_\_Bifidobacteriaceae', u'g\_\_Bifidobacterium', u's\_\_']  
 >bacillales', u'f\_\_Enterococcaceae', u'g\_\_Enterococcus', u's\_\_']  
 >bacillales', u'f\_\_Streptococcaceae', u'g\_\_Streptococcus', u's\_\_']  
 >bacillales', u'f\_\_Streptococcaceae', u'g\_\_Streptococcus', u's\_\_']  
 cteria', u'o\_\_Burkholderiales', u'f\_\_Alcaligenaceae', u'g\_\_Sutterella', u's\_\_']  
 :lostridiales', u'f\_\_Lachnospiraceae', u'g\_\_Epulopiscium', u's\_\_']  
 i', u'o\_\_Bifidobacteriales', u'f\_\_Bifidobacteriaceae', u'g\_\_Bifidobacterium', u's\_\_adolescentis']  
 >bacteria', u'o\_\_Pseudomonadales', u'f\_\_Pseudomonadaceae', u'g\_\_', u's\_\_']  
 >bacillales', u'f\_\_Streptococcaceae', u'g\_\_Streptococcus', u's\_\_']  
 >bacillales', u'f\_\_Streptococcaceae', u'g\_\_Streptococcus', u's\_\_']  
 lales', u'f\_\_Staphylococcaceae', u'g\_\_Staphylococcus', u's\_\_']  
 cteria', u'o\_\_Burkholderiales', u'f\_\_Comamonadaceae']  
 >bacillales', u'f\_\_Streptococcaceae', u'g\_\_Streptococcus', u's\_\_']  
 i', u'o\_\_Actinomycetales', u'f\_\_Corynebacteriaceae', u'g\_\_Corynebacterium', u's\_\_']  
 >bacteria', u'o\_\_Enterobacteriales', u'f\_\_Enterobacteriaceae', u'g\_\_', u's\_\_']  
 lales', u'f\_\_Staphylococcaceae', u'g\_\_Staphylococcus', u's\_\_']  
 :lostridiales', u'f\_\_Lachnospiraceae', u'g\_\_', u's\_\_']  
 cteria', u'o\_\_Burkholderiales', u'f\_\_Comamonadaceae', u'g\_\_', u's\_\_']  
 >bacillales', u'f\_\_Streptococcaceae', u'g\_\_Streptococcus', u's\_\_']  
 :lostridiales', u'f\_\_Clostridiaceae', u'g\_\_Clostridium', u's\_\_neonatale']  
 i', u'o\_\_Actinomycetales', u'f\_\_Corynebacteriaceae', u'g\_\_Corynebacterium', u's\_\_']



>bacteria', u'o\_\_Xanthomonadales', u'f\_\_Xanthomonadaceae', u'g\_\_Lysobacter', u's\_\_']  
 >bacillales', u'f\_\_Enterococcaceae', u'g\_\_Enterococcus']  
 :lostridiales', u'f\_\_Veillonellaceae', u'g\_\_Veillonella', u's\_\_dispar']  
 †, u'o\_\_Bifidobacteriales', u'f\_\_Bifidobacteriaceae', u'g\_\_Bifidobacterium', u's\_\_']  
 †, u'o\_\_Actinomycetales', u'f\_\_Corynebacteriaceae', u'g\_\_Corynebacterium', u's\_\_']  
 †, u'o\_\_Actinomycetales', u'f\_\_Corynebacteriaceae', u'g\_\_Corynebacterium', u's\_\_']  
 :lostridiales', u'f\_\_Veillonellaceae', u'g\_\_Veillonella', u's\_\_']  
 †obiae', u'o\_\_Verrucomicrobiales', u'f\_\_Verrucomicrobiaceae', u'g\_\_Akkermansia', u's\_\_muciniphila']  
 >bacillales', u'f\_\_Streptococcaceae', u'g\_\_Streptococcus', u's\_\_']  
 †, u'o\_\_Bifidobacteriales', u'f\_\_Bifidobacteriaceae', u'g\_\_Bifidobacterium', u's\_\_']  
 >bacillales', u'f\_\_Lactobacillaceae', u'g\_\_Lactobacillus', u's\_\_zeae']  
 :lostridiales', u'f\_\_Veillonellaceae', u'g\_\_Veillonella', u's\_\_dispar']  
 :lostridiales', u'f\_\_Veillonellaceae', u'g\_\_Veillonella', u's\_\_dispar']  
 'o\_\_Bacteroidales', u'f\_\_Porphyromonadaceae', u'g\_\_Parabacteroides', u's\_\_distasonis']  
 >bacteria', u'o\_\_Enterobacteriales', u'f\_\_Enterobacteriaceae', u'g\_\_', u's\_\_']  
 >bacteria', u'o\_\_Pasteurellales', u'f\_\_Pasteurellaceae', u'g\_\_Haemophilus', u's\_\_influenzae']  
 :lostridiales', u'f\_\_Lachnospiraceae', u'g\_\_[Ruminococcus]', u's\_\_gnavus']  
 :lostridiales', u'f\_\_Lachnospiraceae', u'g\_\_Blautia', u's\_\_']  
 :lostridiales', u'f\_\_Veillonellaceae', u'g\_\_Veillonella', u's\_\_dispar']  
 :lostridiales', u'f\_\_[Tissierellaceae]', u'g\_\_Finegoldia', u's\_\_']  
 >bacillales', u'f\_\_Streptococcaceae', u'g\_\_Streptococcus', u's\_\_']  
 >bacillales', u'f\_\_Streptococcaceae', u'g\_\_Streptococcus', u's\_\_']  
 >bacillales', u'f\_\_Enterococcaceae', u'g\_\_Vagococcus', u's\_\_salmoninarum']  
 †, u'o\_\_Bifidobacteriales', u'f\_\_Bifidobacteriaceae', u'g\_\_Bifidobacterium', u's\_\_']  
 'o\_\_Bacteroidales', u'f\_\_Prevotellaceae', u'g\_\_Prevotella', u's\_\_']  
 >bacillales', u'f\_\_Streptococcaceae', u'g\_\_Streptococcus', u's\_\_']  
 >bacillales', u'f\_\_Carnobacteriaceae', u'g\_\_Granulicatella', u's\_\_']  
 'o\_\_Bacteroidales', u'f\_\_Porphyromonadaceae', u'g\_\_Parabacteroides', u's\_\_distasonis']  
 >bacteria', u'o\_\_Enterobacteriales', u'f\_\_Enterobacteriaceae', u'g\_\_', u's\_\_']  
 †, u'o\_\_Bifidobacteriales', u'f\_\_Bifidobacteriaceae', u'g\_\_Bifidobacterium', u's\_\_']  
 :lostridiales', u'f\_\_[Tissierellaceae]', u'g\_\_Finegoldia', u's\_\_']  
 >bacillales', u'f\_\_Streptococcaceae', u'g\_\_Streptococcus', u's\_\_']  
 >bacillales', u'f\_\_Streptococcaceae', u'g\_\_Streptococcus', u's\_\_']  
 :lostridiales', u'f\_\_Lachnospiraceae', u'g\_\_[Ruminococcus]', u's\_\_gnavus']  
 >bacillales', u'f\_\_Streptococcaceae', u'g\_\_Streptococcus', u's\_\_']  
 :lostridiales', u'f\_\_Veillonellaceae', u'g\_\_Veillonella', u's\_\_dispar']  
 †, u'o\_\_Actinomycetales', u'f\_\_Corynebacteriaceae', u'g\_\_Corynebacterium', u's\_\_']  
 :lostridiales', u'f\_\_Lachnospiraceae', u'g\_\_', u's\_\_']  
 >bacillales', u'f\_\_Enterococcaceae', u'g\_\_Enterococcus', u's\_\_']  
 >bacillales', u'f\_\_Aerococcaceae', u'g\_\_Alloiococcus', u's\_\_']  
 >bacteria', u'o\_\_Enterobacteriales', u'f\_\_Enterobacteriaceae', u'g\_\_', u's\_\_']  
 'o\_\_Bacteroidales', u'f\_\_Porphyromonadaceae', u'g\_\_Porphyromonas', u's\_\_']  
 :lostridiales', u'f\_\_Clostridiaceae', u'g\_\_', u's\_\_']  
 :lostridiales', u'f\_\_Veillonellaceae', u'g\_\_Megasphaera', u's\_\_']  
 †, u'o\_\_Actinomycetales', u'f\_\_Corynebacteriaceae', u'g\_\_Corynebacterium', u's\_\_']  
 †, u'o\_\_Bifidobacteriales', u'f\_\_Bifidobacteriaceae', u'g\_\_Bifidobacterium']  
 >bacteria', u'o\_\_Enterobacteriales', u'f\_\_Enterobacteriaceae', u'g\_\_', u's\_\_']  
 'o\_\_Bacteroidales', u'f\_\_Bacteroidaceae', u'g\_\_Bacteroides', u's\_\_ovatus']  
 †obiae', u'o\_\_Verrucomicrobiales', u'f\_\_Verrucomicrobiaceae', u'g\_\_Akkermansia', u's\_\_muciniphila']  
 >bacillales', u'f\_\_Streptococcaceae', u'g\_\_Streptococcus', u's\_\_']  
 †, u'o\_\_Bifidobacteriales', u'f\_\_Bifidobacteriaceae', u'g\_\_Bifidobacterium', u's\_\_']  
 †, u'o\_\_Bifidobacteriales', u'f\_\_Bifidobacteriaceae', u'g\_\_Bifidobacterium', u's\_\_adolescentis']  
 >bacteria', u'o\_\_Enterobacteriales', u'f\_\_Enterobacteriaceae', u'g\_\_Trabulsilla']  
 >bacillales', u'f\_\_Lactobacillaceae', u'g\_\_Lactobacillus', u's\_\_']  
 †obiae', u'o\_\_Verrucomicrobiales', u'f\_\_Verrucomicrobiaceae', u'g\_\_Akkermansia', u's\_\_muciniphila']  
 >bacillales', u'f\_\_Streptococcaceae', u'g\_\_Streptococcus', u's\_\_']

>bacillales', u'f\_\_Streptococcaceae', u'g\_\_Streptococcus', u's\_\_']  
 'o\_\_Bacteroidales', u'f\_\_Bacteroidaceae', u'g\_\_Bacteroides', u's\_\_uniformis']  
 >bacillales', u'f\_\_Lactobacillaceae', u'g\_\_Lactobacillus', u's\_\_']  
 'l', u'o\_\_Bifidobacteriales', u'f\_\_Bifidobacteriaceae', u'g\_\_Bifidobacterium']  
 >bacillales', u'f\_\_Streptococcaceae', u'g\_\_Streptococcus', u's\_\_']  
 lales', u'f\_\_Bacillaceae', u'g\_\_Bacillus', u's\_\_']  
 >bacillales', u'f\_\_Streptococcaceae', u'g\_\_Streptococcus', u's\_\_']  
 >bacillales', u'f\_\_Aerococcaceae', u'g\_\_Alloiococcus', u's\_\_']  
 :lostridiales', u'f\_\_Lachnospiraceae', u'g\_\_Dorea', u's\_\_']  
 'l', u'o\_\_Actinomycetales', u'f\_\_Corynebacteriaceae', u'g\_\_Corynebacterium', u's\_\_']  
 :lostridiales', u'f\_\_Ruminococcaceae', u'g\_\_Oscillospira', u's\_\_']  
 >bacillales', u'f\_\_Aerococcaceae', u'g\_\_Alloiococcus', u's\_\_']  
 :lostridiales', u'f\_\_Lachnospiraceae', u'g\_\_Blautia', u's\_\_']  
 'l', u'o\_\_Actinomycetales', u'f\_\_Corynebacteriaceae', u'g\_\_Corynebacterium', u's\_\_']  
 'l', u'o\_\_Bifidobacteriales', u'f\_\_Bifidobacteriaceae', u'g\_\_Bifidobacterium', u's\_\_']  
 'l', u'o\_\_Bifidobacteriales', u'f\_\_Bifidobacteriaceae', u'g\_\_Bifidobacterium']  
 lales', u'f\_\_Staphylococcaceae', u'g\_\_Staphylococcus']  
 >Erysipelotrichales', u'f\_\_Erysipelotrichaceae', u'g\_\_', u's\_\_']  
 :lostridiales', u'f\_\_Eubacteriaceae', u'g\_\_Pseudoramibacter\_Eubacterium', u's\_\_']  
 >bacteria', u'o\_\_Pseudomonadales', u'f\_\_Moraxellaceae', u'g\_\_Moraxella', u's\_\_']  
 cteria', u'o\_\_Burkholderiales', u'f\_\_Alcaligenaceae', u'g\_\_Sutterella', u's\_\_']  
 ', u'o\_\_Coriobacteriales', u'f\_\_Coriobacteriaceae', u'g\_\_Collinsella', u's\_\_aerofaciens']  
 :lostridiales', u'f\_\_Clostridiaceae', u'g\_\_Clostridium', u's\_\_']  
 >bacillales', u'f\_\_Streptococcaceae', u'g\_\_Streptococcus', u's\_\_']  
 'l', u'o\_\_Actinomycetales', u'f\_\_Corynebacteriaceae', u'g\_\_Corynebacterium', u's\_\_']  
 'l', u'o\_\_Actinomycetales', u'f\_\_Corynebacteriaceae', u'g\_\_Corynebacterium', u's\_\_']  
 'o\_\_Bacteroidales', u'f\_\_Porphyromonadaceae', u'g\_\_Parabacteroides', u's\_\_distasonis']  
 >bacillales', u'f\_\_Streptococcaceae', u'g\_\_Streptococcus', u's\_\_']  
 cteria', u'o\_\_Neisseriales', u'f\_\_Neisseriaceae', u'g\_\_', u's\_\_']  
 >bacillales', u'f\_\_Streptococcaceae', u'g\_\_Streptococcus', u's\_\_']  
 >bacillales', u'f\_\_Streptococcaceae', u'g\_\_Streptococcus', u's\_\_']  
 >bacillales', u'f\_\_Streptococcaceae', u'g\_\_Streptococcus', u's\_\_']  
 cteria', u'o\_\_Burkholderiales', u'f\_\_Comamonadaceae', u'g\_\_', u's\_\_']  
 >bacteria', u'o\_\_Enterobacteriales', u'f\_\_Enterobacteriaceae', u'g\_\_', u's\_\_']  
 'o\_\_Bacteroidales', u'f\_\_Bacteroidaceae', u'g\_\_Bacteroides', u's\_\_']  
 'l', u'o\_\_Actinomycetales', u'f\_\_Corynebacteriaceae', u'g\_\_Corynebacterium', u's\_\_']  
 >bacillales', u'f\_\_Streptococcaceae', u'g\_\_Streptococcus', u's\_\_']  
 >bacteria', u'o\_\_Enterobacteriales', u'f\_\_Enterobacteriaceae', u'g\_\_', u's\_\_']  
 >bacillales', u'f\_\_Streptococcaceae', u'g\_\_Streptococcus', u's\_\_']  
 'o\_\_Bacteroidales', u'f\_\_Prevotellaceae', u'g\_\_Prevotella', u's\_\_']  
 'l', u'o\_\_Actinomycetales', u'f\_\_Corynebacteriaceae', u'g\_\_Corynebacterium', u's\_\_']  
 >bacillales', u'f\_\_Streptococcaceae', u'g\_\_Streptococcus', u's\_\_']  
 >bacillales', u'f\_\_Streptococcaceae', u'g\_\_Streptococcus', u's\_\_']  
 'l', u'o\_\_Actinomycetales', u'f\_\_Corynebacteriaceae', u'g\_\_Corynebacterium', u's\_\_']  
 'o\_\_Bacteroidales', u'f\_\_Prevotellaceae', u'g\_\_Prevotella', u's\_\_']  
 :lostridiales', u'f\_\_Lachnospiraceae']  
 lales', u'f\_\_Staphylococcaceae', u'g\_\_Staphylococcus', u's\_\_']  
 :lostridiales', u'f\_\_Lachnospiraceae', u'g\_\_', u's\_\_']  
 :lostridiales', u'f\_\_Lachnospiraceae', u'g\_\_', u's\_\_']  
 'l', u'o\_\_Bifidobacteriales', u'f\_\_Bifidobacteriaceae', u'g\_\_Bifidobacterium', u's\_\_']  
 :lostridiales']  
 :lostridiales', u'f\_\_Lachnospiraceae', u'g\_\_', u's\_\_']  
 >bacillales', u'f\_\_Streptococcaceae', u'g\_\_Streptococcus', u's\_\_']  
 cteria', u'o\_\_Burkholderiales', u'f\_\_Alcaligenaceae', u'g\_\_Sutterella', u's\_\_']  
 'l', u'o\_\_Bifidobacteriales', u'f\_\_Bifidobacteriaceae', u'g\_\_Bifidobacterium']  
 'l', u'o\_\_Actinomycetales', u'f\_\_Corynebacteriaceae', u'g\_\_Corynebacterium', u's\_\_']

:lostridiales', u'f\_\_Lachnospiraceae', u'g\_\_[Ruminococcus]', u's\_\_gnavus']  
 >bacillales', u'f\_\_Streptococcaceae', u'g\_\_Streptococcus', u's\_\_']  
 'o\_\_Bacteroidales', u'f\_\_Porphyromonadaceae', u'g\_\_Parabacteroides', u's\_\_distasonis']  
 >bacteria', u'o\_\_Enterobacteriales', u'f\_\_Enterobacteriaceae', u'g\_\_', u's\_\_']  
 :lostridiales', u'f\_\_Clostridiaceae', u'g\_\_', u's\_\_']  
 >bacillales', u'f\_\_Lactobacillaceae', u'g\_\_', u's\_\_']  
 :lostridiales', u'f\_\_Veillonellaceae', u'g\_\_Veillonella', u's\_\_parvula']  
  
 lales', u'f\_\_Staphylococcaceae', u'g\_\_Staphylococcus']  
 :lostridiales', u'f\_\_Lachnospiraceae', u'g\_\_Dorea', u's\_\_']  
 >bacteria', u'o\_\_Pseudomonadales', u'f\_\_Pseudomonadaceae', u'g\_\_', u's\_\_']  
 :lostridiales', u'f\_\_Ruminococcaceae', u'g\_\_Oscillospira', u's\_\_']  
 :lostridiales', u'f\_\_Lachnospiraceae', u'g\_\_[Ruminococcus]', u's\_\_gnavus']  
 >bacillales', u'f\_\_Streptococcaceae', u'g\_\_Streptococcus', u's\_\_']  
 :lostridiales', u'f\_\_Veillonellaceae', u'g\_\_Veillonella', u's\_\_dispar']  
 >bacillales', u'f\_\_Enterococcaceae', u'g\_\_Enterococcus']  
 >bacillales', u'f\_\_Lactobacillaceae', u'g\_\_Lactobacillus', u's\_\_']  
 cteria', u'o\_\_Burkholderiales', u'f\_\_Oxalobacteraceae', u'g\_\_', u's\_\_']  
 >bacillales', u'f\_\_Streptococcaceae', u'g\_\_Streptococcus']  
 >bacillales', u'f\_\_Streptococcaceae', u'g\_\_Streptococcus', u's\_\_']  
 i', u'o\_\_Actinomycetales', u'f\_\_Corynebacteriaceae', u'g\_\_Corynebacterium', u's\_\_']  
 >bacillales', u'f\_\_Lactobacillaceae', u'g\_\_Lactobacillus', u's\_\_']  
 acteria', u'o\_\_Rhizobiales', u'f\_\_Phyllobacteriaceae', u'g\_\_Phyllobacterium', u's\_\_']  
 cteria', u'o\_\_Neisseriales', u'f\_\_Neisseriaceae', u'g\_\_', u's\_\_']  
 >bacillales', u'f\_\_Streptococcaceae', u'g\_\_Streptococcus', u's\_\_']  
 >bacillales', u'f\_\_Streptococcaceae', u'g\_\_Streptococcus', u's\_\_']  
 >bacteria', u'o\_\_Pseudomonadales', u'f\_\_Pseudomonadaceae', u'g\_\_Pseudomonas', u's\_\_']  
 i', u'o\_\_Actinomycetales', u'f\_\_Micrococcaceae', u'g\_\_Rothia', u's\_\_mucilaginoso']  
 acteria', u'o\_\_Rickettsiales', u'f\_\_mitochondria', u'g\_\_', u's\_\_']  
 >bacteria', u'o\_\_Enterobacteriales', u'f\_\_Enterobacteriaceae', u'g\_\_', u's\_\_']  
 :lostridiales', u'f\_\_Peptostreptococcaceae', u'g\_\_', u's\_\_']  
 cteria', u'o\_\_Burkholderiales', u'f\_\_Oxalobacteraceae', u'g\_\_', u's\_\_']  
 :lostridiales', u'f\_\_Eubacteriaceae', u'g\_\_Pseudoramibacter\_Eubacterium', u's\_\_']  
 >bacillales', u'f\_\_Lactobacillaceae', u'g\_\_Lactobacillus', u's\_\_zeae']  
 cteria', u'o\_\_Neisseriales', u'f\_\_Neisseriaceae', u'g\_\_', u's\_\_']  
 >bacillales', u'f\_\_Enterococcaceae', u'g\_\_Enterococcus', u's\_\_']  
 :lostridiales', u'f\_\_Clostridiaceae', u'g\_\_', u's\_\_']  
 :lostridiales', u'f\_\_Lachnospiraceae', u'g\_\_Dorea', u's\_\_']  
 >bacillales', u'f\_\_', u'g\_\_', u's\_\_']  
 lales', u'f\_\_Planococcaceae', u'g\_\_', u's\_\_']  
 >bacteria', u'o\_\_Enterobacteriales', u'f\_\_Enterobacteriaceae', u'g\_\_', u's\_\_']  
 :lostridiales', u'f\_\_Lachnospiraceae', u'g\_\_', u's\_\_']  
 :lostridiales', u'f\_\_Lachnospiraceae', u'g\_\_', u's\_\_']  
 >bacteria', u'o\_\_Pseudomonadales', u'f\_\_Moraxellaceae', u'g\_\_Moraxella', u's\_\_']  
 'o\_\_Bacteroidales', u'f\_\_Porphyromonadaceae', u'g\_\_Parabacteroides', u's\_\_distasonis']  
 :lostridiales', u'f\_\_Lachnospiraceae', u'g\_\_Dorea', u's\_\_']  
 i', u'o\_\_Actinomycetales', u'f\_\_Corynebacteriaceae', u'g\_\_Corynebacterium', u's\_\_']  
 >bacillales', u'f\_\_Streptococcaceae', u'g\_\_Streptococcus', u's\_\_']  
 >bacillales', u'f\_\_Aerococcaceae', u'g\_\_Alloiococcus', u's\_\_']  
 >bacillales', u'f\_\_Lactobacillaceae', u'g\_\_Lactobacillus', u's\_\_zeae']  
 >bacillales', u'f\_\_Streptococcaceae', u'g\_\_Streptococcus', u's\_\_']  
 'o\_\_Bacteroidales', u'f\_\_Porphyromonadaceae', u'g\_\_Parabacteroides', u's\_\_distasonis']  
 >bacteria', u'o\_\_Enterobacteriales', u'f\_\_Enterobacteriaceae', u'g\_\_', u's\_\_']  
 :lostridiales', u'f\_\_Lachnospiraceae', u'g\_\_Blautia', u's\_\_']  
 >bacillales', u'f\_\_Streptococcaceae', u'g\_\_Streptococcus', u's\_\_']  
 :lostridiales', u'f\_\_Clostridiaceae', u'g\_\_Clostridium', u's\_\_']

>bacillales', u'f\_\_Streptococcaceae', u'g\_\_Streptococcus', u's\_\_']  
 >bacillales', u'f\_\_Streptococcaceae', u'g\_\_Streptococcus', u's\_\_']  
 >bacillales', u'f\_\_Streptococcaceae', u'g\_\_Streptococcus', u's\_\_']  
 :lostridiales', u'f\_\_Clostridiaceae', u'g\_\_', u's\_\_']  
 >bacteria', u'o\_\_Pasteurellales', u'f\_\_Pasteurellaceae', u'g\_\_Haemophilus', u's\_\_']  
 >bacteria', u'o\_\_Pasteurellales', u'f\_\_Pasteurellaceae', u'g\_\_Haemophilus', u's\_\_']  
 >bacillales', u'f\_\_Streptococcaceae', u'g\_\_Streptococcus', u's\_\_']  
 >bacteria', u'o\_\_Enterobacteriales', u'f\_\_Enterobacteriaceae', u'g\_\_', u's\_\_']  
 :lostridiales', u'f\_\_Veillonellaceae', u'g\_\_Veillonella', u's\_\_']  
 'o\_\_Bacteroidales', u'f\_\_Bacteroidaceae', u'g\_\_Bacteroides', u's\_\_']  
 :lostridiales', u'f\_\_Veillonellaceae', u'g\_\_Megasphaera', u's\_\_']  
 'l', u'o\_\_Actinomycetales', u'f\_\_Corynebacteriaceae', u'g\_\_Corynebacterium', u's\_\_']  
 :lostridiales', u'f\_\_Lachnospiraceae', u'g\_\_', u's\_\_']  
 >bacillales', u'f\_\_Streptococcaceae', u'g\_\_Streptococcus', u's\_\_']  
 'o\_\_Bacteroidales', u'f\_\_Bacteroidaceae', u'g\_\_Bacteroides', u's\_\_']  
 >bacillales', u'f\_\_Streptococcaceae', u'g\_\_Streptococcus', u's\_\_infantis']  
 :lostridiales', u'f\_\_Lachnospiraceae', u'g\_\_Dorea', u's\_\_']  
 :lostridiales', u'f\_\_Lachnospiraceae', u'g\_\_Coprococcus', u's\_\_']  
 lales', u'f\_\_Staphylococcaceae', u'g\_\_Staphylococcus', u's\_\_']  
 'l', u'o\_\_Bifidobacteriales', u'f\_\_Bifidobacteriaceae', u'g\_\_Bifidobacterium', u's\_\_']  
 :lostridiales', u'f\_\_Lachnospiraceae', u'g\_\_[Ruminococcus]', u's\_\_gnavus']  
 :lostridiales', u'f\_\_[Tissierellaceae]', u'g\_\_Finegoldia', u's\_\_']  
 :lostridiales', u'f\_\_Lachnospiraceae', u'g\_\_', u's\_\_']  
 :lostridiales', u'f\_\_Veillonellaceae', u'g\_\_Megasphaera', u's\_\_']  
 >bacillales', u'f\_\_Aerococcaceae', u'g\_\_Alloiococcus', u's\_\_']  
 'o\_\_Bacteroidales', u'f\_\_Bacteroidaceae', u'g\_\_Bacteroides', u's\_\_fragilis']  
 >bacillales', u'f\_\_Streptococcaceae', u'g\_\_Streptococcus', u's\_\_']  
 >bacteria', u'o\_\_Pasteurellales', u'f\_\_Pasteurellaceae', u'g\_\_Haemophilus', u's\_\_']  
 lales', u'f\_\_Staphylococcaceae']  
 >bacteria', u'o\_\_Enterobacteriales', u'f\_\_Enterobacteriaceae', u'g\_\_', u's\_\_']  
 >bacillales', u'f\_\_Streptococcaceae', u'g\_\_Streptococcus', u's\_\_']  
 'o\_\_Bacteroidales', u'f\_\_Bacteroidaceae', u'g\_\_Bacteroides', u's\_\_ovatus']  
 :lostridiales', u'f\_\_Veillonellaceae', u'g\_\_Veillonella', u's\_\_']  
 'l', u'o\_\_Actinomycetales', u'f\_\_Corynebacteriaceae', u'g\_\_Corynebacterium', u's\_\_']  
 :lostridiales', u'f\_\_Lachnospiraceae', u'g\_\_Blautia', u's\_\_']  
 'l', u'o\_\_Actinomycetales', u'f\_\_Corynebacteriaceae', u'g\_\_Corynebacterium', u's\_\_']  
 'o\_\_Bacteroidales', u'f\_\_Prevotellaceae', u'g\_\_Prevotella', u's\_\_']  
 'l', u'o\_\_Actinomycetales', u'f\_\_Actinomycetaceae', u'g\_\_Actinomyces', u's\_\_']  
 'l', u'o\_\_Actinomycetales', u'f\_\_Corynebacteriaceae', u'g\_\_Corynebacterium', u's\_\_']  
 :lostridiales', u'f\_\_Lachnospiraceae', u'g\_\_', u's\_\_']  
 :lostridiales', u'f\_\_Clostridiaceae', u'g\_\_', u's\_\_']  
 :lostridiales', u'f\_\_Lachnospiraceae', u'g\_\_[Ruminococcus]', u's\_\_gnavus']  
 :lostridiales', u'f\_\_Lachnospiraceae', u'g\_\_', u's\_\_']  
 >bacillales', u'f\_\_Streptococcaceae', u'g\_\_Streptococcus', u's\_\_']  
 'l', u'o\_\_Bifidobacteriales', u'f\_\_Bifidobacteriaceae', u'g\_\_Bifidobacterium', u's\_\_']  
 :lostridiales', u'f\_\_Veillonellaceae', u'g\_\_Megasphaera', u's\_\_']  
 >bacillales', u'f\_\_Lactobacillaceae', u'g\_\_Lactobacillus', u's\_\_zeae']  
 >bacillales', u'f\_\_Streptococcaceae', u'g\_\_Streptococcus', u's\_\_']  
 :lostridiales', u'f\_\_Lachnospiraceae', u'g\_\_Coprococcus', u's\_\_']  
 >bacteria', u'o\_\_Enterobacteriales', u'f\_\_Enterobacteriaceae', u'g\_\_', u's\_\_']  
 >bacteria', u'o\_\_Pseudomonadales', u'f\_\_Moraxellaceae', u'g\_\_Moraxella', u's\_\_']  
 lales', u'f\_\_Staphylococcaceae', u'g\_\_Staphylococcus', u's\_\_epidermidis']  
 'l', u'o\_\_Actinomycetales', u'f\_\_Corynebacteriaceae', u'g\_\_Corynebacterium', u's\_\_']  
 'o\_\_Bacteroidales', u'f\_\_Porphyromonadaceae', u'g\_\_Parabacteroides', u's\_\_distasonis']  
 lales', u'f\_\_Bacillaceae']  
 lales', u'f\_\_Staphylococcaceae', u'g\_\_Staphylococcus']

>bacteria', u'o\_\_Enterobacteriales', u'f\_\_Enterobacteriaceae', u'g\_\_Citrobacter', u's\_\_']  
 >bacteria', u'o\_\_Enterobacteriales', u'f\_\_Enterobacteriaceae']  
 i', u'o\_\_Bifidobacteriales', u'f\_\_Bifidobacteriaceae', u'g\_\_Bifidobacterium', u's\_\_']  
 >bacteria', u'o\_\_Enterobacteriales', u'f\_\_Enterobacteriaceae', u'g\_\_Citrobacter', u's\_\_']  
 >bacillales', u'f\_\_Streptococcaceae', u'g\_\_Streptococcus', u's\_\_']  
 >bacillales', u'f\_\_Streptococcaceae', u'g\_\_Streptococcus', u's\_\_']  
 >bacillales', u'f\_\_Streptococcaceae', u'g\_\_Streptococcus', u's\_\_']  
 >bacillales', u'f\_\_Aerococcaceae', u'g\_\_Alloiococcus', u's\_\_']  
 i', u'o\_\_Actinomycetales', u'f\_\_Corynebacteriaceae', u'g\_\_Corynebacterium', u's\_\_']  
 cteria', u'o\_\_Burkholderiales', u'f\_\_Comamonadaceae', u'g\_\_', u's\_\_']  
 >bacillales', u'f\_\_Streptococcaceae', u'g\_\_Streptococcus', u's\_\_']  
 :lostridiales', u'f\_\_Veillonellaceae', u'g\_\_Veillonella', u's\_\_dispar']  
 :lostridiales', u'f\_\_Veillonellaceae', u'g\_\_Veillonella', u's\_\_dispar']  
 >bacillales', u'f\_\_Streptococcaceae', u'g\_\_Streptococcus', u's\_\_']  
 cteria', u'o\_\_Burkholderiales', u'f\_\_Comamonadaceae', u'g\_\_', u's\_\_']  
 >bacteria', u'o\_\_Enterobacteriales', u'f\_\_Enterobacteriaceae', u'g\_\_', u's\_\_']  
 >bacteria', u'o\_\_Pseudomonadales', u'f\_\_Moraxellaceae', u'g\_\_Moraxella', u's\_\_']  
 >bacillales', u'f\_\_Aerococcaceae', u'g\_\_Alloiococcus', u's\_\_']  
 :lostridiales', u'f\_\_Ruminococcaceae', u'g\_\_Faecalibacterium', u's\_\_prausnitzii']  
 i', u'o\_\_Bifidobacteriales', u'f\_\_Bifidobacteriaceae', u'g\_\_Bifidobacterium']  
 >bacillales', u'f\_\_Lactobacillaceae', u'g\_\_Lactobacillus', u's\_\_zeae']  
 >bacillales', u'f\_\_Streptococcaceae', u'g\_\_Streptococcus', u's\_\_']  
 robiae', u'o\_\_Verrucomicrobiales', u'f\_\_Verrucomicrobiaceae', u'g\_\_Akkermansia', u's\_\_muciniphila']  
 lales', u'f\_\_Staphylococcaceae', u'g\_\_Staphylococcus']  
 >bacillales', u'f\_\_Streptococcaceae', u'g\_\_Streptococcus', u's\_\_']  
 >bacteria', u'o\_\_Enterobacteriales', u'f\_\_Enterobacteriaceae', u'g\_\_', u's\_\_']  
 'o\_\_Bacteroidales', u'f\_\_Bacteroidaceae', u'g\_\_Bacteroides', u's\_\_']  
 >bacteria', u'o\_\_Pseudomonadales', u'f\_\_Moraxellaceae', u'g\_\_Moraxella', u's\_\_']  
 i', u'o\_\_Actinomycetales', u'f\_\_Corynebacteriaceae', u'g\_\_Corynebacterium', u's\_\_']  
 >bacteria', u'o\_\_Enterobacteriales', u'f\_\_Enterobacteriaceae', u'g\_\_', u's\_\_']  
 >bacteria', u'o\_\_Pasteurellales', u'f\_\_Pasteurellaceae', u'g\_\_Haemophilus', u's\_\_']  
 :lostridiales', u'f\_\_Clostridiaceae', u'g\_\_', u's\_\_']  
 >bacillales', u'f\_\_Streptococcaceae', u'g\_\_Streptococcus']  
 >bacteria', u'o\_\_Enterobacteriales', u'f\_\_Enterobacteriaceae', u'g\_\_', u's\_\_']  
 >bacillales', u'f\_\_Streptococcaceae', u'g\_\_Streptococcus', u's\_\_']  
 >bacillales', u'f\_\_Lactobacillaceae', u'g\_\_Lactobacillus', u's\_\_']  
 'o\_\_Bacteroidales', u'f\_\_Bacteroidaceae', u'g\_\_Bacteroides', u's\_\_']  
 i', u'o\_\_Actinomycetales', u'f\_\_Corynebacteriaceae', u'g\_\_Corynebacterium', u's\_\_']  
 >bacillales', u'f\_\_Lactobacillaceae', u'g\_\_Lactobacillus', u's\_\_zeae']  
 :lostridiales', u'f\_\_Lachnospiraceae']  
 :lostridiales', u'f\_\_Lachnospiraceae', u'g\_\_Blautia', u's\_\_']  
  
 >bacillales', u'f\_\_Lactobacillaceae', u'g\_\_Lactobacillus', u's\_\_zeae']  
 >bacillales', u'f\_\_Carnobacteriaceae', u'g\_\_Granulicatella', u's\_\_']  
 >bacillales', u'f\_\_Streptococcaceae', u'g\_\_Streptococcus', u's\_\_']  
 >bacillales', u'f\_\_Streptococcaceae', u'g\_\_Streptococcus', u's\_\_']  
 >bacillales', u'f\_\_Streptococcaceae', u'g\_\_Streptococcus', u's\_\_']  
 :lostridiales', u'f\_\_Lachnospiraceae']  
 >bacteria', u'o\_\_Enterobacteriales', u'f\_\_Enterobacteriaceae', u'g\_\_Proteus', u's\_\_']  
 :lostridiales', u'f\_\_Lachnospiraceae', u'g\_\_', u's\_\_']  
 >bacillales', u'f\_\_Aerococcaceae', u'g\_\_Alloiococcus', u's\_\_']  
 'o\_\_Bacteroidales', u'f\_\_Porphyromonadaceae', u'g\_\_Parabacteroides', u's\_\_distasonis']  
 :lostridiales', u'f\_\_Veillonellaceae', u'g\_\_Veillonella', u's\_\_']  
 :lostridiales', u'f\_\_Clostridiaceae', u'g\_\_', u's\_\_']  
 :lostridiales', u'f\_\_Veillonellaceae', u'g\_\_Megamonas', u's\_\_']  
 :lostridiales', u'f\_\_Lachnospiraceae', u'g\_\_Blautia', u's\_\_']

:lostridiales', u'f\_\_Clostridiaceae', u'g\_\_', u's\_\_']  
 i', u'o\_\_Actinomycetales', u'f\_\_Corynebacteriaceae', u'g\_\_Corynebacterium', u's\_\_']  
 'o\_\_Bacteroidales', u'f\_\_Bacteroidaceae', u'g\_\_Bacteroides', u's\_\_']  
 :lostridiales', u'f\_\_', u'g\_\_', u's\_\_']  
 :lostridiales', u'f\_\_Lachnospiraceae', u'g\_\_[Ruminococcus]', u's\_\_gnavus']  
 i', u'o\_\_Actinomycetales', u'f\_\_Corynebacteriaceae', u'g\_\_Corynebacterium', u's\_\_']  
 'o\_\_Bacteroidales', u'f\_\_Bacteroidaceae', u'g\_\_Bacteroides', u's\_\_']  
 >bacillales', u'f\_\_Streptococcaceae', u'g\_\_Streptococcus', u's\_\_']  
 >bacillales', u'f\_\_Streptococcaceae', u'g\_\_Streptococcus', u's\_\_']  
 >bacillales', u'f\_\_Streptococcaceae', u'g\_\_Streptococcus', u's\_\_']  
 >bacteria', u'o\_\_Enterobacteriales', u'f\_\_Enterobacteriaceae', u'g\_\_', u's\_\_']  
 cteria', u'o\_\_Burkholderiales', u'f\_\_Comamonadaceae', u'g\_\_', u's\_\_']  
 >bacillales', u'f\_\_Lactobacillaceae', u'g\_\_Lactobacillus', u's\_\_']  
 i', u'o\_\_Bifidobacteriales', u'f\_\_Bifidobacteriaceae', u'g\_\_Bifidobacterium', u's\_\_adolescentis']  
 >bacteria', u'o\_\_Enterobacteriales', u'f\_\_Enterobacteriaceae', u'g\_\_', u's\_\_']  
 :lostridiales', u'f\_\_Lachnospiraceae', u'g\_\_[Ruminococcus]', u's\_\_']  
 >bacillales', u'f\_\_Streptococcaceae', u'g\_\_Streptococcus', u's\_\_']  
 :lostridiales', u'f\_\_Lachnospiraceae', u'g\_\_', u's\_\_']  
 :lostridiales', u'f\_\_Ruminococcaceae', u'g\_\_Oscillospira', u's\_\_']  
 i', u'o\_\_Actinomycetales', u'f\_\_Corynebacteriaceae', u'g\_\_Corynebacterium', u's\_\_']  
 >bacteria', u'o\_\_Enterobacteriales', u'f\_\_Enterobacteriaceae', u'g\_\_', u's\_\_']  
 cteria', u'o\_\_Burkholderiales', u'f\_\_Comamonadaceae']  
 :lostridiales', u'f\_\_Lachnospiraceae', u'g\_\_', u's\_\_']  
 cteria', u'o\_\_Burkholderiales', u'f\_\_Oxalobacteraceae', u'g\_\_', u's\_\_']  
 i', u'o\_\_Actinomycetales', u'f\_\_Corynebacteriaceae', u'g\_\_Corynebacterium', u's\_\_']  
 >bacillales', u'f\_\_Streptococcaceae', u'g\_\_Streptococcus', u's\_\_']  
 >bacteria', u'o\_\_Pseudomonadales', u'f\_\_Pseudomonadaceae', u'g\_\_Pseudomonas', u's\_\_']  
 >bacillales', u'f\_\_Streptococcaceae', u'g\_\_Streptococcus', u's\_\_']  
 cteria', u'o\_\_Neisseriales', u'f\_\_Neisseriaceae', u'g\_\_', u's\_\_']  
 >bacillales', u'f\_\_Streptococcaceae', u'g\_\_Streptococcus', u's\_\_']  
 >bacillales', u'f\_\_Streptococcaceae', u'g\_\_Streptococcus', u's\_\_']  
 :lostridiales', u'f\_\_Veillonellaceae', u'g\_\_Veillonella', u's\_\_parvula']  
 >\_\_Erysipelotrichales', u'f\_\_Erysipelotrichaceae', u'g\_\_', u's\_\_']  
 :lostridiales', u'f\_\_Ruminococcaceae', u'g\_\_', u's\_\_']  
 >bacillales', u'f\_\_Streptococcaceae', u'g\_\_Streptococcus', u's\_\_']  
 'o\_\_Bacteroidales', u'f\_\_Bacteroidaceae', u'g\_\_Bacteroides', u's\_\_']  
 'obiae', u'o\_\_Verrucomicrobiales', u'f\_\_Verrucomicrobiaceae', u'g\_\_Akkermansia', u's\_\_muciniphila']  
 i', u'o\_\_Actinomycetales', u'f\_\_Corynebacteriaceae', u'g\_\_Corynebacterium', u's\_\_']  
 i', u'o\_\_Actinomycetales', u'f\_\_Corynebacteriaceae', u'g\_\_Corynebacterium', u's\_\_']
